# Supplementary material
Source: publisher figshare collection journal article supplement (https://acs.figshare.com/ndownloader/files/14806094)
Supplement: Supplementary file 1 [file 14806094]

## Sheet: MassAnalyzer report
Antistreptavidin IgG2 Modification Summary
(a-Calibration)
Protein Sequence
>Antistreptavidin IgG2 HC
QLQLQESGPGLVKPSGTLSLTCAVSGGSISSGNWWSWVRQPPGKGLEWIGEISHSGTTNYNPSLKSRVTISGDKSKNQFSLELTSVTAADTAVYYCARNFDYWGQGTLVTVSSASTKGPSVFPLAPCSRSTSESTAALGCLVKDYFPEPVTVSWNSGALTSGVHTFPAVLQSSGLYSLSSVVTVPSSNFGTQTYTCNVDHKPSNTKVDKTVERKCCVECPPCPAPPVAGPSVFLFPPKPKDTLMISRTPEVTCVVVDVSHEDPEVQFNWYVDGVEVHNAKTKPREEQFNSTFRVVSVLTVVHQDWLNGKEYKCKVSNKGLPAPIEKTISKTKGQPREPQVYTLPPSREEMTKNQVSLTCLVKGFYPSDIAVEWESNGQPENNYKTTPPMLDSDGSFFLY…
>Antistreptavidin IgG2 LC
QSVVTQPPSVSGAPGQRVTISCTGSSSNIGAGYDVHWYQQLPGTAPKLLIYGNSNRPSGVPDRFSGSKSGTSASLAITGLQAEDEADYYCQSYDSSLSGLYVFGTGTKVTVLGQPKANPTVTLFPPSSEELQANKATLVCLISDFYPGAVTVAWKADSSPVKAGVETTTPSKQSNNKYAASSYLSLTPEQWKSHRSYSCQVTHEGSTVEKTVAPTECS
Protease = Trypsin
Cleaves at C-terminus of KR
Key Data Processing Parameters
MS Noise Level = 3600
S/N Threshold = 331
Typical Chromatographic Peak Width = 0.14
Maximum Chromatographic Peak Width = 1.61
Mass Tolerance = 5 ppm
Max Time Shift before Alignment = 3.18 min
Maximum Peptide Mass = 6800
Mass Accuracy = 6 ppm
Disulfide Bonds = Reduced
Glycosylation = CHO Glycan
Crosslinks = No
Minimum Confidence = 0.8
Mass Changes for Unspecified Modifications = -58 - 17
Amino Acid Substitutions = Common misincorporations
Ion Selection Criteria for Quantitation
Peptide Selection Criteria = 50% of the most abundant peptide
Charge Selection Criteria = 33% of the most abundant charge state
File Name						ATS_Try_C1	ATS_Try_C2	ATS_Try_C3	ATS_Try_C4	ATS_Try_C5	ATS_Try_C6	ATS_Try_S1	ATS_Try_S2	ATS_Try_S3	ATS_Try_S4	ATS_Try_S5	ATS_Try_S6	ATS_Try_C1 (2)	ATS_Try_C2 (2)	ATS_Try_C3 (2)	ATS_Try_S1 (2)	ATS_Try_S2 (2)	ATS_Try_S3 (2)	ATS_Try_CS1_1	ATS_Try_CS1_2	ATS_Try_CS1_3	ATS_Try_CS2_1	ATS_Try_CS2_2	ATS_Try_CS2_3	ATS_Try_C1 (3)	ATS_Try_C2 (3)	ATS_Try_C3 (3)	ATS_Try_S1 (3)	ATS_Try_S2 (3)	ATS_Try_S3 (3)	ATS_Try_CS1_1 (2)	ATS_Try_CS1_2 (2)	ATS_Try_CS1_3 (2)	ATS_Try_CS2_1 (2)	ATS_Try_CS2_2 (2)	ATS_Try_CS2_3 (2)	ATS_Try_C1 (4)	ATS_Try_C2 (4)	ATS_Try_C3 (4)	ATS_Try_S1 (4)	ATS_Try_S2 (4)	ATS_Try_S3 (4)	ATS_Try_CS1_1 (3)	ATS_Try_CS1_2 (3)
Sample Name						Antistreptavidin_Try_control	Antistreptavidin_Try_control	Antistreptavidin_Try_control	Antistreptavidin_Try_control	Antistreptavidin_Try_control	Antistreptavidin_Try_control	Antistreptavidin_Try_Stability	Antistreptavidin_Try_Stability	Antistreptavidin_Try_Stability	Antistreptavidin_Try_Stability	Antistreptavidin_Try_Stability	Antistreptavidin_Try_Stability	ATS_Try_control	ATS_Try_control	ATS_Try_control	ATS_Try_Stability	ATS_Try_Stability	ATS_Try_Stability	ATS_Try_ControlandStability (9:1)	ATS_Try_ControlandStability (9:1)	ATS_Try_ControlandStability (9:1)	ATS_Try_ControlandStability (8:2)	ATS_Try_ControlandStability (8:2)	ATS_Try_ControlandStability (8:2)	ATS_Try_control	ATS_Try_control	ATS_Try_control	ATS_Try_Stability	ATS_Try_Stability	ATS_Try_Stability	ATS_Try_ControlandStability (9:1)	ATS_Try_ControlandStability (9:1)	ATS_Try_ControlandStability (9:1)	ATS_Try_ControlandStability (8:2)	ATS_Try_ControlandStability (8:2)	ATS_Try_ControlandStability (8:2)	ATS control	ATS control	ATS control	ATS Stability	ATS Stability	ATS Stability	ATS Control and Stability (9:1)	ATS Control and Stability (9:1)
Sample Id						2	3	4	5	6	7	8	9	10	11	12	13	2	3	4	8	9	10	11	12	13	24	32	33	2	3	4	8	9	10	11	12	13	24	32	33	2	3	4	11	12	13	21	22
Comment						Expt #1, Column peptide CSH15cm, HPLC:Knox, Biospin desalting	Expt #1, Column peptide CSH15cm, HPLC:Knox, Biospin desalting	Expt #1, Column peptide CSH15cm, HPLC:Knox, Biospin desalting	Expt #1, Column peptide CSH15cm, HPLC:Knox, Biospin desalting	Expt #1, Column peptide CSH15cm, HPLC:Knox, Biospin desalting	Expt #1, Column peptide CSH15cm, HPLC:Knox, Biospin desalting	Expt #1, Column peptide CSH15cm, HPLC:Knox, Biospin desalting	Expt #1, Column peptide CSH15cm, HPLC:Knox, Biospin desalting	Expt #1, Column peptide CSH15cm, HPLC:Knox, Biospin desalting	Expt #1, Column peptide CSH15cm, HPLC:Knox, Biospin desalting	Expt #1, Column peptide CSH15cm, HPLC:Knox, Biospin desalting	Expt #1, Column peptide CSH15cm, HPLC:Knox, Biospin desalting	Expt #2A, Column peptide CSH15cm, HPLC:Knox, Biospin desalting	Expt #2A, Column peptide CSH15cm, HPLC:Knox, Biospin desalting	Expt #2A, Column peptide CSH15cm, HPLC:Knox, Biospin desalting	Expt #2A, Column peptide CSH15cm, HPLC:Knox, Biospin desalting	Expt #2A, Column peptide CSH15cm, HPLC:Knox, Biospin desalting	Expt #2A, Column peptide CSH15cm, HPLC:Knox, Biospin desalting	Expt #2A, Column peptide CSH15cm, HPLC:Knox, Biospin desalting	Expt #2A, Column peptide CSH15cm, HPLC:Knox, Biospin desalting	Expt #2A, Column peptide CSH15cm, HPLC:Knox, Biospin desalting	Expt #2A, Column peptide CSH15cm, HPLC:Knox, Biospin desalting	Expt #2A, Column peptide CSH15cm, HPLC:Knox, Biospin desalting	Expt #2A, Column peptide CSH15cm, HPLC:Knox, Biospin desalting	Expt #2A, Column peptide CSH15cm, HPLC:Knox, Microcon 30K digestion	Expt #2A, Column peptide CSH15cm, HPLC:Knox, Microcon 30K digestion	Expt #2A, Column peptide CSH15cm, HPLC:Knox, Microcon 30K digestion	Expt #2A, Column peptide CSH15cm, HPLC:Knox, Microcon 30K digestion	Expt #2A, Column peptide CSH15cm, HPLC:Knox, Microcon 30K digestion	Expt #2A, Column peptide CSH15cm, HPLC:Knox, Microcon 30K digestion	Expt #2A, Column peptide CSH15cm, HPLC:Knox, Microcon 30K digestion	Expt #2A, Column peptide CSH15cm, HPLC:Knox, Microcon 30K digestion	Expt #2A, Column peptide CSH15cm, HPLC:Knox, Microcon 30K digestion	Expt #2A, Column peptide CSH15cm, HPLC:Knox, Microcon 30K digestion	Expt #2A, Column peptide CSH15cm, HPLC:Knox, Microcon 30K digestion	Expt #2A, Column peptide CSH15cm, HPLC:Knox, Microcon 30K digestion	MAM expt 2A- Biospin_ MS: Lumos, LC: 1290 (Knox), peptide CSHcolumn with FA	MAM expt 2A- Biospin_ MS: Lumos, LC: 1290 (Knox), peptide CSHcolumn with FA	MAM expt 2A- Biospin_ MS: Lumos, LC: 1290 (Knox), peptide CSHcolumn with FA	MAM expt 2A- Biospin_ MS: Lumos, LC: 1290 (Knox), peptide CSHcolumn with FA	MAM expt 2A- Biospin_ MS: Lumos, LC: 1290 (Knox), peptide CSHcolumn with FA	MAM expt 2A- Biospin_ MS: Lumos, LC: 1290 (Knox), peptide CSHcolumn with FA	MAM expt 2A- Biospin_ MS: Lumos, LC: 1290 (Knox), peptide CSHcolumn with FA	MAM expt 2A- Biospin_ MS: Lumos, LC: 1290 (Knox), peptide CSHcolumn with FA
Injection Time (h)						0	1.09389	2.18833	3.28278	4.37694	5.47139	6.56583	7.66	8.75389	9.84833	10.9436	12.0381	195.78	196.874	197.968	199.062	200.156	201.251	202.345	203.439	204.533	205.627	206.721	207.816	242.55	243.645	244.74	245.835	246.93	248.024	249.119	250.215	251.309	252.404	253.499	254.594	359.389	360.484	361.578	362.672	363.766	364.861	365.955	367.049
Quality Controls
			Relative Load			0.344	0.311	0.346	0.309	0.323	0.325	0.341	0.37	0.375	0.373	0.367	0.372	0.242	0.217	0.315	0.349	0.363	0.366	0.306	0.33	0.307	0.324	0.298	0.337	0.247	0.277	0.2	0.285	0.264	0.271	0.218	0.268	0.285	0.316	0.495	0.51	0.736	0.736	0.809	0.787	0.847	0.86	0.778	0.773
			Identification Rate (by area)			0.6626	0.665	0.6705	0.6657	0.6731	0.6753	0.6813	0.689	0.6867	0.6877	0.681	0.688	0.6627	0.661	0.6693	0.667	0.6791	0.6776	0.6752	0.6762	0.6754	0.6773	0.6795	0.6804	0.6397	0.6659	0.6434	0.6762	0.6708	0.6768	0.6673	0.676	0.6795	0.6708	0.6691	0.6772	0.693	0.6969	0.7004	0.6949	0.704	0.7078	0.7032	0.7065
			Abundance of Top Unidentified (> 500 Da, relative to top identified)			0.2513	0.2827	0.2934	0.291	0.2416	0.2968	0.2533	0.3412	0.33	0.2526	0.33	0.3475	0.3212	0.2774	0.2585	0.3024	0.2597	0.2669	0.2681	0.3083	0.3376	0.3225	0.3365	0.2579	0.4172	0.3627	0.3077	0.3838	0.3693	0.3945	0.3272	0.4012	0.383	0.334	0.479	0.4378	0.4224	0.3196	0.3211	0.4607	0.3181	0.3641	0.3732	0.3527
			Digestion Efficiency			1	1	1	1	1	1	1	1	1	1	1	1	1	1	1	1	1	1	1	1	1	1	1	1	1	1	1	1	1	1	1	1	1	1	1	1	1	1	1	1	1	1	1	1
			Intensity&Length-Weighted Sequence Coverage			0.462	0.4558	0.4655	0.4639	0.4659	0.461	0.4601	0.4626	0.4646	0.4658	0.4706	0.4702	0.4328	0.4377	0.4546	0.4595	0.4576	0.4591	0.4521	0.4593	0.4581	0.4623	0.4564	0.46	0.4448	0.4417	0.45	0.4402	0.45	0.445	0.4455	0.4519	0.4649	0.4801	0.4795	0.4876	0.5113	0.5151	0.5194	0.5242	0.5261	0.5277	0.5251	0.5254
			Ions (Modified) Meeting Selection Criteria for Quantitation			264	262	264	265	265	265	264	264	265	265	265	264	262	264	264	265	265	265	265	265	262	265	265	265	262	264	265	262	265	264	262	264	264	265	262	264	265	265	265	265	265	265	265	265
Protein	Residue #	Modification	Category	Modified Peptides	Peptide Sequence	Abundance	Abundance	Abundance	Abundance	Abundance	Abundance	Abundance	Abundance	Abundance	Abundance	Abundance	Abundance	Abundance	Abundance	Abundance	Abundance	Abundance	Abundance	Abundance	Abundance	Abundance	Abundance	Abundance	Abundance	Abundance	Abundance	Abundance	Abundance	Abundance	Abundance	Abundance	Abundance	Abundance	Abundance	Abundance	Abundance	Abundance	Abundance	Abundance	Abundance	Abundance	Abundance	Abundance	Abundance
1:Antistreptavidin IgG2 HC	1	Q1+17.0265	N-Terminal Gln	1:Q1-R39 = 4113.0266m(Q1+17.0265)	QLQLQESGPGLVKPSGTLSLTCAVSGGSISSGNWWSWVR	0.0187473	0.0118289	0.0202715	0.0199527	0.0171268	0.0182502	0.00307931	0.00278938	0.00261299	0.00289094	0.00285003	0.00217906	0.0158137	0.0167133	0.0197844	0.00353337	0.00253993	0.0028658	0.0179737	0.0161769	0.0166622	0.0162699	0.0183985	0.0164672	0.0164334	0.021719	0.0171249	0.00204018	0.00245344	0.00216337	0.0119284	0.0148368	0.0172015	0.0172589	0.0145633	0.016556	0.00651863	0.00718088	0.00682774	0.00126707	0.0010552	0.00089615	0.0063131	0.00653233
1:Antistreptavidin IgG2 HC	13	K13+Glycation	+Glycation	1:Q1-R39 = 4113.0266m(K13+Glycation)	QLQLQESGPGLVKPSGTLSLTCAVSGGSISSGNWWSWVR	0.000126549	9.33757e-05	0.000173786	0.00014199	0.000201563	0.000195748	0.000217364	0.000279906	0.000240739	0.000250824	0.000231995	0.000204059	0.000150806	0.000155749	0.000172089	0.00024965	0.000255361	0.000208172	0.000157914	0.000176022	0.000164554	0.000214784	0.000188175	0.000219576	0.000122895	0.00014902	0.000181286	0.000213237	0.000201337	0.00024553	0.000174945	0.000193631	0.00015344	0.000230442	0.000225334	0.000165917	0.000180086	0.000168541	0.000171106	0.000227626	0.000233829	0.000224401	0.000179283	0.000180645
1:Antistreptavidin IgG2 HC	30	S30+C-term clip	C-term Clip	1:Q1-S30 = 2954.4907m[nonspecific]	QLQLQESGPGLVKPSGTLSLTCAVSGGSIS	0.000433739	0.000172498	0.000388103	0.000403956	0.000287098	0.000319969	0.00204045	0.00227525	0.0020458	0.00218596	0.00194109	0.00201073	0.000468548	0.000298302	0.000302405	0.00186357	0.00191108	0.00232476	0.000680897	0.000594536	0.000479384	0.000751657	0.000904712	0.00070107	0.000184844	0.000135668	0.000157381	0.000654573	0.000952086	0.000877915	0.000284969	0.000262064	0.000324832	0.000346386	0.000526568	0.000555851	0.00012594	0.000105588	9.66637e-05	0.000595893	0.000602936	0.000539803	0.00018393	0.000163337
1:Antistreptavidin IgG2 HC	31	S31+N-term clip	N-term Clip	1:S31-R39 = 1176.5465m[nonspecific]	SGNWWSWVR	0.00139803	0.00126306	0.00142459	0.0013677	0.00113456	0.00115577	0.00712463	0.00830598	0.00695446	0.00636566	0.00521646	0.00557918	0.00344439	0.000834615	0.00121748	0.00726818	0.00704001	0.00708288	0.00243889	0.00255455	0.00222958	0.00277187	0.00292068	0.00245224	0.00246059	0.00199818	0.00143579	0.0151931	0.0116054	0.00742682	0.00267291	0.00293593	0.00271683	0.00242073	0.00348593	0.00357439	0.000355811	0.000327624	0.000278869	0.00170668	0.00170655	0.00160053	0.000508835	0.000496037
1:Antistreptavidin IgG2 HC	34	~W34+Double Oxidation	+Double Oxidation	1:Q1-R39 = 4113.0266m(~W34+Double Oxidation)	QLQLQESGPGLVKPSGTLSLTCAVSGGSISSGNWWSWVR	0.00090453	0.000832936	0.000793238	0.000797032	0.000733838	0.00100482	0.00177253	0.00150633	0.00184211	0.00171157	0.00184737	0.00172683	0.00149631	0.000545968	0.000992903	0.00175199	0.00170173	0.00205412	0.00121231	0.00117836	0.000998571	0.00116043	0.000907746	0.00109369	0.00136039	0.000893022	0.0010637	0.00197889	0.00274497	0.00196459	0.00113373	0.0011678	0.000827918	0.00129807	0.00101512	0.000774645	0.00135047	0.00122733	0.00115879	0.00209992	0.00198762	0.00179635	0.00140971	0.00127206
1:Antistreptavidin IgG2 HC	34	~W34+Oxidation to kynurenine	+Oxidation to kynurenine	1:Q1-R39 = 4113.0266m(~W34+Oxidation to kynurenine)	QLQLQESGPGLVKPSGTLSLTCAVSGGSISSGNWWSWVR	0.000550886	0.000870536	0.00144599	0.00131685	0.00121302	0.00147411	0.00516646	0.0048449	0.00480283	0.00469095	0.0049749	0.0049268	0.00125201	0.000872605	0.000924836	0.00473113	0.00444157	0.00529596	0.00148794	0.00148134	0.00148781	0.00198577	0.00167288	0.00230884	0.00094681	0.00129371	0.00120977	0.00416949	0.00539504	0.00531905	0.0016067	0.00190964	0.00160396	0.00222091	0.00243066	0.00196548	0.000715021	0.000912091	0.000941256	0.00375182	0.00402985	0.00363065	0.00131903	0.00121221
1:Antistreptavidin IgG2 HC	37	~W37+Double Oxidation	+Double Oxidation	1:Q1-R39 = 4113.0266m(~W37+Double Oxidation)	QLQLQESGPGLVKPSGTLSLTCAVSGGSISSGNWWSWVR	0.000710412	0.00083464	0.000900585	0.000632287	0.000827038	0.000904444	0.000590124	0.000749681	0.00057323	0.000805811	0.000863964	0.000766781	0.00114503	0.000701799	0.00120719	0.00100096	0.000930345	0.00130849	0.00124397	0.00110267	0.000679394	0.00110289	0.000942028	0.000810563	0.00174077	0.00147292	0.00144849	0.00112109	0.00127489	0.00126583	0.000946836	0.00118006	0.00117403	0.00118533	0.00111892	0.00113585	0.00106721	0.00099504	0.00103769	0.00141157	0.00137283	0.000924773	0.00104377	0.00106931
1:Antistreptavidin IgG2 HC	44	K44+Glycation	+Glycation	1:Q40-K65 = 2809.4035m(K44+Glycation)	QPPGKGLEWIGEISHSGTTNYNPSLK	0.000332118	0.000321062	0.000413817	0.00040137	0.000379943	0.000435354	0.000657359	0.000640314	0.000649093	0.000661142	0.00067431	0.000730239	0.000385176	0.000278215	0.000390589	0.000645924	0.000627934	0.000662424	0.000448043	0.000383862	0.00043406	0.000445899	0.000348285	0.000426624	0.000396518	0.00039841	0.000322391	0.000639916	0.000512171	0.000600035	0.000311241	0.000389459	0.000413404	0.000216371	0.000473117	0.000465688	0.000232991	0.000222144	0.000236404	0.000406786	0.000424623	0.000413364	0.000286844	0.000267997
1:Antistreptavidin IgG2 HC	48	W48+Double Oxidation	+Double Oxidation	1:G45-K65 = 2302.1230m(W48+Double Oxidation)	GLEWIGEISHSGTTNYNPSLK	0.000289722	0.000210947	0.000263339	0.000245553	0.00027182	0.000366684	0.000287208	0.000263	0.000202201	0.00024259	0.000341879	0.000241409	0.000611382	0.000470734	0.00046511	0.000490516	0.000443057	0.000411015	0.000505863	0.000418314	0.000449304	0.000443612	0.000350247	0.00045089	0.00160394	0.00108049	0.00112234	0.00149236	0.000698961	0.00111548	0.000845736	0.000920772	0.000827513	0.00041279	0.000718966	0.000924485	0.000452933	0.000402019	0.000372586	0.000374502	0.000345355	0.00033424	0.000411302	0.000372337
1:Antistreptavidin IgG2 HC	48	W48+Oxidation	+Oxidation	1:G45-K65 = 2302.1230m(W48+Oxidation)	GLEWIGEISHSGTTNYNPSLK	6.59064e-05	9.29058e-05	9.29838e-05	9.9605e-05	9.75478e-05	0.000108254	9.93563e-05	0.000103464	0.000107819	0.000103383	0.000110049	0.000105697	9.23769e-05	7.57722e-05	0.000102286	0.000106514	0.000112676	0.000113937	0.000117307	9.89007e-05	0.000106214	0.000103687	0.000104137	0.000102834	9.91932e-05	9.6673e-05	9.38275e-05	0.000106619	8.76584e-05	0.000101774	8.62723e-05	0.000103886	0.000103183	6.53505e-05	0.000117737	0.000110682	7.14873e-05	7.13347e-05	7.35029e-05	7.64853e-05	7.51383e-05	7.45488e-05	8.41613e-05	7.58326e-05
1:Antistreptavidin IgG2 HC	55	S55+C-term clip	C-term Clip	1:G45-S55 = 1226.5932m[nonspecific]	GLEWIGEISHS	4.8546e-05	3.73505e-05	4.80984e-05	8.85545e-05	4.51942e-05	3.80358e-05	0.000104648	0.000158602	0.000137592	8.79036e-05	0.00011694	0.000121525	6.33991e-05	4.25819e-05	3.79932e-05	6.31262e-05	8.01092e-05	8.69905e-05	6.695e-05	8.80734e-05	4.89933e-05	7.81272e-05	7.8333e-05	6.22366e-05	8.48762e-05	5.89724e-05	5.92292e-05	0.00017078	0.000170386	0.000190984	6.63714e-05	8.78026e-05	6.90445e-05	9.05171e-05	8.07879e-05	7.79562e-05	4.9292e-05	2.47511e-06	4.41526e-06	2.32463e-05	1.90932e-05	5.21258e-05	1.28503e-05	3.52194e-05
1:Antistreptavidin IgG2 HC	56	G56(G56R)[GGG] (1 base change)	Sequence Variant (1 base change)	1:G45-G56 = 1283.6146m(G56R)	GLEWIGEISHSG	3.06494e-05	4.2104e-05	4.06485e-05	4.2902e-05	4.23812e-05	4.58887e-05	5.10054e-05	4.45431e-05	4.01453e-05	5.13526e-05	4.90442e-05	4.59679e-05	6.42715e-05	4.7839e-05	4.77625e-05	4.22677e-05	4.54115e-05	4.18098e-05	5.31947e-05	4.70172e-05	4.96574e-05	5.07029e-05	4.49601e-05	4.90235e-05	6.84453e-05	6.40165e-05	6.64623e-05	6.99633e-05	7.2296e-05	7.64384e-05	8.81396e-05	7.89221e-05	7.47025e-05	5.4207e-05	5.38427e-05	5.47249e-05	1.61546e-05	1.34684e-05	2.38056e-05	2.10854e-05	1.94106e-05	2.00739e-05	2.1607e-05	2.12988e-05
1:Antistreptavidin IgG2 HC	56	G56+N-term clip	N-term Clip	1:G56-K65 = 1093.5404m[nonspecific]	GTTNYNPSLK	7.41679e-05	8.72278e-05	7.91148e-05	9.1191e-05	7.7665e-05	8.05456e-05	0.000196323	0.000234388	0.000206431	0.000194447	0.000221701	0.000196485	0.000136844	0.00010906	8.11228e-05	0.000185661	0.000203184	0.000204013	0.000126634	0.000106282	0.000106916	0.000124644	0.000128387	0.000107767	9.89124e-05	8.15116e-05	6.25229e-05	0.00020505	0.000231023	0.000225187	0.000126641	0.000106183	0.00010519	7.97542e-05	0.000108898	0.00010774	6.28659e-05	4.95159e-05	4.80791e-05	0.00011584	0.000119412	0.000129611	7.13739e-05	7.35412e-05
1:Antistreptavidin IgG2 HC	59	N59(N59K)[AAC] (1 base change)	Sequence Variant (1 base change)	1:G45-N59 = 1599.7529m(N59K)	GLEWIGEISHSGTTN	6.8508e-05	8.60213e-05	7.38085e-05	7.6208e-05	7.43499e-05	8.17916e-05	7.57404e-05	7.67383e-05	7.89205e-05	7.9755e-05	7.33692e-05	7.47737e-05	9.90507e-05	7.64524e-05	7.89195e-05	8.30684e-05	8.49051e-05	8.9155e-05	8.88572e-05	7.67866e-05	8.03431e-05	8.66047e-05	8.4599e-05	8.03578e-05	0.000116465	0.000107462	9.86033e-05	0.000102797	8.39535e-05	9.95232e-05	0.000108127	0.000109728	0.000101009	4.97211e-05	8.52405e-05	8.28061e-05	3.40269e-05	3.02387e-05	3.43272e-05	3.54351e-05	3.39238e-05	3.54468e-05	3.67198e-05	3.94089e-05
1:Antistreptavidin IgG2 HC	65	K65+Glycation	+Glycation	1:G45-R67 = 2545.2561m(K65+Glycation)	GLEWIGEISHSGTTNYNPSLKSR	0.000308789	0.000383478	0.000360944	0.000369222	0.00037446	0.000414999	0.000451156	0.000440619	0.000448202	0.000462045	0.000404318	0.000492649	0.000404831	0.000283891	0.000370948	0.000455611	0.0004522	0.000454704	0.00039029	0.000365584	0.000413084	0.000400132	0.000374638	0.000378858	0.000413936	0.000357573	0.000355659	0.000469089	0.000388998	0.000469124	0.000323935	0.000365922	0.000384494	0.000169185	0.000397523	0.000387189	0.000170249	0.000161179	0.000173246	0.000219688	0.000215203	0.000223201	0.000219985	0.000195743
1:Antistreptavidin IgG2 HC	67	R67(R67Q)[CGA] (1 base change)	Sequence Variant (1 base change)	1:S66-K74 = 961.5193m(R67Q)	SRVTISGDK	7.29519e-05	8.81554e-05	7.76619e-05	8.3543e-05	8.81033e-05	6.9215e-05	7.36651e-05	7.66562e-05	6.62666e-05	6.69289e-05	7.08788e-05	7.38029e-05	8.89465e-05	6.52542e-05	8.44863e-05	0.000159315	7.1813e-05	7.56434e-05	6.76655e-05	7.14321e-05	7.86079e-05	8.47664e-05	7.65637e-05	0.000178932	6.12112e-05	6.26743e-05	6.80419e-05	7.50682e-05	6.32517e-05	5.96681e-05	6.23503e-05	6.03699e-05	6.00962e-05	6.34927e-05	7.08028e-05	7.946e-05	0.000257529	0.00020768	0.000187	7.31146e-05	9.24313e-05	9.63305e-05	0.000127306	8.64862e-05
1:Antistreptavidin IgG2 HC	68	V68(V68I)[GTC] (1 base change)	Sequence Variant (1 base change)	1:V68-K74 = 718.38612m(V68I)	VTISGDK	9.30746e-05	8.72497e-05	8.47996e-05	8.89177e-05	0.000103995	9.13902e-05	8.39036e-05	9.04355e-05	8.95451e-05	7.96279e-05	8.62558e-05	8.68305e-05	0.000112304	8.79372e-05	0.000107065	0.000180857	8.66092e-05	8.86168e-05	8.58112e-05	8.96194e-05	9.95403e-05	0.000103227	0.000102181	0.000216168	8.22473e-05	9.7359e-05	0.000108775	0.000101519	8.7433e-05	8.62078e-05	9.01398e-05	8.59383e-05	8.86693e-05	8.52103e-05	8.60487e-05	8.96487e-05	0.000262839	0.00018975	0.00018937	7.61368e-05	9.18219e-05	9.78272e-05	0.000122535	8.48868e-05
1:Antistreptavidin IgG2 HC	107	~T107+GalNAc-3SG	O-Glycan	1:N99-K117 = 2059.9851m(~T107+GalNAc-3SG)	NFDYWGQGTLVTVSSASTK	0.000219621	0.000287716	0.000271945	0.000312432	0.000269998	0.000341355	0.000264246	0.00015315	0.000228767	0.000234698	0.000239366	0.000203643	0.000120684	0.000531624	0.000337598	0.000261666	0.000214255	0.000222438	0.000228294	0.000255152	0.000320353	0.00028172	0.000262586	0.000288995	5.26894e-05	6.13075e-05	2.28914e-06	5.63709e-05	7.61649e-05	4.58816e-05	2.28787e-05	5.96621e-05	0.000107358	0.000163023	8.28457e-05	0.000125633	0.0001025	0.000137527	0.000134129	0.0001237	0.000128296	0.000128188	0.000124393	0.00012984
1:Antistreptavidin IgG2 HC	107	T107+N-term clip	N-term Clip	1:T107-K117 = 1092.6027m[nonspecific]	TLVTVSSASTK	3.56447e-05	4.74251e-05	3.00044e-05	5.12003e-05	3.03165e-05	1.10884e-05	0.000208527	0.000313477	0.000242265	0.000209591	0.000239238	0.000223057	0.000161548	3.74944e-05	4.56668e-05	0.000244057	0.000251487	0.000205377	5.96889e-05	3.63844e-05	5.8218e-05	0.000103311	0.000110822	7.42445e-05	2.62205e-05	4.21612e-05	3.42859e-05	0.000314202	0.000299782	0.000450603	5.07856e-05	5.98811e-05	5.01642e-05	9.8765e-05	8.07377e-05	6.89494e-05	1.77573e-05	1.42935e-05	8.70772e-06	5.90066e-05	6.01014e-05	6.93282e-05	1.94776e-05	1.89614e-05
1:Antistreptavidin IgG2 HC	117	K117+Hydroxylation	+Hydroxylation	1:N99-K117 = 2059.9851m(K117+Hydroxylation)	NFDYWGQGTLVTVSSASTK	0.043583	0.0503115	0.0466907	0.0450248	0.0450143	0.0477322	0.0480969	0.0456978	0.0458429	0.0440958	0.0449608	0.0441701	0.0596651	0.0487652	0.0467812	0.047163	0.0463297	0.0481247	0.0452258	0.0459115	0.0459887	0.0487347	0.0442419	0.0469572	0.041041	0.0440169	0.0357	0.0331469	0.041525	0.042966	0.0389247	0.0437433	0.040899	0.0390608	0.0428497	0.0412283	0.0479854	0.0501191	0.0490002	0.0505144	0.0510497	0.0512668	0.0478445	0.0488989
1:Antistreptavidin IgG2 HC	120	~S120+GalNAc-3SG	O-Glycan	1:G118-R129 = 1287.6282m(~S120+GalNAc-3SG)	GPSVFPLAPCSR	0.000104071	7.19541e-05	9.48231e-05	0.000104139	8.97361e-05	9.15438e-05	9.38058e-05	0.00011043	0.000102017	8.45241e-05	9.19249e-05	9.54633e-05	7.53552e-05	6.53357e-05	7.65515e-05	7.79267e-05	8.46889e-05	8.21274e-05	9.75852e-05	8.97027e-05	8.37694e-05	9.06286e-05	0.000108045	0.000108208	6.98422e-05	8.31947e-05	7.71754e-05	7.74037e-05	8.24184e-05	8.63143e-05	6.52533e-05	6.86716e-05	7.87671e-05	8.72156e-05	0.000104948	0.00012458	0.000132394	0.00015084	0.00015961	0.000143037	0.000145501	0.000160595	0.000146987	0.000126842
1:Antistreptavidin IgG2 HC	121	V121(V121I)[GTC] (1 base change)	Sequence Variant (1 base change)	1:G118-R129 = 1287.6282m(V121I)	GPSVFPLAPCSR	8.43098e-05	0.000101983	9.11422e-05	8.65405e-05	8.23556e-05	8.63428e-05	8.85408e-05	8.73268e-05	9.03432e-05	8.57613e-05	9.17313e-05	7.46098e-05	7.72697e-05	8.96162e-05	9.10816e-05	9.28379e-05	9.57674e-05	8.45397e-05	8.99288e-05	9.0216e-05	9.28615e-05	8.77074e-05	9.26574e-05	8.9999e-05	8.87101e-05	9.24105e-05	9.91685e-05	8.86682e-05	0.000104224	9.46258e-05	9.36024e-05	9.47016e-05	8.67281e-05	0.000104196	9.3573e-05	8.85324e-05	5.00586e-05	4.86855e-05	4.70553e-05	4.83276e-05	4.9095e-05	5.1912e-05	4.88499e-05	5.49842e-05
1:Antistreptavidin IgG2 HC	122	F122(F122Y)[TTC] (1 base change)	Sequence Variant (1 base change)	1:G118-R129 = 1287.6282m(F122Y)	GPSVFPLAPCSR	6.76002e-05	8.24702e-05	7.55267e-05	7.95466e-05	8.30128e-05	9.42658e-05	9.6183e-05	9.62187e-05	9.40876e-05	9.48506e-05	0.000100429	9.3851e-05	8.95586e-05	8.88502e-05	7.57297e-05	0.000104517	0.000102946	0.000100308	9.09725e-05	8.24954e-05	9.23086e-05	8.31971e-05	9.54232e-05	9.5776e-05	6.83161e-05	8.22513e-05	7.66084e-05	8.88634e-05	0.000105048	9.86035e-05	8.69643e-05	8.1666e-05	8.18237e-05	5.1043e-05	9.5394e-05	9.21577e-05	4.90474e-05	5.06894e-05	5.51447e-05	6.17431e-05	6.71073e-05	6.88031e-05	5.9083e-05	5.8435e-05
1:Antistreptavidin IgG2 HC	127	C127+C-term clip	C-term Clip	1:G118-C127 = 1044.4950m[nonspecific]	GPSVFPLAPC	8.36015e-05	0.000496487	8.72917e-05	0.000336596	0.000292604	8.19806e-05	0.000471448	0.00052149	0.000450203	0.000639335	0.000676283	0.000451051	0.000426006	0.000148027	0.000138644	0.000448217	0.000423772	0.000423641	0.000278519	0.000296427	0.000152739	0.000215444	0.000237951	0.000187315	7.67689e-05	7.24557e-05	9.14464e-05	0.000454228	0.000791858	0.000627739	0.000141337	0.00015463	0.000153144	0.000201157	0.000124751	0.000196556	0.000166877	3.73046e-05	6.25527e-05	0.000193766	0.000208196	0.000208358	0.000110438	0.000130326
1:Antistreptavidin IgG2 HC	127	C127(C127Y)[TGC] (1 base change)	Sequence Variant (1 base change)	1:G118-R129 = 1287.6282m(C127Y)	GPSVFPLAPCSR	3.32174e-05	3.11406e-05	3.1964e-05	3.5458e-05	2.89326e-05	2.93048e-05	3.33542e-05	4.35047e-05	3.83123e-05	2.91842e-05	3.38698e-05	3.25434e-05	3.21104e-05	2.9252e-05	2.87811e-05	2.38205e-05	2.47631e-05	2.55523e-05	2.95141e-05	2.76673e-05	2.81704e-05	2.79385e-05	2.97489e-05	2.46387e-05	4.73804e-05	4.44417e-05	5.39731e-05	4.54994e-05	4.96301e-05	4.73972e-05	4.46876e-05	5.10012e-05	4.96263e-05	5.17899e-05	4.67579e-05	5.01212e-05	1.93628e-05	1.1443e-05	1.08258e-05	1.0915e-05	1.16026e-05	1.01377e-05	1.27522e-05	1.23526e-05
1:Antistreptavidin IgG2 HC	129	R129(R129K)[AGG] (1 base change)	Sequence Variant (1 base change)	1:G118-R129 = 1287.6282m(R129K)	GPSVFPLAPCSR	6.52752e-05	7.41133e-05	6.96506e-05	6.27391e-05	6.61001e-05	6.95661e-05	6.98052e-05	6.75827e-05	6.70197e-05	7.07437e-05	7.15769e-05	6.93356e-05	7.00216e-05	6.67362e-05	7.10545e-05	6.91486e-05	7.36323e-05	6.88379e-05	7.6944e-05	4.17881e-05	7.68392e-05	6.82398e-05	6.69365e-05	7.30381e-05	7.26983e-05	7.03601e-05	6.59307e-05	6.70374e-05	7.92627e-05	8.35602e-05	6.75706e-05	7.66989e-05	7.71459e-05	4.73126e-05	7.4847e-05	6.65793e-05	3.90874e-05	3.78961e-05	3.99627e-05	3.50927e-05	3.89243e-05	4.11787e-05	4.0646e-05	4.09143e-05
1:Antistreptavidin IgG2 HC	131	T131+N-term clip	N-term Clip	1:T131-K143 = 1336.6544m[nonspecific]	TSESTAALGCLVK	8.56171e-05	9.40187e-05	9.03625e-05	0.00010293	0.000109976	7.50847e-05	0.000487489	0.000511999	0.00053401	0.000516066	0.000540663	0.000796037	0.000117717	8.01338e-05	0.000104191	0.000504052	0.00049867	0.00051778	0.000138969	0.000147194	0.000125738	0.0001725	0.000185853	0.000176641	8.80313e-05	8.16119e-05	6.83785e-05	0.000513451	0.000501094	0.000448933	0.000109318	0.000117962	0.000126516	0.000180043	0.000158083	0.000157061	6.12167e-05	5.33946e-05	6.62726e-05	0.000286729	0.000321227	0.000294253	8.58187e-05	9.61078e-05
1:Antistreptavidin IgG2 HC	132	S132+N-term clip	N-term Clip	1:S132-K143 = 1235.6068m[nonspecific]	SESTAALGCLVK	0.000363259	0.000423155	0.000372073	0.000388403	0.000384175	0.000332653	0.00243212	0.00257354	0.00262051	0.00261457	0.00263897	0.00284535	0.000412184	0.000339354	0.000377898	0.00241265	0.00249788	0.00259322	0.000633081	0.0006015	0.000620688	0.000868364	0.000840055	0.000867936	0.000512592	0.000391834	0.000373055	0.00245937	0.00240351	0.00186302	0.000455151	0.000500161	0.0005075	0.000736492	0.000815068	0.000715869	0.000257231	0.00026152	0.000286156	0.00184174	0.00196601	0.0018219	0.000496282	0.000453949
1:Antistreptavidin IgG2 HC	134	S134(S134N)[AGC] (1 base change)	Sequence Variant (1 base change)	1:S130-K143 = 1423.6865m(S134N)	STSESTAALGCLVK	0.000279328	0.000254318	0.000239622	0.000251709	0.000270741	0.000233716	0.000255587	0.000270037	0.000262146	0.000276945	0.000280747	0.000284569	0.000252445	0.000317568	0.000257483	0.000268724	0.000279011	0.000284136	0.000274459	0.000262309	0.000276209	0.000270197	0.000269556	0.000281543	0.00026055	0.000251847	0.00025606	0.000262015	0.000259572	0.000228372	0.000199104	0.000244122	0.000233242	0.000280906	0.000280686	0.000278095	0.000167248	0.000170873	0.000182679	0.000173365	0.000182255	0.000181359	0.000189521	0.000189771
1:Antistreptavidin IgG2 HC	134	S134+N-term clip	N-term Clip	1:S134-K143 = 1019.5321m[nonspecific]	STAALGCLVK	0.000462103	0.000468894	0.000408905	0.00041862	0.000418347	0.000410942	0.00295047	0.00290101	0.00312136	0.00302526	0.00308404	0.0029912	0.000530679	0.000569181	0.000478254	0.00297588	0.00302483	0.00304743	0.000752784	0.000665813	0.000705124	0.000992544	0.000981969	0.000983666	0.000515281	0.000476204	0.000435304	0.00342373	0.00406893	0.00321947	0.000726178	0.000818458	0.000741777	0.00150228	0.000911488	0.000873017	0.000186916	0.0002003	0.000206979	0.00132127	0.00145961	0.00144588	0.000334173	0.000346773
1:Antistreptavidin IgG2 HC	135	T135+N-term clip	N-term Clip	1:T135-K143 = 932.5001m[nonspecific]	TAALGCLVK	0.000152571	0.00011284	0.000106423	0.00013512	0.00010181	9.96924e-05	0.00052032	0.00061595	0.000548045	0.00051933	0.000512728	0.000544538	0.00022738	0.000168215	0.000116149	0.00050807	0.000532305	0.000509381	0.000185103	0.000164999	0.000149976	0.000216645	0.000222652	0.000188819	0.000113252	0.000111803	9.88472e-05	0.000638166	0.000715913	0.000598356	0.000128331	0.000162503	0.000148635	0.000294805	0.000168148	0.000158372	6.806e-05	5.18118e-05	4.91502e-05	0.000229568	0.000253413	0.000243879	8.70848e-05	8.40819e-05
1:Antistreptavidin IgG2 HC	136	A136(A136T)[GCG] (1 base change)	Sequence Variant (1 base change)	1:S130-K143 = 1423.6865m(A136T)	STSESTAALGCLVK	3.16933e-05	3.11014e-05	3.18696e-05	3.02157e-05	3.39103e-05	3.59449e-05	3.36512e-05	3.66282e-05	4.14562e-05	3.44142e-05	3.57041e-05	3.66649e-05	3.19527e-05	2.83013e-05	3.83332e-05	2.71746e-05	3.87942e-05	3.91539e-05	3.57189e-05	3.13842e-05	3.94834e-05	3.42336e-05	4.0832e-05	3.63069e-05	3.29846e-05	3.29102e-05	3.53285e-05	3.93734e-05	3.06e-05	3.46041e-05	3.63481e-05	3.74084e-05	3.9004e-05	4.0593e-05	4.40065e-05	3.98295e-05	2.08928e-05	2.37658e-05	2.36797e-05	2.47836e-05	2.37836e-05	2.1514e-05	2.74179e-05	2.43895e-05
1:Antistreptavidin IgG2 HC	140	C140(C140Y)[TGC] (1 base change)	Sequence Variant (1 base change)	1:S130-K143 = 1423.6865m(C140Y)	STSESTAALGCLVK	0.000221345	0.000212757	0.0002077	0.000210836	0.000207962	0.000195618	0.000185878	0.000188762	0.000194161	0.000191271	0.000196228	0.000196697	0.000207284	0.000175559	0.00019656	0.00018826	0.000179271	0.000177056	0.000196582	0.000190408	0.000195617	0.000201926	0.000191261	0.000193215	0.000216942	0.000235018	0.000213572	0.000200913	0.000222044	0.000207868	0.000181822	0.000219476	0.000199273	0.000293012	0.000226161	0.000214765	0.000114794	0.000120251	0.00013946	0.000131708	0.000136069	0.000133942	0.000139069	0.000144683
1:Antistreptavidin IgG2 HC	142	V142(V142I)[GTC] (1 base change)	Sequence Variant (1 base change)	1:S130-K143 = 1423.6865m(V142I)	STSESTAALGCLVK	4.85936e-05	5.59083e-05	4.93642e-05	4.60035e-05	5.08374e-05	4.52367e-05	5.15157e-05	4.77053e-05	4.93828e-05	5.26974e-05	5.15809e-05	5.74843e-05	4.31316e-05	3.34229e-05	5.50502e-05	5.24523e-05	4.97343e-05	5.00925e-05	5.24045e-05	4.90139e-05	5.20939e-05	5.00391e-05	5.00721e-05	4.95963e-05	6.32256e-05	5.12492e-05	4.65573e-05	5.58568e-05	4.91134e-05	5.3828e-05	3.63097e-05	5.32373e-05	5.69026e-05	5.37505e-05	5.33969e-05	5.14315e-05	2.96631e-05	2.97999e-05	3.40563e-05	3.41074e-05	3.37689e-05	3.39593e-05	3.53845e-05	3.3935e-05
1:Antistreptavidin IgG2 HC	154	~W154+Double Oxidation	+Double Oxidation	1:D144-K206 = 6763.2341m(~W154+Double Oxidation)	DYFPEPVTVSWNSGALTSGVHTFPAVLQSSGLYSLSSVVTVPSSNFGTQTYTCNVDHKPSNTK	0.000983652	0.00072434	0.000900153	0.000691984	0.00083454	0.000944143	0.000718983	0.000615552	0.000489372	0.000733433	0.000932175	0.000599716	0.00117678	0.00106936	0.00146953	0.000997595	0.00129489	0.00168806	0.00131654	0.00150469	0.00132151	0.00106818	0.000987913	0.000894166	0.00277207	0.00197395	0.00173364	0.00234132	0.0013429	0.00187986	0.00136256	0.00138639	0.00144898	0.00155798	0.000685699	0.00151047	0.00158037	0.00112898	0.0010604	0.00148936	0.0013699	0.000793444	0.0013941	0.00144555
1:Antistreptavidin IgG2 HC	154	W154+Oxidation	+Oxidation	1:D144-K206 = 6763.2341m(W154+Oxidation)	DYFPEPVTVSWNSGALTSGVHTFPAVLQSSGLYSLSSVVTVPSSNFGTQTYTCNVDHKPSNTK	0.0147141	0.0115839	0.00999907	0.0148351	0.0150849	0.0138791	0.0147017	0.0165798	0.0163861	0.0153157	0.0167588	0.0168461	0.0107787	0.0130595	0.0144896	0.0151118	0.0154356	0.0171616	0.0139161	0.0157923	0.0154119	0.0160086	0.0157549	0.0165783	0.014349	0.0176721	0.0154678	0.018226	0.0159971	0.0155675	0.015515	0.0151355	0.0164959	0.0187311	0.011136	0.0180391	0.0144226	0.0130622	0.0144744	0.0130871	0.0152609	0.0148519	0.0149016	0.0140818
1:Antistreptavidin IgG2 HC	155	N155(N155K)[AAC] (1 base change)	Sequence Variant (1 base change)	1:D144-N155 = 1452.6561m(N155K)	DYFPEPVTVSWN	9.63587e-05	0.000109929	0.000112711	9.36143e-05	0.000125018	0.000100952	0.000165977	0.000161043	0.000118028	0.0001399	0.000112671	0.000100193	9.6939e-05	0.000178094	0.000150043	0.00015259	0.000135667	0.000134691	0.000164248	0.000165413	0.000154945	0.000160167	0.000145056	0.000135973	0.000379895	0.000215449	0.00023454	0.00042464	0.000245264	0.000177781	0.000247364	0.000357449	0.000367283	0.000184024	0.000300794	0.000387566	4.82779e-05	4.77262e-05	4.34934e-05	2.40439e-05	5.9325e-05	5.22081e-05	4.45876e-05	4.88362e-05
1:Antistreptavidin IgG2 HC	158	A158+N-term clip	N-term Clip	1:A158-K206 = 5184.5350m[nonspecific]	ALTSGVHTFPAVLQSSGLYSLSSVVTVPSSNFGTQTYTCNVDHKPSNTK	9.17805e-05	2.29719e-05	4.7342e-05	2.72618e-05	5.3312e-05	1.85732e-05	0.000160174	0.000281301	0.000130966	0.000143822	0.000132661	0.000110405	0.000112548	2.96985e-05	2.31659e-05	0.000111266	9.78787e-05	3.52572e-05	7.96663e-05	4.48351e-05	3.36729e-05	7.51366e-05	6.63703e-05	3.61401e-05	2.10767e-05	2.27881e-05	5.80794e-05	2.42263e-05	9.65042e-05	2.67601e-05	1.05707e-05	4.53585e-05	2.82218e-05	0.000144354	6.01448e-05	5.75971e-05	9.21075e-05	3.74284e-05	4.75131e-05	0.000106049	8.53263e-05	8.92791e-05	7.37735e-05	8.88268e-05
1:Antistreptavidin IgG2 HC	160	T160+C-term clip	C-term Clip	1:D144-T160 = 1881.8785m[nonspecific]	DYFPEPVTVSWNSGALT	2.17607e-05	7.93329e-06	1.48908e-05	4.86908e-05	2.08317e-05	1.27596e-05	0.000133742	0.000168882	0.000129798	0.000134105	0.000115581	0.000222541	4.79725e-05	3.1143e-05	1.23292e-05	0.00011874	0.000133296	0.00013995	4.73769e-05	6.44474e-05	2.45262e-05	5.9651e-05	6.03147e-05	4.28021e-05	0.00202058	5.84847e-05	2.63795e-05	0.000287066	0.000295889	0.000267498	8.65145e-05	6.44934e-05	6.30785e-05	8.48745e-05	0.000209598	0.000173856	2.59644e-05	1.44643e-05	1.47425e-05	6.14022e-05	6.20743e-05	6.88763e-05	3.04292e-05	3.04686e-05
1:Antistreptavidin IgG2 HC	161	S161+N-term clip	N-term Clip	1:S161-K206 = 4899.3661m[nonspecific]	SGVHTFPAVLQSSGLYSLSSVVTVPSSNFGTQTYTCNVDHKPSNTK	0.000205076	0.000123961	0.000176309	0.000240576	0.0001952	8.24934e-05	0.000442859	0.00071181	0.000552736	0.000460966	0.000420282	0.000743731	0.000110372	0.000124082	0.000106349	0.000433265	0.000462991	0.000411984	0.000247547	0.000349583	0.000159291	0.000261832	0.000243569	0.00020075	0.00478443	0.000198226	0.000100832	0.000454739	0.000461033	0.000403161	0.000176272	0.000206623	0.000176847	0.000118734	0.000234585	0.00029943	0.000161394	8.25113e-05	5.90617e-05	0.000218543	0.000235356	0.000211611	0.000122272	0.00014922
1:Antistreptavidin IgG2 HC	191	T191+N-term clip	N-term Clip	1:T191-K206 = 1893.8527m[nonspecific]	TQTYTCNVDHKPSNTK	0.000171866	0.000240706	0.000253925	0.000239101	0.000265156	0.000229925	0.0019787	0.00220759	0.00197561	0.00208475	0.0016443	0.00172043	0.000379199	0.000274303	0.000323962	0.00209974	0.00228892	0.0021685	0.00064455	0.000549745	0.000520648	0.000703427	0.000835421	0.000651433	0.00119973	0.000616866	0.000379704	0.00753713	0.00429253	0.00391605	0.00131308	0.00130166	0.00102547	0.0009308	0.00102101	0.00146593	4.34176e-05	4.2555e-05	4.89661e-05	0.000351332	0.000386734	0.00038039	9.20021e-05	9.03837e-05
1:Antistreptavidin IgG2 HC	199	D199+H2O loss	+H2O loss	1:D144-K206 = 6763.2341m(D199+H2O loss)	DYFPEPVTVSWNSGALTSGVHTFPAVLQSSGLYSLSSVVTVPSSNFGTQTYTCNVDHKPSNTK	0.00568286	0.00409376	0.00460702	0.00570975	0.00614643	0.00553798	0.00584714	0.00651503	0.00664359	0.00665487	0.00689092	0.00674696	0.00315343	0.00582579	0.0070407	0.00664603	0.00614286	0.00663928	0.00713213	0.00697268	0.0062757	0.00712597	0.00662553	0.0066923	0.00510861	0.00616116	0.00501924	0.00755124	0.00605684	0.00630429	0.00559814	0.00586588	0.00634495	0.0070808	0.00762767	0.00699791	0.00526011	0.00523229	0.00571268	0.00535046	0.00599985	0.00579087	0.00574673	0.00594521
1:Antistreptavidin IgG2 HC	238	K238+Glycation	+Glycation	1:C215-K240 = 2911.3305m(K238+Glycation)	CCVECPPCPAPPVAGPSVFLFPPKPK	0.000871095	0.000752019	0.000961746	0.00105227	0.000967368	0.00098316	0.00341373	0.00305576	0.00341355	0.00337687	0.00325721	0.00336714	0.000820488	0.000814823	0.00107018	0.00342725	0.00355457	0.00345054	0.00147831	0.0014277	0.0013827	0.00156274	0.00143371	0.0016949	0.000956731	0.000946026	0.000973091	0.00271902	0.00268606	0.00322539	0.00110727	0.00125858	0.00121066	0.00162103	0.00144623	0.00173876	0.000868179	0.000967989	0.000925205	0.00269906	0.00267785	0.00280392	0.00120311	0.00110683
1:Antistreptavidin IgG2 HC	240	K240+Glycation	+Glycation	1:P239-R247 = 1059.5747m(K240+Glycation)	PKDTLMISR	0.00105416	0.00136429	0.00122647	0.0011032	0.00136214	0.00146761	0.00440134	0.0023869	0.00409333	0.0047116	0.00484976	0.00385963	0.00078684	0.00150759	0.00149721	0.00483354	0.0047204	0.00484684	0.0015603	0.0016318	0.0018334	0.00201257	0.00169214	0.00223771	0.000821269	0.000620324	0.000517789	0.00274302	0.00307482	0.00247912	0.00115218	0.00117955	0.0010908	0.00128158	0.00132344	0.00142443	0.000249231	0.000595842	0.000723548	0.0025052	0.00243603	0.00252021	0.000665736	0.000623375
1:Antistreptavidin IgG2 HC	241	D241+H2O loss	Artifact-Detection	1:D241-R247 = 834.42694m(D241+H2O loss)	DTLMISR	0.00405426	0.00446485	0.00505216	0.0044568	0.00448671	0.00456015	0.00398871	0.0044037	0.00476527	0.00488386	0.00498286	0.00501714	0.00428491	0.00388133	0.00451315	0.00511783	0.00420333	0.00443782	0.00452625	0.00413587	0.00471909	0.00413812	0.00407364	0.00435434	0.00417836	0.0045527	0.00407344	0.00395052	0.00351811	0.00377356	0.00405102	0.00446114	0.00385005	0.00386174	0.00485439	0.00540636	0.019066	0.0194186	0.0202978	0.0199224	0.0201634	0.0212335	0.0207435	0.0211736
1:Antistreptavidin IgG2 HC	244	M244+Double Oxidation	+Double Oxidation	1:D241-R247 = 834.4269m(M244+Double Oxidation)	DTLMISR	2.56195e-05	2.43979e-05	2.30603e-05	2.68988e-05	1.74006e-05	2.70554e-05	3.55236e-05	4.00156e-05	4.38886e-05	4.04493e-05	3.39414e-05	4.39093e-05	2.63445e-05	3.24548e-05	3.26378e-05	4.15705e-05	4.68558e-05	4.21807e-05	2.62556e-05	3.13243e-05	2.67956e-05	2.9471e-05	2.74095e-05	2.6481e-05	3.06337e-05	3.00909e-05	3.4192e-05	5.61574e-05	5.27262e-05	5.73641e-05	3.42531e-05	3.36387e-05	3.6364e-05	3.77362e-05	2.90045e-05	2.90066e-05	1.00795e-05	5.52974e-06	7.43368e-06	2.38987e-05	2.05091e-05	2.46986e-05	1.14946e-05	6.86143e-06
1:Antistreptavidin IgG2 HC	244	M244+Oxidation	+Oxidation	1:D241-R247 = 834.4269m(M244+Oxidation)	DTLMISR	0.0181451	0.0203881	0.0195532	0.0190087	0.0192003	0.0187459	0.0341814	0.0348104	0.0348937	0.0339152	0.0341342	0.0347053	0.0207846	0.0178071	0.0206253	0.0350384	0.0359863	0.035802	0.022712	0.0217043	0.0222252	0.023461	0.0236767	0.0230737	0.0208103	0.0194924	0.0190893	0.0356798	0.0363985	0.0375959	0.024648	0.0204876	0.0233497	0.023129	0.0248852	0.0245352	0.0151289	0.0155432	0.015933	0.0319844	0.0338066	0.0339461	0.0196703	0.0188277
1:Antistreptavidin IgG2 HC	244	M244(M244I)[ATG] (1 base change)	Sequence Variant (1 base change)	1:D241-R247 = 834.4269m(M244I)	DTLMISR	0.000125547	0.000126305	0.000125651	0.00013328	0.000137335	0.00013489	0.000129199	0.000138115	0.000132546	0.000125049	0.000122489	0.000133494	0.000121368	0.000125481	0.000135764	0.000139363	0.00013074	0.000130883	0.000136699	0.000127396	0.00014148	0.000132434	0.000132749	0.000128845	0.000146853	0.000133994	0.000126797	0.000139826	0.000149121	0.000149819	0.000130902	0.000148217	0.000141787	0.000140834	0.000140413	0.000129084	6.36445e-05	7.14517e-05	7.70075e-05	6.78186e-05	8.93573e-05	7.95988e-05	8.83337e-05	8.2434e-05
1:Antistreptavidin IgG2 HC	259	S259(S259R)[AGC] (1 base change)	Sequence Variant (1 base change)	1:T248-S259 = 1304.6170m(S259R)	TPEVTCVVVDVS	0.000149139	0.000235252	0.000201223	0.000146362	0.000142832	0.00016603	0.000223424	0.000183156	0.00017633	0.000175389	0.00016269	0.000219163	0.000195441	0.000221215	0.000209619	0.000194448	0.000255535	0.000233968	0.000220746	0.000226414	0.000232844	0.000183149	0.000228778	0.000195733	0.000267454	0.000158971	0.000136674	0.000259654	0.000116421	0.000177314	0.000173517	0.000172796	0.000134405	3.97631e-05	0.000135921	0.000115428	0.000133357	0.000101744	0.000103296	0.000107081	9.95036e-05	0.000116277	0.000106126	0.000110579
1:Antistreptavidin IgG2 HC	262	D262+C-term clip	C-term Clip	1:T248-D262 = 1685.7454m[nonspecific]	TPEVTCVVVDVSHED	0.0022359	0.00439206	0.0043473	0.00462296	0.00504397	0.00586166	0.0100417	0.00956882	0.00983149	0.00983928	0.00989646	0.0129083	0.00224554	0.00546591	0.00544515	0.00860618	0.0115431	0.0118313	0.00860511	0.0103624	0.00991261	0.00825287	0.0104725	0.00918419	0.00291561	0.00302186	0.00268172	0.00855178	0.00463052	0.00671528	0.00524942	0.00441199	0.00355403	0.00310593	0.00493046	0.00460984	0.00267489	0.00354226	0.0042012	0.00688748	0.00759764	0.00825269	0.00651367	0.00662782
1:Antistreptavidin IgG2 HC	268	N268(N268K)[AAC] (1 base change)	Sequence Variant (1 base change)	1:T248-N268 = 2400.0791m(N268K)	TPEVTCVVVDVSHEDPEVQFN	0.000952358	0.000620472	0.00047098	0.000370004	0.00058008	0.000838323	0.000823129	0.000569396	0.000337426	0.000452193	0.000348935	0.000759538	0.000844124	0.000819108	0.000331244	0.000482664	0.000650794	0.000642162	0.000537549	0.000476693	0.000903019	0.000391219	0.00040552	0.000719337	0.00066473	0.000281222	0.000509917	0.000962589	0.000297022	0.000397503	0.000420588	0.000292766	0.00040634	0.000218245	0.000303763	0.000396085	0.00100439	0.000980685	0.000976148	0.000879934	0.000824038	0.00115586	0.00107581	0.000798893
1:Antistreptavidin IgG2 HC	269	W269+Double Oxidation	+Double Oxidation	1:T248-K280 = 3797.7519m(W269+Double Oxidation)	TPEVTCVVVDVSHEDPEVQFNWYVDGVEVHNAK	0.000384548	0.000336589	0.000447315	0.000304638	0.000406434	0.000379285	0.000371066	0.000262216	0.000218288	0.000306803	0.000391192	0.000429471	0.000368536	0.000436647	0.000755003	0.000563921	0.000664504	0.000540758	0.000785082	0.000851325	0.000659049	0.000413162	0.000415485	0.000519386	0.000639517	0.000680839	0.000529647	0.000819036	0.000372607	0.000434336	0.000585491	0.000502315	0.000445347	0.000700998	0.00034349	0.000471855	0.000810167	0.000662544	0.000584873	0.000631941	0.000607728	0.000544063	0.000639437	0.000761142
1:Antistreptavidin IgG2 HC	280	~K280+Glycation	+Glycation	1:T248-R284 = 4280.0484m(~K280+Glycation)	TPEVTCVVVDVSHEDPEVQFNWYVDGVEVHNAKTKPR	0.00457842	0.00657629	0.00446065	0.00548751	0.0044761	0.00380802	0.0118944	0.0124097	0.0124584	0.0130064	0.0117892	0.0127462	0.00381857	0.00903854	0.00495391	0.0101764	0.0138081	0.0122778	0.00661994	0.00728281	0.0062655	0.00561319	0.00699375	0.00562672	0.00262173	0.00252463	0.00209498	0.0100516	0.00617581	0.00616228	0.00374884	0.00329437	0.00249046	0.0016891	0.0028861	0.0029378	0.00254537	0.00206453	0.00211624	0.00489456	0.00575788	0.00572006	0.00317222	0.00277102
1:Antistreptavidin IgG2 HC	289	N289+A1G0	N-Glycan	1:E285-R293 = 1156.5149m(N289+A1G0)	EEQFNSTFR	0.00320377	0.00326143	0.0032082	0.00335826	0.00328488	0.00322929	0.00325571	0.00303061	0.00320942	0.00325437	0.00323453	0.00324194	0.00352382	0.00286383	0.0030513	0.00322192	0.00314464	0.00321751	0.00313413	0.0032363	0.00318649	0.0034784	0.00316723	0.00329319	0.00323547	0.00325795	0.00301687	0.00320252	0.00297334	0.003231	0.00337362	0.00310815	0.00300723	0.00316901	0.00344896	0.00342885	0.00378858	0.00376076	0.00369571	0.00382542	0.00375597	0.00386383	0.00393334	0.0039284
1:Antistreptavidin IgG2 HC	289	N289+A1G0F	N-Glycan	1:E285-R293 = 1156.5149m(N289+A1G0F)	EEQFNSTFR	0.0110895	0.0109583	0.0115449	0.0105052	0.011972	0.0111726	0.0116055	0.0115303	0.0116294	0.0112595	0.0117723	0.0119744	0.0118206	0.0117878	0.0123453	0.0117943	0.0114421	0.0110825	0.0114544	0.0110132	0.0112522	0.010812	0.0117174	0.0112672	0.0132841	0.0130838	0.0130884	0.0125032	0.0135011	0.0135161	0.0122285	0.012563	0.0134831	0.012976	0.011362	0.0112903	0.00440898	0.00459453	0.0048122	0.00437498	0.00449462	0.00501778	0.0046655	0.00474526
1:Antistreptavidin IgG2 HC	289	N289+A1G0M4	N-Glycan	1:E285-R293 = 1156.5149m(N289+A1G0M4)	EEQFNSTFR	0.000572456	0.000599049	0.000558437	0.000584089	0.000497876	0.000528786	0.000588254	0.000571337	0.000583368	0.00067734	0.000538585	0.000598098	0.000607938	0.000367631	0.000582153	0.000606657	0.000571746	0.000563852	0.000639263	0.000607285	0.000550801	0.000551055	0.000567722	0.000638129	0.000598967	0.000677917	0.000285793	0.000448509	0.000477588	0.000554079	0.000435158	0.000547282	0.00056261	0.000327453	0.000608222	0.000614058	0.000697089	0.000757187	0.000877612	0.000772995	0.000760347	0.000807351	0.000776637	0.000719274
1:Antistreptavidin IgG2 HC	289	N289+A1G0M5	N-Glycan	1:E285-R293 = 1156.5149m(N289+A1G0M5)	EEQFNSTFR	0.00124596	0.0011986	0.00122276	0.00102199	0.00121109	0.00121602	0.00109836	0.00121892	0.00113607	0.00120267	0.00112709	0.0011638	0.00118665	0.0010127	0.00129443	0.00118406	0.00129743	0.00123754	0.00128076	0.00119344	0.00124098	0.00124525	0.00125059	0.0011812	0.0010302	0.00108695	0.000945053	0.000892397	0.00104679	0.00115888	0.00109459	0.00114042	0.00121871	0.00113208	0.00124941	0.00119971	0.00133898	0.00125497	0.00115255	0.00122082	0.001236	0.00113134	0.00122316	0.00127838
1:Antistreptavidin IgG2 HC	289	N289+A1G0M5F	N-Glycan	1:E285-R293 = 1156.5149m(N289+A1G0M5F)	EEQFNSTFR	0.00101192	0.00107013	0.000980789	0.000951378	0.00105915	0.00116334	0.0010672	0.00104701	0.000999802	0.00104845	0.00100328	0.000980353	0.00109985	0.000980372	0.00109727	0.00108629	0.0010472	0.00104114	0.00114909	0.00106556	0.00106252	0.000980606	0.000951229	0.0010031	0.000982939	0.000974133	0.00102026	0.00103922	0.000948356	0.000994111	0.00100654	0.00110598	0.00103677	0.000887203	0.00102633	0.000978502	0.000971247	0.00101914	0.000917867	0.0010013	0.00102194	0.00101907	0.000987909	0.00105193
1:Antistreptavidin IgG2 HC	289	N289+A1G1	N-Glycan	1:E285-R293 = 1156.5149m(N289+A1G1)	EEQFNSTFR	0.00247162	0.00244575	0.00247571	0.00258556	0.0023028	0.00248392	0.00244605	0.00245521	0.00248813	0.00251136	0.00249969	0.00221895	0.0024336	0.00252467	0.00244823	0.00241719	0.00241132	0.00249423	0.00258322	0.00244738	0.00254659	0.00238428	0.00247817	0.00249009	0.00252788	0.00245997	0.00251982	0.00258891	0.00247792	0.00270055	0.00268558	0.00258839	0.00232845	0.00289663	0.00246145	0.00257934	0.00214874	0.00214543	0.00215484	0.00220658	0.00208808	0.00219161	0.00227008	0.00217313
1:Antistreptavidin IgG2 HC	289	N289+A1G1F	N-Glycan	1:E285-R293 = 1156.5149m(N289+A1G1F)	EEQFNSTFR	0.0348498	0.0338238	0.0346989	0.0352038	0.0346849	0.0347476	0.0349355	0.0346141	0.0346858	0.0336823	0.0343213	0.0339568	0.0337847	0.0354246	0.0343799	0.0349318	0.0337566	0.0340555	0.0330085	0.034084	0.0342057	0.0349471	0.0341885	0.0349311	0.0342114	0.0358292	0.0364071	0.03562	0.036073	0.0348407	0.0341129	0.0352008	0.0377882	0.0362918	0.0345128	0.0351496	0.0358066	0.035763	0.0359845	0.0357164	0.0350387	0.035711	0.0348098	0.0365591
1:Antistreptavidin IgG2 HC	289	N289+A1G1M4	N-Glycan	1:E285-R293 = 1156.5149m(N289+A1G1M4)	EEQFNSTFR	0.00241281	0.00254382	0.00240168	0.00229936	0.00246245	0.00256682	0.00244813	0.00241607	0.00246162	0.00250059	0.00250181	0.00243516	0.00258812	0.00211834	0.00257751	0.00250739	0.00250844	0.00249497	0.00280796	0.00250246	0.00250672	0.00249665	0.00260438	0.00244631	0.0025225	0.00247666	0.00237133	0.00232328	0.00246051	0.00257962	0.00261852	0.00253615	0.00271042	0.00207554	0.00251393	0.00254676	0.00202607	0.0020389	0.00208948	0.00201048	0.00206865	0.00200495	0.00213054	0.00207918
1:Antistreptavidin IgG2 HC	289	N289+A1G1M4F	N-Glycan	1:E285-R293 = 1156.5149m(N289+A1G1M4F)	EEQFNSTFR	0.00914736	0.00943513	0.00921293	0.00949309	0.00931592	0.00958699	0.00955767	0.00940382	0.00951431	0.00926609	0.00928727	0.00902653	0.0098771	0.00945719	0.00936676	0.00944982	0.00935714	0.00956192	0.0094119	0.00919771	0.00948526	0.00944794	0.00925276	0.00907907	0.00979556	0.00937972	0.00862169	0.00987993	0.0091974	0.00946498	0.00952502	0.00952544	0.00870522	0.0102884	0.00907494	0.00935194	0.00932255	0.0095586	0.0092775	0.0099104	0.00971075	0.00936672	0.00965517	0.00940592
1:Antistreptavidin IgG2 HC	289	N289+A1G1M5	N-Glycan	1:E285-R293 = 1156.5149m(N289+A1G1M5)	EEQFNSTFR	0.00725278	0.00705961	0.00708305	0.0063189	0.00686705	0.00754265	0.00654176	0.00710185	0.00708574	0.00706707	0.00663967	0.00718605	0.00766918	0.00580352	0.00796398	0.00703842	0.00748033	0.00722844	0.00778807	0.00711669	0.00701874	0.00719862	0.00742326	0.00705263	0.00630291	0.00604737	0.00561766	0.00512405	0.00624045	0.00718843	0.00625044	0.00683107	0.0063984	0.0061832	0.00727566	0.00715375	0.0075368	0.0072285	0.00715106	0.00745765	0.00772398	0.00702065	0.00756628	0.00728068
1:Antistreptavidin IgG2 HC	289	N289+A1G1M5F	N-Glycan	1:E285-R293 = 1156.5149m(N289+A1G1M5F)	EEQFNSTFR	0.00911929	0.0094712	0.00894955	0.00844892	0.00868011	0.00944135	0.00899421	0.00913435	0.00915818	0.00922381	0.00900699	0.0091843	0.009308	0.00795353	0.00945121	0.00871723	0.00981452	0.00934359	0.00952159	0.00894581	0.00894549	0.00905521	0.00927044	0.00913844	0.00848545	0.00815698	0.00732871	0.00857367	0.00789837	0.0093761	0.00784778	0.00812161	0.00879943	0.00669966	0.00853945	0.00902076	0.00907357	0.0091393	0.00894616	0.00941238	0.00935117	0.00928673	0.00951141	0.00923911
1:Antistreptavidin IgG2 HC	289	N289+A1S1	N-Glycan	1:E285-R293 = 1156.5149m(N289+A1S1)	EEQFNSTFR	0.000228328	0.000313755	0.000312817	0.000282771	0.000280287	0.000314939	0.000307639	0.000326679	0.000314761	0.000310536	0.0003292	0.000337076	0.000310556	0.000188741	0.000337765	0.000318831	0.00036774	0.000309751	0.000265784	0.000352897	0.000332337	0.000321979	0.000334733	0.00035086	0.000258093	0.000270289	0.000345098	0.000305857	0.000340213	0.000264133	0.000253532	0.000299026	0.000297035	0.00027259	0.000359325	0.000335222	0.000329106	0.000353409	0.000369111	0.000347999	0.000350737	0.000352365	0.000383164	0.000353959
1:Antistreptavidin IgG2 HC	289	N289+A1S1F	N-Glycan	1:E285-R293 = 1156.5149m(N289+A1S1F)	EEQFNSTFR	0.00580971	0.00736508	0.00713581	0.00624374	0.006988	0.00722583	0.00672626	0.00769862	0.00737079	0.0072548	0.00751018	0.0073751	0.00735509	0.00545239	0.0081066	0.00711267	0.00746582	0.00724191	0.0068492	0.00727515	0.00797144	0.00732677	0.00726766	0.00754137	0.00661669	0.00684797	0.0082962	0.0070111	0.00735102	0.00659368	0.00715103	0.00733737	0.00693455	0.00632151	0.00770203	0.00747648	0.00724769	0.00760975	0.00755791	0.00726457	0.00758363	0.00737103	0.0078794	0.00758021
1:Antistreptavidin IgG2 HC	289	N289+A1S1M4	N-Glycan	1:E285-R293 = 1156.5149m(N289+A1S1M4)	EEQFNSTFR	0.000583443	0.000754887	0.00084318	0.000722239	0.000861017	0.000928507	0.00077219	0.000974799	0.000886995	0.000892934	0.000924253	0.000922306	0.000622636	0.00067926	0.000861224	0.000817393	0.000859775	0.000848085	0.000868992	0.000791832	0.000936901	0.000870238	0.000853739	0.000931075	0.000752817	0.000583394	0.000572028	0.000746882	0.000732831	0.000715795	0.00059279	0.000776226	0.0006643	0.000876954	0.000890254	0.000961486	0.00102684	0.00103209	0.00110019	0.00102848	0.00105476	0.00103043	0.00116527	0.00109262
1:Antistreptavidin IgG2 HC	289	N289+A1S1M4F	N-Glycan	1:E285-R293 = 1156.5149m(N289+A1S1M4F)	EEQFNSTFR	0.00397011	0.00461065	0.00541858	0.00483451	0.00524443	0.00571377	0.00485286	0.00575351	0.00555794	0.00538125	0.00555399	0.00555785	0.00418859	0.00403004	0.00570306	0.00520181	0.00553778	0.00532085	0.00532204	0.00506294	0.00580729	0.00552918	0.00541236	0.0054037	0.00479988	0.00422528	0.00437194	0.00527076	0.00498045	0.0047007	0.00407366	0.00485241	0.00421157	0.00553729	0.00534993	0.00586091	0.00704018	0.00722008	0.00766453	0.00749188	0.00788268	0.00764847	0.00792072	0.00769702
1:Antistreptavidin IgG2 HC	289	N289+A1S1M5	N-Glycan	1:E285-R293 = 1156.5149m(N289+A1S1M5)	EEQFNSTFR	0.00148007	0.00139674	0.00166166	0.00154638	0.0016936	0.00168227	0.0014243	0.00173824	0.00168081	0.00160315	0.00162934	0.00172702	0.00142291	0.00139052	0.00177962	0.00155922	0.00161451	0.001532	0.00160925	0.00164375	0.00183709	0.00178642	0.00169812	0.00178909	0.00160688	0.0012055	0.00149049	0.00155872	0.00151228	0.00149381	0.00122491	0.00148849	0.00138	0.00183668	0.00177948	0.00196299	0.00210043	0.0021234	0.00214984	0.00212353	0.00213913	0.0021106	0.00218016	0.00214534
1:Antistreptavidin IgG2 HC	289	N289+A1S1M5F	N-Glycan	1:E285-R293 = 1156.5149m(N289+A1S1M5F)	EEQFNSTFR	0.00266985	0.00240504	0.00299529	0.0028669	0.00311977	0.0030946	0.00253566	0.00315413	0.00317827	0.00292594	0.00309234	0.00318574	0.00264943	0.0026272	0.00339272	0.00287923	0.00300657	0.00292272	0.00307811	0.00315243	0.00336824	0.00334273	0.00312662	0.00331853	0.00294606	0.00247691	0.00280835	0.00268796	0.00266982	0.00246313	0.002268	0.00282149	0.00244821	0.00316322	0.00336797	0.0036432	0.00456994	0.00448839	0.00456681	0.00424545	0.00459828	0.00453542	0.00472108	0.00437003
1:Antistreptavidin IgG2 HC	289	N289+A2G0	N-Glycan	1:E285-R293 = 1156.5149m(N289+A2G0)	EEQFNSTFR	0.014642	0.0152054	0.0156342	0.015617	0.0145781	0.0155488	0.0151274	0.0152741	0.0151616	0.0149828	0.015246	0.014944	0.0158119	0.0147589	0.0146795	0.0152115	0.0152999	0.0146128	0.0155067	0.0153567	0.0154583	0.0152779	0.0151319	0.0153367	0.016298	0.0159292	0.0137808	0.015179	0.0142776	0.015961	0.0156334	0.015471	0.0151211	0.016271	0.0145351	0.0153441	0.0113987	0.0109245	0.0106775	0.011068	0.0110782	0.0104037	0.0111213	0.0104703
1:Antistreptavidin IgG2 HC	289	N289+A2G0F	N-Glycan	1:E285-R293 = 1156.5149m(N289+A2G0F)	EEQFNSTFR	0.4066	0.396462	0.405591	0.405878	0.401641	0.395511	0.405534	0.399893	0.397114	0.393435	0.397217	0.399796	0.399617	0.42031	0.397561	0.39671	0.391472	0.400568	0.386743	0.398865	0.393515	0.397737	0.397615	0.399643	0.403718	0.410635	0.4277	0.407168	0.414782	0.404724	0.396185	0.401003	0.423149	0.421085	0.398203	0.398674	0.37574	0.374463	0.373221	0.369833	0.36707	0.372887	0.35966	0.371115
1:Antistreptavidin IgG2 HC	289	N289+A2G1	N-Glycan	1:E285-R293 = 1156.5149m(N289+A2G1)	EEQFNSTFR	0.00859858	0.00805074	0.00817543	0.00866813	0.00853245	0.00873289	0.00892634	0.00856895	0.00889839	0.008917	0.00872321	0.00799784	0.00886872	0.00822473	0.00843348	0.00840871	0.00868301	0.00857732	0.00940623	0.00858076	0.00882397	0.0089735	0.00865164	0.00864412	0.00871462	0.00853204	0.00817253	0.00861028	0.00785547	0.00883104	0.00870395	0.00832555	0.00832079	0.00852293	0.0086751	0.00868137	0.0067588	0.00630557	0.00678314	0.00675134	0.0068111	0.00660123	0.00661072	0.00643147
1:Antistreptavidin IgG2 HC	289	N289+A2G1F	N-Glycan	1:E285-R293 = 1156.5149m(N289+A2G1F)	EEQFNSTFR	0.328247	0.329134	0.321628	0.335176	0.326388	0.32395	0.32299	0.320265	0.321524	0.32671	0.324826	0.322058	0.325244	0.330473	0.319412	0.32489	0.322002	0.317572	0.322235	0.32537	0.325175	0.321366	0.319101	0.321191	0.32419	0.321515	0.315627	0.324994	0.314635	0.310304	0.332322	0.322054	0.304772	0.31868	0.321235	0.321684	0.327594	0.331158	0.329941	0.332034	0.32981	0.330104	0.33847	0.333358
1:Antistreptavidin IgG2 HC	289	N289+A2G2	N-Glycan	1:E285-R293 = 1156.5149m(N289+A2G2)	EEQFNSTFR	0.00109135	0.00104558	0.00107339	0.00101116	0.00112737	0.00106031	0.00117098	0.0011328	0.0011026	0.00108245	0.00114119	0.00110958	0.00103744	0.001029	0.00108854	0.00114277	0.00112174	0.0011792	0.00119544	0.00114319	0.00109869	0.00116159	0.00114715	0.0011173	0.00101211	0.00100425	0.000874485	0.00102841	0.000906407	0.00110582	0.000966796	0.000974244	0.00113018	0.000768279	0.00118256	0.00111235	0.000750222	0.000864882	0.000826496	0.000818633	0.000866964	0.000885085	0.000829322	0.000860863
1:Antistreptavidin IgG2 HC	289	N289+A2G2F	N-Glycan	1:E285-R293 = 1156.5149m(N289+A2G2F)	EEQFNSTFR	0.0552181	0.0562293	0.0541785	0.056664	0.0547754	0.0557919	0.0551398	0.0550584	0.0552639	0.0571747	0.055556	0.0543893	0.0535674	0.0477463	0.0520753	0.054613	0.0565602	0.0557957	0.0599775	0.0554236	0.0562715	0.0547748	0.0555312	0.0551887	0.0555029	0.0530579	0.0488436	0.0506952	0.0491179	0.0535853	0.0524534	0.0528353	0.052245	0.0494687	0.0541811	0.053836	0.0597942	0.061216	0.0634479	0.0612597	0.0632374	0.0626854	0.0623372	0.0593587
1:Antistreptavidin IgG2 HC	289	N289+A2S1G0F	N-Glycan	1:E285-R293 = 1156.5149m(N289+A2S1G0F)	EEQFNSTFR	0.0012024	0.00162757	0.00156115	0.0014821	0.0016081	0.00177543	0.00157409	0.0018737	0.00180779	0.00182276	0.00179577	0.00176334	0.00130102	0.00130843	0.00169996	0.00164658	0.00176809	0.00172208	0.00169906	0.00147971	0.00185349	0.00173508	0.00165251	0.0017124	0.00142198	0.0013597	0.00143052	0.0017577	0.00156159	0.00144019	0.00123333	0.00148998	0.00133234	0.00116694	0.00191866	0.00182795	0.00214096	0.00205561	0.00205763	0.00209837	0.00214589	0.00202799	0.00212385	0.00214221
1:Antistreptavidin IgG2 HC	289	N289+A2S1G1F	N-Glycan	1:E285-R293 = 1156.5149m(N289+A2S1G1F)	EEQFNSTFR	0.00163358	0.00211031	0.0020594	0.00192052	0.00210486	0.00231344	0.00207103	0.00229742	0.00229171	0.00223165	0.00244518	0.00239829	0.00172585	0.00186926	0.00225217	0.00218384	0.00220258	0.00217989	0.00214375	0.00209502	0.00230791	0.00234902	0.00223108	0.00224363	0.00176002	0.00157917	0.00174024	0.00217363	0.002066	0.00186954	0.00139638	0.00183419	0.00154776	0.001862	0.0024041	0.00238983	0.00313798	0.00315519	0.0031988	0.00316374	0.00333988	0.00319521	0.00332328	0.00306813
1:Antistreptavidin IgG2 HC	289	N289+A2S2F	N-Glycan	1:E285-R293 = 1156.5149m(N289+A2S2F)	EEQFNSTFR	0.000227286	0.000267026	0.000373787	0.000368936	0.000385133	0.00039865	0.000394496	0.000445025	0.000476382	0.000470063	0.00048215	0.000482882	0.000180573	0.000266149	0.000433925	0.000419808	0.000477738	0.000462048	0.000449842	0.00037557	0.000516775	0.000497082	0.0004037	0.000518784	0.000206241	0.000296434	0.000282539	0.000279272	0.000270811	0.000278814	0.000301195	0.000341814	0.000371859	0.000331171	0.00053778	0.00052624	0.000865534	0.000947282	0.00101423	0.000979341	0.00100082	0.00103112	0.00108723	0.00110193
1:Antistreptavidin IgG2 HC	289	N289+A3G1F	N-Glycan	1:E285-R293 = 1156.5149m(N289+A3G1F)	EEQFNSTFR	0.000900421	0.000976628	0.000900825	0.000803096	0.000924947	0.000947647	0.000918558	0.000941284	0.000878935	0.000992571	0.000916089	0.000947408	0.000885814	0.000821869	0.0010358	0.000901095	0.000946687	0.000980204	0.00103246	0.000936904	0.000933013	0.00094591	0.000995957	0.000974601	0.000783671	0.000764969	0.000568695	0.000692504	0.00076926	0.000850431	0.000805903	0.000834119	0.000865923	0.000644215	0.000920897	0.000927711	0.00105955	0.00109734	0.00106431	0.0011064	0.00107936	0.00114088	0.00114599	0.00114999
1:Antistreptavidin IgG2 HC	289	N289+A3G2F	N-Glycan	1:E285-R293 = 1156.5149m(N289+A3G2F)	EEQFNSTFR	0.00034218	0.000378998	0.000394807	0.0002804	0.000336414	0.000341729	0.000322738	0.000422864	0.000380335	0.000408188	0.000387162	0.000409167	0.000329542	0.000280032	0.000379316	0.000383951	0.000433367	0.000372189	0.000408879	0.000390057	0.00036734	0.000396059	0.000414578	0.000404477	0.000220685	0.000320171	0.000173728	0.000193187	0.000269577	0.000302027	0.000219387	0.000285498	0.000310151	0.000274476	0.000429718	0.000400255	0.000569895	0.000590718	0.000604215	0.000602977	0.000609074	0.000530405	0.000588246	0.000612135
1:Antistreptavidin IgG2 HC	289	N289+Deamidation	+Deamidation	1:E285-R293 = 1156.5149m(N289+Deamidation)	EEQFNSTFR	0.000580308	0.000578085	0.000745511	0.000660348	0.000675839	0.000677832	0.00458295	0.00502861	0.00518509	0.00508112	0.00521186	0.00532171	0.000743712	0.000684125	0.000863038	0.00516138	0.00549987	0.00528865	0.00131799	0.00119789	0.0013425	0.0018716	0.00187678	0.00181933	0.000844473	0.000792145	0.00104884	0.00663002	0.00674553	0.00650081	0.00153886	0.00150609	0.00132937	0.00232597	0.00176721	0.00163246	0.000325479	0.000337321	0.000330406	0.0023627	0.00237786	0.00232317	0.000560659	0.000577974
1:Antistreptavidin IgG2 HC	289	N289+Gn	N-Glycan	1:E285-R293 = 1156.5149m(N289+Gn)	EEQFNSTFR	0.000302475	0.000341804	0.000381251	0.000358272	0.000379466	0.000326192	0.000366308	0.000394424	0.00039325	0.000386786	0.00039676	0.000393648	0.000373802	0.000382564	0.000448171	0.000385409	0.000384851	0.000390559	0.000362378	0.000359728	0.00041847	0.000437027	0.000427724	0.00043787	0.000338344	0.000352541	0.000356906	0.000405049	0.000430529	0.000444313	0.00041281	0.000526016	0.000410971	0.000381703	0.000296177	0.000426675	0.000205336	0.000221964	0.000205504	0.000206309	0.000214618	0.000226782	0.000208132	0.000215299
1:Antistreptavidin IgG2 HC	289	N289+M5	N-Glycan	1:E285-R293 = 1156.5149m(N289+M5)	EEQFNSTFR	0.0454622	0.0469757	0.0444021	0.0379171	0.0448793	0.0480663	0.0449439	0.0453495	0.0450543	0.0444485	0.0431477	0.0450053	0.0447387	0.0378586	0.0489783	0.0459085	0.0476503	0.0465559	0.0503597	0.0463819	0.0457384	0.0462862	0.0475865	0.0459237	0.0425148	0.0404078	0.0349998	0.0370493	0.0396282	0.0449535	0.0442808	0.0445013	0.0438262	0.0377251	0.0473567	0.0463468	0.0667031	0.0641776	0.0641068	0.0657768	0.0670712	0.0639993	0.0673045	0.0655771
1:Antistreptavidin IgG2 HC	289	N289+M6	N-Glycan	1:E285-R293 = 1156.5149m(N289+M6)	EEQFNSTFR	0.0130382	0.01301	0.0133087	0.0112938	0.0130419	0.0141139	0.011936	0.0134862	0.0132555	0.0134168	0.0128383	0.0134236	0.0135619	0.0112986	0.0139368	0.0134827	0.0141075	0.0141021	0.0145249	0.0133612	0.0132822	0.0132343	0.0137351	0.0132699	0.0120216	0.0143533	0.011915	0.0102648	0.0133592	0.0141518	0.0132236	0.0135524	0.0128357	0.0124575	0.0142187	0.0134736	0.0162411	0.0157365	0.0156559	0.0155687	0.0156266	0.0153628	0.0159943	0.0159873
1:Antistreptavidin IgG2 HC	289	N289+M7	N-Glycan	1:E285-R293 = 1156.5149m(N289+M7)	EEQFNSTFR	0.00588498	0.00606882	0.0058699	0.00490496	0.0057228	0.00645005	0.0044028	0.0059644	0.00605415	0.00624217	0.00594811	0.00635912	0.00619478	0.00836874	0.00627968	0.00605854	0.00646614	0.00636	0.00670339	0.00580706	0.00639227	0.0062067	0.00669058	0.00590165	0.00812373	0.00562927	0.00488767	0.00648673	0.0055729	0.00629966	0.00589575	0.00650506	0.00571121	0.00503864	0.00672101	0.00632592	0.00842343	0.00811025	0.00794564	0.00790717	0.0080693	0.00786096	0.00803908	0.00790941
1:Antistreptavidin IgG2 HC	289	N289+M8	N-Glycan	1:E285-R293 = 1156.5149m(N289+M8)	EEQFNSTFR	0.00609194	0.00649179	0.00633736	0.00557312	0.00640938	0.0067141	0.00589459	0.00647998	0.00671787	0.00672666	0.00645931	0.00660122	0.00667705	0.00650152	0.00676599	0.00645632	0.00702919	0.00703663	0.00730263	0.00657469	0.00670723	0.00699102	0.00716929	0.00669227	0.00581941	0.00591995	0.00542419	0.00679823	0.00593714	0.00663938	0.00693088	0.00658546	0.00598015	0.00548443	0.00705098	0.00678081	0.00963583	0.00934295	0.00903091	0.00906823	0.00936238	0.00914701	0.0093503	0.00904325
1:Antistreptavidin IgG2 HC	289	N289+M9	N-Glycan	1:E285-R293 = 1156.5149m(N289+M9)	EEQFNSTFR	0.000375375	0.000561454	0.000578261	0.000492578	0.000567783	0.000585252	0.000510536	0.000618057	0.000644072	0.000628105	0.000583659	0.000665374	0.000548492	0.00036215	0.000618012	0.000585244	0.000583462	0.00056185	0.000672099	0.000568885	0.000596251	0.000603067	0.000630298	0.000684565	0.000333536	0.000341701	0.000362723	0.000343826	0.000261261	0.000292772	0.000434034	0.000455077	0.000448246	0.000405008	0.000603934	0.000531918	0.00111706	0.00110693	0.00103427	0.00108947	0.0011132	0.00111286	0.001061	0.00101549
1:Antistreptavidin IgG2 HC	289	N289+Unglycosylated	N-Glycan	1:E285-R293 = 1156.5149m(N289+Unglycosylated)	EEQFNSTFR	0.0127807	0.0161164	0.0163705	0.0137768	0.0155708	0.014403	0.0136678	0.0145599	0.0158408	0.0149447	0.0157603	0.0150878	0.0186413	0.0154054	0.0187396	0.0149075	0.0157262	0.0152369	0.017406	0.0160924	0.017105	0.0175028	0.0178786	0.0164796	0.0191224	0.0186351	0.0228241	0.0198237	0.0208879	0.0200331	0.020706	0.0205178	0.0186003	0.0164501	0.0164142	0.0155905	0.00623599	0.00611738	0.00644171	0.00603618	0.00621055	0.00606841	0.00664525	0.00647701
1:Antistreptavidin IgG2 HC	294	V294(V294M)[GTG] (1 base change)	Sequence Variant (1 base change)	1:V294-K309 = 1792.9836m(V294M)	VVSVLTVVHQDWLNGK	5.80026e-05	7.04248e-05	5.95632e-05	5.76298e-05	6.07674e-05	5.75597e-05	6.38815e-05	6.06373e-05	5.55559e-05	6.47953e-05	6.29381e-05	5.959e-05	4.45756e-05	6.9807e-05	6.14631e-05	5.77822e-05	5.25127e-05	5.78142e-05	6.47439e-05	6.12608e-05	6.7309e-05	5.97135e-05	6.65038e-05	6.37055e-05	5.72134e-05	6.57935e-05	7.41775e-05	7.10724e-05	5.94642e-05	6.12468e-05	6.40704e-05	6.03999e-05	6.25202e-05	6.57434e-05	6.6476e-05	6.66649e-05	4.29027e-05	4.75689e-05	4.98833e-05	5.19351e-05	4.82844e-05	5.31337e-05	5.35264e-05	5.08665e-05
1:Antistreptavidin IgG2 HC	296	S296(S296N)[AGC] (1 base change)	Sequence Variant (1 base change)	1:V294-K309 = 1792.9836m(S296N)	VVSVLTVVHQDWLNGK	0.000169649	0.000211327	0.000174287	0.00016714	0.000160743	0.000160963	0.000167089	0.000161722	0.000164952	0.000172153	0.000184172	0.000174633	0.000209942	0.000138913	0.000192	0.000177273	0.00016568	0.000178387	0.000175987	0.000183206	0.000192986	0.00017659	0.000183417	0.000180463	0.000203545	0.000202127	0.000221122	0.000228683	0.000209617	0.000227843	0.000196026	0.000188365	0.000222213	0.000177314	0.000188216	0.000198491	0.000130125	0.00013807	0.000134392	0.000149083	0.000130422	0.000153796	0.000151417	0.000147526
1:Antistreptavidin IgG2 HC	297	V297(V297A)[GTC] (1 base change)	Sequence Variant (1 base change)	1:V294-K309 = 1792.9836m(V297A)	VVSVLTVVHQDWLNGK	3.81884e-05	3.85414e-05	4.13385e-05	4.18867e-05	4.51632e-05	4.34271e-05	4.31517e-05	4.46781e-05	4.20549e-05	4.66494e-05	5.00431e-05	4.86609e-05	4.11108e-05	4.09993e-05	4.90389e-05	4.49855e-05	4.50867e-05	4.88848e-05	4.45843e-05	4.91962e-05	5.12999e-05	5.07756e-05	4.89559e-05	4.77194e-05	6.58011e-05	6.16898e-05	7.11583e-05	5.03547e-05	5.49951e-05	6.30201e-05	5.70766e-05	6.57515e-05	6.25761e-05	6.23856e-05	5.14421e-05	6.29064e-05	3.78793e-05	3.52054e-05	3.73701e-05	4.26325e-05	4.02267e-05	4.38639e-05	4.66525e-05	4.21426e-05
1:Antistreptavidin IgG2 HC	297	V297(V297I)[GTC] (1 base change)	Sequence Variant (1 base change)	1:V294-K309 = 1792.9836m(V297I)	VVSVLTVVHQDWLNGK	0.000319009	0.000308226	0.000308614	0.000304997	0.000298174	0.000302639	0.000306981	0.000301701	0.000293869	0.000295051	0.000323793	0.000325207	0.000209156	0.000278812	0.00031869	0.000308946	0.000282635	0.000292931	0.000309161	0.000306774	0.000322169	0.000314346	0.000310057	0.000304575	0.000296441	0.000286355	0.000297231	0.000306404	0.000289882	0.0002893	0.00026433	0.000271879	0.000315722	0.000305911	0.000294247	0.00028696	0.000244475	0.000246813	0.000250488	0.000282247	0.000254588	0.000289209	0.000290663	0.000261349
1:Antistreptavidin IgG2 HC	300	V300(V300I)[GTT] (1 base change)	Sequence Variant (1 base change)	1:V294-K309 = 1792.9836m(V300I)	VVSVLTVVHQDWLNGK	0.000149392	0.000148688	0.000153697	0.000144179	0.000144743	0.000151115	0.000146386	0.000150735	0.000145911	0.000136545	0.000151503	0.0001556	0.000164642	0.00014974	0.000159065	0.000146022	0.000148841	0.000144045	0.000150081	0.000150835	0.000146059	0.00015116	0.000157955	0.000153018	0.00012554	0.000152077	0.000147591	0.000133208	0.00013393	0.000142312	0.000131458	0.000137047	0.000146506	0.000140527	0.000150342	0.000130172	0.000107885	0.00010725	0.000117955	0.000128186	0.000112843	0.000130459	0.000127737	0.000117411
1:Antistreptavidin IgG2 HC	302	H302+Double Oxidation	+Double Oxidation	1:V294-K309 = 1792.9836m(H302+Double Oxidation)	VVSVLTVVHQDWLNGK	5.65847e-05	4.41943e-05	4.66096e-05	4.60835e-05	4.40504e-05	4.3882e-05	4.52858e-05	5.09566e-05	5.47247e-05	5.63725e-05	5.74312e-05	5.4013e-05	2.3201e-05	2.37132e-05	5.48829e-05	5.97115e-05	5.75959e-05	5.84972e-05	4.66855e-05	4.80183e-05	4.87443e-05	4.75721e-05	4.72993e-05	5.43684e-05	4.26459e-05	4.90794e-05	5.5324e-05	4.9598e-05	5.68663e-05	4.77086e-05	4.83382e-05	4.8706e-05	5.41514e-05	8.49779e-05	6.73696e-05	6.45318e-05	6.31617e-05	6.48203e-05	6.43314e-05	8.84352e-05	7.68856e-05	8.65178e-05	7.80085e-05	6.81923e-05
1:Antistreptavidin IgG2 HC	302	H302(H302Q)[CAC] (1 base change)	Sequence Variant (1 base change)	1:V294-K309 = 1792.9836m(H302Q)	VVSVLTVVHQDWLNGK	2.2082e-05	1.31389e-05	1.92014e-05	1.76463e-05	1.70035e-05	2.37685e-05	2.06624e-05	2.00321e-05	1.64036e-05	1.60019e-05	2.03058e-05	1.63713e-05	1.23796e-05	8.30124e-06	1.98731e-05	2.01333e-05	1.85568e-05	1.97194e-05	1.73019e-05	1.75152e-05	1.91399e-05	2.03707e-05	1.88138e-05	2.16567e-05	1.5283e-05	1.32378e-05	1.04014e-05	1.31606e-05	1.48732e-05	9.65299e-06	1.49159e-05	1.51742e-05	1.42174e-05	2.78809e-05	1.88293e-05	1.77908e-05	2.76462e-05	2.81881e-05	3.17504e-05	3.09026e-05	2.79041e-05	3.19369e-05	3.22463e-05	2.84713e-05
1:Antistreptavidin IgG2 HC	304	D304+H2O loss	+H2O loss	1:V294-K309 = 1792.9836m(D304+H2O loss)	VVSVLTVVHQDWLNGK	0.00127509	0.000850075	0.00115303	0.00121139	0.00114382	0.00103406	0.00102048	0.00104371	0.00104531	0.00107008	0.00119933	0.00101879	0.000916918	0.00109223	0.00129225	0.00110512	0.00116793	0.00124274	0.00126961	0.00111944	0.00102748	0.0012178	0.00114369	0.00121172	0.00103204	0.00113164	0.001333	0.000767682	0.00105017	0.00101637	0.00109464	0.00101665	0.000977999	0.00163462	0.00127387	0.00135764	0.0017142	0.00169731	0.00171636	0.00189761	0.00163864	0.0018971	0.00186346	0.00170564
1:Antistreptavidin IgG2 HC	305	W305+Double Oxidation	+Double Oxidation	1:V294-K309 = 1792.9836m(W305+Double Oxidation)	VVSVLTVVHQDWLNGK	0.000402886	0.000481405	0.000520396	0.000338593	0.000391422	0.000532201	0.000470837	0.000410069	0.00027301	0.000311601	0.000532152	0.000392181	0.000521631	0.000515368	0.000629646	0.000539018	0.000541978	0.000663714	0.000673053	0.000623188	0.000606162	0.00047288	0.000533306	0.000445134	0.00241047	0.00190117	0.00150119	0.00160798	0.000713447	0.00143098	0.000909744	0.000903346	0.000944547	0.00102016	0.000737329	0.000925233	0.000670496	0.000556085	0.000590594	0.000776567	0.0006043	0.000521819	0.000651587	0.000670213
1:Antistreptavidin IgG2 HC	305	W305+Oxidation	+Oxidation	1:V294-K309 = 1792.9836m(W305+Oxidation)	VVSVLTVVHQDWLNGK	0.000207936	0.000201959	0.000211311	0.000203488	0.000217205	0.000260845	0.000223203	0.00022877	0.00022948	0.000216032	0.000234506	0.000233434	0.000192891	0.000174547	0.000226273	0.000231047	0.000248306	0.000243425	0.000232808	0.00022382	0.000216807	0.000217044	0.00021063	0.000211958	0.0002832	0.000275512	0.000276053	0.000313646	0.000230693	0.000329494	0.000228271	0.000224865	0.000238409	0.000286654	0.00024603	0.000219134	0.000176029	0.000190486	0.000180626	0.000228319	0.000197645	0.000269967	0.000209132	0.000199942
1:Antistreptavidin IgG2 HC	307	N307+Deamidation	+Deamidation	1:V294-K309 = 1792.9836m(N307+Deamidation)	VVSVLTVVHQDWLNGK	0.00415988	0.00488846	0.00434589	0.00419162	0.00434909	0.00405432	0.005067	0.0048905	0.00472396	0.00493762	0.0050305	0.00513305	0.00512423	0.00423323	0.00464185	0.00511212	0.00486163	0.00508563	0.00465371	0.0046135	0.00492388	0.00478989	0.0050368	0.00488504	0.00453921	0.0045532	0.00471395	0.00550822	0.00505527	0.00519101	0.00388036	0.00390555	0.00474611	0.00389891	0.00462553	0.00402217	0.00442772	0.00465335	0.00477752	0.00593042	0.00552175	0.00610173	0.00573499	0.00515087
1:Antistreptavidin IgG2 HC	307	N307+NH3 loss	+NH3 loss	1:V294-K309 = 1792.9836m(N307+NH3 loss)	VVSVLTVVHQDWLNGK	0.0253328	0.0268818	0.025312	0.0248527	0.0243304	0.0237486	0.0258478	0.0243457	0.0247787	0.0248455	0.0258001	0.0258927	0.0251505	0.0307774	0.0266487	0.0247948	0.0238137	0.0256565	0.0252097	0.0257092	0.0261493	0.0253333	0.0213205	0.0250374	0.023952	0.0239409	0.0249928	0.0258948	0.0242986	0.0227579	0.0215694	0.0218015	0.0249915	0.0234784	0.0242721	0.0223151	0.0270588	0.0277607	0.0307529	0.0315856	0.029763	0.0326108	0.0342907	0.0307423
1:Antistreptavidin IgG2 HC	309	K309+Glycation	+Glycation	1:V294-K312 = 2213.1845m(K309+Glycation)	VVSVLTVVHQDWLNGKEYK	0.000679526	0.000777447	0.000709706	0.000765091	0.000734247	0.000739734	0.00288197	0.00278073	0.00300502	0.00282359	0.00289653	0.0032034	0.000574337	0.000556158	0.000727951	0.00258769	0.00270598	0.00292048	0.000885936	0.000998572	0.00101458	0.00112316	0.00124778	0.00108703	0.000825113	0.000992695	0.000889359	0.00308319	0.00245794	0.0034014	0.00100045	0.000842299	0.00100099	0.00144106	0.00108961	0.00115096	0.000459715	0.000447704	0.000554874	0.00209072	0.00203187	0.00218143	0.000830379	0.000704719
1:Antistreptavidin IgG2 HC	318	K318+Glycation	+Glycation	1:C313-K326 = 1540.8283m(K318+Glycation)	CKVSNKGLPAPIEK	1.89764e-05	2.26877e-06	1.20968e-05	1.45877e-05	4.10501e-06	3.74453e-06	2.87126e-05	0.00023323	4.76647e-05	2.62578e-05	2.64251e-05	5.94217e-05	4.90938e-05	1.02503e-05	6.2415e-06	2.29338e-05	2.87967e-05	2.81642e-05	1.73512e-05	1.99729e-05	1.09014e-05	2.3806e-05	2.51277e-05	1.02698e-05	0.000178805	0.000195558	0.000242322	0.000372079	0.000479218	0.000532452	0.000315416	0.000185379	0.000188473	0.000170959	0.000208702	0.000332284	4.65546e-05	6.72284e-06	3.28201e-06	1.31749e-05	2.05509e-05	1.79958e-05	1.20459e-05	1.40462e-05
1:Antistreptavidin IgG2 HC	319	G319(G319S)[GGC] (1 base change)	Sequence Variant (1 base change)	1:G319-K326 = 823.48035m(G319S)	GLPAPIEK	6.95004e-05	7.19682e-05	7.50857e-05	6.8839e-05	7.52568e-05	7.01703e-05	7.01701e-05	7.26165e-05	7.67705e-05	6.82411e-05	7.94891e-05	7.35221e-05	8.242e-05	7.55367e-05	7.66116e-05	7.33437e-05	7.6895e-05	7.92067e-05	7.56128e-05	7.56089e-05	7.64204e-05	7.81808e-05	7.46233e-05	7.62935e-05	8.25126e-05	8.10023e-05	7.77173e-05	7.87472e-05	8.39433e-05	7.76353e-05	7.91068e-05	8.16431e-05	8.41431e-05	7.88795e-05	8.18937e-05	8.0313e-05	4.14318e-05	4.04874e-05	4.60676e-05	4.88618e-05	4.88131e-05	4.75733e-05	4.97945e-05	4.42117e-05
1:Antistreptavidin IgG2 HC	321	P321+Hydroxylation	+Hydroxylation	1:G319-K326 = 823.4804m(P321+Hydroxylation)	GLPAPIEK	0.00220125	0.00229162	0.0021651	0.002086	0.00207585	0.00213988	0.00210534	0.00207204	0.00222332	0.00218046	0.00221525	0.00215618	0.0020204	0.00271775	0.00223572	0.00213952	0.00233002	0.00219352	0.00226736	0.00224663	0.00223049	0.00219174	0.00227539	0.0022006	0.00208362	0.00227474	0.00199699	0.00218494	0.00222864	0.00221812	0.0023782	0.00214975	0.00241409	0.00214284	0.00228649	0.00228217	0.00138389	0.00146584	0.00142995	0.0014223	0.00153322	0.00151641	0.00152766	0.00149374
1:Antistreptavidin IgG2 HC	352	K352+Glycation	+Glycation	1:E348-K362 = 1779.8747m(K352+Glycation)	EEMTKNQVSLTCLVK	0.000438249	0.000394963	0.000469685	0.000482208	0.000467202	0.000488085	0.00068398	0.000730298	0.000698132	0.000706795	0.000667693	0.000633961	0.000499334	0.000471204	0.000496872	0.000674778	0.000694037	0.000708955	0.000492875	0.000538478	0.000508368	0.000559668	0.000557901	0.000509829	0.0003964	0.000422818	0.000279821	0.000656571	0.000616968	0.000597964	0.000469814	0.000399059	0.000425211	0.00023601	0.000500544	0.000455663	0.000334676	0.000334696	0.000347537	0.000505914	0.000514522	0.000540261	0.000405916	0.000369879
1:Antistreptavidin IgG2 HC	353	~N353+NH3 loss	+NH3 loss	1:N353-K362 = 1161.6064m(~N353+NH3 loss)	NQVSLTCLVK	0.00117962	0.000991839	0.00105241	0.0010545	0.00103141	0.00102679	0.00106638	0.0010516	0.00104766	0.00110568	0.00106453	0.00101581	0.0011058	0.00116674	0.001167	0.0011038	0.00107422	0.00109954	0.00115968	0.00070973	0.00111387	0.00111866	0.000995819	0.00107851	0.00102313	0.000994371	0.00081239	0.00104282	0.000997058	0.00104974	0.00116321	0.000980205	0.000982662	0.000734825	0.000954646	0.000899686	0.000591068	0.000629624	0.000647742	0.00068004	0.000700699	0.000749794	0.00070236	0.000661824
1:Antistreptavidin IgG2 HC	353	N353(N353K)[AAC] (1 base change)	Sequence Variant (1 base change)	1:N353-K362 = 1161.6064m(N353K)	NQVSLTCLVK	2.52476e-05	2.43751e-05	2.36253e-05	2.05633e-05	2.37729e-05	2.15477e-05	2.17015e-05	4.41153e-05	2.13907e-05	2.12396e-05	2.09301e-05	2.13898e-05	3.52152e-05	3.59929e-05	2.0559e-05	3.18878e-05	2.77489e-05	2.03505e-05	2.37429e-05	2.07992e-05	1.98902e-05	2.73279e-05	2.40748e-05	2.32058e-05	3.00177e-05	3.47791e-05	3.50856e-05	4.20744e-05	4.23853e-05	4.06605e-05	5.69265e-05	4.24862e-05	3.97428e-05	3.71916e-05	4.15948e-05	4.19654e-05	2.3172e-05	1.54487e-05	1.74778e-05	1.77903e-05	1.5232e-05	2.13864e-05	2.28905e-05	2.27763e-05
1:Antistreptavidin IgG2 HC	359	C359(C359Y)[TGC] (1 base change)	Sequence Variant (1 base change)	1:N353-K362 = 1161.6064m(C359Y)	NQVSLTCLVK	0.000157396	0.000145113	0.00014298	0.000148697	0.000148676	0.000140433	0.000142161	0.000149103	0.000140398	0.000141245	0.000146513	0.000135332	0.000123121	0.000160226	0.000146813	0.000141966	0.000141144	0.00014392	0.000141702	0.000146198	0.000152048	0.000145942	0.000145337	0.000149011	0.000124834	0.000135124	0.000118748	0.000109432	0.000131468	0.000141793	0.000168755	0.000133113	0.000141596	0.000129508	0.00014723	0.000128016	9.86992e-05	9.80687e-05	0.000102371	9.4879e-05	0.000114429	0.000112056	0.000113225	0.000107049
1:Antistreptavidin IgG2 HC	362	K362+Hydroxylation	+Hydroxylation	1:N353-K362 = 1161.6064m(K362+Hydroxylation)	NQVSLTCLVK	5.67212e-05	5.7208e-05	6.30462e-05	5.7664e-05	6.27937e-05	5.53876e-05	6.13736e-05	6.60634e-05	6.25668e-05	5.57097e-05	6.84575e-05	6.40364e-05	5.60277e-05	5.84147e-05	6.00559e-05	6.05143e-05	6.12495e-05	5.99604e-05	5.77509e-05	6.45184e-05	5.61829e-05	6.1059e-05	5.62278e-05	5.97273e-05	5.90604e-05	6.26162e-05	5.64175e-05	6.6611e-05	5.85304e-05	6.71244e-05	8.01072e-05	6.51428e-05	6.02933e-05	5.72449e-05	6.55433e-05	6.3431e-05	2.97091e-05	3.27038e-05	3.59552e-05	3.81892e-05	3.69368e-05	3.8983e-05	3.72772e-05	3.77331e-05
1:Antistreptavidin IgG2 HC	362	K362+Glycation	+Glycation	1:N353-K384 = 3686.7199m(K362+Glycation)	NQVSLTCLVKGFYPSDIAVEWESNGQPENNYK	8.9033e-05	4.63383e-05	0.000104813	8.29759e-05	9.93369e-05	0.000109875	0.000273108	0.000312364	0.000297131	0.000302619	0.000366903	0.00038	4.83886e-05	9.80517e-05	9.9257e-05	0.000278016	0.000297051	0.000332214	0.000150038	0.000118246	8.49695e-05	0.000166108	0.000174206	0.000171582	2.78111e-05	9.27608e-05	7.20393e-05	0.000116708	0.000269613	0.000308035	6.81375e-05	8.78895e-05	0.000103404	0.000147761	0.000133849	0.000132915	0.000156057	0.000123727	0.000131004	0.00032277	0.000333567	0.000339865	0.000165054	0.000172186
1:Antistreptavidin IgG2 HC	368	D368(D368N)[GAC] (1 base change)	Sequence Variant (1 base change)	1:G363-K384 = 2543.1241m(D368N)	GFYPSDIAVEWESNGQPENNYK	6.5957e-05	7.47594e-05	8.0956e-05	7.30918e-05	9.34074e-05	6.06427e-05	5.19213e-05	9.20913e-05	8.84878e-05	5.98354e-05	7.31501e-05	8.28691e-05	7.21606e-05	6.75311e-05	7.90933e-05	0.000100551	7.66809e-05	7.52749e-05	4.5129e-05	9.70609e-05	7.61281e-05	6.78008e-05	6.88671e-05	6.04751e-05	8.36806e-05	2.24962e-05	4.09093e-05	4.86993e-05	2.75303e-05	6.09912e-05	3.03201e-05	9.76586e-05	6.72528e-05	5.74963e-05	0.000117767	9.65666e-05	5.06007e-05	4.68773e-05	5.74353e-05	4.63101e-05	3.66756e-05	5.67102e-05	4.43784e-05	5.36631e-05
1:Antistreptavidin IgG2 HC	370	A370(A370T)[GCC] (1 base change)	Sequence Variant (1 base change)	1:G363-K384 = 2543.1241m(A370T)	GFYPSDIAVEWESNGQPENNYK	6.14155e-05	6.66815e-05	0.000101246	6.75452e-05	7.82841e-05	7.38726e-05	9.03629e-05	8.39487e-05	8.12158e-05	9.53733e-05	7.5483e-05	9.24884e-05	5.8424e-05	4.62417e-05	6.91998e-05	6.60293e-05	6.63234e-05	4.45321e-05	7.02815e-05	8.57038e-05	6.781e-05	7.37616e-05	8.41244e-05	7.78768e-05	7.59929e-05	6.08577e-05	7.93049e-05	0.000107362	9.4027e-05	7.24787e-05	8.49022e-05	7.80055e-05	9.87699e-05	8.60183e-05	0.000125076	0.000111764	3.84674e-05	4.79029e-05	4.67088e-05	4.54997e-05	4.31603e-05	5.21667e-05	4.8401e-05	4.37164e-05
1:Antistreptavidin IgG2 HC	375	S375(S375N)[AGC] (1 base change)	Sequence Variant (1 base change)	1:G363-K384 = 2543.1241m(S375N)	GFYPSDIAVEWESNGQPENNYK	0.000143207	0.000121785	0.000158881	0.000192138	0.000178428	0.000150304	0.000164524	0.000173597	0.000150235	0.000164985	0.000150029	0.000190136	6.82813e-05	0.000208577	0.000156842	0.000122868	0.000163963	0.000164388	0.000184321	0.000177239	0.000133663	0.000180884	0.000162907	0.000192492	0.000140502	0.000168431	0.000130498	0.000161828	0.000147072	0.000200086	0.000141986	0.000155886	0.000166571	0.000155688	0.000207147	0.000224686	9.50309e-05	0.000131696	0.000134287	0.000100444	0.000104374	9.85744e-05	0.000136288	0.000135753
1:Antistreptavidin IgG2 HC	376	~N376+Deamidation	+Deamidation	1:G363-K384 = 2543.1241m(~N376+Deamidation)	GFYPSDIAVEWESNGQPENNYK	0.0105427	0.0109181	0.0136207	0.0131464	0.0130646	0.011802	0.0251999	0.0261317	0.0254569	0.0259899	0.0274919	0.0274569	0.00638336	0.0191449	0.0131017	0.0248847	0.0248027	0.0258021	0.0157513	0.0162723	0.0156838	0.0175719	0.017125	0.0173515	0.0115835	0.0130035	0.0131653	0.0258295	0.025889	0.0276539	0.0138738	0.0144219	0.017571	0.0161349	0.0182543	0.0177738	0.00926109	0.00998884	0.00992362	0.019904	0.0203646	0.02068	0.012418	0.0116656
1:Antistreptavidin IgG2 HC	376	~N376+NH3 loss	+NH3 loss	1:G363-K384 = 2543.1241m(~N376+NH3 loss)	GFYPSDIAVEWESNGQPENNYK	0.0160912	0.0168784	0.0182815	0.0177468	0.0162495	0.0154714	0.0177051	0.0174913	0.0177109	0.0172623	0.0187905	0.0177843	0.0102641	0.0250847	0.0186551	0.0180294	0.0180331	0.0182283	0.0179695	0.0178873	0.0173128	0.0185917	0.0175567	0.0176986	0.0150201	0.0168578	0.0169949	0.0177449	0.0181364	0.0190487	0.0153791	0.014985	0.018883	0.0163058	0.0185066	0.017577	0.0119823	0.0119953	0.0116652	0.0119329	0.0118487	0.0120906	0.011877	0.0119818
1:Antistreptavidin IgG2 HC	382	~N382+NH3 loss	+NH3 loss	1:G363-K384 = 2543.1241m(~N382+NH3 loss)	GFYPSDIAVEWESNGQPENNYK	0.0040716	0.0042539	0.00453617	0.00401832	0.00413229	0.00402523	0.00513157	0.00529618	0.00519668	0.0051611	0.0055164	0.00534844	0.00364005	0.00669408	0.00442137	0.00525689	0.00506756	0.00505385	0.004282	0.00447751	0.00428223	0.00476771	0.00453132	0.00459709	0.00370895	0.00434555	0.00408872	0.00521206	0.00524777	0.00588013	0.0038807	0.00362225	0.00467339	0.00429514	0.00449868	0.00440941	0.00280861	0.00272303	0.0028091	0.00330735	0.00326746	0.00339823	0.00277794	0.00283206
1:Antistreptavidin IgG2 HC	384	K384+Glycation	+Glycation	1:G363-K401 = 4430.0001m(K384+Glycation)	GFYPSDIAVEWESNGQPENNYKTTPPMLDSDGSFFLYSK	0.00034644	0.000193255	0.000369265	0.000378245	0.000317484	0.000270573	0.000477101	0.000553181	0.000499164	0.000506583	0.000603188	0.000502636	0.000163081	0.000176014	0.000276417	0.000460493	0.000503106	0.000445252	0.000369011	0.000278111	0.000232787	0.000415996	0.000313974	0.00038519	0.000152555	0.000281837	0.000245961	0.000208711	0.000352603	0.000378372	0.000181038	0.000182594	0.000177833	0.000385913	0.000155594	0.00024026	0.000534896	0.000512983	0.000509273	0.000789244	0.000758006	0.000741217	0.000551866	0.000528157
1:Antistreptavidin IgG2 HC	389	M389(M389I)[ATG] (1 base change)	Sequence Variant (1 base change)	1:T385-K401 = 1904.8866m(M389I)	TTPPMLDSDGSFFLYSK	0.000143222	0.000106957	0.000136352	0.000154213	0.000144988	0.000129284	0.000137256	0.00014563	0.000145518	0.000144434	0.000140853	0.000125383	9.40047e-05	9.8108e-05	0.000141582	0.000157659	0.000145994	0.000156337	0.000146619	0.000142959	0.000141524	0.000159917	0.000131494	0.000162334	0.000166678	0.000131031	0.000154823	0.000147909	0.000180571	0.000142921	0.00012785	0.000147234	0.000132178	0.000144853	0.000150491	0.000152307	9.20945e-05	8.64954e-05	8.50053e-05	8.38288e-05	8.54335e-05	8.70795e-05	8.57848e-05	8.45578e-05
1:Antistreptavidin IgG2 HC	393	D393+H2O loss	+H2O loss	1:T385-K401 = 1904.8866m(D393+H2O loss)	TTPPMLDSDGSFFLYSK	0.00537794	0.00439009	0.00566903	0.00583673	0.00567644	0.00550479	0.00629253	0.00671784	0.00664923	0.00663507	0.00653339	0.00590898	0.00439343	0.00565292	0.00581767	0.00665542	0.006495	0.00684785	0.00606438	0.00639222	0.00625626	0.00649298	0.00661938	0.00706373	0.00620048	0.0052998	0.00613547	0.00519048	0.00660128	0.00585236	0.00577424	0.00608543	0.00610507	0.00567509	0.00660332	0.00647279	0.00446976	0.00418182	0.00425217	0.004432	0.00454895	0.00460696	0.00462432	0.00444919
1:Antistreptavidin IgG2 HC	400	S400(S400N)[AGC] (1 base change)	Sequence Variant (1 base change)	1:T385-K401 = 1904.8866m(S400N)	TTPPMLDSDGSFFLYSK	0.000189732	0.000159048	0.000190981	0.00021018	0.000185791	0.000200089	0.000222171	0.000207576	0.000205637	0.000241882	0.000197581	0.000205012	0.000153249	0.000152809	0.000208557	0.000220171	0.000209016	0.000190756	0.000196388	0.000211364	0.000211118	0.000221688	0.00021361	0.000230952	0.000198055	0.000144069	0.000194176	0.000301566	0.000229314	0.000222511	0.000149156	0.000194938	0.000194204	0.000163057	0.000209662	0.000212524	0.000138037	0.00013608	0.000120963	0.000125713	0.000131357	0.000128908	0.000137825	0.000136223
1:Antistreptavidin IgG2 HC	420	M420+Oxidation	+Oxidation	1:W409-K431 = 2801.2439m(M420+Oxidation)	WQQGNVFSCSVMHEALHNHYTQK	0.00742847	0.00856736	0.00825136	0.00816949	0.00833597	0.00812616	0.0153201	0.0155936	0.0151858	0.0159212	0.0156336	0.0154748	0.0100847	0.00867459	0.00961286	0.0152673	0.0152269	0.0156526	0.00937871	0.00910614	0.00909157	0.0100044	0.009236	0.0100229	0.0100648	0.00726542	0.00732702	0.0163982	0.0177457	0.0120322	0.00842426	0.0087388	0.00824103	0.0126869	0.0113926	0.0108617	0.00676156	0.00630826	0.00688292	0.0111595	0.0119497	0.0121706	0.00709911	0.00668147
1:Antistreptavidin IgG2 HC	420	M420(M420I)[ATG] (1 base change)	Sequence Variant (1 base change)	1:W409-K431 = 2801.2439m(M420I)	WQQGNVFSCSVMHEALHNHYTQK	0.000318493	0.000341258	0.000356568	0.000355905	0.000363041	0.000339164	0.000341516	0.0003458	0.000340102	0.000337846	0.000352542	0.000364873	0.000398646	0.000274437	0.000389988	0.000355243	0.000352406	0.00035548	0.000381678	0.000356379	0.000350723	0.000357987	0.000322906	0.00035554	0.000459263	0.000315137	0.000323613	0.000437391	0.000361677	0.000336154	0.0002673	0.000353527	0.000365997	0.000323614	0.000374583	0.000357498	0.000290071	0.000285434	0.000314609	0.000320639	0.000325475	0.000326597	0.00033997	0.000338661
1:Antistreptavidin IgG2 HC	426	N426+Deamidation	+Deamidation	1:W409-K431 = 2801.2439m(N426+Deamidation)	WQQGNVFSCSVMHEALHNHYTQK	0.00276075	0.00297092	0.00298207	0.00319676	0.00320243	0.00305063	0.00377661	0.00344496	0.00360849	0.00353703	0.00381855	0.00361098	0.00346095	0.00222604	0.00358785	0.00393533	0.00389192	0.00362866	0.0035858	0.00330118	0.00335692	0.00345144	0.00314234	0.00347289	0.00314144	0.00251572	0.00233781	0.00370681	0.00311878	0.00290015	0.00239975	0.0027168	0.00247566	0.00290484	0.00319695	0.00244925	0.00304428	0.00287599	0.0032504	0.00383685	0.00390069	0.0040118	0.00340663	0.0038813
1:Antistreptavidin IgG2 HC	426	N426+NH3 loss	+NH3 loss	1:W409-K431 = 2801.2439m(N426+NH3 loss)	WQQGNVFSCSVMHEALHNHYTQK	0.00471298	0.0052014	0.00544332	0.00535232	0.00547045	0.00527464	0.00531364	0.00533897	0.00554193	0.0054021	0.0054753	0.00567209	0.00546923	0.00461628	0.00590591	0.00576596	0.005596	0.0056709	0.00579458	0.00556507	0.00551042	0.00551252	0.00527141	0.00572338	0.00535635	0.00405279	0.00394486	0.00522432	0.0043018	0.00423504	0.0039759	0.00433328	0.00427815	0.00536803	0.00453944	0.00445615	0.00483764	0.0048748	0.00526931	0.00507991	0.0055658	0.00543292	0.0055282	0.00547486
1:Antistreptavidin IgG2 HC	436	S436(S436N)[TCT] (2 base change)	Sequence Variant (2 base change)	1:S432-G438 = 659.34901m(S436N)	SLSLSPG	0.000551264	0.000549318	0.000570881	0.000566814	0.000607974	0.00053397	0.000579824	0.000611709	0.000514186	0.000574675	0.000530226	0.000531716	0.000481852	0.000506128	0.000584331	0.000563426	0.000560331	0.00051157	0.000509149	0.000570466	0.000562047	0.000597696	0.000592026	0.000616433	0.000525616	0.000451246	0.000510438	0.000562204	0.000472511	0.000511999	0.000494085	0.000509258	0.000513373	0.000552919	0.000502007	0.000578694	0.000547501	0.00053609	0.000469622	0.000575327	0.000557848	0.000524313	0.00051254	0.000539938
1:Antistreptavidin IgG2 HC	438	G438-58.0054	Unknown Modification	1:S432-G438 = 659.34901m(G438-58.0054)	SLSLSPG	0.00136899	0.00092477	0.00128422	0.00133611	0.00131205	0.0013775	0.0012754	0.00132936	0.00125977	0.00133439	0.00132111	0.00133757	0.00141052	0.00105155	0.00131432	0.00132245	0.00129156	0.00132773	0.00134501	0.00134397	0.00130199	0.00136737	0.00135109	0.00140756	0.0013232	0.00148781	0.00144394	0.00134815	0.00140019	0.00138749	0.00127136	0.00137906	0.00125434	0.00143976	0.00132839	0.00139405	0.000823236	0.000870585	0.000846198	0.000958609	0.000900631	0.000871511	0.000882215	0.000899405
1:Antistreptavidin IgG2 HC	438	G438+Lys	+Lys	1:S432-G438 = 659.34901m(G438+Lys)	SLSLSPG	0.0305935	0.0245718	0.0265037	0.0262862	0.0255941	0.0276405	0.0251049	0.0245293	0.0228309	0.0261748	0.0241036	0.0249592	0.0309084	0.0320692	0.0262496	0.0244296	0.024218	0.0250408	0.0270787	0.025731	0.0259573	0.0253844	0.0278091	0.0255295	0.0319028	0.0333077	0.0340003	0.0324119	0.036593	0.037335	0.0391158	0.0331221	0.0343746	0.031408	0.0224	0.0223384	0.018006	0.018186	0.017698	0.019098	0.0189023	0.0188	0.01819	0.0181964
2:Antistreptavidin IgG2 LC	1	Q1+17.0265	N-Terminal Gln	2:Q1-R17 = 1676.8482m(Q1+17.0265)	QSVVTQPPSVSGAPGQR	0.0134495	0.0105976	0.012268	0.0131664	0.012746	0.0129878	0.00048432	0.00050745	0.000506711	0.000499511	0.000498366	0.000509207	0.0141621	0.0146286	0.0138014	0.000512437	0.000519847	0.000514896	0.0121909	0.0130075	0.0117767	0.0111039	0.0105443	0.0110163	0.0140641	0.0115921	0.0111649	0.000531895	0.000586853	0.00052383	0.0098725	0.0122889	0.00935337	0.0138938	0.011564	0.0118224	0.00917791	0.00906131	0.0089752	0.000353962	0.000358286	0.000350525	0.00818388	0.00838018
2:Antistreptavidin IgG2 LC	2	S2+N-term clip	N-term Clip	2:S2-R17 = 1565.8162m[nonspecific]	SVVTQPPSVSGAPGQR	0.00097704	0.000814504	0.000977786	0.00103622	0.00100889	0.00100106	0.00758195	0.00815523	0.00809813	0.00823017	0.00810835	0.0081443	0.00126351	0.00128268	0.00114775	0.0081751	0.00800024	0.00812717	0.00183612	0.00193766	0.0018033	0.00270117	0.00257924	0.00264078	0.00101728	0.0009668	0.000959949	0.00856838	0.00935043	0.00862796	0.00164409	0.00181979	0.00136584	0.00321388	0.00265958	0.00272898	0.000643938	0.000658794	0.00064254	0.00467175	0.00463162	0.00467577	0.00108896	0.00110534
2:Antistreptavidin IgG2 LC	5	~T5+GalNAc	O-Glycan	2:Q1-R17 = 1676.8482m(~T5+GalNAc)	QSVVTQPPSVSGAPGQR	0.000181076	0.00022518	0.000161014	0.000226692	0.00021318	0.000165736	0.0001743	0.000183614	0.000182824	0.000190379	0.000188062	0.000178128	0.000224468	0.00022083	0.000213468	0.00017332	0.00018525	0.000182243	0.000214551	0.00021425	0.000190098	0.000193589	0.000167966	0.000188631	0.000158655	0.000181421	0.000121359	0.000167043	0.000189752	0.000158117	0.000162424	0.000182957	0.000156353	0.000173359	0.000210627	0.000198185	0.000197466	0.000165494	0.000164377	0.000152643	0.000142878	0.000149669	0.000186798	0.000216929
2:Antistreptavidin IgG2 LC	14	P14+Hydroxylation	+Hydroxylation	2:Q1-R17 = 1676.8482m(P14+Hydroxylation)	QSVVTQPPSVSGAPGQR	0.00243254	0.00232936	0.00229882	0.00240952	0.00244765	0.00232963	0.00239242	0.00237372	0.00239545	0.0023874	0.00229949	0.00236401	0.00263691	0.00325138	0.00272785	0.00246866	0.00249565	0.00245205	0.00251635	0.00234752	0.00250823	0.00253063	0.0021833	0.00251909	0.00231126	0.00244941	0.00173903	0.00226991	0.00268267	0.00241804	0.00242114	0.00262717	0.00227918	0.00254171	0.00267955	0.00259376	0.00182814	0.00186762	0.00183922	0.00182224	0.00178532	0.00177833	0.00189459	0.00194014
2:Antistreptavidin IgG2 LC	17	R17(R17K)[AGG] (1 base change)	Sequence Variant (1 base change)	2:Q1-R17 = 1676.8482m(R17K)	QSVVTQPPSVSGAPGQR	0.000210591	0.000194721	0.000183337	0.000220436	0.000225348	0.000206442	0.000209845	0.000225706	0.000235876	0.000238163	0.000235012	0.000249459	0.000213622	0.000257484	0.000244165	0.000228354	0.000234327	0.000238693	0.00021986	0.000237084	0.000243169	0.000241662	0.000208573	0.000230087	0.000239133	0.000197603	0.000201043	0.000227273	0.00023544	0.00021652	0.000208323	0.000229141	0.000196151	0.00019776	0.000241597	0.000242004	0.000140627	0.000150649	0.00014543	0.000149119	0.000175643	0.000186535	0.000185791	0.000169429
2:Antistreptavidin IgG2 LC	24	G24(G24R)[GGG] (1 base change)	Sequence Variant (1 base change)	2:V18-G24 = 737.3266m(G24R)	VTISCTG	8.40001e-05	0.000113938	0.000115692	0.000118525	0.000105829	0.000105905	0.00011093	0.000105569	0.000107749	0.000115119	0.000103264	0.000113188	0.000155887	0.000237214	0.000171	0.000122202	0.000115588	0.000124906	0.000140558	0.000110756	0.000138073	0.000129498	0.000136964	0.000119188	0.000219784	0.000264132	0.000240458	0.0002021	0.000286322	0.000290015	0.000326906	0.000214564	0.000269025	0.000189556	0.000120712	0.000113481	1.96305e-05	2.27664e-05	2.29225e-05	2.37174e-05	2.1812e-05	2.5548e-05	2.39719e-05	2.26088e-05
2:Antistreptavidin IgG2 LC	28	N28(N28K)[AAC] (1 base change)	Sequence Variant (1 base change)	2:V18-N28 = 1112.4656m(N28K)	VTISCTGSSSN	4.57257e-05	7.90735e-05	6.68606e-05	6.87192e-05	7.39671e-05	7.55463e-05	7.34904e-05	7.22245e-05	7.9375e-05	7.46446e-05	7.52564e-05	7.63323e-05	9.44257e-05	0.000140842	9.76008e-05	7.13574e-05	8.50114e-05	8.76741e-05	9.55761e-05	7.33635e-05	9.03313e-05	7.77476e-05	9.85086e-05	8.25899e-05	0.000122666	0.000149756	0.000121325	0.000114432	0.00015389	0.00017661	0.000173268	0.000109896	0.000163314	0.000109997	7.89263e-05	7.64412e-05	2.05555e-05	1.60463e-05	1.86427e-05	1.76339e-05	2.17208e-05	1.85096e-05	2.02283e-05	1.83943e-05
2:Antistreptavidin IgG2 LC	30	G30(G30R)[GGG] (1 base change)	Sequence Variant (1 base change)	2:V18-G30 = 1282.5711m(G30R)	VTISCTGSSSNIG	7.19012e-05	0.000103186	0.000106465	9.69304e-05	0.000109424	0.000100284	0.000100584	0.000105157	0.00010634	0.00011049	0.000108712	0.000106411	0.000128422	0.000111642	0.000129762	0.000107216	0.000110468	0.000115613	0.000129314	0.000107019	0.000107834	0.00011965	0.000124371	0.000118838	0.000134664	0.000193535	0.000118077	0.000126353	0.000171381	0.000176643	0.000171185	0.000117433	0.000138993	9.61525e-05	0.00012008	0.000109388	3.17701e-05	3.22816e-05	3.3512e-05	3.36155e-05	3.70767e-05	3.26693e-05	3.6799e-05	3.42411e-05
2:Antistreptavidin IgG2 LC	32	G32+N-term clip	N-term Clip	2:G32-K47 = 1858.9002m[nonspecific]	GYDVHWYQQLPGTAPK	0.000172097	0.000181172	0.000183022	0.000200349	0.000170594	0.00016971	0.0003394	0.000467017	0.000356711	0.000322413	0.000323887	0.000380809	0.000293844	0.0002545	0.000208968	0.000296969	0.000311239	0.000339486	0.000270043	0.000218622	0.000216589	0.00025309	0.000263168	0.000220466	0.00033885	0.000267494	0.000181637	0.000438197	0.000497962	0.000558662	0.00023992	0.000227597	0.000286061	0.000221992	0.000187446	0.000136537	7.46511e-05	5.27948e-05	4.22917e-05	9.06164e-05	8.41541e-05	8.17659e-05	5.89188e-05	6.22072e-05
2:Antistreptavidin IgG2 LC	36	H36(H36Q)[CAC] (1 base change)	Sequence Variant (1 base change)	2:V18-K47 = 3194.4979m(H36Q)	VTISCTGSSSNIGAGYDVHWYQQLPGTAPK	7.81618e-05	8.83687e-05	0.000108206	0.000107869	0.000103875	7.81568e-05	0.00012704	9.6972e-05	0.000111805	0.000123766	0.000120321	0.000100441	8.00314e-05	0.000103212	0.000119693	0.000117694	0.000104045	8.36258e-05	0.000122481	9.74813e-05	0.00012207	0.00012172	9.05608e-05	0.00012377	6.63469e-05	0.000103999	9.39064e-05	0.00010129	0.00012084	9.72493e-05	8.36122e-05	9.66699e-05	0.000120282	0.000113714	0.000112514	0.000120834	8.75522e-05	8.62182e-05	8.57131e-05	8.85521e-05	8.37662e-05	8.83844e-05	9.27912e-05	9.33044e-05
2:Antistreptavidin IgG2 LC	37	W37+Double Oxidation	+Double Oxidation	2:V18-K47 = 3194.4979m(W37+Double Oxidation)	VTISCTGSSSNIGAGYDVHWYQQLPGTAPK	0.000612111	0.000308492	0.000510604	0.000441603	0.000493656	0.000591962	0.000591927	0.000498177	0.000501147	0.00055795	0.000630808	0.000448099	0.000660611	0.00119893	0.000778416	0.000716946	0.000644614	0.00057927	0.000938141	0.000754058	0.000706774	0.000660832	0.000611043	0.00068281	0.00359359	0.00634859	0.0049722	0.00507756	0.00397855	0.00538275	0.00479467	0.00339271	0.0052674	0.00687683	0.00378164	0.00387966	0.000804555	0.000818898	0.00062313	0.000684839	0.000571729	0.000488621	0.000728079	0.000643703
2:Antistreptavidin IgG2 LC	37	W37+Oxidation	+Oxidation	2:V18-K47 = 3194.4979m(W37+Oxidation)	VTISCTGSSSNIGAGYDVHWYQQLPGTAPK	0.000496285	0.0004732	0.000629641	0.000605786	0.000434058	0.000593828	0.000561703	0.000594699	0.000612321	0.000625311	0.000636347	0.000732178	0.000324272	0.000560476	0.000711991	0.000611581	0.000540043	0.000615198	0.000614319	0.000685139	0.000654237	0.000541802	0.000605986	0.000666818	0.000370849	0.000599826	0.000545597	0.000608508	0.000682912	0.000676591	0.000571225	0.000579979	0.000699656	0.000892974	0.000578505	0.000673192	0.000607914	0.000540423	0.000521443	0.000551607	0.000540419	0.0005683	0.000595585	0.000554391
2:Antistreptavidin IgG2 LC	48	L48(L48F)[CTC] (1 base change)	Sequence Variant (1 base change)	2:L48-R63 = 1756.9220m(L48F)	LLIYGNSNRPSGVPDR	0.000120627	0.000122631	0.00013268	0.000130531	0.000126777	0.000123009	0.0001195	0.000126029	0.000123829	0.000130179	0.000123532	0.000116924	0.000109154	0.000151391	0.000131993	0.000121247	0.000128552	0.000130619	0.000125191	0.00012382	0.000142818	0.000130104	0.000133092	0.000130236	0.000126683	0.000125787	0.000145326	0.000136968	0.000126276	0.000123066	0.000140449	0.000131505	0.000166663	0.000149709	0.000153483	0.000138393	0.000111717	0.000115435	0.000136472	0.000115497	0.000136005	0.00012915	0.000114416	0.000114332
2:Antistreptavidin IgG2 LC	52	G52(G52D)[GGT] (1 base change)	Sequence Variant (1 base change)	2:L48-R63 = 1756.9220m(G52D)	LLIYGNSNRPSGVPDR	4.87352e-05	3.55382e-05	6.29105e-05	5.41122e-05	3.95429e-05	5.61477e-05	3.89682e-05	3.60778e-05	4.26242e-05	4.15797e-05	4.19816e-05	4.57092e-05	2.99348e-05	6.3262e-05	4.92515e-05	3.20887e-05	3.69785e-05	3.19555e-05	5.14361e-05	5.14867e-05	4.40178e-05	7.03729e-05	4.29824e-05	6.13002e-05	3.92074e-05	3.62295e-05	2.31714e-05	4.09948e-05	3.48484e-05	2.67889e-05	3.06778e-05	2.96609e-05	4.43133e-05	2.86165e-05	4.30711e-05	4.73844e-05	3.55562e-05	3.2452e-05	3.14144e-05	4.86236e-05	6.31889e-05	2.87527e-05	4.30907e-05	2.68475e-05
2:Antistreptavidin IgG2 LC	53	N53(N53K)[AAC] (1 base change)	Sequence Variant (1 base change)	2:L48-N53 = 691.39048m(N53K)	LLIYGN	3.63712e-05	2.90823e-05	3.63532e-05	3.36309e-05	3.51978e-05	3.56106e-05	3.37656e-05	3.19543e-05	3.40854e-05	3.26231e-05	3.08912e-05	3.448e-05	4.17224e-05	5.06912e-05	4.13601e-05	3.58414e-05	3.70215e-05	3.70864e-05	3.82086e-05	3.53428e-05	3.63261e-05	3.85951e-05	4.01509e-05	3.54142e-05	4.89217e-05	4.64799e-05	5.7548e-05	5.49635e-05	5.21268e-05	5.24883e-05	5.83307e-05	5.14743e-05	4.96922e-05	5.08578e-05	3.89518e-05	4.12449e-05	1.54735e-05	1.87038e-05	2.24697e-05	1.85747e-05	2.18968e-05	2.0688e-05	1.92535e-05	1.89527e-05
2:Antistreptavidin IgG2 LC	53	N53+Deamidation	+Deamidation	2:L48-R63 = 1756.9220m(N53+Deamidation)	LLIYGNSNRPSGVPDR	0.00475016	0.00477909	0.00491273	0.00488731	0.00513276	0.00497934	0.0133313	0.0127875	0.0132549	0.0135116	0.0127056	0.01281	0.00453262	0.00701549	0.00497367	0.0131442	0.013694	0.0135431	0.00572483	0.00550828	0.00605793	0.00705859	0.0067129	0.00693239	0.00458336	0.00431244	0.00430515	0.0129244	0.0122722	0.0119104	0.00549317	0.00529002	0.00654204	0.00548353	0.0064772	0.00654707	0.00406197	0.00420335	0.00506985	0.0144591	0.0155034	0.0142807	0.00544277	0.00555812
2:Antistreptavidin IgG2 LC	54	~S54+GalNAc-3SG	O-Glycan	2:L48-R63 = 1756.9220m(~S54+GalNAc-3SG)	LLIYGNSNRPSGVPDR	0.00020782	0.000193167	0.000235789	0.000233268	0.000230971	0.000214731	0.000216273	0.000210176	0.000213347	0.000210781	0.000199075	0.000202923	0.000198421	0.000300076	0.000226862	0.000206416	0.000218056	0.000217374	0.000214871	0.000210894	0.000242521	0.000230748	0.000216531	0.000230301	0.000150787	0.000168066	0.000133335	0.000152331	0.000145643	0.000142933	0.000160297	0.000152791	0.000192397	0.000130168	0.000219794	0.000225728	0.000293495	0.000295615	0.000348178	0.000312522	0.000340318	0.000318975	0.000346759	0.000350283
2:Antistreptavidin IgG2 LC	59	G59(G59E)[GGG] (1 base change)	Sequence Variant (1 base change)	2:L48-R63 = 1756.9220m(G59E)	LLIYGNSNRPSGVPDR	4.71945e-05	4.77641e-05	4.4648e-05	4.90382e-05	4.89568e-05	4.37058e-05	5.18234e-05	5.19305e-05	4.93768e-05	4.85284e-05	4.74299e-05	4.87459e-05	3.89264e-05	4.45241e-05	4.98909e-05	4.79889e-05	5.18317e-05	4.94782e-05	5.23609e-05	4.98278e-05	5.29526e-05	4.88468e-05	4.93473e-05	4.56695e-05	4.16689e-05	4.24116e-05	3.99622e-05	5.1011e-05	5.06352e-05	4.70713e-05	4.08534e-05	4.15234e-05	5.80528e-05	4.56491e-05	5.21409e-05	4.71687e-05	3.54301e-05	3.53551e-05	4.43045e-05	4.02161e-05	4.95197e-05	4.653e-05	4.42988e-05	3.76462e-05
2:Antistreptavidin IgG2 LC	83	E83(E83K)[GAG] (1 base change)	Sequence Variant (1 base change)	2:S69-E83 = 1404.7096m(E83K)	SGTSASLAITGLQAE	0.000306815	0.000461884	0.000403967	0.000375089	0.00044838	0.000446718	0.000482861	0.000480713	0.000487904	0.000446188	0.000342646	0.000374067	0.000836381	0.000421871	0.000462816	0.000501545	0.000504352	0.000487077	0.000547962	0.000517663	0.000649114	0.000469207	0.000431135	0.00047763	0.000749291	0.000717569	0.00042352	0.000793458	0.000430396	0.000509441	0.00056979	0.000480591	0.000457084	0.000182819	0.000710952	0.000499537	0.000100911	8.73407e-05	9.39139e-05	0.00010053	9.07788e-05	9.4771e-05	8.81359e-05	0.000107576
2:Antistreptavidin IgG2 LC	98	S98+N-term clip	N-term Clip	2:S98-K108 = 1128.5815m[nonspecific]	SGLYVFGTGTK	0.00291172	0.00718102	0.00327904	0.00500052	0.00516421	0.00332444	0.0195004	0.0208051	0.0186111	0.0178678	0.0141746	0.0136514	0.0118313	0.00376741	0.00448589	0.018051	0.0172824	0.0167342	0.00812428	0.0089978	0.00762658	0.0071132	0.00805159	0.00620829	0.0133699	0.00986066	0.00998397	0.0628292	0.0365717	0.0430483	0.0131583	0.0108933	0.0113008	0.00543075	0.0167575	0.0118733	0.00147553	0.000733662	0.000888035	0.00395424	0.00332872	0.0036966	0.00148489	0.00178316
2:Antistreptavidin IgG2 LC	100	L100+N-term clip	N-term Clip	2:L100-K108 = 984.5280m[nonspecific]	LYVFGTGTK	9.53115e-05	0.000139503	9.74165e-05	0.000118866	0.000101638	9.02783e-05	0.000284949	0.000364863	0.000282259	0.000235037	0.00021878	0.000290895	0.000385587	9.19794e-05	0.000109508	0.000248757	0.000220644	0.000233481	0.000210226	0.000188584	0.000152796	0.00015817	0.000181816	0.000121296	0.00032259	0.000216454	0.000194111	0.00121075	0.000740058	0.000735492	0.000595814	0.000206897	0.000194913	0.000152212	0.000291132	0.000224148	3.28097e-05	1.58129e-05	1.08062e-05	3.91619e-05	3.85901e-05	3.8501e-05	2.77342e-05	2.50758e-05
2:Antistreptavidin IgG2 LC	108	K108+Glycation	+Glycation	2:S69-K116 = 5035.3808m(K108+Glycation)	SGTSASLAITGLQAEDEADYYCQSYDSSLSGLYVFGTGTKVTVLGQPK	0.00173807	0.00148395	0.00206079	0.00195293	0.00202456	0.00204253	0.00654694	0.00755335	0.00665296	0.00965463	0.00695475	0.00612249	0.00159993	0.00220792	0.00196981	0.00612169	0.0058852	0.00700645	0.0039312	0.00239829	0.00282198	0.00290984	0.00336765	0.00304187	0.00131295	0.00222676	0.00217656	0.00632006	0.00735874	0.0068667	0.00348753	0.00215113	0.00278804	0.00318867	0.00398801	0.00287466	0.00127772	0.00133855	0.00123904	0.00403139	0.00422381	0.00410048	0.0021258	0.00244751
2:Antistreptavidin IgG2 LC	109	V109(V109I)[GTC] (1 base change)	Sequence Variant (1 base change)	2:V109-K116 = 840.5069m(V109I)	VTVLGQPK	9.52264e-05	0.000118912	0.000112574	0.000112324	0.000107555	0.000108604	0.000111174	0.000109828	0.000107005	0.000115946	0.000116403	0.00010157	0.000119697	0.000113565	0.000119772	0.000116855	0.000109249	0.000111028	0.000106924	0.000111346	0.00011506	0.000107957	0.000114036	0.00011136	0.000126301	0.000131404	0.000143229	0.000117738	0.000128989	0.000119258	0.000114092	0.000129339	0.000118035	0.000101546	0.000128324	0.00012008	6.15636e-05	7.05606e-05	7.29214e-05	6.49437e-05	6.59529e-05	6.70675e-05	6.60182e-05	7.32652e-05
2:Antistreptavidin IgG2 LC	111	V111(V111A)[GTC] (1 base change)	Sequence Variant (1 base change)	2:V109-K116 = 840.5069m(V111A)	VTVLGQPK	2.7508e-05	2.98734e-05	2.99934e-05	3.03806e-05	3.21984e-05	3.32945e-05	3.13112e-05	3.2237e-05	3.11903e-05	3.19479e-05	3.10956e-05	3.18483e-05	3.32477e-05	3.54394e-05	3.29348e-05	3.54938e-05	3.39369e-05	3.41398e-05	3.23446e-05	3.26654e-05	3.38913e-05	3.31152e-05	3.51477e-05	3.12043e-05	3.48875e-05	3.13429e-05	3.57356e-05	3.48978e-05	3.61506e-05	3.65445e-05	3.53711e-05	3.40398e-05	3.49623e-05	3.9341e-05	3.36089e-05	3.38862e-05	1.61604e-05	1.64067e-05	1.75351e-05	2.05327e-05	1.87919e-05	1.95198e-05	1.87322e-05	1.96598e-05
2:Antistreptavidin IgG2 LC	111	V111(V111I)[GTC] (1 base change)	Sequence Variant (1 base change)	2:V109-K116 = 840.5069m(V111I)	VTVLGQPK	0.000218927	0.000243231	0.000230869	0.000230588	0.00024004	0.000225575	0.000234331	0.000219727	0.000238804	0.000225838	0.00023492	0.000239312	0.000250172	0.000204956	0.000250055	0.000246777	0.000250063	0.000250348	0.00023546	0.000223995	0.000241319	0.000240417	0.000225051	0.000235899	0.000247174	0.000264686	0.000262771	0.000254213	0.000249651	0.000247829	0.000221968	0.000251664	0.000242769	0.000260135	0.000255455	0.000240203	0.000132101	0.000151387	0.000141194	0.000151621	0.000149284	0.000145329	0.000157559	0.000154234
2:Antistreptavidin IgG2 LC	114	Q114+Deamidation	+Deamidation	2:V109-K116 = 840.5069m(Q114+Deamidation)	VTVLGQPK	6.73102e-05	6.6124e-05	6.48692e-05	6.27383e-05	6.06671e-05	6.30731e-05	0.000788825	0.00077004	0.000759597	0.000755153	0.000770438	0.000748527	6.34039e-05	6.72312e-05	6.4485e-05	0.000774172	0.000768123	0.000771873	0.000127364	0.000135515	0.000134833	0.000200186	0.000204115	0.000203835	8.96184e-05	8.83062e-05	8.90738e-05	0.00081727	0.000872201	0.000877344	0.000144781	0.000158105	0.000160115	0.000234079	0.000225227	0.000208553	1.98892e-05	2.1708e-05	3.03789e-05	0.000419602	0.000421366	0.000387646	7.08579e-05	6.8633e-05
2:Antistreptavidin IgG2 LC	144	D144+H2O loss	+H2O loss	2:A136-K155 = 2211.1286m(D144+H2O loss)	ATLVCLISDFYPGAVTVAWK	7.25711e-05	5.56095e-05	7.28177e-05	7.41778e-05	7.77718e-05	8.29113e-05	8.94452e-05	9.47695e-05	9.72047e-05	9.81738e-05	0.00010785	9.98821e-05	7.35297e-05	9.41157e-05	8.79295e-05	9.58393e-05	0.000102025	9.7891e-05	4.79504e-05	9.18808e-05	9.50957e-05	9.0246e-05	8.91679e-05	9.8573e-05	7.36189e-05	5.73705e-05	8.56003e-05	8.58041e-05	9.52299e-05	8.33218e-05	7.99547e-05	8.29529e-05	7.46519e-05	9.80783e-05	0.000103017	8.82091e-05	3.91521e-05	4.15141e-05	4.63688e-05	4.76018e-05	6.09115e-05	6.12549e-05	4.92058e-05	5.11173e-05
2:Antistreptavidin IgG2 LC	144	D144(D144G)[GAC] (1 base change)	Sequence Variant (1 base change)	2:A136-K155 = 2211.1286m(D144G)	ATLVCLISDFYPGAVTVAWK	0.00337131	0.00265108	0.00342278	0.00303538	0.00300069	0.00227339	0.0027485	0.00376316	0.00318024	0.00250451	0.00281393	0.0035001	0.00246004	0.00484056	0.00253438	0.00354125	0.00344535	0.003018	0.00168799	0.0036948	0.00289985	0.00337447	0.00303684	0.00245283	0.00256618	0.00267213	0.00225629	0.00205881	0.0022132	0.00195274	0.00186796	0.00158476	0.00159573	0.00211677	0.0341325	0.00182202	0.00145621	0.00223297	0.00175353	0.00233454	0.00211707	0.00191586	0.00171608	0.00235783
2:Antistreptavidin IgG2 LC	154	W154+Double Oxidation	+Double Oxidation	2:A136-K155 = 2211.1286m(W154+Double Oxidation)	ATLVCLISDFYPGAVTVAWK	0.00157026	0.00254885	0.00319075	0.00166732	0.00232807	0.00251694	0.00189725	0.00133789	0.000996233	0.00139508	0.00144	0.0016607	0.00344159	0.00307297	0.00501131	0.00236581	0.00424682	0.00407425	0.00390395	0.00422315	0.00362396	0.00154831	0.00175614	0.00152895	0.0086546	0.00823519	0.00724571	0.00623383	0.00424379	0.00580983	0.00549259	0.00504834	0.00506184	0.00612877	0.00504849	0.00540587	0.00507465	0.00242605	0.00247624	0.00322287	0.00314442	0.00137471	0.00418	0.00424015
2:Antistreptavidin IgG2 LC	154	W154+Oxidation	+Oxidation	2:A136-K155 = 2211.1286m(W154+Oxidation)	ATLVCLISDFYPGAVTVAWK	0.000516506	0.000509176	0.000574339	0.00050799	0.000547595	0.000817443	0.000572241	0.000535377	0.000543901	0.000502875	0.000561285	0.000563942	0.000559598	0.000596284	0.000641007	0.000548708	0.000610302	0.000624664	0.000399638	0.00055924	0.000599308	0.000578924	0.000516471	0.000549522	0.000713952	0.000581506	0.000589931	0.000637232	0.000550227	0.000558958	0.000512199	0.000533211	0.00050764	0.000784998	0.000534917	0.000548971	0.000501287	0.00049122	0.000444778	0.000521563	0.000512553	0.000523568	0.000551846	0.000514513
2:Antistreptavidin IgG2 LC	154	W154+Oxidation to kynurenine	+Oxidation to kynurenine	2:A136-K155 = 2211.1286m(W154+Oxidation to kynurenine)	ATLVCLISDFYPGAVTVAWK	0.000128871	0.000286586	0.000362342	0.000151877	0.000292653	0.000298621	0.000242259	0.00014354	0.000110193	0.000184954	0.000165441	0.000208562	0.000642068	0.000398632	0.000632899	0.000331096	0.000548399	0.00068023	0.000559278	0.000570931	0.000530804	0.000177661	0.000197886	0.000192766	0.00050761	0.00051567	0.000426352	0.000361557	0.000299435	0.000329922	0.000294204	0.000310084	0.000369599	0.000346049	0.00030805	0.0003297	0.0003689	0.000195472	0.000215985	0.000283807	0.000256822	0.000133054	0.000386583	0.000355931
2:Antistreptavidin IgG2 LC	155	K155+Glycation	+Glycation	2:A136-K162 = 2895.4728m(K155+Glycation)	ATLVCLISDFYPGAVTVAWKADSSPVK	0.011803	0.00961056	0.0122625	0.0119113	0.0113787	0.0115932	0.0314173	0.0354538	0.0356039	0.0330606	0.0370641	0.0376427	0.0121538	0.0102719	0.0108412	0.0329961	0.0337866	0.0359824	0.0119825	0.0138834	0.011293	0.0172517	0.0145643	0.016273	0.00914484	0.00954886	0.0108186	0.0291274	0.0320611	0.0242814	0.0114718	0.0126128	0.0118378	0.0191142	0.0199947	0.017653	0.0130474	0.0132481	0.0131382	0.0451993	0.0472115	0.0477204	0.0175623	0.0171846
2:Antistreptavidin IgG2 LC	162	K162+Glycation	+Glycation	2:A156-K172 = 1673.8472m(K162+Glycation)	ADSSPVKAGVETTTPSK	0.000913537	0.000862749	0.000805781	0.000970157	0.0010302	0.000851852	0.00102301	0.00132229	0.00136894	0.00131203	0.00129973	0.00129317	0.000935208	0.00115905	0.00094398	0.00133486	0.00134838	0.0011992	0.000880861	0.000775901	0.000955435	0.000919227	0.00107138	0.00104917	0.00093531	0.000934199	0.000679162	0.000842655	0.00118109	0.00118308	0.000979704	0.00084539	0.00068454	0.000623901	0.00103298	0.00102407	0.000406348	0.000514651	0.000430966	0.000599828	0.000472526	0.000596846	0.000523082	0.000541161
2:Antistreptavidin IgG2 LC	164	G164(G164E)[GGA] (1 base change)	Sequence Variant (1 base change)	2:A163-K172 = 989.5029m(G164E)	AGVETTTPSK	0.00010965	0.000106097	0.000107303	0.000106931	0.000104378	0.000108059	0.000104878	0.000103199	0.000106125	0.000111994	0.000109908	0.000106525	0.000109102	9.85907e-05	0.000116135	0.000112017	0.000111404	0.000114428	0.000108731	0.000110684	0.000106581	0.000104415	0.000107611	0.000113677	8.7345e-05	8.16555e-05	5.5776e-05	9.01501e-05	8.12812e-05	8.09204e-05	7.2748e-05	7.72704e-05	9.10925e-05	8.9437e-05	9.42388e-05	7.94472e-05	5.86583e-05	6.01013e-05	6.45833e-05	6.58222e-05	6.25871e-05	6.37127e-05	6.0384e-05	6.37203e-05
2:Antistreptavidin IgG2 LC	165	V165(V165M)[GTG] (1 base change)	Sequence Variant (1 base change)	2:A163-K172 = 989.5029m(V165M)	AGVETTTPSK	6.89715e-05	6.41784e-05	7.3455e-05	5.43644e-05	6.94623e-05	5.05733e-05	5.74247e-05	5.24154e-05	5.28556e-05	5.25167e-05	4.99664e-05	5.2782e-05	5.32024e-05	6.00732e-05	5.59405e-05	5.15807e-05	4.8677e-05	5.46921e-05	5.43226e-05	5.33693e-05	4.83258e-05	5.39463e-05	5.07608e-05	5.27459e-05	5.49974e-05	5.52761e-05	3.95608e-05	5.43151e-05	4.84433e-05	5.00828e-05	5.35759e-05	5.06227e-05	5.17977e-05	4.5783e-05	5.06451e-05	4.90534e-05	3.10811e-05	3.08935e-05	3.49173e-05	3.06125e-05	2.93351e-05	3.11762e-05	2.98295e-05	3.11806e-05
2:Antistreptavidin IgG2 LC	177	K177+Glycation	+Glycation	2:Q173-K192 = 2314.1230m(K177+Glycation)	QSNNKYAASSYLSLTPEQWK	0.00072732	0.000948448	0.000954947	0.000989726	0.00100445	0.00104719	0.00188407	0.00195199	0.00183169	0.00189852	0.0017957	0.00209688	0.000932306	0.000894326	0.0011433	0.00181894	0.00186171	0.00197459	0.00117823	0.00104425	0.00120034	0.00122061	0.00114221	0.00114635	0.00120809	0.00103205	0.00107285	0.00214636	0.00191338	0.00223495	0.000966541	0.00128853	0.00136177	0.000996873	0.00125433	0.00129131	0.000629287	0.000589027	0.000596419	0.00115972	0.00116532	0.00125331	0.00069893	0.000715886
2:Antistreptavidin IgG2 LC	185	S185(S185R)[AGC] (1 base change)	Sequence Variant (1 base change)	2:Y178-S185 = 860.3916m(S185R)	YAASSYLS	0.000188475	0.000267226	0.000245938	0.000273371	0.000271818	0.000287951	0.000299142	0.000283497	0.000278842	0.000302936	0.000295574	0.000294942	0.000369059	0.000380309	0.000321858	0.000268879	0.000299249	0.000308095	0.000340682	0.000250581	0.000292077	0.000289324	0.000305621	0.000293057	0.000380066	0.000361648	0.000346717	0.000390404	0.000463979	0.000436758	0.000505743	0.000412533	0.000410418	0.000296692	0.000300398	0.00030176	0.000105883	0.000109394	0.000113107	0.000152205	0.000143732	0.000143239	0.000131219	0.000129928
2:Antistreptavidin IgG2 LC	185	S185(S185N)[AGC] (1 base change)	Sequence Variant (1 base change)	2:Y178-K192 = 1742.8516m(S185N)	YAASSYLSLTPEQWK	0.000580002	0.000517875	0.000560893	0.000569063	0.000559757	0.000572155	0.000567192	0.000583148	0.0005935	0.00058683	0.000568346	0.000610099	0.00051499	0.000586592	0.000629705	0.000590479	0.000597825	0.000640287	0.000588745	0.0005913	0.000603314	0.0006102	0.000616947	0.000605368	0.000571646	0.000577085	0.000631217	0.000646552	0.000640449	0.00066325	0.000619559	0.000678553	0.000655735	0.000633207	0.000631102	0.000643286	0.000382023	0.000371683	0.000390274	0.000397644	0.000413194	0.000441056	0.000399664	0.0004061
2:Antistreptavidin IgG2 LC	191	W191+Double Oxidation	+Double Oxidation	2:Y178-K192 = 1742.8516m(W191+Double Oxidation)	YAASSYLSLTPEQWK	0.000204544	8.43997e-05	0.000171096	0.000182608	0.000193517	0.000292502	0.000278799	0.000240794	0.000159452	0.000227077	0.000360368	0.00022805	0.000424476	0.000467847	0.000326037	0.000380587	0.000252634	0.00033272	0.000370709	0.000378054	0.00031083	0.000297119	0.000256037	0.000263847	0.00226671	0.00281523	0.00256058	0.00337852	0.00196877	0.00282875	0.00223158	0.00219937	0.00277445	0.00276346	0.00183813	0.00219725	0.000410736	0.000467162	0.000379785	0.000410048	0.000335739	0.000348497	0.000464745	0.000369465
2:Antistreptavidin IgG2 LC	191	W191+Oxidation	+Oxidation	2:Y178-K192 = 1742.8516m(W191+Oxidation)	YAASSYLSLTPEQWK	0.000291402	0.000289984	0.000327549	0.000334202	0.00031848	0.00053454	0.000479618	0.000439226	0.000453957	0.000461602	0.000477724	0.000490082	0.00032911	0.000355775	0.000406753	0.000468001	0.000452453	0.000488206	0.000410415	0.000304706	0.000400836	0.000384361	0.000354961	0.000390303	0.000650211	0.000560359	0.000587343	0.000777947	0.000677854	0.000809374	0.000602772	0.000656491	0.000734854	0.00057447	0.000578851	0.000617516	0.000251687	0.000263199	0.000253302	0.000318529	0.000324705	0.000381455	0.000294172	0.000280393
2:Antistreptavidin IgG2 LC	192	K192+Glycation	+Glycation	2:Y178-R195 = 2123.0436m(K192+Glycation)	YAASSYLSLTPEQWKSHR	0.000959543	0.00120921	0.00116756	0.00122401	0.00128245	0.00137278	0.00412571	0.00410953	0.00421011	0.00448561	0.00430357	0.00411837	0.00136857	0.00214778	0.00143709	0.00418592	0.00444401	0.0045362	0.00177269	0.00146046	0.00170659	0.00195306	0.00199055	0.00184311	0.00147593	0.00154477	0.00163264	0.00503482	0.00457739	0.00482134	0.00191462	0.0020316	0.00198143	0.00129744	0.00175683	0.00174097	0.000388437	0.000397473	0.000411502	0.00139727	0.00147156	0.00154777	0.00056379	0.000587025
2:Antistreptavidin IgG2 LC	196	S196(S196N)[AGC] (1 base change)	Sequence Variant (1 base change)	2:S196-K210 = 1711.7359m(S196N)	SYSCQVTHEGSTVEK	4.87865e-05	3.22023e-05	5.50169e-05	5.1892e-05	5.26814e-05	6.04804e-05	6.36755e-05	6.81548e-05	4.71707e-05	6.97968e-05	6.27265e-05	7.309e-05	5.06565e-05	4.48696e-05	6.26426e-05	6.01398e-05	6.72475e-05	4.72608e-05	5.7367e-05	5.10379e-05	4.52334e-05	4.36e-05	4.53157e-05	7.68171e-05	7.92585e-05	5.04084e-05	3.44931e-05	6.40145e-05	9.02888e-05	5.56115e-05	8.40378e-05	8.46713e-05	4.73811e-05	5.44592e-05	5.29545e-05	7.00874e-05	4.01867e-05	4.49231e-05	4.9383e-05	4.37068e-05	6.13873e-05	6.55962e-05	5.53374e-05	4.46892e-05
2:Antistreptavidin IgG2 LC	198	S198(S198N)[AGC] (1 base change)	Sequence Variant (1 base change)	2:S196-K210 = 1711.7359m(S198N)	SYSCQVTHEGSTVEK	0.000382731	0.000431015	0.00048648	0.000455004	0.000492117	0.000444046	0.00048253	0.00051104	0.000529829	0.000477117	0.000492479	0.000514422	0.000472736	0.000378636	0.000498989	0.000483994	0.000471346	0.00050323	0.000520303	0.000503228	0.000483608	0.000495403	0.000512775	0.000507903	0.000541186	0.000501366	0.000449174	0.000588836	0.000549629	0.000520035	0.000513617	0.000519085	0.000546606	0.000572773	0.000547629	0.000541175	0.000426179	0.000362798	0.000449722	0.000410974	0.000452901	0.000476075	0.000477414	0.000440534
2:Antistreptavidin IgG2 LC	201	V201(V201I)[GTC] (1 base change)	Sequence Variant (1 base change)	2:S196-K210 = 1711.7359m(V201I)	SYSCQVTHEGSTVEK	6.79438e-05	8.84094e-05	9.35455e-05	9.7056e-05	9.06397e-05	8.24859e-05	9.67551e-05	9.65459e-05	0.000100307	9.75637e-05	9.69636e-05	9.62994e-05	9.57301e-05	5.92914e-05	9.59519e-05	9.81415e-05	9.62036e-05	0.000101424	9.36007e-05	9.2399e-05	9.10343e-05	9.24689e-05	9.39793e-05	9.45555e-05	9.22619e-05	8.92029e-05	8.96088e-05	0.000127254	9.88853e-05	9.45808e-05	8.38404e-05	8.93964e-05	9.61833e-05	0.00011877	0.000111617	0.00010311	7.18357e-05	6.78467e-05	7.9869e-05	8.82026e-05	8.82995e-05	9.14676e-05	9.7881e-05	9.47727e-05
2:Antistreptavidin IgG2 LC	201	V201(V201M)[GTC] (2 base change)	Sequence Variant (2 base change)	2:S196-K210 = 1711.7359m(V201M)	SYSCQVTHEGSTVEK	5.57804e-05	6.16056e-05	6.18462e-05	5.46955e-05	5.99027e-05	6.60625e-05	6.14232e-05	6.04909e-05	6.22159e-05	6.18917e-05	5.98817e-05	5.95659e-05	6.72331e-05	3.09188e-05	6.53578e-05	6.05107e-05	6.50579e-05	6.11561e-05	6.70071e-05	6.58114e-05	6.57478e-05	6.35889e-05	6.18146e-05	6.20855e-05	6.66513e-05	6.47739e-05	5.69065e-05	8.23073e-05	6.83785e-05	6.63684e-05	7.11555e-05	7.43892e-05	6.78556e-05	8.99758e-05	6.76291e-05	7.37345e-05	5.71528e-05	5.61429e-05	6.1261e-05	5.67858e-05	6.21881e-05	6.43773e-05	7.03107e-05	6.45168e-05
2:Antistreptavidin IgG2 LC	203	H203(H203Q)[CAT] (1 base change)	Sequence Variant (1 base change)	2:S196-K210 = 1711.7359m(H203Q)	SYSCQVTHEGSTVEK	1.91802e-05	2.30853e-05	2.75251e-05	2.48004e-05	2.42555e-05	2.35829e-05	2.84579e-05	2.95123e-05	2.7291e-05	2.84939e-05	3.21769e-05	2.88045e-05	2.19866e-05	1.53959e-05	2.57047e-05	2.85128e-05	2.56565e-05	2.90854e-05	2.58388e-05	2.92362e-05	2.83792e-05	2.97384e-05	2.7188e-05	2.96308e-05	1.49206e-05	1.74019e-05	2.05502e-05	2.08253e-05	2.13682e-05	1.54553e-05	1.85253e-05	2.2669e-05	2.25551e-05	1.75026e-05	3.30953e-05	3.55856e-05	5.7122e-05	5.63434e-05	6.20569e-05	6.05709e-05	6.15256e-05	6.01011e-05	6.73774e-05	5.97242e-05
2:Antistreptavidin IgG2 LC	205	G205(G205D)[GGG] (2 base change)	Sequence Variant (2 base change)	2:S196-K210 = 1711.7359m(G205D)	SYSCQVTHEGSTVEK	6.52903e-05	7.52897e-05	8.66048e-05	8.38887e-05	8.64247e-05	7.11442e-05	9.1875e-05	9.23563e-05	8.02936e-05	8.02367e-05	8.59216e-05	9.24979e-05	8.26868e-05	4.5526e-05	6.5619e-05	7.30534e-05	7.08557e-05	8.04843e-05	7.7927e-05	6.88634e-05	7.22024e-05	7.04147e-05	8.45724e-05	7.45231e-05	6.62498e-05	7.11027e-05	9.36414e-05	9.98371e-05	8.43413e-05	8.75859e-05	8.47582e-05	8.74092e-05	9.51788e-05	9.70563e-05	6.08461e-05	9.38414e-05	0.000101308	6.68096e-05	8.74603e-05	8.48491e-05	9.06698e-05	9.62585e-05	9.44336e-05	8.42212e-05
2:Antistreptavidin IgG2 LC	206	S206(S206N)[AGC] (1 base change)	Sequence Variant (1 base change)	2:S196-K210 = 1711.7359m(S206N)	SYSCQVTHEGSTVEK	0.000142506	0.000160127	0.000178118	0.000174429	0.000173349	0.000171395	0.000191017	0.000186839	0.000190452	0.000189677	0.000192103	0.00017336	0.000191983	0.000143812	0.000184662	0.000181525	0.000186788	0.000179667	0.000199787	0.000191861	0.000190499	0.000191877	0.000201569	0.000181615	0.000191378	0.000195441	0.000240273	0.000234878	0.000205033	0.000192049	0.000197998	0.000199903	0.000209209	0.000243392	0.000199953	0.000211971	0.00016191	0.000159805	0.000173439	0.000173227	0.000200788	0.000200061	0.000208231	0.000184723
2:Antistreptavidin IgG2 LC	210	K210+Glycation	+Glycation	2:S196-S218 = 2558.0789m(K210+Glycation)	SYSCQVTHEGSTVEKTVAPTECS	0.000239257	0.000270725	0.00030633	0.000290715	0.000321409	0.000288992	0.00118656	0.00125213	0.00129297	0.0012328	0.00121414	0.0012024	0.000200984	0.000149602	0.000314323	0.00118722	0.00120466	0.00122381	0.000382823	0.000394169	0.00044255	0.000510169	0.000471007	0.000535677	0.000231088	0.000284718	0.000303704	0.00107347	0.000899128	0.000784342	0.000288112	0.000344511	0.000344869	0.000527361	0.000553606	0.000653851	0.000575142	0.000552671	0.00068116	0.00223406	0.00258485	0.00255353	0.000983036	0.000879942
[truncated: 17 more columns]

## Sheet: Reference abundance
Antistreptavidin IgG2 Reference Runs
(a-Calibration)
Protein Sequence
>Antistreptavidin IgG2 HC
QLQLQESGPGLVKPSGTLSLTCAVSGGSISSGNWWSWVRQPPGKGLEWIGEISHSGTTNYNPSLKSRVTISGDKSKNQFSLELTSVTAADTAVYYCARNFDYWGQGTLVTVSSASTKGPSVFPLAPCSRSTSESTAALGCLVKDYFPEPVTVSWNSGALTSGVHTFPAVLQSSGLYSLSSVVTVPSSNFGTQTYTCNVDHKPSNTKVDKTVERKCCVECPPCPAPPVAGPSVFLFPPKPKDTLMISRTPEVTCVVVDVSHEDPEVQFNWYVDGVEVHNAKTKPREEQFNSTFRVVSVLTVVHQDWLNGKEYKCKVSNKGLPAPIEKTISKTKGQPREPQVYTLPPSREEMTKNQVSLTCLVKGFYPSDIAVEWESNGQPENNYKTTPPMLDSDGSFFLY…
>Antistreptavidin IgG2 LC
QSVVTQPPSVSGAPGQRVTISCTGSSSNIGAGYDVHWYQQLPGTAPKLLIYGNSNRPSGVPDRFSGSKSGTSASLAITGLQAEDEADYYCQSYDSSLSGLYVFGTGTKVTVLGQPKANPTVTLFPPSSEELQANKATLVCLISDFYPGAVTVAWKADSSPVKAGVETTTPSKQSNNKYAASSYLSLTPEQWKSHRSYSCQVTHEGSTVEKTVAPTECS
Protease = Trypsin
Cleaves at C-terminus of KR
Key Data Processing Parameters
MS Noise Level = 3600
S/N Threshold = 331
Typical Chromatographic Peak Width = 0.14
Maximum Chromatographic Peak Width = 1.61
Mass Tolerance = 5 ppm
Max Time Shift before Alignment = 3.18 min
Maximum Peptide Mass = 6800
Mass Accuracy = 6 ppm
Disulfide Bonds = Reduced
Glycosylation = CHO Glycan
Crosslinks = No
Minimum Confidence = 0.8
Mass Changes for Unspecified Modifications = -58 - 17
Amino Acid Substitutions = Common misincorporations
Ion Selection Criteria for Quantitation
Peptide Selection Criteria = 50% of the most abundant peptide
Charge Selection Criteria = 33% of the most abundant charge state
File Name						ATS_Try_C1	ATS_Try_C2	ATS_Try_C3	ATS_Try_C4	ATS_Try_C5	ATS_Try_C6
Sample Name						Antistreptavidin_Try_control	Antistreptavidin_Try_control	Antistreptavidin_Try_control	Antistreptavidin_Try_control	Antistreptavidin_Try_control	Antistreptavidin_Try_control
Sample Id						2	3	4	5	6	7
Comment						Expt #1, Column peptide CSH15cm, HPLC:Knox, Biospin desalting	Expt #1, Column peptide CSH15cm, HPLC:Knox, Biospin desalting	Expt #1, Column peptide CSH15cm, HPLC:Knox, Biospin desalting	Expt #1, Column peptide CSH15cm, HPLC:Knox, Biospin desalting	Expt #1, Column peptide CSH15cm, HPLC:Knox, Biospin desalting	Expt #1, Column peptide CSH15cm, HPLC:Knox, Biospin desalting
Injection Time (h)						0	1.09389	2.18833	3.28278	4.37694	5.47139
Quality Controls
			Relative Load			0.344	0.311	0.346	0.309	0.323	0.325
			Identification Rate (by area)			0.6626	0.665	0.6705	0.6657	0.6731	0.6753
			Abundance of Top Unidentified (> 500 Da, relative to top identified)			0.2513	0.2827	0.2934	0.291	0.2416	0.2968
			Digestion Efficiency			1	1	1	1	1	1
			Intensity&Length-Weighted Sequence Coverage			0.462	0.4558	0.4655	0.4639	0.4659	0.461
			Ions (Modified) Meeting Selection Criteria for Quantitation			264	262	264	265	265	265
Protein	Residue #	Modification	Category	Modified Peptides	Peptide Sequence	Abundance	Abundance	Abundance	Abundance	Abundance	Abundance	Average	RSD	pooled STDEV	Avg/pld STDEV	Attribute type
1:Antistreptavidin IgG2 HC	1	Q1+17.0265	N-Terminal Extension	1:Q1-R39 = 4113.0266m(Q1+17.0265)	QLQLQESGPGLVKPSGTLSLTCAVSGGSISSGNWWSWVR	0.0187473	0.0118289	0.0202715	0.0199527	0.0171268	0.0182502	0.0176962	0.174878	0.00237938	7.43733	2
1:Antistreptavidin IgG2 HC	13	K13+Glycation	+Glycation	1:Q1-R39 = 4113.0266m(K13+Glycation)	QLQLQESGPGLVKPSGTLSLTCAVSGGSISSGNWWSWVR	0.000126549	9.33757e-05	0.000173786	0.00014199	0.000201563	0.000195748	0.000155502	0.27217	3.04468e-05	5.10733	1
1:Antistreptavidin IgG2 HC	30	S30+C-term clip	C-term Clip	1:Q1-S30 = 2954.4907m[nonspecific]	QLQLQESGPGLVKPSGTLSLTCAVSGGSIS	0.000433739	0.000172498	0.000388103	0.000403956	0.000287098	0.000319969	0.000334227	0.287753	7.20311e-05	4.64004	3
1:Antistreptavidin IgG2 HC	31	S31+N-term clip	N-term Clip	1:S31-R39 = 1176.5465m[nonspecific]	SGNWWSWVR	0.00139803	0.00126306	0.00142459	0.0013677	0.00113456	0.00115577	0.00129062	0.097224	0.000594081	2.17246	3
1:Antistreptavidin IgG2 HC	34	~W34+Double Oxidation	+Double Oxidation	1:Q1-R39 = 4113.0266m(~W34+Double Oxidation)	QLQLQESGPGLVKPSGTLSLTCAVSGGSISSGNWWSWVR	0.00090453	0.000832936	0.000793238	0.000797032	0.000733838	0.00100482	0.000844399	0.114289	0.000239818	3.521	3
1:Antistreptavidin IgG2 HC	34	~W34+Oxidation to kynurenine	+Oxidation to kynurenine	1:Q1-R39 = 4113.0266m(~W34+Oxidation to kynurenine)	QLQLQESGPGLVKPSGTLSLTCAVSGGSISSGNWWSWVR	0.000550886	0.000870536	0.00144599	0.00131685	0.00121302	0.00147411	0.00114523	0.317573	0.000254645	4.49737	3
1:Antistreptavidin IgG2 HC	37	~W37+Double Oxidation	+Double Oxidation	1:Q1-R39 = 4113.0266m(~W37+Double Oxidation)	QLQLQESGPGLVKPSGTLSLTCAVSGGSISSGNWWSWVR	0.000710412	0.00083464	0.000900585	0.000632287	0.000827038	0.000904444	0.000801568	0.135629	0.000219965	3.64406	3
1:Antistreptavidin IgG2 HC	44	K44+Glycation	+Glycation	1:Q40-K65 = 2809.4035m(K44+Glycation)	QPPGKGLEWIGEISHSGTTNYNPSLK	0.000332118	0.000321062	0.000413817	0.00040137	0.000379943	0.000435354	0.000380611	0.11999	4.16958e-05	9.12826	1
1:Antistreptavidin IgG2 HC	48	W48+Double Oxidation	+Double Oxidation	1:G45-K65 = 2302.1230m(W48+Double Oxidation)	GLEWIGEISHSGTTNYNPSLK	0.000289722	0.000210947	0.000263339	0.000245553	0.00027182	0.000366684	0.000274677	0.190834	0.000136018	2.01943	3
1:Antistreptavidin IgG2 HC	48	W48+Oxidation	+Oxidation	1:G45-K65 = 2302.1230m(W48+Oxidation)	GLEWIGEISHSGTTNYNPSLK	6.59064e-05	9.29058e-05	9.29838e-05	9.9605e-05	9.75478e-05	0.000108254	9.28671e-05	0.154623	1.05247e-05	8.82371	3
1:Antistreptavidin IgG2 HC	55	S55+C-term clip	C-term Clip	1:G45-S55 = 1226.5932m[nonspecific]	GLEWIGEISHS	4.8546e-05	3.73505e-05	4.80984e-05	8.85545e-05	4.51942e-05	3.80358e-05	5.09632e-05	0.373629	1.88239e-05	2.70737	3
1:Antistreptavidin IgG2 HC	56	G56(G56R)[GGG] (1 base change)	Sequence Variant (1 base change)	1:G45-G56 = 1283.6146m(G56R)	GLEWIGEISHSG	3.06494e-05	4.2104e-05	4.06485e-05	4.2902e-05	4.23812e-05	4.58887e-05	4.07623e-05	0.128679	5.45187e-06	7.47676	1
1:Antistreptavidin IgG2 HC	56	G56+N-term clip	N-term Clip	1:G56-K65 = 1093.5404m[nonspecific]	GTTNYNPSLK	7.41679e-05	8.72278e-05	7.91148e-05	9.1191e-05	7.7665e-05	8.05456e-05	8.1652e-05	0.0777766	1.41862e-05	5.75572	3
1:Antistreptavidin IgG2 HC	59	N59(N59K)[AAC] (1 base change)	Sequence Variant (1 base change)	1:G45-N59 = 1599.7529m(N59K)	GLEWIGEISHSGTTN	6.8508e-05	8.60213e-05	7.38085e-05	7.6208e-05	7.43499e-05	8.17916e-05	7.67812e-05	0.0811274	7.19571e-06	10.6704	1
1:Antistreptavidin IgG2 HC	65	K65+Glycation	+Glycation	1:G45-R67 = 2545.2561m(K65+Glycation)	GLEWIGEISHSGTTNYNPSLKSR	0.000308789	0.000383478	0.000360944	0.000369222	0.00037446	0.000414999	0.000368649	0.0943185	3.52952e-05	10.4447	1
1:Antistreptavidin IgG2 HC	67	R67(R67Q)[CGA] (1 base change)	Sequence Variant (1 base change)	1:S66-K74 = 961.5193m(R67Q)	SRVTISGDK	7.29519e-05	8.81554e-05	7.76619e-05	8.3543e-05	8.81033e-05	6.9215e-05	7.99384e-05	0.0994752	8.03538e-05	0.99483	1
1:Antistreptavidin IgG2 HC	68	V68(V68I)[GTC] (1 base change)	Sequence Variant (1 base change)	1:V68-K74 = 718.38612m(V68I)	VTISGDK	9.30746e-05	8.72497e-05	8.47996e-05	8.89177e-05	0.000103995	9.13902e-05	9.15711e-05	0.0737782	7.98366e-05	1.14698	1
1:Antistreptavidin IgG2 HC	107	~T107+GalNAc-3SG	O-Glycan	1:N99-K117 = 2059.9851m(~T107+GalNAc-3SG)	NFDYWGQGTLVTVSSASTK	0.000219621	0.000287716	0.000271945	0.000312432	0.000269998	0.000341355	0.000283845	0.146092	8.607e-05	3.29783	1
1:Antistreptavidin IgG2 HC	107	T107+N-term clip	N-term Clip	1:T107-K117 = 1092.6027m[nonspecific]	TLVTVSSASTK	3.56447e-05	4.74251e-05	3.00044e-05	5.12003e-05	3.03165e-05	1.10884e-05	3.42799e-05	0.419259	2.88789e-05	1.18702	3
1:Antistreptavidin IgG2 HC	117	K117+Hydroxylation	+Hydroxylation	1:N99-K117 = 2059.9851m(K117+Hydroxylation)	NFDYWGQGTLVTVSSASTK	0.043583	0.0503115	0.0466907	0.0450248	0.0450143	0.0477322	0.0463928	0.051827	0.00361228	12.8431	1
1:Antistreptavidin IgG2 HC	120	~S120+GalNAc-3SG	O-Glycan	1:G118-R129 = 1287.6282m(~S120+GalNAc-3SG)	GPSVFPLAPCSR	0.000104071	7.19541e-05	9.48231e-05	0.000104139	8.97361e-05	9.15438e-05	9.27112e-05	0.128094	1.1454e-05	8.09425	1
1:Antistreptavidin IgG2 HC	121	V121(V121I)[GTC] (1 base change)	Sequence Variant (1 base change)	1:G118-R129 = 1287.6282m(V121I)	GPSVFPLAPCSR	8.43098e-05	0.000101983	9.11422e-05	8.65405e-05	8.23556e-05	8.63428e-05	8.8779e-05	0.0799834	5.76325e-06	15.4043	1
1:Antistreptavidin IgG2 HC	122	F122(F122Y)[TTC] (1 base change)	Sequence Variant (1 base change)	1:G118-R129 = 1287.6282m(F122Y)	GPSVFPLAPCSR	6.76002e-05	8.24702e-05	7.55267e-05	7.95466e-05	8.30128e-05	9.42658e-05	8.04037e-05	0.11008	7.02295e-06	11.4487	1
1:Antistreptavidin IgG2 HC	127	C127+C-term clip	C-term Clip	1:G118-C127 = 1044.4950m[nonspecific]	GPSVFPLAPC	8.36015e-05	0.000496487	8.72917e-05	0.000336596	0.000292604	8.19806e-05	0.00022976	0.753864	0.000127993	1.7951	3
1:Antistreptavidin IgG2 HC	127	C127(C127Y)[TGC] (1 base change)	Sequence Variant (1 base change)	1:G118-R129 = 1287.6282m(C127Y)	GPSVFPLAPCSR	3.32174e-05	3.11406e-05	3.1964e-05	3.5458e-05	2.89326e-05	2.93048e-05	3.16696e-05	0.0775996	3.18888e-06	9.93125	1
1:Antistreptavidin IgG2 HC	129	R129(R129K)[AGG] (1 base change)	Sequence Variant (1 base change)	1:G118-R129 = 1287.6282m(R129K)	GPSVFPLAPCSR	6.52752e-05	7.41133e-05	6.96506e-05	6.27391e-05	6.61001e-05	6.95661e-05	6.79074e-05	0.0593473	3.16433e-06	21.4603	1
1:Antistreptavidin IgG2 HC	131	T131+N-term clip	N-term Clip	1:T131-K143 = 1336.6544m[nonspecific]	TSESTAALGCLVK	8.56171e-05	9.40187e-05	9.03625e-05	0.00010293	0.000109976	7.50847e-05	9.29982e-05	0.133462	1.18773e-05	7.82989	3
1:Antistreptavidin IgG2 HC	132	S132+N-term clip	N-term Clip	1:S132-K143 = 1235.6068m[nonspecific]	SESTAALGCLVK	0.000363259	0.000423155	0.000372073	0.000388403	0.000384175	0.000332653	0.000377286	0.0794361	4.78284e-05	7.88833	3
1:Antistreptavidin IgG2 HC	134	S134(S134N)[AGC] (1 base change)	Sequence Variant (1 base change)	1:S130-K143 = 1423.6865m(S134N)	STSESTAALGCLVK	0.000279328	0.000254318	0.000239622	0.000251709	0.000270741	0.000233716	0.000254906	0.0688569	1.84579e-05	13.8101	1
1:Antistreptavidin IgG2 HC	134	S134+N-term clip	N-term Clip	1:S134-K143 = 1019.5321m[nonspecific]	STAALGCLVK	0.000462103	0.000468894	0.000408905	0.00041862	0.000418347	0.000410942	0.000431302	0.0622712	2.93706e-05	14.6848	3
1:Antistreptavidin IgG2 HC	135	T135+N-term clip	N-term Clip	1:T135-K143 = 932.5001m[nonspecific]	TAALGCLVK	0.000152571	0.00011284	0.000106423	0.00013512	0.00010181	9.96924e-05	0.000118076	0.179503	2.60189e-05	4.53808	3
1:Antistreptavidin IgG2 HC	136	A136(A136T)[GCG] (1 base change)	Sequence Variant (1 base change)	1:S130-K143 = 1423.6865m(A136T)	STSESTAALGCLVK	3.16933e-05	3.11014e-05	3.18696e-05	3.02157e-05	3.39103e-05	3.59449e-05	3.24559e-05	0.064728	2.54714e-06	12.7421	1
1:Antistreptavidin IgG2 HC	140	C140(C140Y)[TGC] (1 base change)	Sequence Variant (1 base change)	1:S130-K143 = 1423.6865m(C140Y)	STSESTAALGCLVK	0.000221345	0.000212757	0.0002077	0.000210836	0.000207962	0.000195618	0.00020937	0.0400128	1.17691e-05	17.7897	1
1:Antistreptavidin IgG2 HC	142	V142(V142I)[GTC] (1 base change)	Sequence Variant (1 base change)	1:S130-K143 = 1423.6865m(V142I)	STSESTAALGCLVK	4.85936e-05	5.59083e-05	4.93642e-05	4.60035e-05	5.08374e-05	4.52367e-05	4.93239e-05	0.0779488	6.02718e-06	8.18359	1
1:Antistreptavidin IgG2 HC	154	~W154+Double Oxidation	+Double Oxidation	1:D144-K206 = 6763.2341m(~W154+Double Oxidation)	DYFPEPVTVSWNSGALTSGVHTFPAVLQSSGLYSLSSVVTVPSSNFGTQTYTCNVDHKPSNTK	0.000983652	0.00072434	0.000900153	0.000691984	0.00083454	0.000944143	0.000846469	0.139947	0.000478993	1.76718	3
1:Antistreptavidin IgG2 HC	154	W154+Oxidation	+Oxidation	1:D144-K206 = 6763.2341m(W154+Oxidation)	DYFPEPVTVSWNSGALTSGVHTFPAVLQSSGLYSLSSVVTVPSSNFGTQTYTCNVDHKPSNTK	0.0147141	0.0115839	0.00999907	0.0148351	0.0150849	0.0138791	0.0133494	0.156072	0.00174125	7.66656	3
1:Antistreptavidin IgG2 HC	155	N155(N155K)[AAC] (1 base change)	Sequence Variant (1 base change)	1:D144-N155 = 1452.6561m(N155K)	DYFPEPVTVSWN	9.63587e-05	0.000109929	0.000112711	9.36143e-05	0.000125018	0.000100952	0.00010643	0.110607	4.1463e-05	2.56688	1
1:Antistreptavidin IgG2 HC	158	A158+N-term clip	N-term Clip	1:A158-K206 = 5184.5350m[nonspecific]	ALTSGVHTFPAVLQSSGLYSLSSVVTVPSSNFGTQTYTCNVDHKPSNTK	9.17805e-05	2.29719e-05	4.7342e-05	2.72618e-05	5.3312e-05	1.85732e-05	4.35402e-05	0.628855	3.09681e-05	1.40597	3
1:Antistreptavidin IgG2 HC	160	T160+C-term clip	C-term Clip	1:D144-T160 = 1881.8785m[nonspecific]	DYFPEPVTVSWNSGALT	2.17607e-05	7.93329e-06	1.48908e-05	4.86908e-05	2.08317e-05	1.27596e-05	2.11445e-05	0.683136	0.000481035	0.0439562	3
1:Antistreptavidin IgG2 HC	161	S161+N-term clip	N-term Clip	1:S161-K206 = 4899.3661m[nonspecific]	SGVHTFPAVLQSSGLYSLSSVVTVPSSNFGTQTYTCNVDHKPSNTK	0.000205076	0.000123961	0.000176309	0.000240576	0.0001952	8.24934e-05	0.000170603	0.33836	0.00115637	0.147532	3
1:Antistreptavidin IgG2 HC	191	T191+N-term clip	N-term Clip	1:T191-K206 = 1893.8527m[nonspecific]	TQTYTCNVDHKPSNTK	0.000171866	0.000240706	0.000253925	0.000239101	0.000265156	0.000229925	0.000233446	0.13965	0.000168608	1.38455	3
1:Antistreptavidin IgG2 HC	199	D199+H2O loss	+H2O loss	1:D144-K206 = 6763.2341m(D199+H2O loss)	DYFPEPVTVSWNSGALTSGVHTFPAVLQSSGLYSLSSVVTVPSSNFGTQTYTCNVDHKPSNTK	0.00568286	0.00409376	0.00460702	0.00570975	0.00614643	0.00553798	0.0052963	0.146805	0.000993962	5.32847	2
1:Antistreptavidin IgG2 HC	238	K238+Glycation	+Glycation	1:C215-K240 = 2911.3305m(K238+Glycation)	CCVECPPCPAPPVAGPSVFLFPPKPK	0.000871095	0.000752019	0.000961746	0.00105227	0.000967368	0.00098316	0.000931276	0.112945	9.3337e-05	9.97757	1
1:Antistreptavidin IgG2 HC	240	K240+Glycation	+Glycation	1:P239-R247 = 1059.5747m(K240+Glycation)	PKDTLMISR	0.00105416	0.00136429	0.00122647	0.0011032	0.00136214	0.00146761	0.00126298	0.128862	0.000225628	5.59762	1
1:Antistreptavidin IgG2 HC	241	D241+H2O loss	Artifact-Detection	1:D241-R247 = 834.42694m(D241+H2O loss)	DTLMISR	0.00405426	0.00446485	0.00505216	0.0044568	0.00448671	0.00456015	0.00451249	0.0707427	0.00045391	9.94137	2
1:Antistreptavidin IgG2 HC	244	M244+Double Oxidation	+Double Oxidation	1:D241-R247 = 834.4269m(M244+Double Oxidation)	DTLMISR	2.56195e-05	2.43979e-05	2.30603e-05	2.68988e-05	1.74006e-05	2.70554e-05	2.40721e-05	0.149693	3.60899e-06	6.67003	3
1:Antistreptavidin IgG2 HC	244	M244+Oxidation	+Oxidation	1:D241-R247 = 834.4269m(M244+Oxidation)	DTLMISR	0.0181451	0.0203881	0.0195532	0.0190087	0.0192003	0.0187459	0.0191736	0.0396362	0.000902959	21.2341	3
1:Antistreptavidin IgG2 HC	244	M244(M244I)[ATG] (1 base change)	Sequence Variant (1 base change)	1:D241-R247 = 834.4269m(M244I)	DTLMISR	0.000125547	0.000126305	0.000125651	0.00013328	0.000137335	0.00013489	0.000130501	0.0404548	7.15296e-06	18.2444	1
1:Antistreptavidin IgG2 HC	259	S259(S259R)[AGC] (1 base change)	Sequence Variant (1 base change)	1:T248-S259 = 1304.6170m(S259R)	TPEVTCVVVDVS	0.000149139	0.000235252	0.000201223	0.000146362	0.000142832	0.00016603	0.000173473	0.214271	3.70527e-05	4.68179	1
1:Antistreptavidin IgG2 HC	262	D262+C-term clip	C-term Clip	1:T248-D262 = 1685.7454m[nonspecific]	TPEVTCVVVDVSHED	0.0022359	0.00439206	0.0043473	0.00462296	0.00504397	0.00586166	0.00441731	0.273262	0.00110078	4.0129	3
1:Antistreptavidin IgG2 HC	268	N268(N268K)[AAC] (1 base change)	Sequence Variant (1 base change)	1:T248-N268 = 2400.0791m(N268K)	TPEVTCVVVDVSHEDPEVQFN	0.000952358	0.000620472	0.00047098	0.000370004	0.00058008	0.000838323	0.000638703	0.344681	0.000197892	3.22753	1
1:Antistreptavidin IgG2 HC	269	W269+Double Oxidation	+Double Oxidation	1:T248-K280 = 3797.7519m(W269+Double Oxidation)	TPEVTCVVVDVSHEDPEVQFNWYVDGVEVHNAK	0.000384548	0.000336589	0.000447315	0.000304638	0.000406434	0.000379285	0.000376468	0.134084	0.000218399	1.72376	3
1:Antistreptavidin IgG2 HC	280	~K280+Glycation	+Glycation	1:T248-R284 = 4280.0484m(~K280+Glycation)	TPEVTCVVVDVSHEDPEVQFNWYVDGVEVHNAKTKPR	0.00457842	0.00657629	0.00446065	0.00548751	0.0044761	0.00380802	0.00489783	0.200539	0.0012472	3.92707	1
1:Antistreptavidin IgG2 HC	289	N289+A1G0	N-Glycan	1:E285-R293 = 1156.5149m(N289+A1G0)	EEQFNSTFR	0.00320377	0.00326143	0.0032082	0.00335826	0.00328488	0.00322929	0.00325764	0.0179155	0.000212239	15.3489	1
1:Antistreptavidin IgG2 HC	289	N289+A1G0F	N-Glycan	1:E285-R293 = 1156.5149m(N289+A1G0F)	EEQFNSTFR	0.0110895	0.0109583	0.0115449	0.0105052	0.011972	0.0111726	0.0112071	0.0449483	0.000351995	31.8388	1
1:Antistreptavidin IgG2 HC	289	N289+A1G0M4	N-Glycan	1:E285-R293 = 1156.5149m(N289+A1G0M4)	EEQFNSTFR	0.000572456	0.000599049	0.000558437	0.000584089	0.000497876	0.000528786	0.000556782	0.0673658	0.000105989	5.2532	1
1:Antistreptavidin IgG2 HC	289	N289+A1G0M5	N-Glycan	1:E285-R293 = 1156.5149m(N289+A1G0M5)	EEQFNSTFR	0.00124596	0.0011986	0.00122276	0.00102199	0.00121109	0.00121602	0.00118607	0.0690487	9.0203e-05	13.1489	1
1:Antistreptavidin IgG2 HC	289	N289+A1G0M5F	N-Glycan	1:E285-R293 = 1156.5149m(N289+A1G0M5F)	EEQFNSTFR	0.00101192	0.00107013	0.000980789	0.000951378	0.00105915	0.00116334	0.00103945	0.0728032	5.91979e-05	17.5589	1
1:Antistreptavidin IgG2 HC	289	N289+A1G1	N-Glycan	1:E285-R293 = 1156.5149m(N289+A1G1)	EEQFNSTFR	0.00247162	0.00244575	0.00247571	0.00258556	0.0023028	0.00248392	0.00246089	0.0370785	6.44152e-05	38.2036	1
1:Antistreptavidin IgG2 HC	289	N289+A1G1F	N-Glycan	1:E285-R293 = 1156.5149m(N289+A1G1F)	EEQFNSTFR	0.0348498	0.0338238	0.0346989	0.0352038	0.0346849	0.0347476	0.0346681	0.0131577	0.000745525	46.5016	1
1:Antistreptavidin IgG2 HC	289	N289+A1G1M4	N-Glycan	1:E285-R293 = 1156.5149m(N289+A1G1M4)	EEQFNSTFR	0.00241281	0.00254382	0.00240168	0.00229936	0.00246245	0.00256682	0.00244782	0.0404363	0.000128351	19.0714	1
1:Antistreptavidin IgG2 HC	289	N289+A1G1M4F	N-Glycan	1:E285-R293 = 1156.5149m(N289+A1G1M4F)	EEQFNSTFR	0.00914736	0.00943513	0.00921293	0.00949309	0.00931592	0.00958699	0.00936524	0.0180897	0.00030613	30.5923	1
1:Antistreptavidin IgG2 HC	289	N289+A1G1M5	N-Glycan	1:E285-R293 = 1156.5149m(N289+A1G1M5)	EEQFNSTFR	0.00725278	0.00705961	0.00708305	0.0063189	0.00686705	0.00754265	0.00702067	0.0586529	0.000550288	12.7582	1
1:Antistreptavidin IgG2 HC	289	N289+A1G1M5F	N-Glycan	1:E285-R293 = 1156.5149m(N289+A1G1M5F)	EEQFNSTFR	0.00911929	0.0094712	0.00894955	0.00844892	0.00868011	0.00944135	0.0090184	0.0453836	0.00048631	18.5446	1
1:Antistreptavidin IgG2 HC	289	N289+A1S1	N-Glycan	1:E285-R293 = 1156.5149m(N289+A1S1)	EEQFNSTFR	0.000228328	0.000313755	0.000312817	0.000282771	0.000280287	0.000314939	0.000288816	0.116375	4.2538e-05	6.7896	1
1:Antistreptavidin IgG2 HC	289	N289+A1S1F	N-Glycan	1:E285-R293 = 1156.5149m(N289+A1S1F)	EEQFNSTFR	0.00580971	0.00736508	0.00713581	0.00624374	0.006988	0.00722583	0.0067947	0.091643	0.000765323	8.87821	1
1:Antistreptavidin IgG2 HC	289	N289+A1S1M4	N-Glycan	1:E285-R293 = 1156.5149m(N289+A1S1M4)	EEQFNSTFR	0.000583443	0.000754887	0.00084318	0.000722239	0.000861017	0.000928507	0.000782212	0.156764	0.000100903	7.75212	1
1:Antistreptavidin IgG2 HC	289	N289+A1S1M4F	N-Glycan	1:E285-R293 = 1156.5149m(N289+A1S1M4F)	EEQFNSTFR	0.00397011	0.00461065	0.00541858	0.00483451	0.00524443	0.00571377	0.00496534	0.126635	0.000566242	8.76894	1
1:Antistreptavidin IgG2 HC	289	N289+A1S1M5	N-Glycan	1:E285-R293 = 1156.5149m(N289+A1S1M5)	EEQFNSTFR	0.00148007	0.00139674	0.00166166	0.00154638	0.0016936	0.00168227	0.00157679	0.0775029	0.000144778	10.8911	1
1:Antistreptavidin IgG2 HC	289	N289+A1S1M5F	N-Glycan	1:E285-R293 = 1156.5149m(N289+A1S1M5F)	EEQFNSTFR	0.00266985	0.00240504	0.00299529	0.0028669	0.00311977	0.0030946	0.00285857	0.0969465	0.000264111	10.8234	1
1:Antistreptavidin IgG2 HC	289	N289+A2G0	N-Glycan	1:E285-R293 = 1156.5149m(N289+A2G0)	EEQFNSTFR	0.014642	0.0152054	0.0156342	0.015617	0.0145781	0.0155488	0.0152043	0.0319802	0.000684399	22.2155	1
1:Antistreptavidin IgG2 HC	289	N289+A2G0F	N-Glycan	1:E285-R293 = 1156.5149m(N289+A2G0F)	EEQFNSTFR	0.4066	0.396462	0.405591	0.405878	0.401641	0.395511	0.401947	0.0122884	0.00795824	50.5071	1
1:Antistreptavidin IgG2 HC	289	N289+A2G1	N-Glycan	1:E285-R293 = 1156.5149m(N289+A2G1)	EEQFNSTFR	0.00859858	0.00805074	0.00817543	0.00866813	0.00853245	0.00873289	0.0084597	0.0330437	0.00027444	30.8254	1
1:Antistreptavidin IgG2 HC	289	N289+A2G1F	N-Glycan	1:E285-R293 = 1156.5149m(N289+A2G1F)	EEQFNSTFR	0.328247	0.329134	0.321628	0.335176	0.326388	0.32395	0.32742	0.0143534	0.00438366	74.6911	1
1:Antistreptavidin IgG2 HC	289	N289+A2G2	N-Glycan	1:E285-R293 = 1156.5149m(N289+A2G2)	EEQFNSTFR	0.00109135	0.00104558	0.00107339	0.00101116	0.00112737	0.00106031	0.00106819	0.0371914	5.00575e-05	21.3393	1
1:Antistreptavidin IgG2 HC	289	N289+A2G2F	N-Glycan	1:E285-R293 = 1156.5149m(N289+A2G2F)	EEQFNSTFR	0.0552181	0.0562293	0.0541785	0.056664	0.0547754	0.0557919	0.0554762	0.0167542	0.00211117	26.2775	1
1:Antistreptavidin IgG2 HC	289	N289+A2S1G0F	N-Glycan	1:E285-R293 = 1156.5149m(N289+A2S1G0F)	EEQFNSTFR	0.0012024	0.00162757	0.00156115	0.0014821	0.0016081	0.00177543	0.00154279	0.124834	0.000155633	9.913	1
1:Antistreptavidin IgG2 HC	289	N289+A2S1G1F	N-Glycan	1:E285-R293 = 1156.5149m(N289+A2S1G1F)	EEQFNSTFR	0.00163358	0.00211031	0.0020594	0.00192052	0.00210486	0.00231344	0.00202368	0.113148	0.000188352	10.7442	1
1:Antistreptavidin IgG2 HC	289	N289+A2S2F	N-Glycan	1:E285-R293 = 1156.5149m(N289+A2S2F)	EEQFNSTFR	0.000227286	0.000267026	0.000373787	0.000368936	0.000385133	0.00039865	0.000336803	0.21172	7.761e-05	4.33969	1
1:Antistreptavidin IgG2 HC	289	N289+A3G1F	N-Glycan	1:E285-R293 = 1156.5149m(N289+A3G1F)	EEQFNSTFR	0.000900421	0.000976628	0.000900825	0.000803096	0.000924947	0.000947647	0.000908927	0.0654178	7.50293e-05	12.1143	1
1:Antistreptavidin IgG2 HC	289	N289+A3G2F	N-Glycan	1:E285-R293 = 1156.5149m(N289+A3G2F)	EEQFNSTFR	0.00034218	0.000378998	0.000394807	0.0002804	0.000336414	0.000341729	0.000345755	0.114954	4.5699e-05	7.56592	1
1:Antistreptavidin IgG2 HC	289	N289+Deamidation	+Deamidation	1:E285-R293 = 1156.5149m(N289+Deamidation)	EEQFNSTFR	0.000580308	0.000578085	0.000745511	0.000660348	0.000675839	0.000677832	0.000652987	0.0984097	7.56242e-05	8.63463	1
1:Antistreptavidin IgG2 HC	289	N289+Gn	N-Glycan	1:E285-R293 = 1156.5149m(N289+Gn)	EEQFNSTFR	0.000302475	0.000341804	0.000381251	0.000358272	0.000379466	0.000326192	0.000348243	0.0888551	2.55577e-05	13.6258	1
1:Antistreptavidin IgG2 HC	289	N289+M5	N-Glycan	1:E285-R293 = 1156.5149m(N289+M5)	EEQFNSTFR	0.0454622	0.0469757	0.0444021	0.0379171	0.0448793	0.0480663	0.0446171	0.079671	0.00353127	12.6349	1
1:Antistreptavidin IgG2 HC	289	N289+M6	N-Glycan	1:E285-R293 = 1156.5149m(N289+M6)	EEQFNSTFR	0.0130382	0.01301	0.0133087	0.0112938	0.0130419	0.0141139	0.0129678	0.0710479	0.000979247	13.2426	1
1:Antistreptavidin IgG2 HC	289	N289+M7	N-Glycan	1:E285-R293 = 1156.5149m(N289+M7)	EEQFNSTFR	0.00588498	0.00606882	0.0058699	0.00490496	0.0057228	0.00645005	0.00581692	0.0880713	0.000899489	6.46692	1
1:Antistreptavidin IgG2 HC	289	N289+M8	N-Glycan	1:E285-R293 = 1156.5149m(N289+M8)	EEQFNSTFR	0.00609194	0.00649179	0.00633736	0.00557312	0.00640938	0.0067141	0.00626962	0.0633085	0.000310402	20.1984	1
1:Antistreptavidin IgG2 HC	289	N289+M9	N-Glycan	1:E285-R293 = 1156.5149m(N289+M9)	EEQFNSTFR	0.000375375	0.000561454	0.000578261	0.000492578	0.000567783	0.000585252	0.000526784	0.154327	7.71408e-05	6.82886	1
1:Antistreptavidin IgG2 HC	289	N289+Unglycosylated	N-Glycan	1:E285-R293 = 1156.5149m(N289+Unglycosylated)	EEQFNSTFR	0.0127807	0.0161164	0.0163705	0.0137768	0.0155708	0.014403	0.0148364	0.0956428	0.00146299	10.1411	1
1:Antistreptavidin IgG2 HC	294	V294(V294M)[GTG] (1 base change)	Sequence Variant (1 base change)	1:V294-K309 = 1792.9836m(V294M)	VVSVLTVVHQDWLNGK	5.80026e-05	7.04248e-05	5.95632e-05	5.76298e-05	6.07674e-05	5.75597e-05	6.06579e-05	0.0815749	7.06504e-06	8.58565	1
1:Antistreptavidin IgG2 HC	296	S296(S296N)[AGC] (1 base change)	Sequence Variant (1 base change)	1:V294-K309 = 1792.9836m(S296N)	VVSVLTVVHQDWLNGK	0.000169649	0.000211327	0.000174287	0.00016714	0.000160743	0.000160963	0.000174018	0.109187	1.92854e-05	9.02329	1
1:Antistreptavidin IgG2 HC	297	V297(V297A)[GTC] (1 base change)	Sequence Variant (1 base change)	1:V294-K309 = 1792.9836m(V297A)	VVSVLTVVHQDWLNGK	3.81884e-05	3.85414e-05	4.13385e-05	4.18867e-05	4.51632e-05	4.34271e-05	4.14242e-05	0.0656638	3.77757e-06	10.9658	1
1:Antistreptavidin IgG2 HC	297	V297(V297I)[GTC] (1 base change)	Sequence Variant (1 base change)	1:V294-K309 = 1792.9836m(V297I)	VVSVLTVVHQDWLNGK	0.000319009	0.000308226	0.000308614	0.000304997	0.000298174	0.000302639	0.000306943	0.0230017	2.62527e-05	11.6919	1
1:Antistreptavidin IgG2 HC	300	V300(V300I)[GTT] (1 base change)	Sequence Variant (1 base change)	1:V294-K309 = 1792.9836m(V300I)	VVSVLTVVHQDWLNGK	0.000149392	0.000148688	0.000153697	0.000144179	0.000144743	0.000151115	0.000148636	0.0246929	7.12019e-06	20.8752	1
1:Antistreptavidin IgG2 HC	302	H302+Double Oxidation	+Double Oxidation	1:V294-K309 = 1792.9836m(H302+Double Oxidation)	VVSVLTVVHQDWLNGK	5.65847e-05	4.41943e-05	4.66096e-05	4.60835e-05	4.40504e-05	4.3882e-05	4.69008e-05	0.104059	8.23253e-06	5.697	3
1:Antistreptavidin IgG2 HC	302	H302(H302Q)[CAC] (1 base change)	Sequence Variant (1 base change)	1:V294-K309 = 1792.9836m(H302Q)	VVSVLTVVHQDWLNGK	2.2082e-05	1.31389e-05	1.92014e-05	1.76463e-05	1.70035e-05	2.37685e-05	1.88068e-05	0.20209	3.62674e-06	5.18559	1
1:Antistreptavidin IgG2 HC	304	D304+H2O loss	+H2O loss	1:V294-K309 = 1792.9836m(D304+H2O loss)	VVSVLTVVHQDWLNGK	0.00127509	0.000850075	0.00115303	0.00121139	0.00114382	0.00103406	0.00111124	0.13579	0.000169928	6.53951	2
1:Antistreptavidin IgG2 HC	305	W305+Double Oxidation	+Double Oxidation	1:V294-K309 = 1792.9836m(W305+Double Oxidation)	VVSVLTVVHQDWLNGK	0.000402886	0.000481405	0.000520396	0.000338593	0.000391422	0.000532201	0.000444484	0.175942	0.000403269	1.1022	3
1:Antistreptavidin IgG2 HC	305	W305+Oxidation	+Oxidation	1:V294-K309 = 1792.9836m(W305+Oxidation)	VVSVLTVVHQDWLNGK	0.000207936	0.000201959	0.000211311	0.000203488	0.000217205	0.000260845	0.000217124	0.10186	2.15175e-05	10.0906	3
1:Antistreptavidin IgG2 HC	307	N307+Deamidation	+Deamidation	1:V294-K309 = 1792.9836m(N307+Deamidation)	VVSVLTVVHQDWLNGK	0.00415988	0.00488846	0.00434589	0.00419162	0.00434909	0.00405432	0.00433154	0.068218	0.000278938	15.5287	3
1:Antistreptavidin IgG2 HC	307	N307+NH3 loss	+NH3 loss	1:V294-K309 = 1792.9836m(N307+NH3 loss)	VVSVLTVVHQDWLNGK	0.0253328	0.0268818	0.025312	0.0248527	0.0243304	0.0237486	0.0250764	0.0427658	0.00155596	16.1163	2
1:Antistreptavidin IgG2 HC	309	K309+Glycation	+Glycation	1:V294-K312 = 2213.1845m(K309+Glycation)	VVSVLTVVHQDWLNGKEYK	0.000679526	0.000777447	0.000709706	0.000765091	0.000734247	0.000739734	0.000734292	0.0488917	6.58816e-05	11.1456	1
1:Antistreptavidin IgG2 HC	318	K318+Glycation	+Glycation	1:C313-K326 = 1540.8283m(K318+Glycation)	CKVSNKGLPAPIEK	1.89764e-05	2.26877e-06	1.20968e-05	1.45877e-05	4.10501e-06	3.74453e-06	9.29654e-06	0.740111	3.08756e-05	0.301097	1
1:Antistreptavidin IgG2 HC	319	G319(G319S)[GGC] (1 base change)	Sequence Variant (1 base change)	1:G319-K326 = 823.48035m(G319S)	GLPAPIEK	6.95004e-05	7.19682e-05	7.50857e-05	6.8839e-05	7.52568e-05	7.01703e-05	7.18034e-05	0.0391369	2.73244e-06	26.2781	1
1:Antistreptavidin IgG2 HC	321	P321+Hydroxylation	+Hydroxylation	1:G319-K326 = 823.4804m(P321+Hydroxylation)	GLPAPIEK	0.00220125	0.00229162	0.0021651	0.002086	0.00207585	0.00213988	0.00215995	0.0370457	0.000160168	13.4855	1
1:Antistreptavidin IgG2 HC	352	K352+Glycation	+Glycation	1:E348-K362 = 1779.8747m(K352+Glycation)	EEMTKNQVSLTCLVK	0.000438249	0.000394963	0.000469685	0.000482208	0.000467202	0.000488085	0.000456732	0.0762643	3.8755e-05	11.7851	1
1:Antistreptavidin IgG2 HC	353	~N353+NH3 loss	+NH3 loss	1:N353-K362 = 1161.6064m(~N353+NH3 loss)	NQVSLTCLVK	0.00117962	0.000991839	0.00105241	0.0010545	0.00103141	0.00102679	0.00105609	0.0611771	6.38732e-05	16.5342	2
1:Antistreptavidin IgG2 HC	353	N353(N353K)[AAC] (1 base change)	Sequence Variant (1 base change)	1:N353-K362 = 1161.6064m(N353K)	NQVSLTCLVK	2.52476e-05	2.43751e-05	2.36253e-05	2.05633e-05	2.37729e-05	2.15477e-05	2.31887e-05	0.0765728	5.08105e-06	4.56375	1
1:Antistreptavidin IgG2 HC	359	C359(C359Y)[TGC] (1 base change)	Sequence Variant (1 base change)	1:N353-K362 = 1161.6064m(C359Y)	NQVSLTCLVK	0.000157396	0.000145113	0.00014298	0.000148697	0.000148676	0.000140433	0.000147216	0.0403392	8.92228e-06	16.4998	1
1:Antistreptavidin IgG2 HC	362	K362+Hydroxylation	+Hydroxylation	1:N353-K362 = 1161.6064m(K362+Hydroxylation)	NQVSLTCLVK	5.67212e-05	5.7208e-05	6.30462e-05	5.7664e-05	6.27937e-05	5.53876e-05	5.88034e-05	0.055768	2.98209e-06	19.7189	1
1:Antistreptavidin IgG2 HC	362	K362+Glycation	+Glycation	1:N353-K384 = 3686.7199m(K362+Glycation)	NQVSLTCLVKGFYPSDIAVEWESNGQPENNYK	8.9033e-05	4.63383e-05	0.000104813	8.29759e-05	9.93369e-05	0.000109875	8.87287e-05	0.25939	2.39755e-05	3.70081	1
1:Antistreptavidin IgG2 HC	368	D368(D368N)[GAC] (1 base change)	Sequence Variant (1 base change)	1:G363-K384 = 2543.1241m(D368N)	GFYPSDIAVEWESNGQPENNYK	6.5957e-05	7.47594e-05	8.0956e-05	7.30918e-05	9.34074e-05	6.06427e-05	7.48024e-05	0.154252	1.50398e-05	4.97363	1
1:Antistreptavidin IgG2 HC	370	A370(A370T)[GCC] (1 base change)	Sequence Variant (1 base change)	1:G363-K384 = 2543.1241m(A370T)	GFYPSDIAVEWESNGQPENNYK	6.14155e-05	6.66815e-05	0.000101246	6.75452e-05	7.82841e-05	7.38726e-05	7.48408e-05	0.189912	1.0941e-05	6.84039	1
1:Antistreptavidin IgG2 HC	375	S375(S375N)[AGC] (1 base change)	Sequence Variant (1 base change)	1:G363-K384 = 2543.1241m(S375N)	GFYPSDIAVEWESNGQPENNYK	0.000143207	0.000121785	0.000158881	0.000192138	0.000178428	0.000150304	0.000157457	0.159945	3.42209e-05	4.6012	1
1:Antistreptavidin IgG2 HC	376	~N376+Deamidation	+Deamidation	1:G363-K384 = 2543.1241m(~N376+Deamidation)	GFYPSDIAVEWESNGQPENNYK	0.0105427	0.0109181	0.0136207	0.0131464	0.0130646	0.011802	0.0121824	0.105172	0.00265767	4.58386	3
1:Antistreptavidin IgG2 HC	376	~N376+NH3 loss	+NH3 loss	1:G363-K384 = 2543.1241m(~N376+NH3 loss)	GFYPSDIAVEWESNGQPENNYK	0.0160912	0.0168784	0.0182815	0.0177468	0.0162495	0.0154714	0.0167865	0.0634206	0.00302273	5.5534	2
1:Antistreptavidin IgG2 HC	382	~N382+NH3 loss	+NH3 loss	1:G363-K384 = 2543.1241m(~N382+NH3 loss)	GFYPSDIAVEWESNGQPENNYK	0.0040716	0.0042539	0.00453617	0.00401832	0.00413229	0.00402523	0.00417292	0.0474631	0.000647244	6.44721	2
1:Antistreptavidin IgG2 HC	384	K384+Glycation	+Glycation	1:G363-K401 = 4430.0001m(K384+Glycation)	GFYPSDIAVEWESNGQPENNYKTTPPMLDSDGSFFLYSK	0.00034644	0.000193255	0.000369265	0.000378245	0.000317484	0.000270573	0.000312544	0.224875	5.95294e-05	5.25024	1
1:Antistreptavidin IgG2 HC	389	M389(M389I)[ATG] (1 base change)	Sequence Variant (1 base change)	1:T385-K401 = 1904.8866m(M389I)	TTPPMLDSDGSFFLYSK	0.000143222	0.000106957	0.000136352	0.000154213	0.000144988	0.000129284	0.000135836	0.121111	1.63555e-05	8.3052	1
1:Antistreptavidin IgG2 HC	393	D393+H2O loss	+H2O loss	1:T385-K401 = 1904.8866m(D393+H2O loss)	TTPPMLDSDGSFFLYSK	0.00537794	0.00439009	0.00566903	0.00583673	0.00567644	0.00550479	0.00540917	0.0967854	0.000491582	11.0036	2
1:Antistreptavidin IgG2 HC	400	S400(S400N)[AGC] (1 base change)	Sequence Variant (1 base change)	1:T385-K401 = 1904.8866m(S400N)	TTPPMLDSDGSFFLYSK	0.000189732	0.000159048	0.000190981	0.00021018	0.000185791	0.000200089	0.000189304	0.0909725	2.06785e-05	9.15459	1
1:Antistreptavidin IgG2 HC	420	M420+Oxidation	+Oxidation	1:W409-K431 = 2801.2439m(M420+Oxidation)	WQQGNVFSCSVMHEALHNHYTQK	0.00742847	0.00856736	0.00825136	0.00816949	0.00833597	0.00812616	0.00814647	0.0472407	0.000749039	10.8759	3
1:Antistreptavidin IgG2 HC	420	M420(M420I)[ATG] (1 base change)	Sequence Variant (1 base change)	1:W409-K431 = 2801.2439m(M420I)	WQQGNVFSCSVMHEALHNHYTQK	0.000318493	0.000341258	0.000356568	0.000355905	0.000363041	0.000339164	0.000345738	0.0470954	4.42529e-05	7.81277	1
1:Antistreptavidin IgG2 HC	426	N426+Deamidation	+Deamidation	1:W409-K431 = 2801.2439m(N426+Deamidation)	WQQGNVFSCSVMHEALHNHYTQK	0.00276075	0.00297092	0.00298207	0.00319676	0.00320243	0.00305063	0.00302726	0.0545207	0.000370102	8.17953	3
1:Antistreptavidin IgG2 HC	426	N426+NH3 loss	+NH3 loss	1:W409-K431 = 2801.2439m(N426+NH3 loss)	WQQGNVFSCSVMHEALHNHYTQK	0.00471298	0.0052014	0.00544332	0.00535232	0.00547045	0.00527464	0.00524252	0.0530995	0.000465086	11.2722	2
1:Antistreptavidin IgG2 HC	436	S436(S436N)[TCT] (2 base change)	Sequence Variant (2 base change)	1:S432-G438 = 659.34901m(S436N)	SLSLSPG	0.000551264	0.000549318	0.000570881	0.000566814	0.000607974	0.00053397	0.00056337	0.045367	3.47465e-05	16.2137	1
1:Antistreptavidin IgG2 HC	438	G438-58.0054	Unknown Modification	1:S432-G438 = 659.34901m(G438-58.0054)	SLSLSPG	0.00136899	0.00092477	0.00128422	0.00133611	0.00131205	0.0013775	0.00126727	0.135226	0.000135455	9.35568	1
1:Antistreptavidin IgG2 HC	438	G438+Lys	+Lys	1:S432-G438 = 659.34901m(G438+Lys)	SLSLSPG	0.0305935	0.0245718	0.0265037	0.0262862	0.0255941	0.0276405	0.026865	0.0778002	0.00182367	14.7312	1
2:Antistreptavidin IgG2 LC	1	Q1+17.0265	N-Terminal Extension	2:Q1-R17 = 1676.8482m(Q1+17.0265)	QSVVTQPPSVSGAPGQR	0.091903	0.0885777	0.0961687	0.0969188	0.0915377	0.0827708	0.0913128	0.0570844	0.000912305	100.09	2
2:Antistreptavidin IgG2 LC	2	S2+N-term clip	N-term Clip	2:S2-R17 = 1565.8162m[nonspecific]	SVVTQPPSVSGAPGQR	0.00097704	0.000814504	0.000977786	0.00103622	0.00100889	0.00100106	0.00096925	0.0814319	6.05751e-05	16.0008	3
2:Antistreptavidin IgG2 LC	5	~T5+GalNAc	O-Glycan	2:Q1-R17 = 1676.8482m(~T5+GalNAc)	QSVVTQPPSVSGAPGQR	0.000181076	0.00022518	0.000161014	0.000226692	0.00021318	0.000165736	0.00019548	0.152608	2.35631e-05	8.296	1
2:Antistreptavidin IgG2 LC	14	P14+Hydroxylation	+Hydroxylation	2:Q1-R17 = 1676.8482m(P14+Hydroxylation)	QSVVTQPPSVSGAPGQR	0.00243254	0.00232936	0.00229882	0.00240952	0.00244765	0.00232963	0.00237459	0.0264501	0.000203845	11.649	1
2:Antistreptavidin IgG2 LC	17	R17(R17K)[AGG] (1 base change)	Sequence Variant (1 base change)	2:Q1-R17 = 1676.8482m(R17K)	QSVVTQPPSVSGAPGQR	0.000210591	0.000194721	0.000183337	0.000220436	0.000225348	0.000206442	0.000206812	0.0761734	1.61698e-05	12.79	1
2:Antistreptavidin IgG2 LC	24	G24(G24R)[GGG] (1 base change)	Sequence Variant (1 base change)	2:V18-G24 = 737.3266m(G24R)	VTISCTG	8.40001e-05	0.000113938	0.000115692	0.000118525	0.000105829	0.000105905	0.000107315	0.116943	2.06319e-05	5.20139	1
2:Antistreptavidin IgG2 LC	28	N28(N28K)[AAC] (1 base change)	Sequence Variant (1 base change)	2:V18-N28 = 1112.4656m(N28K)	VTISCTGSSSN	4.57257e-05	7.90735e-05	6.68606e-05	6.87192e-05	7.39671e-05	7.55463e-05	6.83154e-05	0.174743	1.40962e-05	4.84638	1
2:Antistreptavidin IgG2 LC	30	G30(G30R)[GGG] (1 base change)	Sequence Variant (1 base change)	2:V18-G30 = 1282.5711m(G30R)	VTISCTGSSSNIG	7.19012e-05	0.000103186	0.000106465	9.69304e-05	0.000109424	0.000100284	9.80318e-05	0.138111	1.812e-05	5.41013	1
2:Antistreptavidin IgG2 LC	32	G32+N-term clip	N-term Clip	2:G32-K47 = 1858.9002m[nonspecific]	GYDVHWYQQLPGTAPK	0.000172097	0.000181172	0.000183022	0.000200349	0.000170594	0.00016971	0.000179491	0.0649648	3.73087e-05	4.81095	3
2:Antistreptavidin IgG2 LC	36	H36(H36Q)[CAC] (1 base change)	Sequence Variant (1 base change)	2:V18-K47 = 3194.4979m(H36Q)	VTISCTGSSSNIGAGYDVHWYQQLPGTAPK	7.81618e-05	8.83687e-05	0.000108206	0.000107869	0.000103875	7.81568e-05	9.41062e-05	0.152158	1.40939e-05	6.67708	1
2:Antistreptavidin IgG2 LC	37	W37+Double Oxidation	+Double Oxidation	2:V18-K47 = 3194.4979m(W37+Double Oxidation)	VTISCTGSSSNIGAGYDVHWYQQLPGTAPK	0.000612111	0.000308492	0.000510604	0.000441603	0.000493656	0.000591962	0.000493071	0.223967	0.00058558	0.842022	3
2:Antistreptavidin IgG2 LC	37	W37+Oxidation	+Oxidation	2:V18-K47 = 3194.4979m(W37+Oxidation)	VTISCTGSSSNIGAGYDVHWYQQLPGTAPK	0.000496285	0.0004732	0.000629641	0.000605786	0.000434058	0.000593828	0.0005388	0.150435	0.000104549	5.15357	3
2:Antistreptavidin IgG2 LC	48	L48(L48F)[CTC] (1 base change)	Sequence Variant (1 base change)	2:L48-R63 = 1756.9220m(L48F)	LLIYGNSNRPSGVPDR	0.000120627	0.000122631	0.00013268	0.000130531	0.000126777	0.000123009	0.000126043	0.0380345	1.1439e-05	11.0186	1
2:Antistreptavidin IgG2 LC	52	G52(G52D)[GGT] (1 base change)	Sequence Variant (1 base change)	2:L48-R63 = 1756.9220m(G52D)	LLIYGNSNRPSGVPDR	4.87352e-05	3.55382e-05	6.29105e-05	5.41122e-05	3.95429e-05	5.61477e-05	4.94978e-05	0.209948	1.08388e-05	4.56673	1
2:Antistreptavidin IgG2 LC	53	N53(N53K)[AAC] (1 base change)	Sequence Variant (1 base change)	2:L48-N53 = 691.39048m(N53K)	LLIYGN	3.63712e-05	2.90823e-05	3.63532e-05	3.36309e-05	3.51978e-05	3.56106e-05	3.43743e-05	0.0809017	4.0151e-06	8.56126	1
2:Antistreptavidin IgG2 LC	53	N53+Deamidation	+Deamidation	2:L48-R63 = 1756.9220m(N53+Deamidation)	LLIYGNSNRPSGVPDR	0.00475016	0.00477909	0.00491273	0.00488731	0.00513276	0.00497934	0.0049069	0.0284702	0.000574106	8.54702	3
2:Antistreptavidin IgG2 LC	54	~S54+GalNAc-3SG	O-Glycan	2:L48-R63 = 1756.9220m(~S54+GalNAc-3SG)	LLIYGNSNRPSGVPDR	0.00020782	0.000193167	0.000235789	0.000233268	0.000230971	0.000214731	0.000219291	0.0773562	2.72381e-05	8.0509	1
2:Antistreptavidin IgG2 LC	59	G59(G59E)[GGG] (1 base change)	Sequence Variant (1 base change)	2:L48-R63 = 1756.9220m(G59E)	LLIYGNSNRPSGVPDR	4.71945e-05	4.77641e-05	4.4648e-05	4.90382e-05	4.89568e-05	4.37058e-05	4.68846e-05	0.0476059	4.03242e-06	11.6269	1
2:Antistreptavidin IgG2 LC	83	E83(E83K)[GAG] (1 base change)	Sequence Variant (1 base change)	2:S69-E83 = 1404.7096m(E83K)	SGTSASLAITGLQAE	0.000306815	0.000461884	0.000403967	0.000375089	0.00044838	0.000446718	0.000407142	0.144752	0.000119896	3.39579	1
2:Antistreptavidin IgG2 LC	98	S98+N-term clip	N-term Clip	2:S98-K108 = 1128.5815m[nonspecific]	SGLYVFGTGTK	0.00291172	0.00718102	0.00327904	0.00500052	0.00516421	0.00332444	0.00447683	0.363921	0.00217569	2.05766	3
2:Antistreptavidin IgG2 LC	100	L100+N-term clip	N-term Clip	2:L100-K108 = 984.5280m[nonspecific]	LYVFGTGTK	9.53115e-05	0.000139503	9.74165e-05	0.000118866	0.000101638	9.02783e-05	0.000107169	0.173764	7.1199e-05	1.5052	3
2:Antistreptavidin IgG2 LC	108	K108+Glycation	+Glycation	2:S69-K116 = 5035.3808m(K108+Glycation)	SGTSASLAITGLQAEDEADYYCQSYDSSLSGLYVFGTGTKVTVLGQPK	0.00173807	0.00148395	0.00206079	0.00195293	0.00202456	0.00204253	0.0018838	0.121568	0.000278741	6.75827	1
2:Antistreptavidin IgG2 LC	109	V109(V109I)[GTC] (1 base change)	Sequence Variant (1 base change)	2:V109-K116 = 840.5069m(V109I)	VTVLGQPK	9.52264e-05	0.000118912	0.000112574	0.000112324	0.000107555	0.000108604	0.000109199	0.0725461	6.71549e-06	16.2608	1
2:Antistreptavidin IgG2 LC	111	V111(V111A)[GTC] (1 base change)	Sequence Variant (1 base change)	2:V109-K116 = 840.5069m(V111A)	VTVLGQPK	2.7508e-05	2.98734e-05	2.99934e-05	3.03806e-05	3.21984e-05	3.32945e-05	3.05414e-05	0.0659728	1.6812e-06	18.1665	1
2:Antistreptavidin IgG2 LC	111	V111(V111I)[GTC] (1 base change)	Sequence Variant (1 base change)	2:V109-K116 = 840.5069m(V111I)	VTVLGQPK	0.000218927	0.000243231	0.000230869	0.000230588	0.00024004	0.000225575	0.000231538	0.0388683	1.31544e-05	17.6015	1
2:Antistreptavidin IgG2 LC	114	Q114+Deamidation	+Deamidation	2:V109-K116 = 840.5069m(Q114+Deamidation)	VTVLGQPK	6.73102e-05	6.6124e-05	6.48692e-05	6.27383e-05	6.06671e-05	6.30731e-05	6.41303e-05	0.0379923	3.0424e-06	21.0789	3
2:Antistreptavidin IgG2 LC	144	D144+H2O loss	+H2O loss	2:A136-K155 = 2211.1286m(D144+H2O loss)	ATLVCLISDFYPGAVTVAWK	7.25711e-05	5.56095e-05	7.28177e-05	7.41778e-05	7.77718e-05	8.29113e-05	7.26432e-05	0.126807	9.47555e-06	7.66638	2
2:Antistreptavidin IgG2 LC	144	D144(D144G)[GAC] (1 base change)	Sequence Variant (1 base change)	2:A136-K155 = 2211.1286m(D144G)	ATLVCLISDFYPGAVTVAWK	0.00337131	0.00265108	0.00342278	0.00303538	0.00300069	0.00227339	0.00295911	0.147888	0.000627491	4.71577	1
2:Antistreptavidin IgG2 LC	154	W154+Double Oxidation	+Double Oxidation	2:A136-K155 = 2211.1286m(W154+Double Oxidation)	ATLVCLISDFYPGAVTVAWK	0.00157026	0.00254885	0.00319075	0.00166732	0.00232807	0.00251694	0.0023037	0.263038	0.00253574	0.90849	3
2:Antistreptavidin IgG2 LC	154	W154+Oxidation	+Oxidation	2:A136-K155 = 2211.1286m(W154+Oxidation)	ATLVCLISDFYPGAVTVAWK	0.000516506	0.000509176	0.000574339	0.00050799	0.000547595	0.000817443	0.000578842	0.206858	8.84168e-05	6.54674	3
2:Antistreptavidin IgG2 LC	154	W154+Oxidation to kynurenine	+Oxidation to kynurenine	2:A136-K155 = 2211.1286m(W154+Oxidation to kynurenine)	ATLVCLISDFYPGAVTVAWK	0.000128871	0.000286586	0.000362342	0.000151877	0.000292653	0.000298621	0.000253492	0.363144	0.000124514	2.03585	3
2:Antistreptavidin IgG2 LC	155	K155+Glycation	+Glycation	2:A136-K162 = 2895.4728m(K155+Glycation)	ATLVCLISDFYPGAVTVAWKADSSPVK	0.011803	0.00961056	0.0122625	0.0119113	0.0113787	0.0115932	0.0114265	0.0821285	0.000793629	14.3978	1
2:Antistreptavidin IgG2 LC	162	K162+Glycation	+Glycation	2:A156-K172 = 1673.8472m(K162+Glycation)	ADSSPVKAGVETTTPSK	0.000913537	0.000862749	0.000805781	0.000970157	0.0010302	0.000851852	0.000905713	0.09164	0.000101109	8.95776	1
2:Antistreptavidin IgG2 LC	164	G164(G164E)[GGA] (1 base change)	Sequence Variant (1 base change)	2:A163-K172 = 989.5029m(G164E)	AGVETTTPSK	0.00010965	0.000106097	0.000107303	0.000106931	0.000104378	0.000108059	0.00010707	0.016656	8.15126e-06	13.1353	1
2:Antistreptavidin IgG2 LC	165	V165(V165M)[GTG] (1 base change)	Sequence Variant (1 base change)	2:A163-K172 = 989.5029m(V165M)	AGVETTTPSK	6.89715e-05	6.41784e-05	7.3455e-05	5.43644e-05	6.94623e-05	5.05733e-05	6.35008e-05	0.143574	6.97047e-06	9.10998	1
2:Antistreptavidin IgG2 LC	177	K177+Glycation	+Glycation	2:Q173-K192 = 2314.1230m(K177+Glycation)	QSNNKYAASSYLSLTPEQWK	0.00072732	0.000948448	0.000954947	0.000989726	0.00100445	0.00104719	0.000945347	0.119183	9.55834e-05	9.89029	1
2:Antistreptavidin IgG2 LC	185	S185(S185R)[AGC] (1 base change)	Sequence Variant (1 base change)	2:Y178-S185 = 860.3916m(S185R)	YAASSYLS	0.000188475	0.000267226	0.000245938	0.000273371	0.000271818	0.000287951	0.000255796	0.139422	2.61257e-05	9.79097	1
2:Antistreptavidin IgG2 LC	185	S185(S185N)[AGC] (1 base change)	Sequence Variant (1 base change)	2:Y178-K192 = 1742.8516m(S185N)	YAASSYLSLTPEQWK	0.000580002	0.000517875	0.000560893	0.000569063	0.000559757	0.000572155	0.000559958	0.0391694	3.15257e-05	17.7619	1
2:Antistreptavidin IgG2 LC	191	W191+Double Oxidation	+Double Oxidation	2:Y178-K192 = 1742.8516m(W191+Double Oxidation)	YAASSYLSLTPEQWK	0.000204544	8.43997e-05	0.000171096	0.000182608	0.000193517	0.000292502	0.000188111	0.354802	0.000178012	1.05673	3
2:Antistreptavidin IgG2 LC	191	W191+Oxidation	+Oxidation	2:Y178-K192 = 1742.8516m(W191+Oxidation)	YAASSYLSLTPEQWK	0.000291402	0.000289984	0.000327549	0.000334202	0.00031848	0.00053454	0.000349359	0.264938	6.34957e-05	5.50209	3
2:Antistreptavidin IgG2 LC	192	K192+Glycation	+Glycation	2:Y178-R195 = 2123.0436m(K192+Glycation)	YAASSYLSLTPEQWKSHR	0.000959543	0.00120921	0.00116756	0.00122401	0.00128245	0.00137278	0.00120259	0.115307	0.000192525	6.24641	1
2:Antistreptavidin IgG2 LC	196	S196(S196N)[AGC] (1 base change)	Sequence Variant (1 base change)	2:S196-K210 = 1711.7359m(S196N)	SYSCQVTHEGSTVEK	4.87865e-05	3.22023e-05	5.50169e-05	5.1892e-05	5.26814e-05	6.04804e-05	5.01766e-05	0.19195	1.36765e-05	3.66882	1
2:Antistreptavidin IgG2 LC	198	S198(S198N)[AGC] (1 base change)	Sequence Variant (1 base change)	2:S196-K210 = 1711.7359m(S198N)	SYSCQVTHEGSTVEK	0.000382731	0.000431015	0.00048648	0.000455004	0.000492117	0.000444046	0.000448566	0.0893865	4.62163e-05	9.70579	1
2:Antistreptavidin IgG2 LC	201	V201(V201I)[GTC] (1 base change)	Sequence Variant (1 base change)	2:S196-K210 = 1711.7359m(V201I)	SYSCQVTHEGSTVEK	6.79438e-05	8.84094e-05	9.35455e-05	9.7056e-05	9.06397e-05	8.24859e-05	8.66801e-05	0.120126	1.10216e-05	7.86454	1
2:Antistreptavidin IgG2 LC	201	V201(V201M)[GTC] (2 base change)	Sequence Variant (2 base change)	2:S196-K210 = 1711.7359m(V201M)	SYSCQVTHEGSTVEK	5.57804e-05	6.16056e-05	6.18462e-05	5.46955e-05	5.99027e-05	6.60625e-05	5.99821e-05	0.0702153	9.42236e-06	6.36594	1
2:Antistreptavidin IgG2 LC	203	H203(H203Q)[CAT] (1 base change)	Sequence Variant (1 base change)	2:S196-K210 = 1711.7359m(H203Q)	SYSCQVTHEGSTVEK	1.91802e-05	2.30853e-05	2.75251e-05	2.48004e-05	2.42555e-05	2.35829e-05	2.37382e-05	0.114537	3.98508e-06	5.95678	1
2:Antistreptavidin IgG2 LC	205	G205(G205D)[GGG] (2 base change)	Sequence Variant (2 base change)	2:S196-K210 = 1711.7359m(G205D)	SYSCQVTHEGSTVEK	6.52903e-05	7.52897e-05	8.66048e-05	8.38887e-05	8.64247e-05	7.11442e-05	7.81071e-05	0.113868	1.40267e-05	5.56844	1
2:Antistreptavidin IgG2 LC	206	S206(S206N)[AGC] (1 base change)	Sequence Variant (1 base change)	2:S196-K210 = 1711.7359m(S206N)	SYSCQVTHEGSTVEK	0.000142506	0.000160127	0.000178118	0.000174429	0.000173349	0.000171395	0.000166654	0.0798264	1.82385e-05	9.13747	1
2:Antistreptavidin IgG2 LC	210	K210+Glycation	+Glycation	2:S196-S218 = 2558.0789m(K210+Glycation)	SYSCQVTHEGSTVEKTVAPTECS	0.000239257	0.000270725	0.00030633	0.000290715	0.000321409	0.000288992	0.000286238	0.100239	5.92729e-05	4.82916	1
Reference variant abundance
Protein	Residue #	Modification	Category	Modified Peptides	Peptide Sequence	Abundance						Average
1:Antistreptavidin IgG2 HC	1	Q1+17.0265	N-Terminal Extension	1:Q1-R39 = 4113.0266m(Q1+17.0265)	QLQLQESGPGLVKPSGTLSLTCAVSGGSISSGNWWSWVR	0.981253	0.988171	0.979729	0.980047	0.982873	0.98175	0.982304
1:Antistreptavidin IgG2 HC	13	K13+Glycation	+Glycation	1:Q1-R39 = 4113.0266m(K13+Glycation)	QLQLQESGPGLVKPSGTLSLTCAVSGGSISSGNWWSWVR	0.999873	0.999907	0.999826	0.999858	0.999798	0.999804	0.999844
1:Antistreptavidin IgG2 HC	30	S30+C-term clip	C-term Clip	1:Q1-S30 = 2954.4907m[nonspecific]	QLQLQESGPGLVKPSGTLSLTCAVSGGSIS	0.999566	0.999828	0.999612	0.999596	0.999713	0.99968	0.999666
1:Antistreptavidin IgG2 HC	31	S31+N-term clip	N-term Clip	1:S31-R39 = 1176.5465m[nonspecific]	SGNWWSWVR	0.998602	0.998737	0.998575	0.998632	0.998865	0.998844	0.998709
1:Antistreptavidin IgG2 HC	34	~W34+Double Oxidation	+Double Oxidation	1:Q1-R39 = 4113.0266m(~W34+Double Oxidation)	QLQLQESGPGLVKPSGTLSLTCAVSGGSISSGNWWSWVR	0.998545	0.998297	0.997761	0.997886	0.998053	0.997521	0.99801
1:Antistreptavidin IgG2 HC	34	~W34+Oxidation to kynurenine	+Oxidation to kynurenine	1:Q1-R39 = 4113.0266m(~W34+Oxidation to kynurenine)	QLQLQESGPGLVKPSGTLSLTCAVSGGSISSGNWWSWVR	0.998545	0.998297	0.997761	0.997886	0.998053	0.997521	0.99801
1:Antistreptavidin IgG2 HC	37	~W37+Double Oxidation	+Double Oxidation	1:Q1-R39 = 4113.0266m(~W37+Double Oxidation)	QLQLQESGPGLVKPSGTLSLTCAVSGGSISSGNWWSWVR	0.99929	0.999165	0.999099	0.999368	0.999173	0.999096	0.999198
1:Antistreptavidin IgG2 HC	44	K44+Glycation	+Glycation	1:Q40-K65 = 2809.4035m(K44+Glycation)	QPPGKGLEWIGEISHSGTTNYNPSLK	0.999668	0.999679	0.999586	0.999599	0.99962	0.999565	0.999619
1:Antistreptavidin IgG2 HC	48	W48+Double Oxidation	+Double Oxidation	1:G45-K65 = 2302.1230m(W48+Double Oxidation)	GLEWIGEISHSGTTNYNPSLK	0.999644	0.999696	0.999644	0.999655	0.999631	0.999525	0.999632
1:Antistreptavidin IgG2 HC	48	W48+Oxidation	+Oxidation	1:G45-K65 = 2302.1230m(W48+Oxidation)	GLEWIGEISHSGTTNYNPSLK	0.999644	0.999696	0.999644	0.999655	0.999631	0.999525	0.999632
1:Antistreptavidin IgG2 HC	55	S55+C-term clip	C-term Clip	1:G45-S55 = 1226.5932m[nonspecific]	GLEWIGEISHS	0.999951	0.999963	0.999952	0.999911	0.999955	0.999962	0.999949
1:Antistreptavidin IgG2 HC	56	G56(G56R)[GGG] (1 base change)	Sequence Variant (1 base change)	1:G45-G56 = 1283.6146m(G56R)	GLEWIGEISHSG	0.999969	0.999958	0.999959	0.999957	0.999958	0.999954	0.999959
1:Antistreptavidin IgG2 HC	56	G56+N-term clip	N-term Clip	1:G56-K65 = 1093.5404m[nonspecific]	GTTNYNPSLK	0.999926	0.999913	0.999921	0.999909	0.999922	0.999919	0.999918
1:Antistreptavidin IgG2 HC	59	N59(N59K)[AAC] (1 base change)	Sequence Variant (1 base change)	1:G45-N59 = 1599.7529m(N59K)	GLEWIGEISHSGTTN	0.999931	0.999914	0.999926	0.999924	0.999926	0.999918	0.999923
1:Antistreptavidin IgG2 HC	65	K65+Glycation	+Glycation	1:G45-R67 = 2545.2561m(K65+Glycation)	GLEWIGEISHSGTTNYNPSLKSR	0.999691	0.999617	0.999639	0.999631	0.999626	0.999585	0.999631
1:Antistreptavidin IgG2 HC	67	R67(R67Q)[CGA] (1 base change)	Sequence Variant (1 base change)	1:S66-K74 = 961.5193m(R67Q)	SRVTISGDK	0.999927	0.999912	0.999922	0.999916	0.999912	0.999931	0.99992
1:Antistreptavidin IgG2 HC	68	V68(V68I)[GTC] (1 base change)	Sequence Variant (1 base change)	1:V68-K74 = 718.38612m(V68I)	VTISGDK	0.999907	0.999913	0.999915	0.999911	0.999896	0.999909	0.999908
1:Antistreptavidin IgG2 HC	107	~T107+GalNAc-3SG	O-Glycan	1:N99-K117 = 2059.9851m(~T107+GalNAc-3SG)	NFDYWGQGTLVTVSSASTK	0.99978	0.999712	0.999728	0.999688	0.99973	0.999659	0.999716
1:Antistreptavidin IgG2 HC	107	T107+N-term clip	N-term Clip	1:T107-K117 = 1092.6027m[nonspecific]	TLVTVSSASTK	0.999964	0.999953	0.99997	0.999949	0.99997	0.999989	0.999966
1:Antistreptavidin IgG2 HC	117	K117+Hydroxylation	+Hydroxylation	1:N99-K117 = 2059.9851m(K117+Hydroxylation)	NFDYWGQGTLVTVSSASTK	0.956417	0.949689	0.953309	0.954975	0.954986	0.952268	0.953607
1:Antistreptavidin IgG2 HC	120	~S120+GalNAc-3SG	O-Glycan	1:G118-R129 = 1287.6282m(~S120+GalNAc-3SG)	GPSVFPLAPCSR	0.999896	0.999928	0.999905	0.999896	0.99991	0.999908	0.999907
1:Antistreptavidin IgG2 HC	121	V121(V121I)[GTC] (1 base change)	Sequence Variant (1 base change)	1:G118-R129 = 1287.6282m(V121I)	GPSVFPLAPCSR	0.999916	0.999898	0.999909	0.999913	0.999918	0.999914	0.999911
1:Antistreptavidin IgG2 HC	122	F122(F122Y)[TTC] (1 base change)	Sequence Variant (1 base change)	1:G118-R129 = 1287.6282m(F122Y)	GPSVFPLAPCSR	0.999932	0.999918	0.999924	0.99992	0.999917	0.999906	0.99992
1:Antistreptavidin IgG2 HC	127	C127+C-term clip	C-term Clip	1:G118-C127 = 1044.4950m[nonspecific]	GPSVFPLAPC	0.999916	0.999504	0.999913	0.999663	0.999707	0.999918	0.99977
1:Antistreptavidin IgG2 HC	127	C127(C127Y)[TGC] (1 base change)	Sequence Variant (1 base change)	1:G118-R129 = 1287.6282m(C127Y)	GPSVFPLAPCSR	0.999967	0.999969	0.999968	0.999965	0.999971	0.999971	0.999968
1:Antistreptavidin IgG2 HC	129	R129(R129K)[AGG] (1 base change)	Sequence Variant (1 base change)	1:G118-R129 = 1287.6282m(R129K)	GPSVFPLAPCSR	0.999935	0.999926	0.99993	0.999937	0.999934	0.99993	0.999932
1:Antistreptavidin IgG2 HC	131	T131+N-term clip	N-term Clip	1:T131-K143 = 1336.6544m[nonspecific]	TSESTAALGCLVK	0.999914	0.999906	0.99991	0.999897	0.99989	0.999925	0.999907
1:Antistreptavidin IgG2 HC	132	S132+N-term clip	N-term Clip	1:S132-K143 = 1235.6068m[nonspecific]	SESTAALGCLVK	0.999637	0.999577	0.999628	0.999612	0.999616	0.999667	0.999623
1:Antistreptavidin IgG2 HC	134	S134(S134N)[AGC] (1 base change)	Sequence Variant (1 base change)	1:S130-K143 = 1423.6865m(S134N)	STSESTAALGCLVK	0.999721	0.999746	0.99976	0.999748	0.999729	0.999766	0.999745
1:Antistreptavidin IgG2 HC	134	S134+N-term clip	N-term Clip	1:S134-K143 = 1019.5321m[nonspecific]	STAALGCLVK	0.999538	0.999531	0.999591	0.999581	0.999582	0.999589	0.999569
1:Antistreptavidin IgG2 HC	135	T135+N-term clip	N-term Clip	1:T135-K143 = 932.5001m[nonspecific]	TAALGCLVK	0.999847	0.999887	0.999894	0.999865	0.999898	0.9999	0.999882
1:Antistreptavidin IgG2 HC	136	A136(A136T)[GCG] (1 base change)	Sequence Variant (1 base change)	1:S130-K143 = 1423.6865m(A136T)	STSESTAALGCLVK	0.999968	0.999969	0.999968	0.99997	0.999966	0.999964	0.999968
1:Antistreptavidin IgG2 HC	140	C140(C140Y)[TGC] (1 base change)	Sequence Variant (1 base change)	1:S130-K143 = 1423.6865m(C140Y)	STSESTAALGCLVK	0.999779	0.999787	0.999792	0.999789	0.999792	0.999804	0.999791
1:Antistreptavidin IgG2 HC	142	V142(V142I)[GTC] (1 base change)	Sequence Variant (1 base change)	1:S130-K143 = 1423.6865m(V142I)	STSESTAALGCLVK	0.999951	0.999944	0.999951	0.999954	0.999949	0.999955	0.999951
1:Antistreptavidin IgG2 HC	154	~W154+Double Oxidation	+Double Oxidation	1:D144-K206 = 6763.2341m(~W154+Double Oxidation)	DYFPEPVTVSWNSGALTSGVHTFPAVLQSSGLYSLSSVVTVPSSNFGTQTYTCNVDHKPSNTK	0.984302	0.987692	0.989101	0.984473	0.984081	0.985177	0.985804
1:Antistreptavidin IgG2 HC	154	W154+Oxidation	+Oxidation	1:D144-K206 = 6763.2341m(W154+Oxidation)	DYFPEPVTVSWNSGALTSGVHTFPAVLQSSGLYSLSSVVTVPSSNFGTQTYTCNVDHKPSNTK	0.984302	0.987692	0.989101	0.984473	0.984081	0.985177	0.985804
1:Antistreptavidin IgG2 HC	155	N155(N155K)[AAC] (1 base change)	Sequence Variant (1 base change)	1:D144-N155 = 1452.6561m(N155K)	DYFPEPVTVSWN	0.999904	0.99989	0.999887	0.999906	0.999875	0.999899	0.999894
1:Antistreptavidin IgG2 HC	158	A158+N-term clip	N-term Clip	1:A158-K206 = 5184.5350m[nonspecific]	ALTSGVHTFPAVLQSSGLYSLSSVVTVPSSNFGTQTYTCNVDHKPSNTK	0.999908	0.999977	0.999953	0.999973	0.999947	0.999981	0.999956
1:Antistreptavidin IgG2 HC	160	T160+C-term clip	C-term Clip	1:D144-T160 = 1881.8785m[nonspecific]	DYFPEPVTVSWNSGALT	0.999978	0.999992	0.999985	0.999951	0.999979	0.999987	0.999979
1:Antistreptavidin IgG2 HC	161	S161+N-term clip	N-term Clip	1:S161-K206 = 4899.3661m[nonspecific]	SGVHTFPAVLQSSGLYSLSSVVTVPSSNFGTQTYTCNVDHKPSNTK	0.999795	0.999876	0.999824	0.999759	0.999805	0.999918	0.999829
1:Antistreptavidin IgG2 HC	191	T191+N-term clip	N-term Clip	1:T191-K206 = 1893.8527m[nonspecific]	TQTYTCNVDHKPSNTK	0.999828	0.999759	0.999746	0.999761	0.999735	0.99977	0.999767
1:Antistreptavidin IgG2 HC	199	D199+H2O loss	+H2O loss	1:D144-K206 = 6763.2341m(D199+H2O loss)	DYFPEPVTVSWNSGALTSGVHTFPAVLQSSGLYSLSSVVTVPSSNFGTQTYTCNVDHKPSNTK	0.994317	0.995906	0.995393	0.99429	0.993854	0.994462	0.994704
1:Antistreptavidin IgG2 HC	238	K238+Glycation	+Glycation	1:C215-K240 = 2911.3305m(K238+Glycation)	CCVECPPCPAPPVAGPSVFLFPPKPK	0.999129	0.999248	0.999038	0.998948	0.999033	0.999017	0.999069
1:Antistreptavidin IgG2 HC	240	K240+Glycation	+Glycation	1:P239-R247 = 1059.5747m(K240+Glycation)	PKDTLMISR	0.998946	0.998636	0.998774	0.998897	0.998638	0.998532	0.998737
1:Antistreptavidin IgG2 HC	241	D241+H2O loss	Artifact-Detection	1:D241-R247 = 834.42694m(D241+H2O loss)	DTLMISR	0.995946	0.995535	0.994948	0.995543	0.995513	0.99544	0.995488
1:Antistreptavidin IgG2 HC	244	M244+Double Oxidation	+Double Oxidation	1:D241-R247 = 834.4269m(M244+Double Oxidation)	DTLMISR	0.981704	0.979461	0.980298	0.980831	0.980645	0.981092	0.980672
1:Antistreptavidin IgG2 HC	244	M244+Oxidation	+Oxidation	1:D241-R247 = 834.4269m(M244+Oxidation)	DTLMISR	0.981704	0.979461	0.980298	0.980831	0.980645	0.981092	0.980672
1:Antistreptavidin IgG2 HC	244	M244(M244I)[ATG] (1 base change)	Sequence Variant (1 base change)	1:D241-R247 = 834.4269m(M244I)	DTLMISR	0.981704	0.979461	0.980298	0.980831	0.980645	0.981092	0.980672
1:Antistreptavidin IgG2 HC	259	S259(S259R)[AGC] (1 base change)	Sequence Variant (1 base change)	1:T248-S259 = 1304.6170m(S259R)	TPEVTCVVVDVS	0.999851	0.999765	0.999799	0.999854	0.999857	0.999834	0.999827
1:Antistreptavidin IgG2 HC	262	D262+C-term clip	C-term Clip	1:T248-D262 = 1685.7454m[nonspecific]	TPEVTCVVVDVSHED	0.997764	0.995608	0.995653	0.995377	0.994956	0.994138	0.995583
1:Antistreptavidin IgG2 HC	268	N268(N268K)[AAC] (1 base change)	Sequence Variant (1 base change)	1:T248-N268 = 2400.0791m(N268K)	TPEVTCVVVDVSHEDPEVQFN	0.999048	0.99938	0.999529	0.99963	0.99942	0.999162	0.999361
1:Antistreptavidin IgG2 HC	269	W269+Double Oxidation	+Double Oxidation	1:T248-K280 = 3797.7519m(W269+Double Oxidation)	TPEVTCVVVDVSHEDPEVQFNWYVDGVEVHNAK	0.999615	0.999663	0.999553	0.999695	0.999594	0.999621	0.999624
1:Antistreptavidin IgG2 HC	280	~K280+Glycation	+Glycation	1:T248-R284 = 4280.0484m(~K280+Glycation)	TPEVTCVVVDVSHEDPEVQFNWYVDGVEVHNAKTKPR	0.995422	0.993424	0.995539	0.994512	0.995524	0.996192	0.995102
1:Antistreptavidin IgG2 HC	289	N289+A1G0	N-Glycan	1:E285-R293 = 1156.5149m(N289+A1G0)	EEQFNSTFR	0.4066	0.396462	0.405591	0.405878	0.401641	0.395511	0.401947
1:Antistreptavidin IgG2 HC	289	N289+A1G0F	N-Glycan	1:E285-R293 = 1156.5149m(N289+A1G0F)	EEQFNSTFR	0.4066	0.396462	0.405591	0.405878	0.401641	0.395511	0.401947
1:Antistreptavidin IgG2 HC	289	N289+A1G0M4	N-Glycan	1:E285-R293 = 1156.5149m(N289+A1G0M4)	EEQFNSTFR	0.4066	0.396462	0.405591	0.405878	0.401641	0.395511	0.401947
1:Antistreptavidin IgG2 HC	289	N289+A1G0M5	N-Glycan	1:E285-R293 = 1156.5149m(N289+A1G0M5)	EEQFNSTFR	0.4066	0.396462	0.405591	0.405878	0.401641	0.395511	0.401947
1:Antistreptavidin IgG2 HC	289	N289+A1G0M5F	N-Glycan	1:E285-R293 = 1156.5149m(N289+A1G0M5F)	EEQFNSTFR	0.4066	0.396462	0.405591	0.405878	0.401641	0.395511	0.401947
1:Antistreptavidin IgG2 HC	289	N289+A1G1	N-Glycan	1:E285-R293 = 1156.5149m(N289+A1G1)	EEQFNSTFR	0.4066	0.396462	0.405591	0.405878	0.401641	0.395511	0.401947
1:Antistreptavidin IgG2 HC	289	N289+A1G1F	N-Glycan	1:E285-R293 = 1156.5149m(N289+A1G1F)	EEQFNSTFR	0.4066	0.396462	0.405591	0.405878	0.401641	0.395511	0.401947
1:Antistreptavidin IgG2 HC	289	N289+A1G1M4	N-Glycan	1:E285-R293 = 1156.5149m(N289+A1G1M4)	EEQFNSTFR	0.4066	0.396462	0.405591	0.405878	0.401641	0.395511	0.401947
1:Antistreptavidin IgG2 HC	289	N289+A1G1M4F	N-Glycan	1:E285-R293 = 1156.5149m(N289+A1G1M4F)	EEQFNSTFR	0.4066	0.396462	0.405591	0.405878	0.401641	0.395511	0.401947
1:Antistreptavidin IgG2 HC	289	N289+A1G1M5	N-Glycan	1:E285-R293 = 1156.5149m(N289+A1G1M5)	EEQFNSTFR	0.4066	0.396462	0.405591	0.405878	0.401641	0.395511	0.401947
1:Antistreptavidin IgG2 HC	289	N289+A1G1M5F	N-Glycan	1:E285-R293 = 1156.5149m(N289+A1G1M5F)	EEQFNSTFR	0.4066	0.396462	0.405591	0.405878	0.401641	0.395511	0.401947
1:Antistreptavidin IgG2 HC	289	N289+A1S1	N-Glycan	1:E285-R293 = 1156.5149m(N289+A1S1)	EEQFNSTFR	0.4066	0.396462	0.405591	0.405878	0.401641	0.395511	0.401947
1:Antistreptavidin IgG2 HC	289	N289+A1S1F	N-Glycan	1:E285-R293 = 1156.5149m(N289+A1S1F)	EEQFNSTFR	0.4066	0.396462	0.405591	0.405878	0.401641	0.395511	0.401947
1:Antistreptavidin IgG2 HC	289	N289+A1S1M4	N-Glycan	1:E285-R293 = 1156.5149m(N289+A1S1M4)	EEQFNSTFR	0.4066	0.396462	0.405591	0.405878	0.401641	0.395511	0.401947
1:Antistreptavidin IgG2 HC	289	N289+A1S1M4F	N-Glycan	1:E285-R293 = 1156.5149m(N289+A1S1M4F)	EEQFNSTFR	0.4066	0.396462	0.405591	0.405878	0.401641	0.395511	0.401947
1:Antistreptavidin IgG2 HC	289	N289+A1S1M5	N-Glycan	1:E285-R293 = 1156.5149m(N289+A1S1M5)	EEQFNSTFR	0.4066	0.396462	0.405591	0.405878	0.401641	0.395511	0.401947
1:Antistreptavidin IgG2 HC	289	N289+A1S1M5F	N-Glycan	1:E285-R293 = 1156.5149m(N289+A1S1M5F)	EEQFNSTFR	0.4066	0.396462	0.405591	0.405878	0.401641	0.395511	0.401947
1:Antistreptavidin IgG2 HC	289	N289+A2G0	N-Glycan	1:E285-R293 = 1156.5149m(N289+A2G0)	EEQFNSTFR	0.4066	0.396462	0.405591	0.405878	0.401641	0.395511	0.401947
1:Antistreptavidin IgG2 HC	289	N289+A2G0F	N-Glycan	1:E285-R293 = 1156.5149m(N289+A2G0F)	EEQFNSTFR	0.4066	0.396462	0.405591	0.405878	0.401641	0.395511	0.401947
1:Antistreptavidin IgG2 HC	289	N289+A2G1	N-Glycan	1:E285-R293 = 1156.5149m(N289+A2G1)	EEQFNSTFR	0.4066	0.396462	0.405591	0.405878	0.401641	0.395511	0.401947
1:Antistreptavidin IgG2 HC	289	N289+A2G1F	N-Glycan	1:E285-R293 = 1156.5149m(N289+A2G1F)	EEQFNSTFR	0.4066	0.396462	0.405591	0.405878	0.401641	0.395511	0.401947
1:Antistreptavidin IgG2 HC	289	N289+A2G2	N-Glycan	1:E285-R293 = 1156.5149m(N289+A2G2)	EEQFNSTFR	0.4066	0.396462	0.405591	0.405878	0.401641	0.395511	0.401947
1:Antistreptavidin IgG2 HC	289	N289+A2G2F	N-Glycan	1:E285-R293 = 1156.5149m(N289+A2G2F)	EEQFNSTFR	0.4066	0.396462	0.405591	0.405878	0.401641	0.395511	0.401947
1:Antistreptavidin IgG2 HC	289	N289+A2S1G0F	N-Glycan	1:E285-R293 = 1156.5149m(N289+A2S1G0F)	EEQFNSTFR	0.4066	0.396462	0.405591	0.405878	0.401641	0.395511	0.401947
1:Antistreptavidin IgG2 HC	289	N289+A2S1G1F	N-Glycan	1:E285-R293 = 1156.5149m(N289+A2S1G1F)	EEQFNSTFR	0.4066	0.396462	0.405591	0.405878	0.401641	0.395511	0.401947
1:Antistreptavidin IgG2 HC	289	N289+A2S2F	N-Glycan	1:E285-R293 = 1156.5149m(N289+A2S2F)	EEQFNSTFR	0.4066	0.396462	0.405591	0.405878	0.401641	0.395511	0.401947
1:Antistreptavidin IgG2 HC	289	N289+A3G1F	N-Glycan	1:E285-R293 = 1156.5149m(N289+A3G1F)	EEQFNSTFR	0.4066	0.396462	0.405591	0.405878	0.401641	0.395511	0.401947
1:Antistreptavidin IgG2 HC	289	N289+A3G2F	N-Glycan	1:E285-R293 = 1156.5149m(N289+A3G2F)	EEQFNSTFR	0.4066	0.396462	0.405591	0.405878	0.401641	0.395511	0.401947
1:Antistreptavidin IgG2 HC	289	N289+Deamidation	+Deamidation	1:E285-R293 = 1156.5149m(N289+Deamidation)	EEQFNSTFR	0.4066	0.396462	0.405591	0.405878	0.401641	0.395511	0.401947
1:Antistreptavidin IgG2 HC	289	N289+Gn	N-Glycan	1:E285-R293 = 1156.5149m(N289+Gn)	EEQFNSTFR	0.4066	0.396462	0.405591	0.405878	0.401641	0.395511	0.401947
1:Antistreptavidin IgG2 HC	289	N289+M5	N-Glycan	1:E285-R293 = 1156.5149m(N289+M5)	EEQFNSTFR	0.4066	0.396462	0.405591	0.405878	0.401641	0.395511	0.401947
1:Antistreptavidin IgG2 HC	289	N289+M6	N-Glycan	1:E285-R293 = 1156.5149m(N289+M6)	EEQFNSTFR	0.4066	0.396462	0.405591	0.405878	0.401641	0.395511	0.401947
1:Antistreptavidin IgG2 HC	289	N289+M7	N-Glycan	1:E285-R293 = 1156.5149m(N289+M7)	EEQFNSTFR	0.4066	0.396462	0.405591	0.405878	0.401641	0.395511	0.401947
1:Antistreptavidin IgG2 HC	289	N289+M8	N-Glycan	1:E285-R293 = 1156.5149m(N289+M8)	EEQFNSTFR	0.4066	0.396462	0.405591	0.405878	0.401641	0.395511	0.401947
1:Antistreptavidin IgG2 HC	289	N289+M9	N-Glycan	1:E285-R293 = 1156.5149m(N289+M9)	EEQFNSTFR	0.4066	0.396462	0.405591	0.405878	0.401641	0.395511	0.401947
1:Antistreptavidin IgG2 HC	289	N289+Unglycosylated	N-Glycan	1:E285-R293 = 1156.5149m(N289+Unglycosylated)	EEQFNSTFR	0.4066	0.396462	0.405591	0.405878	0.401641	0.395511	0.401947
1:Antistreptavidin IgG2 HC	294	V294(V294M)[GTG] (1 base change)	Sequence Variant (1 base change)	1:V294-K309 = 1792.9836m(V294M)	VVSVLTVVHQDWLNGK	0.999942	0.99993	0.99994	0.999942	0.999939	0.999942	0.999939
1:Antistreptavidin IgG2 HC	296	S296(S296N)[AGC] (1 base change)	Sequence Variant (1 base change)	1:V294-K309 = 1792.9836m(S296N)	VVSVLTVVHQDWLNGK	0.99983	0.999789	0.999826	0.999833	0.999839	0.999839	0.999826
1:Antistreptavidin IgG2 HC	297	V297(V297A)[GTC] (1 base change)	Sequence Variant (1 base change)	1:V294-K309 = 1792.9836m(V297A)	VVSVLTVVHQDWLNGK	0.999643	0.999653	0.99965	0.999653	0.999657	0.999654	0.999652
1:Antistreptavidin IgG2 HC	297	V297(V297I)[GTC] (1 base change)	Sequence Variant (1 base change)	1:V294-K309 = 1792.9836m(V297I)	VVSVLTVVHQDWLNGK	0.999643	0.999653	0.99965	0.999653	0.999657	0.999654	0.999652
1:Antistreptavidin IgG2 HC	300	V300(V300I)[GTT] (1 base change)	Sequence Variant (1 base change)	1:V294-K309 = 1792.9836m(V300I)	VVSVLTVVHQDWLNGK	0.999851	0.999851	0.999846	0.999856	0.999855	0.999849	0.999851
1:Antistreptavidin IgG2 HC	302	H302+Double Oxidation	+Double Oxidation	1:V294-K309 = 1792.9836m(H302+Double Oxidation)	VVSVLTVVHQDWLNGK	0.999921	0.999943	0.999934	0.999936	0.999939	0.999932	0.999934
1:Antistreptavidin IgG2 HC	302	H302(H302Q)[CAC] (1 base change)	Sequence Variant (1 base change)	1:V294-K309 = 1792.9836m(H302Q)	VVSVLTVVHQDWLNGK	0.999921	0.999943	0.999934	0.999936	0.999939	0.999932	0.999934
1:Antistreptavidin IgG2 HC	304	D304+H2O loss	+H2O loss	1:V294-K309 = 1792.9836m(D304+H2O loss)	VVSVLTVVHQDWLNGK	0.998725	0.99915	0.998847	0.998789	0.998856	0.998966	0.998889
1:Antistreptavidin IgG2 HC	305	W305+Double Oxidation	+Double Oxidation	1:V294-K309 = 1792.9836m(W305+Double Oxidation)	VVSVLTVVHQDWLNGK	0.999389	0.999317	0.999268	0.999458	0.999391	0.999207	0.999338
1:Antistreptavidin IgG2 HC	305	W305+Oxidation	+Oxidation	1:V294-K309 = 1792.9836m(W305+Oxidation)	VVSVLTVVHQDWLNGK	0.999389	0.999317	0.999268	0.999458	0.999391	0.999207	0.999338
1:Antistreptavidin IgG2 HC	307	N307+Deamidation	+Deamidation	1:V294-K309 = 1792.9836m(N307+Deamidation)	VVSVLTVVHQDWLNGK	0.970507	0.96823	0.970342	0.970956	0.971321	0.972197	0.970592
1:Antistreptavidin IgG2 HC	307	N307+NH3 loss	+NH3 loss	1:V294-K309 = 1792.9836m(N307+NH3 loss)	VVSVLTVVHQDWLNGK	0.970507	0.96823	0.970342	0.970956	0.971321	0.972197	0.970592
1:Antistreptavidin IgG2 HC	309	K309+Glycation	+Glycation	1:V294-K312 = 2213.1845m(K309+Glycation)	VVSVLTVVHQDWLNGKEYK	0.99932	0.999223	0.99929	0.999235	0.999266	0.99926	0.999266
1:Antistreptavidin IgG2 HC	318	K318+Glycation	+Glycation	1:C313-K326 = 1540.8283m(K318+Glycation)	CKVSNKGLPAPIEK	0.999981	0.999998	0.999988	0.999985	0.999996	0.999996	0.999991
1:Antistreptavidin IgG2 HC	319	G319(G319S)[GGC] (1 base change)	Sequence Variant (1 base change)	1:G319-K326 = 823.48035m(G319S)	GLPAPIEK	0.99993	0.999928	0.999925	0.999931	0.999925	0.99993	0.999928
1:Antistreptavidin IgG2 HC	321	P321+Hydroxylation	+Hydroxylation	1:G319-K326 = 823.4804m(P321+Hydroxylation)	GLPAPIEK	0.997799	0.997708	0.997835	0.997914	0.997924	0.99786	0.99784
1:Antistreptavidin IgG2 HC	352	K352+Glycation	+Glycation	1:E348-K362 = 1779.8747m(K352+Glycation)	EEMTKNQVSLTCLVK	0.999562	0.999605	0.99953	0.999518	0.999533	0.999512	0.999543
1:Antistreptavidin IgG2 HC	353	~N353+NH3 loss	+NH3 loss	1:N353-K362 = 1161.6064m(~N353+NH3 loss)	NQVSLTCLVK	0.998795	0.998984	0.998924	0.998925	0.998945	0.998952	0.998921
1:Antistreptavidin IgG2 HC	353	N353(N353K)[AAC] (1 base change)	Sequence Variant (1 base change)	1:N353-K362 = 1161.6064m(N353K)	NQVSLTCLVK	0.998795	0.998984	0.998924	0.998925	0.998945	0.998952	0.998921
1:Antistreptavidin IgG2 HC	359	C359(C359Y)[TGC] (1 base change)	Sequence Variant (1 base change)	1:N353-K362 = 1161.6064m(C359Y)	NQVSLTCLVK	0.999843	0.999855	0.999857	0.999851	0.999851	0.99986	0.999853
1:Antistreptavidin IgG2 HC	362	K362+Hydroxylation	+Hydroxylation	1:N353-K362 = 1161.6064m(K362+Hydroxylation)	NQVSLTCLVK	0.999854	0.999896	0.999832	0.999859	0.999838	0.999835	0.999852
1:Antistreptavidin IgG2 HC	362	K362+Glycation	+Glycation	1:N353-K384 = 3686.7199m(K362+Glycation)	NQVSLTCLVKGFYPSDIAVEWESNGQPENNYK	0.999854	0.999896	0.999832	0.999859	0.999838	0.999835	0.999852
1:Antistreptavidin IgG2 HC	368	D368(D368N)[GAC] (1 base change)	Sequence Variant (1 base change)	1:G363-K384 = 2543.1241m(D368N)	GFYPSDIAVEWESNGQPENNYK	0.999934	0.999925	0.999919	0.999927	0.999907	0.999939	0.999925
1:Antistreptavidin IgG2 HC	370	A370(A370T)[GCC] (1 base change)	Sequence Variant (1 base change)	1:G363-K384 = 2543.1241m(A370T)	GFYPSDIAVEWESNGQPENNYK	0.999939	0.999933	0.999899	0.999932	0.999922	0.999926	0.999925
1:Antistreptavidin IgG2 HC	375	S375(S375N)[AGC] (1 base change)	Sequence Variant (1 base change)	1:G363-K384 = 2543.1241m(S375N)	GFYPSDIAVEWESNGQPENNYK	0.999857	0.999878	0.999841	0.999808	0.999822	0.99985	0.999843
1:Antistreptavidin IgG2 HC	376	~N376+Deamidation	+Deamidation	1:G363-K384 = 2543.1241m(~N376+Deamidation)	GFYPSDIAVEWESNGQPENNYK	0.973366	0.972203	0.968098	0.969107	0.970686	0.972727	0.971031
1:Antistreptavidin IgG2 HC	376	~N376+NH3 loss	+NH3 loss	1:G363-K384 = 2543.1241m(~N376+NH3 loss)	GFYPSDIAVEWESNGQPENNYK	0.973366	0.972203	0.968098	0.969107	0.970686	0.972727	0.971031
1:Antistreptavidin IgG2 HC	382	~N382+NH3 loss	+NH3 loss	1:G363-K384 = 2543.1241m(~N382+NH3 loss)	GFYPSDIAVEWESNGQPENNYK	0.995928	0.995746	0.995464	0.995982	0.995868	0.995975	0.995827
1:Antistreptavidin IgG2 HC	384	K384+Glycation	+Glycation	1:G363-K401 = 4430.0001m(K384+Glycation)	GFYPSDIAVEWESNGQPENNYKTTPPMLDSDGSFFLYSK	0.999654	0.999807	0.999631	0.999622	0.999683	0.999729	0.999687
1:Antistreptavidin IgG2 HC	389	M389(M389I)[ATG] (1 base change)	Sequence Variant (1 base change)	1:T385-K401 = 1904.8866m(M389I)	TTPPMLDSDGSFFLYSK	0.999857	0.999893	0.999864	0.999846	0.999855	0.999871	0.999864
1:Antistreptavidin IgG2 HC	393	D393+H2O loss	+H2O loss	1:T385-K401 = 1904.8866m(D393+H2O loss)	TTPPMLDSDGSFFLYSK	0.994622	0.99561	0.994331	0.994163	0.994324	0.994495	0.994591
1:Antistreptavidin IgG2 HC	400	S400(S400N)[AGC] (1 base change)	Sequence Variant (1 base change)	1:T385-K401 = 1904.8866m(S400N)	TTPPMLDSDGSFFLYSK	0.99981	0.999841	0.999809	0.99979	0.999814	0.9998	0.999811
1:Antistreptavidin IgG2 HC	420	M420+Oxidation	+Oxidation	1:W409-K431 = 2801.2439m(M420+Oxidation)	WQQGNVFSCSVMHEALHNHYTQK	0.992253	0.991091	0.991392	0.991475	0.991301	0.991535	0.991508
1:Antistreptavidin IgG2 HC	420	M420(M420I)[ATG] (1 base change)	Sequence Variant (1 base change)	1:W409-K431 = 2801.2439m(M420I)	WQQGNVFSCSVMHEALHNHYTQK	0.992253	0.991091	0.991392	0.991475	0.991301	0.991535	0.991508
1:Antistreptavidin IgG2 HC	426	N426+Deamidation	+Deamidation	1:W409-K431 = 2801.2439m(N426+Deamidation)	WQQGNVFSCSVMHEALHNHYTQK	0.992526	0.991828	0.991575	0.991451	0.991327	0.991675	0.99173
1:Antistreptavidin IgG2 HC	426	N426+NH3 loss	+NH3 loss	1:W409-K431 = 2801.2439m(N426+NH3 loss)	WQQGNVFSCSVMHEALHNHYTQK	0.992526	0.991828	0.991575	0.991451	0.991327	0.991675	0.99173
1:Antistreptavidin IgG2 HC	436	S436(S436N)[TCT] (2 base change)	Sequence Variant (2 base change)	1:S432-G438 = 659.34901m(S436N)	SLSLSPG	0.999449	0.999451	0.999429	0.999433	0.999392	0.999466	0.999437
1:Antistreptavidin IgG2 HC	438	G438-58.0054	Unknown Modification	1:S432-G438 = 659.34901m(G438-58.0054)	SLSLSPG	0.968038	0.974503	0.972212	0.972378	0.973094	0.970982	0.971868
1:Antistreptavidin IgG2 HC	438	G438+Lys	+Lys	1:S432-G438 = 659.34901m(G438+Lys)	SLSLSPG	0.968038	0.974503	0.972212	0.972378	0.973094	0.970982	0.971868
2:Antistreptavidin IgG2 LC	1	Q1+17.0265	N-Terminal Extension	2:Q1-R17 = 1676.8482m(Q1+17.0265)	QSVVTQPPSVSGAPGQR	0.908097	0.911422	0.903831	0.903081	0.908462	0.917229	0.908687
2:Antistreptavidin IgG2 LC	2	S2+N-term clip	N-term Clip	2:S2-R17 = 1565.8162m[nonspecific]	SVVTQPPSVSGAPGQR	0.999023	0.999185	0.999022	0.998964	0.998991	0.998999	0.999031
2:Antistreptavidin IgG2 LC	5	~T5+GalNAc	O-Glycan	2:Q1-R17 = 1676.8482m(~T5+GalNAc)	QSVVTQPPSVSGAPGQR	0.999819	0.999775	0.999839	0.999773	0.999787	0.999834	0.999805
2:Antistreptavidin IgG2 LC	14	P14+Hydroxylation	+Hydroxylation	2:Q1-R17 = 1676.8482m(P14+Hydroxylation)	QSVVTQPPSVSGAPGQR	0.997567	0.997671	0.997701	0.99759	0.997552	0.99767	0.997625
2:Antistreptavidin IgG2 LC	17	R17(R17K)[AGG] (1 base change)	Sequence Variant (1 base change)	2:Q1-R17 = 1676.8482m(R17K)	QSVVTQPPSVSGAPGQR	0.999789	0.999805	0.999817	0.99978	0.999775	0.999794	0.999793
2:Antistreptavidin IgG2 LC	24	G24(G24R)[GGG] (1 base change)	Sequence Variant (1 base change)	2:V18-G24 = 737.3266m(G24R)	VTISCTG	0.999916	0.999886	0.999884	0.999881	0.999894	0.999894	0.999893
2:Antistreptavidin IgG2 LC	28	N28(N28K)[AAC] (1 base change)	Sequence Variant (1 base change)	2:V18-N28 = 1112.4656m(N28K)	VTISCTGSSSN	0.999954	0.999921	0.999933	0.999931	0.999926	0.999924	0.999932
2:Antistreptavidin IgG2 LC	30	G30(G30R)[GGG] (1 base change)	Sequence Variant (1 base change)	2:V18-G30 = 1282.5711m(G30R)	VTISCTGSSSNIG	0.999928	0.999897	0.999894	0.999903	0.999891	0.9999	0.999902
2:Antistreptavidin IgG2 LC	32	G32+N-term clip	N-term Clip	2:G32-K47 = 1858.9002m[nonspecific]	GYDVHWYQQLPGTAPK	0.999828	0.999819	0.999817	0.9998	0.999829	0.99983	0.999821
2:Antistreptavidin IgG2 LC	36	H36(H36Q)[CAC] (1 base change)	Sequence Variant (1 base change)	2:V18-K47 = 3194.4979m(H36Q)	VTISCTGSSSNIGAGYDVHWYQQLPGTAPK	0.999922	0.999912	0.999892	0.999892	0.999896	0.999922	0.999906
2:Antistreptavidin IgG2 LC	37	W37+Double Oxidation	+Double Oxidation	2:V18-K47 = 3194.4979m(W37+Double Oxidation)	VTISCTGSSSNIGAGYDVHWYQQLPGTAPK	0.998892	0.999218	0.99886	0.998953	0.999072	0.998814	0.998968
2:Antistreptavidin IgG2 LC	37	W37+Oxidation	+Oxidation	2:V18-K47 = 3194.4979m(W37+Oxidation)	VTISCTGSSSNIGAGYDVHWYQQLPGTAPK	0.998892	0.999218	0.99886	0.998953	0.999072	0.998814	0.998968
2:Antistreptavidin IgG2 LC	48	L48(L48F)[CTC] (1 base change)	Sequence Variant (1 base change)	2:L48-R63 = 1756.9220m(L48F)	LLIYGNSNRPSGVPDR	0.999879	0.999877	0.999867	0.999869	0.999873	0.999877	0.999874
2:Antistreptavidin IgG2 LC	52	G52(G52D)[GGT] (1 base change)	Sequence Variant (1 base change)	2:L48-R63 = 1756.9220m(G52D)	LLIYGNSNRPSGVPDR	0.999951	0.999964	0.999937	0.999946	0.99996	0.999944	0.999951
2:Antistreptavidin IgG2 LC	53	N53(N53K)[AAC] (1 base change)	Sequence Variant (1 base change)	2:L48-N53 = 691.39048m(N53K)	LLIYGN	0.995213	0.995192	0.995051	0.995079	0.994832	0.994985	0.995059
2:Antistreptavidin IgG2 LC	53	N53+Deamidation	+Deamidation	2:L48-R63 = 1756.9220m(N53+Deamidation)	LLIYGNSNRPSGVPDR	0.995213	0.995192	0.995051	0.995079	0.994832	0.994985	0.995059
2:Antistreptavidin IgG2 LC	54	~S54+GalNAc-3SG	O-Glycan	2:L48-R63 = 1756.9220m(~S54+GalNAc-3SG)	LLIYGNSNRPSGVPDR	0.999792	0.999807	0.999764	0.999767	0.999769	0.999785	0.999781
2:Antistreptavidin IgG2 LC	59	G59(G59E)[GGG] (1 base change)	Sequence Variant (1 base change)	2:L48-R63 = 1756.9220m(G59E)	LLIYGNSNRPSGVPDR	0.999953	0.999952	0.999955	0.999951	0.999951	0.999956	0.999953
2:Antistreptavidin IgG2 LC	83	E83(E83K)[GAG] (1 base change)	Sequence Variant (1 base change)	2:S69-E83 = 1404.7096m(E83K)	SGTSASLAITGLQAE	0.999693	0.999538	0.999596	0.999625	0.999552	0.999553	0.999593
2:Antistreptavidin IgG2 LC	98	S98+N-term clip	N-term Clip	2:S98-K108 = 1128.5815m[nonspecific]	SGLYVFGTGTK	0.997088	0.992819	0.996721	0.994999	0.994836	0.996676	0.995523
2:Antistreptavidin IgG2 LC	100	L100+N-term clip	N-term Clip	2:L100-K108 = 984.5280m[nonspecific]	LYVFGTGTK	0.999905	0.99986	0.999903	0.999881	0.999898	0.99991	0.999893
2:Antistreptavidin IgG2 LC	108	K108+Glycation	+Glycation	2:S69-K116 = 5035.3808m(K108+Glycation)	SGTSASLAITGLQAEDEADYYCQSYDSSLSGLYVFGTGTKVTVLGQPK	0.998262	0.998516	0.997939	0.998047	0.997975	0.997957	0.998116
2:Antistreptavidin IgG2 LC	109	V109(V109I)[GTC] (1 base change)	Sequence Variant (1 base change)	2:V109-K116 = 840.5069m(V109I)	VTVLGQPK	0.999905	0.999881	0.999887	0.999888	0.999892	0.999891	0.999891
2:Antistreptavidin IgG2 LC	111	V111(V111A)[GTC] (1 base change)	Sequence Variant (1 base change)	2:V109-K116 = 840.5069m(V111A)	VTVLGQPK	0.999754	0.999727	0.999739	0.999739	0.999728	0.999741	0.999738
2:Antistreptavidin IgG2 LC	111	V111(V111I)[GTC] (1 base change)	Sequence Variant (1 base change)	2:V109-K116 = 840.5069m(V111I)	VTVLGQPK	0.999754	0.999727	0.999739	0.999739	0.999728	0.999741	0.999738
2:Antistreptavidin IgG2 LC	114	Q114+Deamidation	+Deamidation	2:V109-K116 = 840.5069m(Q114+Deamidation)	VTVLGQPK	0.999933	0.999934	0.999935	0.999937	0.999939	0.999937	0.999936
2:Antistreptavidin IgG2 LC	144	D144+H2O loss	+H2O loss	2:A136-K155 = 2211.1286m(D144+H2O loss)	ATLVCLISDFYPGAVTVAWK	0.996556	0.997293	0.996504	0.99689	0.996922	0.997644	0.996968
2:Antistreptavidin IgG2 LC	144	D144(D144G)[GAC] (1 base change)	Sequence Variant (1 base change)	2:A136-K155 = 2211.1286m(D144G)	ATLVCLISDFYPGAVTVAWK	0.996556	0.997293	0.996504	0.99689	0.996922	0.997644	0.996968
2:Antistreptavidin IgG2 LC	154	W154+Double Oxidation	+Double Oxidation	2:A136-K155 = 2211.1286m(W154+Double Oxidation)	ATLVCLISDFYPGAVTVAWK	0.997784	0.996655	0.995873	0.997673	0.996832	0.996367	0.996864
2:Antistreptavidin IgG2 LC	154	W154+Oxidation	+Oxidation	2:A136-K155 = 2211.1286m(W154+Oxidation)	ATLVCLISDFYPGAVTVAWK	0.997784	0.996655	0.995873	0.997673	0.996832	0.996367	0.996864
2:Antistreptavidin IgG2 LC	154	W154+Oxidation to kynurenine	+Oxidation to kynurenine	2:A136-K155 = 2211.1286m(W154+Oxidation to kynurenine)	ATLVCLISDFYPGAVTVAWK	0.997784	0.996655	0.995873	0.997673	0.996832	0.996367	0.996864
2:Antistreptavidin IgG2 LC	155	K155+Glycation	+Glycation	2:A136-K162 = 2895.4728m(K155+Glycation)	ATLVCLISDFYPGAVTVAWKADSSPVK	0.988197	0.990389	0.987738	0.988089	0.988621	0.988407	0.988573
2:Antistreptavidin IgG2 LC	162	K162+Glycation	+Glycation	2:A156-K172 = 1673.8472m(K162+Glycation)	ADSSPVKAGVETTTPSK	0.999086	0.999137	0.999194	0.99903	0.99897	0.999148	0.999094
2:Antistreptavidin IgG2 LC	164	G164(G164E)[GGA] (1 base change)	Sequence Variant (1 base change)	2:A163-K172 = 989.5029m(G164E)	AGVETTTPSK	0.99989	0.999894	0.999893	0.999893	0.999896	0.999892	0.999893
2:Antistreptavidin IgG2 LC	165	V165(V165M)[GTG] (1 base change)	Sequence Variant (1 base change)	2:A163-K172 = 989.5029m(V165M)	AGVETTTPSK	0.999931	0.999936	0.999927	0.999946	0.999931	0.999949	0.999936
2:Antistreptavidin IgG2 LC	177	K177+Glycation	+Glycation	2:Q173-K192 = 2314.1230m(K177+Glycation)	QSNNKYAASSYLSLTPEQWK	0.999273	0.999052	0.999045	0.99901	0.998996	0.998953	0.999055
2:Antistreptavidin IgG2 LC	185	S185(S185R)[AGC] (1 base change)	Sequence Variant (1 base change)	2:Y178-S185 = 860.3916m(S185R)	YAASSYLS	0.999232	0.999215	0.999193	0.999158	0.999168	0.99914	0.999184
2:Antistreptavidin IgG2 LC	185	S185(S185N)[AGC] (1 base change)	Sequence Variant (1 base change)	2:Y178-K192 = 1742.8516m(S185N)	YAASSYLSLTPEQWK	0.999232	0.999215	0.999193	0.999158	0.999168	0.99914	0.999184
2:Antistreptavidin IgG2 LC	191	W191+Double Oxidation	+Double Oxidation	2:Y178-K192 = 1742.8516m(W191+Double Oxidation)	YAASSYLSLTPEQWK	0.999504	0.999626	0.999501	0.999483	0.999488	0.999173	0.999463
2:Antistreptavidin IgG2 LC	191	W191+Oxidation	+Oxidation	2:Y178-K192 = 1742.8516m(W191+Oxidation)	YAASSYLSLTPEQWK	0.999504	0.999626	0.999501	0.999483	0.999488	0.999173	0.999463
2:Antistreptavidin IgG2 LC	192	K192+Glycation	+Glycation	2:Y178-R195 = 2123.0436m(K192+Glycation)	YAASSYLSLTPEQWKSHR	0.99904	0.998791	0.998832	0.998776	0.998718	0.998627	0.998797
2:Antistreptavidin IgG2 LC	196	S196(S196N)[AGC] (1 base change)	Sequence Variant (1 base change)	2:S196-K210 = 1711.7359m(S196N)	SYSCQVTHEGSTVEK	0.999951	0.999968	0.999945	0.999948	0.999947	0.99994	0.99995
2:Antistreptavidin IgG2 LC	198	S198(S198N)[AGC] (1 base change)	Sequence Variant (1 base change)	2:S196-K210 = 1711.7359m(S198N)	SYSCQVTHEGSTVEK	0.999617	0.999569	0.999514	0.999545	0.999508	0.999556	0.999551
2:Antistreptavidin IgG2 LC	201	V201(V201I)[GTC] (1 base change)	Sequence Variant (1 base change)	2:S196-K210 = 1711.7359m(V201I)	SYSCQVTHEGSTVEK	0.999876	0.99985	0.999845	0.999848	0.999849	0.999851	0.999853
2:Antistreptavidin IgG2 LC	201	V201(V201M)[GTC] (2 base change)	Sequence Variant (2 base change)	2:S196-K210 = 1711.7359m(V201M)	SYSCQVTHEGSTVEK	0.999876	0.99985	0.999845	0.999848	0.999849	0.999851	0.999853
2:Antistreptavidin IgG2 LC	203	H203(H203Q)[CAT] (1 base change)	Sequence Variant (1 base change)	2:S196-K210 = 1711.7359m(H203Q)	SYSCQVTHEGSTVEK	0.999981	0.999977	0.999972	0.999975	0.999976	0.999976	0.999976
2:Antistreptavidin IgG2 LC	205	G205(G205D)[GGG] (2 base change)	Sequence Variant (2 base change)	2:S196-K210 = 1711.7359m(G205D)	SYSCQVTHEGSTVEK	0.999935	0.999925	0.999913	0.999916	0.999914	0.999929	0.999922
2:Antistreptavidin IgG2 LC	206	S206(S206N)[AGC] (1 base change)	Sequence Variant (1 base change)	2:S196-K210 = 1711.7359m(S206N)	SYSCQVTHEGSTVEK	0.999857	0.99984	0.999822	0.999826	0.999827	0.999829	0.999833
2:Antistreptavidin IgG2 LC	210	K210+Glycation	+Glycation	2:S196-S218 = 2558.0789m(K210+Glycation)	SYSCQVTHEGSTVEKTVAPTECS	0.999761	0.999729	0.999694	0.999709	0.999679	0.999711	0.999714

## Sheet: Reference Standard
Antistreptavidin IgG2 Control Runs
(a-Calibration)
Protein Sequence
>Antistreptavidin IgG2 HC
QLQLQESGPGLVKPSGTLSLTCAVSGGSISSGNWWSWVRQPPGKGLEWIGEISHSGTTNYNPSLKSRVTISGDKSKNQFSLELTSVTAADTAVYYCARNFDYWGQGTLVTVSSASTKGPSVFPLAPCSRSTSESTAALGCLVKDYFPEPVTVSWNSGALTSGVHTFPAVLQSSGLYSLSSVVTVPSSNFGTQTYTCNVDHKPSNTKVDKTVERKCCVECPPCPAPPVAGPSVFLFPPKPKDTLMISRTPEVTCVVVDVSHEDPEVQFNWYVDGVEVHNAKTKPREEQFNSTFRVVSVLTVVHQDWLNGKEYKCKVSNKGLPAPIEKTISKTKGQPREPQVYTLPPSREEMTKNQVSLTCLVKGFYPSDIAVEWESNGQPENNYKTTPPMLDSDGSFFLY…
>Antistreptavidin IgG2 LC
QSVVTQPPSVSGAPGQRVTISCTGSSSNIGAGYDVHWYQQLPGTAPKLLIYGNSNRPSGVPDRFSGSKSGTSASLAITGLQAEDEADYYCQSYDSSLSGLYVFGTGTKVTVLGQPKANPTVTLFPPSSEELQANKATLVCLISDFYPGAVTVAWKADSSPVKAGVETTTPSKQSNNKYAASSYLSLTPEQWKSHRSYSCQVTHEGSTVEKTVAPTECS
Protease = Trypsin
Cleaves at C-terminus of KR
Key Data Processing Parameters
MS Noise Level = 3600
S/N Threshold = 331
Typical Chromatographic Peak Width = 0.14
Maximum Chromatographic Peak Width = 1.61
Mass Tolerance = 5 ppm
Max Time Shift before Alignment = 3.18 min
Maximum Peptide Mass = 6800
Mass Accuracy = 6 ppm
Disulfide Bonds = Reduced
Glycosylation = CHO Glycan
Crosslinks = No
Minimum Confidence = 0.8
Mass Changes for Unspecified Modifications = -58 - 17
Amino Acid Substitutions = Common misincorporations
Ion Selection Criteria for Quantitation
Peptide Selection Criteria = 50% of the most abundant peptide
Charge Selection Criteria = 33% of the most abundant charge state
File Name						ATS_Try_C1 (2)	ATS_Try_C2 (2)	ATS_Try_C3 (2)	ATS_Try_C1 (3)	ATS_Try_C2 (3)	ATS_Try_C3 (3)	ATS_Try_C1 (4)	ATS_Try_C2 (4)	ATS_Try_C3 (4)	ATS_Try_C1 (5)	ATS_Try_C2 (5)	ATS_Try_C3 (5)
Sample Name						ATS_Try_control	ATS_Try_control	ATS_Try_control	ATS_Try_control	ATS_Try_control	ATS_Try_control	ATS control	ATS control	ATS control	ATS control	ATS control	ATS control
Sample Id						2	3	4	2	3	4	2	3	4	2	3	4
Comment						Expt #2A, Column peptide CSH15cm, HPLC:Knox, Biospin desalting	Expt #2A, Column peptide CSH15cm, HPLC:Knox, Biospin desalting	Expt #2A, Column peptide CSH15cm, HPLC:Knox, Biospin desalting	Expt #2A, Column peptide CSH15cm, HPLC:Knox, Microcon 30K digestion	Expt #2A, Column peptide CSH15cm, HPLC:Knox, Microcon 30K digestion	Expt #2A, Column peptide CSH15cm, HPLC:Knox, Microcon 30K digestion	MAM expt 2A- Biospin_ MS: Lumos, LC: 1290 (Knox), peptide CSHcolumn with FA	MAM expt 2A- Biospin_ MS: Lumos, LC: 1290 (Knox), peptide CSHcolumn with FA	MAM expt 2A- Biospin_ MS: Lumos, LC: 1290 (Knox), peptide CSHcolumn with FA	MAM expt 2A- Biospin_ MS: Lumos, LC: 1290 (Knox), peptide CSHcolumn with FA	MAM expt 2A- Biospin_ MS: Lumos, LC: 1290 (Knox), peptide CSHcolumn with FA	MAM expt 2A- Biospin_ MS: Lumos, LC: 1290 (Knox), peptide CSHcolumn with FA
Injection Time (h)						195.78	196.874	197.968	242.55	243.645	244.74	359.389	360.484	361.578	380.699	381.794	382.889
Quality Controls
			Relative Load			0.234	0.21	0.306	0.239	0.271	0.197	0.729	0.729	0.809	0.774	0.888	0.812
			Identification Rate (by area)			0.6772	0.6664	0.6778	0.6555	0.6839	0.6639	0.7226	0.7178	0.7239	0.7088	0.7235	0.7034
			Abundance of Top Unidentified (> 500 Da, relative to top identified)			0.3182	0.2734	0.3164	0.4107	0.3576	0.313	0.4166	0.2888	0.4093	0.5724	0.5527	0.4038
			Digestion Efficiency			0.9993	0.9996	0.9997	0.9925	0.9946	0.9883	0.9995	0.9997	0.9998	0.9957	0.9964	0.994
			Intensity&Length-Weighted Sequence Coverage			0.4325	0.4348	0.4523	0.4472	0.4433	0.454	0.5055	0.509	0.5141	0.5283	0.5311	0.5341
			Ions (Modified) Meeting Selection Criteria for Quantitation			317	320	320	318	318	321	321	321	321	321	321	321
Protein	Residue #	Modification	Category	Modified Peptides	Peptide Sequence	Abundance as Peak Area
1:Antistreptavidin IgG2 HC	1	Q1+17.0265	N-Terminal Extension	1:Q1-R39 = 4113.0266m(Q1+17.0265)	QLQLQESGPGLVKPSGTLSLTCAVSGGSISSGNWWSWVR	0.0182489	0.0182489	0.0182489	0.019422	0.019422	0.019422	0.00700431	0.00700431	0.00700431	0.00672946	0.00672946	0.00672946
1:Antistreptavidin IgG2 HC	13	K13+Glycation	+Glycation	1:Q1-R39 = 4113.0266m(K13+Glycation)	QLQLQESGPGLVKPSGTLSLTCAVSGGSISSGNWWSWVR	0.000163919	0.000163919	0.000163919	0.000165153	0.000165153	0.000165153	0.000169823	0.000169823	0.000169823	0.000231843	0.000231843	0.000231843
1:Antistreptavidin IgG2 HC	30	S30+C-term clip	C-term Clip	1:Q1-S30 = 2954.4907m[nonspecific]	QLQLQESGPGLVKPSGTLSLTCAVSGGSIS	0.000300354	0.000300354	0.000300354	0.000146524	0.000146524	0.000146524	0.000101126	0.000101126	0.000101126	6.22627e-05	6.22627e-05	6.22627e-05
1:Antistreptavidin IgG2 HC	31	S31+N-term clip	N-term Clip	1:S31-R39 = 1176.5465m[nonspecific]	SGNWWSWVR	0.00102605	0.00102605	0.00102605	0.00171698	0.00171698	0.00171698	0.000303247	0.000303247	0.000303247	0.000342931	0.000342931	0.000342931
1:Antistreptavidin IgG2 HC	34	~W34+Double Oxidation	+Double Oxidation	1:Q1-R39 = 4113.0266m(~W34+Double Oxidation)	QLQLQESGPGLVKPSGTLSLTCAVSGGSISSGNWWSWVR	0.000769436	0.000769436	0.000769436	0.000978361	0.000978361	0.000978361	0.00119306	0.00119306	0.00119306	0.00200496	0.00200496	0.00200496
1:Antistreptavidin IgG2 HC	34	~W34+Oxidation to kynurenine	+Oxidation to kynurenine	1:Q1-R39 = 4113.0266m(~W34+Oxidation to kynurenine)	QLQLQESGPGLVKPSGTLSLTCAVSGGSISSGNWWSWVR	0.00089872	0.00089872	0.00089872	0.00125174	0.00125174	0.00125174	0.000926673	0.000926673	0.000926673	0.000944826	0.000944826	0.000944826
1:Antistreptavidin IgG2 HC	37	~W37+Double Oxidation	+Double Oxidation	1:Q1-R39 = 4113.0266m(~W37+Double Oxidation)	QLQLQESGPGLVKPSGTLSLTCAVSGGSISSGNWWSWVR	0.000954494	0.000954494	0.000954494	0.00146071	0.00146071	0.00146071	0.00101636	0.00101636	0.00101636	0.00220735	0.00220735	0.00220735
1:Antistreptavidin IgG2 HC	44	K44+Glycation	+Glycation	1:Q40-K65 = 2809.4035m(K44+Glycation)	QPPGKGLEWIGEISHSGTTNYNPSLK	0.000334402	0.000334402	0.000334402	0.0003604	0.0003604	0.0003604	0.000229274	0.000229274	0.000229274	0.000248676	0.000248676	0.000248676
1:Antistreptavidin IgG2 HC	48	W48+Double Oxidation	+Double Oxidation	1:G45-K65 = 2302.1230m(W48+Double Oxidation)	GLEWIGEISHSGTTNYNPSLK	0.000467922	0.000467922	0.000467922	0.00110142	0.00110142	0.00110142	0.000387303	0.000387303	0.000387303	0.000823062	0.000823062	0.000823062
1:Antistreptavidin IgG2 HC	48	W48+Oxidation	+Oxidation	1:G45-K65 = 2302.1230m(W48+Oxidation)	GLEWIGEISHSGTTNYNPSLK	8.90291e-05	8.90291e-05	8.90291e-05	9.52503e-05	9.52503e-05	9.52503e-05	7.24188e-05	7.24188e-05	7.24188e-05	8.22443e-05	8.22443e-05	8.22443e-05
1:Antistreptavidin IgG2 HC	55	S55+C-term clip	C-term Clip	1:G45-S55 = 1226.5932m[nonspecific]	GLEWIGEISHS	4.02876e-05	4.02876e-05	4.02876e-05	5.91008e-05	5.91008e-05	5.91008e-05	3.44518e-06	3.44518e-06	3.44518e-06	2.57379e-05	2.57379e-05	2.57379e-05
1:Antistreptavidin IgG2 HC	56	G56(G56R)[GGG] (1 base change)	Sequence Variant (1 base change)	1:G45-G56 = 1283.6146m(G56R)	GLEWIGEISHSG	4.78008e-05	4.78008e-05	4.78008e-05	6.52394e-05	6.52394e-05	6.52394e-05	1.8637e-05	1.8637e-05	1.8637e-05	2.40122e-05	2.40122e-05	2.40122e-05
1:Antistreptavidin IgG2 HC	56	G56+N-term clip	N-term Clip	1:G56-K65 = 1093.5404m[nonspecific]	GTTNYNPSLK	9.50914e-05	9.50914e-05	9.50914e-05	7.20173e-05	7.20173e-05	7.20173e-05	4.87975e-05	4.87975e-05	4.87975e-05	5.37475e-05	5.37475e-05	5.37475e-05
1:Antistreptavidin IgG2 HC	59	N59(N59K)[AAC] (1 base change)	Sequence Variant (1 base change)	1:G45-N59 = 1599.7529m(N59K)	GLEWIGEISHSGTTN	7.76859e-05	7.76859e-05	7.76859e-05	0.000103033	0.000103033	0.000103033	3.22829e-05	3.22829e-05	3.22829e-05	3.83932e-05	3.83932e-05	3.83932e-05
1:Antistreptavidin IgG2 HC	65	K65+Glycation	+Glycation	1:G45-R67 = 2545.2561m(K65+Glycation)	GLEWIGEISHSGTTNYNPSLKSR	0.000327419	0.000327419	0.000327419	0.000356616	0.000356616	0.000356616	0.000167213	0.000167213	0.000167213	0.00019428	0.00019428	0.00019428
1:Antistreptavidin IgG2 HC	67	R67(R67Q)[CGA] (1 base change)	Sequence Variant (1 base change)	1:S66-K74 = 961.5193m(R67Q)	SRVTISGDK	7.48702e-05	7.48702e-05	7.48702e-05	6.53581e-05	6.53581e-05	6.53581e-05	0.00019734	0.00019734	0.00019734	0.000314872	0.000314872	0.000314872
1:Antistreptavidin IgG2 HC	68	V68(V68I)[GTC] (1 base change)	Sequence Variant (1 base change)	1:V68-K74 = 718.38612m(V68I)	VTISGDK	9.75011e-05	9.75011e-05	9.75011e-05	0.000103067	0.000103067	0.000103067	0.00018956	0.00018956	0.00018956	0.000295675	0.000295675	0.000295675
1:Antistreptavidin IgG2 HC	107	~T107+GalNAc-3SG	O-Glycan	1:N99-K117 = 2059.9851m(~T107+GalNAc-3SG)	NFDYWGQGTLVTVSSASTK	0.000434611	0.000434611	0.000434611	3.17983e-05	3.17983e-05	3.17983e-05	0.000135828	0.000135828	0.000135828	4.02925e-05	4.02925e-05	4.02925e-05
1:Antistreptavidin IgG2 HC	107	T107+N-term clip	N-term Clip	1:T107-K117 = 1092.6027m[nonspecific]	TLVTVSSASTK	4.15806e-05	4.15806e-05	4.15806e-05	3.82236e-05	3.82236e-05	3.82236e-05	1.15006e-05	1.15006e-05	1.15006e-05	8.41027e-06	8.41027e-06	8.41027e-06
1:Antistreptavidin IgG2 HC	117	K117+Hydroxylation	+Hydroxylation	1:N99-K117 = 2059.9851m(K117+Hydroxylation)	NFDYWGQGTLVTVSSASTK	0.0477732	0.0477732	0.0477732	0.0398585	0.0398585	0.0398585	0.0495596	0.0495596	0.0495596	0.0459074	0.0459074	0.0459074
1:Antistreptavidin IgG2 HC	120	~S120+GalNAc-3SG	O-Glycan	1:G118-R129 = 1287.6282m(~S120+GalNAc-3SG)	GPSVFPLAPCSR	7.09436e-05	7.09436e-05	7.09436e-05	8.0185e-05	8.0185e-05	8.0185e-05	0.000155225	0.000155225	0.000155225	0.000129845	0.000129845	0.000129845
1:Antistreptavidin IgG2 HC	121	V121(V121I)[GTC] (1 base change)	Sequence Variant (1 base change)	1:G118-R129 = 1287.6282m(V121I)	GPSVFPLAPCSR	9.03489e-05	9.03489e-05	9.03489e-05	9.57895e-05	9.57895e-05	9.57895e-05	4.78704e-05	4.78704e-05	4.78704e-05	5.08021e-05	5.08021e-05	5.08021e-05
1:Antistreptavidin IgG2 HC	122	F122(F122Y)[TTC] (1 base change)	Sequence Variant (1 base change)	1:G118-R129 = 1287.6282m(F122Y)	GPSVFPLAPCSR	8.229e-05	8.229e-05	8.229e-05	7.94298e-05	7.94298e-05	7.94298e-05	5.2917e-05	5.2917e-05	5.2917e-05	5.02857e-05	5.02857e-05	5.02857e-05
1:Antistreptavidin IgG2 HC	127	C127+C-term clip	C-term Clip	1:G118-C127 = 1044.4950m[nonspecific]	GPSVFPLAPC	0.000143336	0.000143336	0.000143336	8.19511e-05	8.19511e-05	8.19511e-05	4.99287e-05	4.99287e-05	4.99287e-05	2.87016e-05	2.87016e-05	2.87016e-05
1:Antistreptavidin IgG2 HC	127	C127(C127Y)[TGC] (1 base change)	Sequence Variant (1 base change)	1:G118-R129 = 1287.6282m(C127Y)	GPSVFPLAPCSR	2.90165e-05	2.90165e-05	2.90165e-05	4.92074e-05	4.92074e-05	4.92074e-05	1.11344e-05	1.11344e-05	1.11344e-05	2.12087e-05	2.12087e-05	2.12087e-05
1:Antistreptavidin IgG2 HC	129	R129(R129K)[AGG] (1 base change)	Sequence Variant (1 base change)	1:G118-R129 = 1287.6282m(R129K)	GPSVFPLAPCSR	6.88954e-05	6.88954e-05	6.88954e-05	6.81454e-05	6.81454e-05	6.81454e-05	3.89294e-05	3.89294e-05	3.89294e-05	4.09177e-05	4.09177e-05	4.09177e-05
1:Antistreptavidin IgG2 HC	131	T131+N-term clip	N-term Clip	1:T131-K143 = 1336.6544m[nonspecific]	TSESTAALGCLVK	9.21624e-05	9.21624e-05	9.21624e-05	7.49952e-05	7.49952e-05	7.49952e-05	5.98336e-05	5.98336e-05	5.98336e-05	4.96865e-05	4.96865e-05	4.96865e-05
1:Antistreptavidin IgG2 HC	132	S132+N-term clip	N-term Clip	1:S132-K143 = 1235.6068m[nonspecific]	SESTAALGCLVK	0.000358626	0.000358626	0.000358626	0.000382444	0.000382444	0.000382444	0.000273838	0.000273838	0.000273838	0.000292714	0.000292714	0.000292714
1:Antistreptavidin IgG2 HC	134	S134(S134N)[AGC] (1 base change)	Sequence Variant (1 base change)	1:S130-K143 = 1423.6865m(S134N)	STSESTAALGCLVK	0.000287526	0.000287526	0.000287526	0.000253953	0.000253953	0.000253953	0.000176776	0.000176776	0.000176776	0.000199338	0.000199338	0.000199338
1:Antistreptavidin IgG2 HC	134	S134+N-term clip	N-term Clip	1:S134-K143 = 1019.5321m[nonspecific]	STAALGCLVK	0.000523717	0.000523717	0.000523717	0.000455754	0.000455754	0.000455754	0.000203639	0.000203639	0.000203639	0.000229112	0.000229112	0.000229112
1:Antistreptavidin IgG2 HC	135	T135+N-term clip	N-term Clip	1:T135-K143 = 932.5001m[nonspecific]	TAALGCLVK	0.000142182	0.000142182	0.000142182	0.000105325	0.000105325	0.000105325	5.0481e-05	5.0481e-05	5.0481e-05	4.78484e-05	4.78484e-05	4.78484e-05
1:Antistreptavidin IgG2 HC	136	A136(A136T)[GCG] (1 base change)	Sequence Variant (1 base change)	1:S130-K143 = 1423.6865m(A136T)	STSESTAALGCLVK	3.33172e-05	3.33172e-05	3.33172e-05	3.41194e-05	3.41194e-05	3.41194e-05	2.37227e-05	2.37227e-05	2.37227e-05	2.91424e-05	2.91424e-05	2.91424e-05
1:Antistreptavidin IgG2 HC	140	C140(C140Y)[TGC] (1 base change)	Sequence Variant (1 base change)	1:S130-K143 = 1423.6865m(C140Y)	STSESTAALGCLVK	0.000186059	0.000186059	0.000186059	0.000224295	0.000224295	0.000224295	0.000129855	0.000129855	0.000129855	0.000135515	0.000135515	0.000135515
1:Antistreptavidin IgG2 HC	142	V142(V142I)[GTC] (1 base change)	Sequence Variant (1 base change)	1:S130-K143 = 1423.6865m(V142I)	STSESTAALGCLVK	4.42365e-05	4.42365e-05	4.42365e-05	4.89032e-05	4.89032e-05	4.89032e-05	3.19281e-05	3.19281e-05	3.19281e-05	3.71513e-05	3.71513e-05	3.71513e-05
1:Antistreptavidin IgG2 HC	154	~W154+Double Oxidation	+Double Oxidation	1:D144-K206 = 6763.2341m(~W154+Double Oxidation)	DYFPEPVTVSWNSGALTSGVHTFPAVLQSSGLYSLSSVVTVPSSNFGTQTYTCNVDHKPSNTK	0.00126945	0.00126945	0.00126945	0.0018538	0.0018538	0.0018538	0.00109469	0.00109469	0.00109469	0.00375954	0.00375954	0.00375954
1:Antistreptavidin IgG2 HC	154	W154+Oxidation	+Oxidation	1:D144-K206 = 6763.2341m(W154+Oxidation)	DYFPEPVTVSWNSGALTSGVHTFPAVLQSSGLYSLSSVVTVPSSNFGTQTYTCNVDHKPSNTK	0.0137745	0.0137745	0.0137745	0.0165699	0.0165699	0.0165699	0.0137683	0.0137683	0.0137683	0.0128343	0.0128343	0.0128343
1:Antistreptavidin IgG2 HC	155	N155(N155K)[AAC] (1 base change)	Sequence Variant (1 base change)	1:D144-N155 = 1452.6561m(N155K)	DYFPEPVTVSWN	0.000164069	0.000164069	0.000164069	0.000224994	0.000224994	0.000224994	4.56098e-05	4.56098e-05	4.56098e-05	6.73532e-05	6.73532e-05	6.73532e-05
1:Antistreptavidin IgG2 HC	158	A158+N-term clip	N-term Clip	1:A158-K206 = 5184.5350m[nonspecific]	ALTSGVHTFPAVLQSSGLYSLSSVVTVPSSNFGTQTYTCNVDHKPSNTK	2.64322e-05	2.64322e-05	2.64322e-05	4.04337e-05	4.04337e-05	4.04337e-05	4.24708e-05	4.24708e-05	4.24708e-05	7.5957e-05	7.5957e-05	7.5957e-05
1:Antistreptavidin IgG2 HC	160	T160+C-term clip	C-term Clip	1:D144-T160 = 1881.8785m[nonspecific]	DYFPEPVTVSWNSGALT	2.17361e-05	2.17361e-05	2.17361e-05	4.24321e-05	4.24321e-05	4.24321e-05	1.46034e-05	1.46034e-05	1.46034e-05	2.92786e-05	2.92786e-05	2.92786e-05
1:Antistreptavidin IgG2 HC	161	S161+N-term clip	N-term Clip	1:S161-K206 = 4899.3661m[nonspecific]	SGVHTFPAVLQSSGLYSLSSVVTVPSSNFGTQTYTCNVDHKPSNTK	0.000115215	0.000115215	0.000115215	0.000149529	0.000149529	0.000149529	7.07865e-05	7.07865e-05	7.07865e-05	0.000107511	0.000107511	0.000107511
1:Antistreptavidin IgG2 HC	191	T191+N-term clip	N-term Clip	1:T191-K206 = 1893.8527m[nonspecific]	TQTYTCNVDHKPSNTK	0.000299132	0.000299132	0.000299132	0.000498285	0.000498285	0.000498285	4.57606e-05	4.57606e-05	4.57606e-05	8.07534e-05	8.07534e-05	8.07534e-05
1:Antistreptavidin IgG2 HC	199	D199+H2O loss	+H2O loss	1:D144-K206 = 6763.2341m(D199+H2O loss)	DYFPEPVTVSWNSGALTSGVHTFPAVLQSSGLYSLSSVVTVPSSNFGTQTYTCNVDHKPSNTK	0.00643325	0.00643325	0.00643325	0.0055902	0.0055902	0.0055902	0.00547249	0.00547249	0.00547249	0.00495895	0.00495895	0.00495895
1:Antistreptavidin IgG2 HC	238	K238+Glycation	+Glycation	1:C215-K240 = 2911.3305m(K238+Glycation)	CCVECPPCPAPPVAGPSVFLFPPKPK	0.000942502	0.000942502	0.000942502	0.000959559	0.000959559	0.000959559	0.000946597	0.000946597	0.000946597	0.0011154	0.0011154	0.0011154
1:Antistreptavidin IgG2 HC	240	K240+Glycation	+Glycation	1:P239-R247 = 1059.5747m(K240+Glycation)	PKDTLMISR	0.0015024	0.0015024	0.0015024	0.000569057	0.000569057	0.000569057	0.000659695	0.000659695	0.000659695	0.000140708	0.000140708	0.000140708
1:Antistreptavidin IgG2 HC	241	D241+H2O loss	Artifact-Detection	1:D241-R247 = 834.42694m(D241+H2O loss)	DTLMISR	0.00419724	0.00419724	0.00419724	0.00431307	0.00431307	0.00431307	0.0198582	0.0198582	0.0198582	0.0215764	0.0215764	0.0215764
1:Antistreptavidin IgG2 HC	244	M244+Double Oxidation	+Double Oxidation	1:D241-R247 = 834.4269m(M244+Double Oxidation)	DTLMISR	3.25463e-05	3.25463e-05	3.25463e-05	3.21415e-05	3.21415e-05	3.21415e-05	6.48171e-06	6.48171e-06	6.48171e-06	1.18304e-05	1.18304e-05	1.18304e-05
1:Antistreptavidin IgG2 HC	244	M244+Oxidation	+Oxidation	1:D241-R247 = 834.4269m(M244+Oxidation)	DTLMISR	0.0192162	0.0192162	0.0192162	0.0192908	0.0192908	0.0192908	0.0157381	0.0157381	0.0157381	0.0191363	0.0191363	0.0191363
1:Antistreptavidin IgG2 HC	244	M244(M244I)[ATG] (1 base change)	Sequence Variant (1 base change)	1:D241-R247 = 834.4269m(M244I)	DTLMISR	0.000130623	0.000130623	0.000130623	0.000130396	0.000130396	0.000130396	7.42296e-05	7.42296e-05	7.42296e-05	8.49911e-05	8.49911e-05	8.49911e-05
1:Antistreptavidin IgG2 HC	259	S259(S259R)[AGC] (1 base change)	Sequence Variant (1 base change)	1:T248-S259 = 1304.6170m(S259R)	TPEVTCVVVDVS	0.000215417	0.000215417	0.000215417	0.000147822	0.000147822	0.000147822	0.00010252	0.00010252	0.00010252	7.05767e-05	7.05767e-05	7.05767e-05
1:Antistreptavidin IgG2 HC	262	D262+C-term clip	C-term Clip	1:T248-D262 = 1685.7454m[nonspecific]	TPEVTCVVVDVSHED	0.00545553	0.00545553	0.00545553	0.00285179	0.00285179	0.00285179	0.00387173	0.00387173	0.00387173	0.00256765	0.00256765	0.00256765
1:Antistreptavidin IgG2 HC	268	N268(N268K)[AAC] (1 base change)	Sequence Variant (1 base change)	1:T248-N268 = 2400.0791m(N268K)	TPEVTCVVVDVSHEDPEVQFN	0.000575176	0.000575176	0.000575176	0.00039557	0.00039557	0.00039557	0.000978416	0.000978416	0.000978416	0.000669972	0.000669972	0.000669972
1:Antistreptavidin IgG2 HC	269	W269+Double Oxidation	+Double Oxidation	1:T248-K280 = 3797.7519m(W269+Double Oxidation)	TPEVTCVVVDVSHEDPEVQFNWYVDGVEVHNAK	0.000595825	0.000595825	0.000595825	0.000605243	0.000605243	0.000605243	0.000623709	0.000623709	0.000623709	0.00153896	0.00153896	0.00153896
1:Antistreptavidin IgG2 HC	280	~K280+Glycation	+Glycation	1:T248-R284 = 4280.0484m(~K280+Glycation)	TPEVTCVVVDVSHEDPEVQFNWYVDGVEVHNAKTKPR	0.00699623	0.00699623	0.00699623	0.0023098	0.0023098	0.0023098	0.00209039	0.00209039	0.00209039	0.00143427	0.00143427	0.00143427
1:Antistreptavidin IgG2 HC	289	N289+A1G0	N-Glycan	1:E285-R293 = 1156.5149m(N289+A1G0)	EEQFNSTFR	0.00295756	0.00295756	0.00295756	0.00313741	0.00313741	0.00313741	0.00372823	0.00372823	0.00372823	0.0045607	0.0045607	0.0045607
1:Antistreptavidin IgG2 HC	289	N289+A1G0F	N-Glycan	1:E285-R293 = 1156.5149m(N289+A1G0F)	EEQFNSTFR	0.0120665	0.0120665	0.0120665	0.0130861	0.0130861	0.0130861	0.00470337	0.00470337	0.00470337	0.00537807	0.00537807	0.00537807
1:Antistreptavidin IgG2 HC	289	N289+A1G0M4	N-Glycan	1:E285-R293 = 1156.5149m(N289+A1G0M4)	EEQFNSTFR	0.000474892	0.000474892	0.000474892	0.000481855	0.000481855	0.000481855	0.0008174	0.0008174	0.0008174	0.000792053	0.000792053	0.000792053
1:Antistreptavidin IgG2 HC	289	N289+A1G0M5	N-Glycan	1:E285-R293 = 1156.5149m(N289+A1G0M5)	EEQFNSTFR	0.00115357	0.00115357	0.00115357	0.001016	0.001016	0.001016	0.00120376	0.00120376	0.00120376	0.00119965	0.00119965	0.00119965
1:Antistreptavidin IgG2 HC	289	N289+A1G0M5F	N-Glycan	1:E285-R293 = 1156.5149m(N289+A1G0M5F)	EEQFNSTFR	0.00103882	0.00103882	0.00103882	0.000997197	0.000997197	0.000997197	0.000968504	0.000968504	0.000968504	0.000980936	0.000980936	0.000980936
1:Antistreptavidin IgG2 HC	289	N289+A1G1	N-Glycan	1:E285-R293 = 1156.5149m(N289+A1G1)	EEQFNSTFR	0.00248645	0.00248645	0.00248645	0.00248989	0.00248989	0.00248989	0.00215014	0.00215014	0.00215014	0.0022893	0.0022893	0.0022893
1:Antistreptavidin IgG2 HC	289	N289+A1G1F	N-Glycan	1:E285-R293 = 1156.5149m(N289+A1G1F)	EEQFNSTFR	0.0349022	0.0349022	0.0349022	0.0361182	0.0361182	0.0361182	0.0358738	0.0358738	0.0358738	0.0362743	0.0362743	0.0362743
1:Antistreptavidin IgG2 HC	289	N289+A1G1M4	N-Glycan	1:E285-R293 = 1156.5149m(N289+A1G1M4)	EEQFNSTFR	0.00234792	0.00234792	0.00234792	0.00242399	0.00242399	0.00242399	0.00206419	0.00206419	0.00206419	0.00202402	0.00202402	0.00202402
1:Antistreptavidin IgG2 HC	289	N289+A1G1M4F	N-Glycan	1:E285-R293 = 1156.5149m(N289+A1G1M4F)	EEQFNSTFR	0.00941197	0.00941197	0.00941197	0.0090007	0.0090007	0.0090007	0.00941805	0.00941805	0.00941805	0.00975862	0.00975862	0.00975862
1:Antistreptavidin IgG2 HC	289	N289+A1G1M5	N-Glycan	1:E285-R293 = 1156.5149m(N289+A1G1M5)	EEQFNSTFR	0.00688375	0.00688375	0.00688375	0.00583251	0.00583251	0.00583251	0.00718978	0.00718978	0.00718978	0.00721583	0.00721583	0.00721583
1:Antistreptavidin IgG2 HC	289	N289+A1G1M5F	N-Glycan	1:E285-R293 = 1156.5149m(N289+A1G1M5F)	EEQFNSTFR	0.00870237	0.00870237	0.00870237	0.00774284	0.00774284	0.00774284	0.00904273	0.00904273	0.00904273	0.00916667	0.00916667	0.00916667
1:Antistreptavidin IgG2 HC	289	N289+A1S1	N-Glycan	1:E285-R293 = 1156.5149m(N289+A1S1)	EEQFNSTFR	0.000263253	0.000263253	0.000263253	0.000307694	0.000307694	0.000307694	0.00036126	0.00036126	0.00036126	0.000353534	0.000353534	0.000353534
1:Antistreptavidin IgG2 HC	289	N289+A1S1F	N-Glycan	1:E285-R293 = 1156.5149m(N289+A1S1F)	EEQFNSTFR	0.00677949	0.00677949	0.00677949	0.00757209	0.00757209	0.00757209	0.00758383	0.00758383	0.00758383	0.00748817	0.00748817	0.00748817
1:Antistreptavidin IgG2 HC	289	N289+A1S1M4	N-Glycan	1:E285-R293 = 1156.5149m(N289+A1S1M4)	EEQFNSTFR	0.000770242	0.000770242	0.000770242	0.000577711	0.000577711	0.000577711	0.00106614	0.00106614	0.00106614	0.00110759	0.00110759	0.00110759
1:Antistreptavidin IgG2 HC	289	N289+A1S1M4F	N-Glycan	1:E285-R293 = 1156.5149m(N289+A1S1M4F)	EEQFNSTFR	0.00486655	0.00486655	0.00486655	0.00429861	0.00429861	0.00429861	0.0074423	0.0074423	0.0074423	0.00782548	0.00782548	0.00782548
1:Antistreptavidin IgG2 HC	289	N289+A1S1M5	N-Glycan	1:E285-R293 = 1156.5149m(N289+A1S1M5)	EEQFNSTFR	0.00158507	0.00158507	0.00158507	0.00134799	0.00134799	0.00134799	0.00213662	0.00213662	0.00213662	0.00205901	0.00205901	0.00205901
1:Antistreptavidin IgG2 HC	289	N289+A1S1M5F	N-Glycan	1:E285-R293 = 1156.5149m(N289+A1S1M5F)	EEQFNSTFR	0.00300996	0.00300996	0.00300996	0.00264263	0.00264263	0.00264263	0.0045276	0.0045276	0.0045276	0.00442492	0.00442492	0.00442492
1:Antistreptavidin IgG2 HC	289	N289+A2G0	N-Glycan	1:E285-R293 = 1156.5149m(N289+A2G0)	EEQFNSTFR	0.0147192	0.0147192	0.0147192	0.014855	0.014855	0.014855	0.010801	0.010801	0.010801	0.0109466	0.0109466	0.0109466
1:Antistreptavidin IgG2 HC	289	N289+A2G0F	N-Glycan	1:E285-R293 = 1156.5149m(N289+A2G0F)	EEQFNSTFR	0.408936	0.408936	0.408936	0.419168	0.419168	0.419168	0.373842	0.373842	0.373842	0.372127	0.372127	0.372127
1:Antistreptavidin IgG2 HC	289	N289+A2G1	N-Glycan	1:E285-R293 = 1156.5149m(N289+A2G1)	EEQFNSTFR	0.0083291	0.0083291	0.0083291	0.00835229	0.00835229	0.00835229	0.00654435	0.00654435	0.00654435	0.00642267	0.00642267	0.00642267
1:Antistreptavidin IgG2 HC	289	N289+A2G1F	N-Glycan	1:E285-R293 = 1156.5149m(N289+A2G1F)	EEQFNSTFR	0.324943	0.324943	0.324943	0.318571	0.318571	0.318571	0.330549	0.330549	0.330549	0.33247	0.33247	0.33247
1:Antistreptavidin IgG2 HC	289	N289+A2G2	N-Glycan	1:E285-R293 = 1156.5149m(N289+A2G2)	EEQFNSTFR	0.00105877	0.00105877	0.00105877	0.000939367	0.000939367	0.000939367	0.000845689	0.000845689	0.000845689	0.000857085	0.000857085	0.000857085
1:Antistreptavidin IgG2 HC	289	N289+A2G2F	N-Glycan	1:E285-R293 = 1156.5149m(N289+A2G2F)	EEQFNSTFR	0.0499108	0.0499108	0.0499108	0.0509508	0.0509508	0.0509508	0.0623319	0.0623319	0.0623319	0.0598794	0.0598794	0.0598794
1:Antistreptavidin IgG2 HC	289	N289+A2S1G0F	N-Glycan	1:E285-R293 = 1156.5149m(N289+A2S1G0F)	EEQFNSTFR	0.00150419	0.00150419	0.00150419	0.00139511	0.00139511	0.00139511	0.00205662	0.00205662	0.00205662	0.0020678	0.0020678	0.0020678
1:Antistreptavidin IgG2 HC	289	N289+A2S1G1F	N-Glycan	1:E285-R293 = 1156.5149m(N289+A2S1G1F)	EEQFNSTFR	0.00206071	0.00206071	0.00206071	0.00165971	0.00165971	0.00165971	0.003177	0.003177	0.003177	0.00315631	0.00315631	0.00315631
1:Antistreptavidin IgG2 HC	289	N289+A2S2F	N-Glycan	1:E285-R293 = 1156.5149m(N289+A2S2F)	EEQFNSTFR	0.000350037	0.000350037	0.000350037	0.000289486	0.000289486	0.000289486	0.000980756	0.000980756	0.000980756	0.000996661	0.000996661	0.000996661
1:Antistreptavidin IgG2 HC	289	N289+A3G1F	N-Glycan	1:E285-R293 = 1156.5149m(N289+A3G1F)	EEQFNSTFR	0.000928834	0.000928834	0.000928834	0.000666832	0.000666832	0.000666832	0.00108083	0.00108083	0.00108083	0.0010622	0.0010622	0.0010622
1:Antistreptavidin IgG2 HC	289	N289+A3G2F	N-Glycan	1:E285-R293 = 1156.5149m(N289+A3G2F)	EEQFNSTFR	0.000329674	0.000329674	0.000329674	0.00024695	0.00024695	0.00024695	0.000597467	0.000597467	0.000597467	0.000625844	0.000625844	0.000625844
1:Antistreptavidin IgG2 HC	289	N289+Deamidation	+Deamidation	1:E285-R293 = 1156.5149m(N289+Deamidation)	EEQFNSTFR	0.000773581	0.000773581	0.000773581	0.000920493	0.000920493	0.000920493	0.000333864	0.000333864	0.000333864	0.00037237	0.00037237	0.00037237
1:Antistreptavidin IgG2 HC	289	N289+Gn	N-Glycan	1:E285-R293 = 1156.5149m(N289+Gn)	EEQFNSTFR	0.000415367	0.000415367	0.000415367	0.000354723	0.000354723	0.000354723	0.000213734	0.000213734	0.000213734	0.000199984	0.000199984	0.000199984
1:Antistreptavidin IgG2 HC	289	N289+M5	N-Glycan	1:E285-R293 = 1156.5149m(N289+M5)	EEQFNSTFR	0.0434184	0.0434184	0.0434184	0.0377038	0.0377038	0.0377038	0.0641422	0.0641422	0.0641422	0.065234	0.065234	0.065234
1:Antistreptavidin IgG2 HC	289	N289+M6	N-Glycan	1:E285-R293 = 1156.5149m(N289+M6)	EEQFNSTFR	0.0126177	0.0126177	0.0126177	0.0131342	0.0131342	0.0131342	0.0156962	0.0156962	0.0156962	0.0151293	0.0151293	0.0151293
1:Antistreptavidin IgG2 HC	289	N289+M7	N-Glycan	1:E285-R293 = 1156.5149m(N289+M7)	EEQFNSTFR	0.00732421	0.00732421	0.00732421	0.00525847	0.00525847	0.00525847	0.00802794	0.00802794	0.00802794	0.00738058	0.00738058	0.00738058
1:Antistreptavidin IgG2 HC	289	N289+M8	N-Glycan	1:E285-R293 = 1156.5149m(N289+M8)	EEQFNSTFR	0.00663375	0.00663375	0.00663375	0.00567207	0.00567207	0.00567207	0.00918693	0.00918693	0.00918693	0.00872235	0.00872235	0.00872235
1:Antistreptavidin IgG2 HC	289	N289+M9	N-Glycan	1:E285-R293 = 1156.5149m(N289+M9)	EEQFNSTFR	0.000490081	0.000490081	0.000490081	0.000352212	0.000352212	0.000352212	0.0010706	0.0010706	0.0010706	0.000984668	0.000984668	0.000984668
1:Antistreptavidin IgG2 HC	289	N289+Unglycosylated	N-Glycan	1:E285-R293 = 1156.5149m(N289+Unglycosylated)	EEQFNSTFR	0.0170725	0.0170725	0.0170725	0.0207296	0.0207296	0.0207296	0.00627955	0.00627955	0.00627955	0.00657987	0.00657987	0.00657987
1:Antistreptavidin IgG2 HC	294	V294(V294M)[GTG] (1 base change)	Sequence Variant (1 base change)	1:V294-K309 = 1792.9836m(V294M)	VVSVLTVVHQDWLNGK	6.5635e-05	6.5635e-05	6.5635e-05	6.99855e-05	6.99855e-05	6.99855e-05	4.87261e-05	4.87261e-05	4.87261e-05	6.00802e-05	6.00802e-05	6.00802e-05
1:Antistreptavidin IgG2 HC	296	S296(S296N)[AGC] (1 base change)	Sequence Variant (1 base change)	1:V294-K309 = 1792.9836m(S296N)	VVSVLTVVHQDWLNGK	0.000165457	0.000165457	0.000165457	0.000211624	0.000211624	0.000211624	0.000136231	0.000136231	0.000136231	0.000171262	0.000171262	0.000171262
1:Antistreptavidin IgG2 HC	297	V297(V297A)[GTC] (1 base change)	Sequence Variant (1 base change)	1:V294-K309 = 1792.9836m(V297A)	VVSVLTVVHQDWLNGK	4.50191e-05	4.50191e-05	4.50191e-05	6.64241e-05	6.64241e-05	6.64241e-05	3.62877e-05	3.62877e-05	3.62877e-05	5.06613e-05	5.06613e-05	5.06613e-05
1:Antistreptavidin IgG2 HC	297	V297(V297I)[GTC] (1 base change)	Sequence Variant (1 base change)	1:V294-K309 = 1792.9836m(V297I)	VVSVLTVVHQDWLNGK	0.000298751	0.000298751	0.000298751	0.000291793	0.000291793	0.000291793	0.000248651	0.000248651	0.000248651	0.00029691	0.00029691	0.00029691
1:Antistreptavidin IgG2 HC	300	V300(V300I)[GTT] (1 base change)	Sequence Variant (1 base change)	1:V294-K309 = 1792.9836m(V300I)	VVSVLTVVHQDWLNGK	0.000154402	0.000154402	0.000154402	0.000149834	0.000149834	0.000149834	0.000112603	0.000112603	0.000112603	0.000134927	0.000134927	0.000134927
1:Antistreptavidin IgG2 HC	302	H302+Double Oxidation	+Double Oxidation	1:V294-K309 = 1792.9836m(H302+Double Oxidation)	VVSVLTVVHQDWLNGK	3.9298e-05	3.9298e-05	3.9298e-05	5.22017e-05	5.22017e-05	5.22017e-05	6.45759e-05	6.45759e-05	6.45759e-05	8.15942e-05	8.15942e-05	8.15942e-05
1:Antistreptavidin IgG2 HC	302	H302(H302Q)[CAC] (1 base change)	Sequence Variant (1 base change)	1:V294-K309 = 1792.9836m(H302Q)	VVSVLTVVHQDWLNGK	1.40872e-05	1.40872e-05	1.40872e-05	1.18196e-05	1.18196e-05	1.18196e-05	2.99693e-05	2.99693e-05	2.99693e-05	3.12081e-05	3.12081e-05	3.12081e-05
1:Antistreptavidin IgG2 HC	304	D304+H2O loss	+H2O loss	1:V294-K309 = 1792.9836m(D304+H2O loss)	VVSVLTVVHQDWLNGK	0.00119224	0.00119224	0.00119224	0.00123232	0.00123232	0.00123232	0.00170684	0.00170684	0.00170684	0.00221406	0.00221406	0.00221406
1:Antistreptavidin IgG2 HC	305	W305+Double Oxidation	+Double Oxidation	1:V294-K309 = 1792.9836m(W305+Double Oxidation)	VVSVLTVVHQDWLNGK	0.000572507	0.000572507	0.000572507	0.00170118	0.00170118	0.00170118	0.000573339	0.000573339	0.000573339	0.0023811	0.0023811	0.0023811
1:Antistreptavidin IgG2 HC	305	W305+Oxidation	+Oxidation	1:V294-K309 = 1792.9836m(W305+Oxidation)	VVSVLTVVHQDWLNGK	0.00020041	0.00020041	0.00020041	0.000275782	0.000275782	0.000275782	0.000185556	0.000185556	0.000185556	0.000249134	0.000249134	0.000249134
1:Antistreptavidin IgG2 HC	307	N307+Deamidation	+Deamidation	1:V294-K309 = 1792.9836m(N307+Deamidation)	VVSVLTVVHQDWLNGK	0.00443754	0.00443754	0.00443754	0.00463358	0.00463358	0.00463358	0.00471544	0.00471544	0.00471544	0.00498402	0.00498402	0.00498402
1:Antistreptavidin IgG2 HC	307	N307+NH3 loss	+NH3 loss	1:V294-K309 = 1792.9836m(N307+NH3 loss)	VVSVLTVVHQDWLNGK	0.0287131	0.0287131	0.0287131	0.0244668	0.0244668	0.0244668	0.0292568	0.0292568	0.0292568	0.030275	0.030275	0.030275
1:Antistreptavidin IgG2 HC	309	K309+Glycation	+Glycation	1:V294-K312 = 2213.1845m(K309+Glycation)	VVSVLTVVHQDWLNGKEYK	0.000642054	0.000642054	0.000642054	0.000941027	0.000941027	0.000941027	0.000501289	0.000501289	0.000501289	0.000680933	0.000680933	0.000680933
1:Antistreptavidin IgG2 HC	318	K318+Glycation	+Glycation	1:C313-K326 = 1540.8283m(K318+Glycation)	CKVSNKGLPAPIEK	8.2459e-06	8.2459e-06	8.2459e-06	0.00021894	0.00021894	0.00021894	5.00242e-06	5.00242e-06	5.00242e-06	0.000291003	0.000291003	0.000291003
1:Antistreptavidin IgG2 HC	319	G319(G319S)[GGC] (1 base change)	Sequence Variant (1 base change)	1:G319-K326 = 823.48035m(G319S)	GLPAPIEK	7.60742e-05	7.60742e-05	7.60742e-05	7.93598e-05	7.93598e-05	7.93598e-05	4.32775e-05	4.32775e-05	4.32775e-05	4.77777e-05	4.77777e-05	4.77777e-05
1:Antistreptavidin IgG2 HC	321	P321+Hydroxylation	+Hydroxylation	1:G319-K326 = 823.4804m(P321+Hydroxylation)	GLPAPIEK	0.00247673	0.00247673	0.00247673	0.00213586	0.00213586	0.00213586	0.00144789	0.00144789	0.00144789	0.00162483	0.00162483	0.00162483
1:Antistreptavidin IgG2 HC	352	K352+Glycation	+Glycation	1:E348-K362 = 1779.8747m(K352+Glycation)	EEMTKNQVSLTCLVK	0.000484038	0.000484038	0.000484038	0.000351319	0.000351319	0.000351319	0.000341116	0.000341116	0.000341116	0.000288863	0.000288863	0.000288863
1:Antistreptavidin IgG2 HC	353	~N353+NH3 loss	+NH3 loss	1:N353-K362 = 1161.6064m(~N353+NH3 loss)	NQVSLTCLVK	0.00116687	0.00116687	0.00116687	0.000903381	0.000903381	0.000903381	0.000638683	0.000638683	0.000638683	0.000594607	0.000594607	0.000594607
1:Antistreptavidin IgG2 HC	353	N353(N353K)[AAC] (1 base change)	Sequence Variant (1 base change)	1:N353-K362 = 1161.6064m(N353K)	NQVSLTCLVK	2.8276e-05	2.8276e-05	2.8276e-05	3.49324e-05	3.49324e-05	3.49324e-05	1.64632e-05	1.64632e-05	1.64632e-05	4.24261e-05	4.24261e-05	4.24261e-05
1:Antistreptavidin IgG2 HC	359	C359(C359Y)[TGC] (1 base change)	Sequence Variant (1 base change)	1:N353-K362 = 1161.6064m(C359Y)	NQVSLTCLVK	0.000153519	0.000153519	0.000153519	0.000126936	0.000126936	0.000126936	0.00010022	0.00010022	0.00010022	9.23537e-05	9.23537e-05	9.23537e-05
1:Antistreptavidin IgG2 HC	362	K362+Hydroxylation	+Hydroxylation	1:N353-K362 = 1161.6064m(K362+Hydroxylation)	NQVSLTCLVK	5.92353e-05	5.92353e-05	5.92353e-05	5.95168e-05	5.95168e-05	5.95168e-05	3.43295e-05	3.43295e-05	3.43295e-05	4.0505e-05	4.0505e-05	4.0505e-05
1:Antistreptavidin IgG2 HC	362	K362+Glycation	+Glycation	1:N353-K384 = 3686.7199m(K362+Glycation)	NQVSLTCLVKGFYPSDIAVEWESNGQPENNYK	9.86544e-05	9.86544e-05	9.86544e-05	8.24001e-05	8.24001e-05	8.24001e-05	0.000127366	0.000127366	0.000127366	0.000107612	0.000107612	0.000107612
1:Antistreptavidin IgG2 HC	368	D368(D368N)[GAC] (1 base change)	Sequence Variant (1 base change)	1:G363-K384 = 2543.1241m(D368N)	GFYPSDIAVEWESNGQPENNYK	7.33122e-05	7.33122e-05	7.33122e-05	3.17028e-05	3.17028e-05	3.17028e-05	5.21563e-05	5.21563e-05	5.21563e-05	5.83162e-05	5.83162e-05	5.83162e-05
1:Antistreptavidin IgG2 HC	370	A370(A370T)[GCC] (1 base change)	Sequence Variant (1 base change)	1:G363-K384 = 2543.1241m(A370T)	GFYPSDIAVEWESNGQPENNYK	5.77208e-05	5.77208e-05	5.77208e-05	7.00813e-05	7.00813e-05	7.00813e-05	4.73059e-05	4.73059e-05	4.73059e-05	5.2195e-05	5.2195e-05	5.2195e-05
1:Antistreptavidin IgG2 HC	375	S375(S375N)[AGC] (1 base change)	Sequence Variant (1 base change)	1:G363-K384 = 2543.1241m(S375N)	GFYPSDIAVEWESNGQPENNYK	0.000182709	0.000182709	0.000182709	0.000149464	0.000149464	0.000149464	0.000132992	0.000132992	0.000132992	0.00013394	0.00013394	0.00013394
1:Antistreptavidin IgG2 HC	376	~N376+Deamidation	+Deamidation	1:G363-K384 = 2543.1241m(~N376+Deamidation)	GFYPSDIAVEWESNGQPENNYK	0.0161233	0.0161233	0.0161233	0.0130844	0.0130844	0.0130844	0.00995623	0.00995623	0.00995623	0.00987457	0.00987457	0.00987457
1:Antistreptavidin IgG2 HC	376	~N376+NH3 loss	+NH3 loss	1:G363-K384 = 2543.1241m(~N376+NH3 loss)	GFYPSDIAVEWESNGQPENNYK	0.0218699	0.0218699	0.0218699	0.0169263	0.0169263	0.0169263	0.0118303	0.0118303	0.0118303	0.0110696	0.0110696	0.0110696
1:Antistreptavidin IgG2 HC	382	~N382+NH3 loss	+NH3 loss	1:G363-K384 = 2543.1241m(~N382+NH3 loss)	GFYPSDIAVEWESNGQPENNYK	0.00555772	0.00555772	0.00555772	0.00421714	0.00421714	0.00421714	0.00276606	0.00276606	0.00276606	0.00262498	0.00262498	0.00262498
1:Antistreptavidin IgG2 HC	384	K384+Glycation	+Glycation	1:G363-K401 = 4430.0001m(K384+Glycation)	GFYPSDIAVEWESNGQPENNYKTTPPMLDSDGSFFLYSK	0.000226215	0.000226215	0.000226215	0.000263899	0.000263899	0.000263899	0.000511128	0.000511128	0.000511128	0.000419123	0.000419123	0.000419123
1:Antistreptavidin IgG2 HC	389	M389(M389I)[ATG] (1 base change)	Sequence Variant (1 base change)	1:T385-K401 = 1904.8866m(M389I)	TTPPMLDSDGSFFLYSK	0.000119845	0.000119845	0.000119845	0.000142927	0.000142927	0.000142927	8.57504e-05	8.57504e-05	8.57504e-05	8.68674e-05	8.68674e-05	8.68674e-05
1:Antistreptavidin IgG2 HC	393	D393+H2O loss	+H2O loss	1:T385-K401 = 1904.8866m(D393+H2O loss)	TTPPMLDSDGSFFLYSK	0.00573529	0.00573529	0.00573529	0.00571764	0.00571764	0.00571764	0.004217	0.004217	0.004217	0.00398185	0.00398185	0.00398185
1:Antistreptavidin IgG2 HC	400	S400(S400N)[AGC] (1 base change)	Sequence Variant (1 base change)	1:T385-K401 = 1904.8866m(S400N)	TTPPMLDSDGSFFLYSK	0.000180683	0.000180683	0.000180683	0.000169123	0.000169123	0.000169123	0.000128521	0.000128521	0.000128521	0.000123475	0.000123475	0.000123475
1:Antistreptavidin IgG2 HC	420	M420+Oxidation	+Oxidation	1:W409-K431 = 2801.2439m(M420+Oxidation)	WQQGNVFSCSVMHEALHNHYTQK	0.00914373	0.00914373	0.00914373	0.00729622	0.00729622	0.00729622	0.00659559	0.00659559	0.00659559	0.00794155	0.00794155	0.00794155
1:Antistreptavidin IgG2 HC	420	M420(M420I)[ATG] (1 base change)	Sequence Variant (1 base change)	1:W409-K431 = 2801.2439m(M420I)	WQQGNVFSCSVMHEALHNHYTQK	0.000332212	0.000332212	0.000332212	0.000319375	0.000319375	0.000319375	0.000300021	0.000300021	0.000300021	0.000357679	0.000357679	0.000357679
1:Antistreptavidin IgG2 HC	426	N426+Deamidation	+Deamidation	1:W409-K431 = 2801.2439m(N426+Deamidation)	WQQGNVFSCSVMHEALHNHYTQK	0.00290695	0.00290695	0.00290695	0.00242676	0.00242676	0.00242676	0.0030632	0.0030632	0.0030632	0.002876	0.002876	0.002876
1:Antistreptavidin IgG2 HC	426	N426+NH3 loss	+NH3 loss	1:W409-K431 = 2801.2439m(N426+NH3 loss)	WQQGNVFSCSVMHEALHNHYTQK	0.0052611	0.0052611	0.0052611	0.00399882	0.00399882	0.00399882	0.00507206	0.00507206	0.00507206	0.00485283	0.00485283	0.00485283
1:Antistreptavidin IgG2 HC	436	S436(S436N)[TCT] (2 base change)	Sequence Variant (2 base change)	1:S432-G438 = 659.34901m(S436N)	SLSLSPG	0.00054523	0.00054523	0.00054523	0.000480842	0.000480842	0.000480842	0.000502856	0.000502856	0.000502856	0.000501879	0.000501879	0.000501879
1:Antistreptavidin IgG2 HC	438	G438-58.0054	Unknown Modification	1:S432-G438 = 659.34901m(G438-58.0054)	SLSLSPG	0.00118293	0.00118293	0.00118293	0.00146587	0.00146587	0.00146587	0.000858391	0.000858391	0.000858391	0.000828854	0.000828854	0.000828854
1:Antistreptavidin IgG2 HC	438	G438+Lys	+Lys	1:S432-G438 = 659.34901m(G438+Lys)	SLSLSPG	0.0291594	0.0291594	0.0291594	0.033654	0.033654	0.033654	0.017942	0.017942	0.017942	0.0182046	0.0182046	0.0182046
2:Antistreptavidin IgG2 LC	1	Q1+17.0265	N-Terminal Extension	2:Q1-R17 = 1676.8482m(Q1+17.0265)	QSVVTQPPSVSGAPGQR	0.014215	0.014215	0.014215	0.0113785	0.0113785	0.0113785	0.00901825	0.00901825	0.00901825	0.00920038	0.00920038	0.00920038
2:Antistreptavidin IgG2 LC	2	S2+N-term clip	N-term Clip	2:S2-R17 = 1565.8162m[nonspecific]	SVVTQPPSVSGAPGQR	0.00121521	0.00121521	0.00121521	0.000963374	0.000963374	0.000963374	0.000650667	0.000650667	0.000650667	0.000657827	0.000657827	0.000657827
2:Antistreptavidin IgG2 LC	5	~T5+GalNAc	O-Glycan	2:Q1-R17 = 1676.8482m(~T5+GalNAc)	QSVVTQPPSVSGAPGQR	0.000217149	0.000217149	0.000217149	0.00015139	0.00015139	0.00015139	0.000164936	0.000164936	0.000164936	0.00014968	0.00014968	0.00014968
2:Antistreptavidin IgG2 LC	14	P14+Hydroxylation	+Hydroxylation	2:Q1-R17 = 1676.8482m(P14+Hydroxylation)	QSVVTQPPSVSGAPGQR	0.00298962	0.00298962	0.00298962	0.00209422	0.00209422	0.00209422	0.00185342	0.00185342	0.00185342	0.00183155	0.00183155	0.00183155
2:Antistreptavidin IgG2 LC	17	R17(R17K)[AGG] (1 base change)	Sequence Variant (1 base change)	2:Q1-R17 = 1676.8482m(R17K)	QSVVTQPPSVSGAPGQR	0.000250825	0.000250825	0.000250825	0.000199323	0.000199323	0.000199323	0.000148039	0.000148039	0.000148039	0.000151348	0.000151348	0.000151348
2:Antistreptavidin IgG2 LC	24	G24(G24R)[GGG] (1 base change)	Sequence Variant (1 base change)	2:V18-G24 = 737.3266m(G24R)	VTISCTG	0.000204107	0.000204107	0.000204107	0.000252295	0.000252295	0.000252295	2.28444e-05	2.28444e-05	2.28444e-05	2.92616e-05	2.92616e-05	2.92616e-05
2:Antistreptavidin IgG2 LC	28	N28(N28K)[AAC] (1 base change)	Sequence Variant (1 base change)	2:V18-N28 = 1112.4656m(N28K)	VTISCTGSSSN	0.000119221	0.000119221	0.000119221	0.000135541	0.000135541	0.000135541	1.73445e-05	1.73445e-05	1.73445e-05	2.35418e-05	2.35418e-05	2.35418e-05
2:Antistreptavidin IgG2 LC	30	G30(G30R)[GGG] (1 base change)	Sequence Variant (1 base change)	2:V18-G30 = 1282.5711m(G30R)	VTISCTGSSSNIG	0.000120702	0.000120702	0.000120702	0.000155806	0.000155806	0.000155806	3.28968e-05	3.28968e-05	3.28968e-05	3.82004e-05	3.82004e-05	3.82004e-05
2:Antistreptavidin IgG2 LC	32	G32+N-term clip	N-term Clip	2:G32-K47 = 1858.9002m[nonspecific]	GYDVHWYQQLPGTAPK	0.000231734	0.000231734	0.000231734	0.000224566	0.000224566	0.000224566	4.75432e-05	4.75432e-05	4.75432e-05	3.95524e-05	3.95524e-05	3.95524e-05
2:Antistreptavidin IgG2 LC	36	H36(H36Q)[CAC] (1 base change)	Sequence Variant (1 base change)	2:V18-K47 = 3194.4979m(H36Q)	VTISCTGSSSNIGAGYDVHWYQQLPGTAPK	0.000111452	0.000111452	0.000111452	9.89527e-05	9.89527e-05	9.89527e-05	8.59656e-05	8.59656e-05	8.59656e-05	9.37049e-05	9.37049e-05	9.37049e-05
2:Antistreptavidin IgG2 LC	37	W37+Double Oxidation	+Double Oxidation	2:V18-K47 = 3194.4979m(W37+Double Oxidation)	VTISCTGSSSNIGAGYDVHWYQQLPGTAPK	0.000988673	0.000988673	0.000988673	0.0056604	0.0056604	0.0056604	0.000721014	0.000721014	0.000721014	0.0042928	0.0042928	0.0042928
2:Antistreptavidin IgG2 LC	37	W37+Oxidation	+Oxidation	2:V18-K47 = 3194.4979m(W37+Oxidation)	VTISCTGSSSNIGAGYDVHWYQQLPGTAPK	0.000636233	0.000636233	0.000636233	0.000572712	0.000572712	0.000572712	0.000530933	0.000530933	0.000530933	0.000614844	0.000614844	0.000614844
2:Antistreptavidin IgG2 LC	48	L48(L48F)[CTC] (1 base change)	Sequence Variant (1 base change)	2:L48-R63 = 1756.9220m(L48F)	LLIYGNSNRPSGVPDR	0.000141692	0.000141692	0.000141692	0.000135557	0.000135557	0.000135557	0.000125953	0.000125953	0.000125953	0.000151123	0.000151123	0.000151123
2:Antistreptavidin IgG2 LC	52	G52(G52D)[GGT] (1 base change)	Sequence Variant (1 base change)	2:L48-R63 = 1756.9220m(G52D)	LLIYGNSNRPSGVPDR	5.62568e-05	5.62568e-05	5.62568e-05	2.97005e-05	2.97005e-05	2.97005e-05	3.19332e-05	3.19332e-05	3.19332e-05	3.61948e-05	3.61948e-05	3.61948e-05
2:Antistreptavidin IgG2 LC	53	N53(N53K)[AAC] (1 base change)	Sequence Variant (1 base change)	2:L48-N53 = 691.39048m(N53K)	LLIYGN	4.60256e-05	4.60256e-05	4.60256e-05	5.2014e-05	5.2014e-05	5.2014e-05	2.05868e-05	2.05868e-05	2.05868e-05	2.87807e-05	2.87807e-05	2.87807e-05
2:Antistreptavidin IgG2 LC	53	N53+Deamidation	+Deamidation	2:L48-R63 = 1756.9220m(N53+Deamidation)	LLIYGNSNRPSGVPDR	0.00599458	0.00599458	0.00599458	0.00430879	0.00430879	0.00430879	0.0046366	0.0046366	0.0046366	0.00530884	0.00530884	0.00530884
2:Antistreptavidin IgG2 LC	54	~S54+GalNAc-3SG	O-Glycan	2:L48-R63 = 1756.9220m(~S54+GalNAc-3SG)	LLIYGNSNRPSGVPDR	0.000263469	0.000263469	0.000263469	0.0001507	0.0001507	0.0001507	0.000321896	0.000321896	0.000321896	0.000325415	0.000325415	0.000325415
2:Antistreptavidin IgG2 LC	59	G59(G59E)[GGG] (1 base change)	Sequence Variant (1 base change)	2:L48-R63 = 1756.9220m(G59E)	LLIYGNSNRPSGVPDR	4.72075e-05	4.72075e-05	4.72075e-05	4.11869e-05	4.11869e-05	4.11869e-05	3.98298e-05	3.98298e-05	3.98298e-05	4.64268e-05	4.64268e-05	4.64268e-05
2:Antistreptavidin IgG2 LC	83	E83(E83K)[GAG] (1 base change)	Sequence Variant (1 base change)	2:S69-E83 = 1404.7096m(E83K)	SGTSASLAITGLQAE	0.000442343	0.000442343	0.000442343	0.000570545	0.000570545	0.000570545	9.06273e-05	9.06273e-05	9.06273e-05	0.000103081	0.000103081	0.000103081
2:Antistreptavidin IgG2 LC	98	S98+N-term clip	N-term Clip	2:S98-K108 = 1128.5815m[nonspecific]	SGLYVFGTGTK	0.00412665	0.00412665	0.00412665	0.00992232	0.00992232	0.00992232	0.000810849	0.000810849	0.000810849	0.00118818	0.00118818	0.00118818
2:Antistreptavidin IgG2 LC	100	L100+N-term clip	N-term Clip	2:L100-K108 = 984.5280m[nonspecific]	LYVFGTGTK	0.000100744	0.000100744	0.000100744	0.000205282	0.000205282	0.000205282	1.33095e-05	1.33095e-05	1.33095e-05	2.04913e-05	2.04913e-05	2.04913e-05
2:Antistreptavidin IgG2 LC	108	K108+Glycation	+Glycation	2:S69-K116 = 5035.3808m(K108+Glycation)	SGTSASLAITGLQAEDEADYYCQSYDSSLSGLYVFGTGTKVTVLGQPK	0.00208886	0.00208886	0.00208886	0.00220166	0.00220166	0.00220166	0.0012888	0.0012888	0.0012888	0.00125499	0.00125499	0.00125499
2:Antistreptavidin IgG2 LC	109	V109(V109I)[GTC] (1 base change)	Sequence Variant (1 base change)	2:V109-K116 = 840.5069m(V109I)	VTVLGQPK	0.000116669	0.000116669	0.000116669	0.000137317	0.000137317	0.000137317	7.1741e-05	7.1741e-05	7.1741e-05	6.57472e-05	6.57472e-05	6.57472e-05
2:Antistreptavidin IgG2 LC	111	V111(V111A)[GTC] (1 base change)	Sequence Variant (1 base change)	2:V109-K116 = 840.5069m(V111A)	VTVLGQPK	3.41871e-05	3.41871e-05	3.41871e-05	3.35392e-05	3.35392e-05	3.35392e-05	1.69709e-05	1.69709e-05	1.69709e-05	1.78503e-05	1.78503e-05	1.78503e-05
2:Antistreptavidin IgG2 LC	111	V111(V111I)[GTC] (1 base change)	Sequence Variant (1 base change)	2:V109-K116 = 840.5069m(V111I)	VTVLGQPK	0.000227506	0.000227506	0.000227506	0.000263729	0.000263729	0.000263729	0.00014629	0.00014629	0.00014629	0.000133739	0.000133739	0.000133739
2:Antistreptavidin IgG2 LC	114	Q114+Deamidation	+Deamidation	2:V109-K116 = 840.5069m(Q114+Deamidation)	VTVLGQPK	6.58581e-05	6.58581e-05	6.58581e-05	8.869e-05	8.869e-05	8.869e-05	2.60434e-05	2.60434e-05	2.60434e-05	2.80005e-05	2.80005e-05	2.80005e-05
2:Antistreptavidin IgG2 LC	144	D144+H2O loss	+H2O loss	2:A136-K155 = 2211.1286m(D144+H2O loss)	ATLVCLISDFYPGAVTVAWK	9.10226e-05	9.10226e-05	9.10226e-05	7.14854e-05	7.14854e-05	7.14854e-05	4.39415e-05	4.39415e-05	4.39415e-05	4.19115e-05	4.19115e-05	4.19115e-05
2:Antistreptavidin IgG2 LC	144	D144(D144G)[GAC] (1 base change)	Sequence Variant (1 base change)	2:A136-K155 = 2211.1286m(D144G)	ATLVCLISDFYPGAVTVAWK	0.00368747	0.00368747	0.00368747	0.00246421	0.00246421	0.00246421	0.00199325	0.00199325	0.00199325	0.00145648	0.00145648	0.00145648
2:Antistreptavidin IgG2 LC	154	W154+Double Oxidation	+Double Oxidation	2:A136-K155 = 2211.1286m(W154+Double Oxidation)	ATLVCLISDFYPGAVTVAWK	0.00404214	0.00404214	0.00404214	0.00774045	0.00774045	0.00774045	0.00245115	0.00245115	0.00245115	0.0161785	0.0161785	0.0161785
2:Antistreptavidin IgG2 LC	154	W154+Oxidation	+Oxidation	2:A136-K155 = 2211.1286m(W154+Oxidation)	ATLVCLISDFYPGAVTVAWK	0.000618645	0.000618645	0.000618645	0.000585718	0.000585718	0.000585718	0.000467999	0.000467999	0.000467999	0.000662204	0.000662204	0.000662204
2:Antistreptavidin IgG2 LC	154	W154+Oxidation to kynurenine	+Oxidation to kynurenine	2:A136-K155 = 2211.1286m(W154+Oxidation to kynurenine)	ATLVCLISDFYPGAVTVAWK	0.000515766	0.000515766	0.000515766	0.000471011	0.000471011	0.000471011	0.000205729	0.000205729	0.000205729	0.000797538	0.000797538	0.000797538
2:Antistreptavidin IgG2 LC	155	K155+Glycation	+Glycation	2:A136-K162 = 2895.4728m(K155+Glycation)	ATLVCLISDFYPGAVTVAWKADSSPVK	0.0105566	0.0105566	0.0105566	0.0101837	0.0101837	0.0101837	0.0131932	0.0131932	0.0131932	0.0131425	0.0131425	0.0131425
2:Antistreptavidin IgG2 LC	162	K162+Glycation	+Glycation	2:A156-K172 = 1673.8472m(K162+Glycation)	ADSSPVKAGVETTTPSK	0.00105152	0.00105152	0.00105152	0.000806681	0.000806681	0.000806681	0.000472808	0.000472808	0.000472808	0.000307847	0.000307847	0.000307847
2:Antistreptavidin IgG2 LC	164	G164(G164E)[GGA] (1 base change)	Sequence Variant (1 base change)	2:A163-K172 = 989.5029m(G164E)	AGVETTTPSK	0.000107363	0.000107363	0.000107363	6.87157e-05	6.87157e-05	6.87157e-05	6.23423e-05	6.23423e-05	6.23423e-05	4.54398e-05	4.54398e-05	4.54398e-05
2:Antistreptavidin IgG2 LC	165	V165(V165M)[GTG] (1 base change)	Sequence Variant (1 base change)	2:A163-K172 = 989.5029m(V165M)	AGVETTTPSK	5.80068e-05	5.80068e-05	5.80068e-05	4.74185e-05	4.74185e-05	4.74185e-05	3.29054e-05	3.29054e-05	3.29054e-05	3.14616e-05	3.14616e-05	3.14616e-05
2:Antistreptavidin IgG2 LC	177	K177+Glycation	+Glycation	2:Q173-K192 = 2314.1230m(K177+Glycation)	QSNNKYAASSYLSLTPEQWK	0.00101881	0.00101881	0.00101881	0.00105245	0.00105245	0.00105245	0.000592723	0.000592723	0.000592723	0.000722422	0.000722422	0.000722422
2:Antistreptavidin IgG2 LC	185	S185(S185R)[AGC] (1 base change)	Sequence Variant (1 base change)	2:Y178-S185 = 860.3916m(S185R)	YAASSYLS	0.000351084	0.000351084	0.000351084	0.000354183	0.000354183	0.000354183	0.000111251	0.000111251	0.000111251	0.000153642	0.000153642	0.000153642
2:Antistreptavidin IgG2 LC	185	S185(S185N)[AGC] (1 base change)	Sequence Variant (1 base change)	2:Y178-K192 = 1742.8516m(S185N)	YAASSYLSLTPEQWK	0.000608149	0.000608149	0.000608149	0.000604151	0.000604151	0.000604151	0.000380978	0.000380978	0.000380978	0.000422285	0.000422285	0.000422285
2:Antistreptavidin IgG2 LC	191	W191+Double Oxidation	+Double Oxidation	2:Y178-K192 = 1742.8516m(W191+Double Oxidation)	YAASSYLSLTPEQWK	0.000396942	0.000396942	0.000396942	0.0026879	0.0026879	0.0026879	0.000423474	0.000423474	0.000423474	0.00251429	0.00251429	0.00251429
2:Antistreptavidin IgG2 LC	191	W191+Oxidation	+Oxidation	2:Y178-K192 = 1742.8516m(W191+Oxidation)	YAASSYLSLTPEQWK	0.000381264	0.000381264	0.000381264	0.000573851	0.000573851	0.000573851	0.00025825	0.00025825	0.00025825	0.000426233	0.000426233	0.000426233
2:Antistreptavidin IgG2 LC	192	K192+Glycation	+Glycation	2:Y178-R195 = 2123.0436m(K192+Glycation)	YAASSYLSLTPEQWKSHR	0.00179244	0.00179244	0.00179244	0.00158871	0.00158871	0.00158871	0.000404487	0.000404487	0.000404487	0.000478307	0.000478307	0.000478307
2:Antistreptavidin IgG2 LC	196	S196(S196N)[AGC] (1 base change)	Sequence Variant (1 base change)	2:S196-K210 = 1711.7359m(S196N)	SYSCQVTHEGSTVEK	5.37561e-05	5.37561e-05	5.37561e-05	4.24508e-05	4.24508e-05	4.24508e-05	4.7153e-05	4.7153e-05	4.7153e-05	8.4958e-05	8.4958e-05	8.4958e-05
2:Antistreptavidin IgG2 LC	198	S198(S198N)[AGC] (1 base change)	Sequence Variant (1 base change)	2:S196-K210 = 1711.7359m(S198N)	SYSCQVTHEGSTVEK	0.000438813	0.000438813	0.000438813	0.00047527	0.00047527	0.00047527	0.00040626	0.00040626	0.00040626	0.000542465	0.000542465	0.000542465
2:Antistreptavidin IgG2 LC	201	V201(V201I)[GTC] (1 base change)	Sequence Variant (1 base change)	2:S196-K210 = 1711.7359m(V201I)	SYSCQVTHEGSTVEK	7.76216e-05	7.76216e-05	7.76216e-05	8.94058e-05	8.94058e-05	8.94058e-05	7.38578e-05	7.38578e-05	7.38578e-05	0.000105717	0.000105717	0.000105717
2:Antistreptavidin IgG2 LC	201	V201(V201M)[GTC] (2 base change)	Sequence Variant (2 base change)	2:S196-K210 = 1711.7359m(V201M)	SYSCQVTHEGSTVEK	4.81383e-05	4.81383e-05	4.81383e-05	6.08402e-05	6.08402e-05	6.08402e-05	5.87019e-05	5.87019e-05	5.87019e-05	8.52728e-05	8.52728e-05	8.52728e-05
2:Antistreptavidin IgG2 LC	203	H203(H203Q)[CAT] (1 base change)	Sequence Variant (1 base change)	2:S196-K210 = 1711.7359m(H203Q)	SYSCQVTHEGSTVEK	2.05503e-05	2.05503e-05	2.05503e-05	1.8976e-05	1.8976e-05	1.8976e-05	5.92001e-05	5.92001e-05	5.92001e-05	6.49961e-05	6.49961e-05	6.49961e-05
2:Antistreptavidin IgG2 LC	205	G205(G205D)[GGG] (2 base change)	Sequence Variant (2 base change)	2:S196-K210 = 1711.7359m(G205D)	SYSCQVTHEGSTVEK	5.55725e-05	5.55725e-05	5.55725e-05	8.23721e-05	8.23721e-05	8.23721e-05	7.71349e-05	7.71349e-05	7.71349e-05	0.0001067	0.0001067	0.0001067
2:Antistreptavidin IgG2 LC	206	S206(S206N)[AGC] (1 base change)	Sequence Variant (1 base change)	2:S196-K210 = 1711.7359m(S206N)	SYSCQVTHEGSTVEK	0.000164237	0.000164237	0.000164237	0.000217857	0.000217857	0.000217857	0.000166622	0.000166622	0.000166622	0.000232536	0.000232536	0.000232536
2:Antistreptavidin IgG2 LC	210	K210+Glycation	+Glycation	2:S196-S218 = 2558.0789m(K210+Glycation)	SYSCQVTHEGSTVEKTVAPTECS	0.000231963	0.000231963	0.000231963	0.000294211	0.000294211	0.000294211	0.000616915	0.000616915	0.000616915	0.000785104	0.000785104	0.000785104
Reference variant abundance
Protein	Residue #	Modification	Category	Modified Peptides	Peptide Sequence	Abundance as Peak Area
1:Antistreptavidin IgG2 HC	1	Q1+17.0265	N-Terminal Extension	1:Q1-R39 = 4113.0266m(Q1+17.0265)	QLQLQESGPGLVKPSGTLSLTCAVSGGSISSGNWWSWVR	0.981751	0.981751	0.981751	0.980578	0.980578	0.980578	0.992996	0.992996	0.992996	0.993271	0.993271	0.993271
1:Antistreptavidin IgG2 HC	13	K13+Glycation	+Glycation	1:Q1-R39 = 4113.0266m(K13+Glycation)	QLQLQESGPGLVKPSGTLSLTCAVSGGSISSGNWWSWVR	0.999836	0.999836	0.999836	0.999835	0.999835	0.999835	0.99983	0.99983	0.99983	0.999768	0.999768	0.999768
1:Antistreptavidin IgG2 HC	30	S30+C-term clip	C-term Clip	1:Q1-S30 = 2954.4907m[nonspecific]	QLQLQESGPGLVKPSGTLSLTCAVSGGSIS	0.9997	0.9997	0.9997	0.999853	0.999853	0.999853	0.999899	0.999899	0.999899	0.999938	0.999938	0.999938
1:Antistreptavidin IgG2 HC	31	S31+N-term clip	N-term Clip	1:S31-R39 = 1176.5465m[nonspecific]	SGNWWSWVR	0.998974	0.998974	0.998974	0.998283	0.998283	0.998283	0.999697	0.999697	0.999697	0.999657	0.999657	0.999657
1:Antistreptavidin IgG2 HC	34	~W34+Double Oxidation	+Double Oxidation	1:Q1-R39 = 4113.0266m(~W34+Double Oxidation)	QLQLQESGPGLVKPSGTLSLTCAVSGGSISSGNWWSWVR	0.998332	0.998332	0.998332	0.99777	0.99777	0.99777	0.99788	0.99788	0.99788	0.99705	0.99705	0.99705
1:Antistreptavidin IgG2 HC	34	~W34+Oxidation to kynurenine	+Oxidation to kynurenine	1:Q1-R39 = 4113.0266m(~W34+Oxidation to kynurenine)	QLQLQESGPGLVKPSGTLSLTCAVSGGSISSGNWWSWVR	0.998332	0.998332	0.998332	0.99777	0.99777	0.99777	0.99788	0.99788	0.99788	0.99705	0.99705	0.99705
1:Antistreptavidin IgG2 HC	37	~W37+Double Oxidation	+Double Oxidation	1:Q1-R39 = 4113.0266m(~W37+Double Oxidation)	QLQLQESGPGLVKPSGTLSLTCAVSGGSISSGNWWSWVR	0.999046	0.999046	0.999046	0.998539	0.998539	0.998539	0.998984	0.998984	0.998984	0.997793	0.997793	0.997793
1:Antistreptavidin IgG2 HC	44	K44+Glycation	+Glycation	1:Q40-K65 = 2809.4035m(K44+Glycation)	QPPGKGLEWIGEISHSGTTNYNPSLK	0.999666	0.999666	0.999666	0.99964	0.99964	0.99964	0.999771	0.999771	0.999771	0.999751	0.999751	0.999751
1:Antistreptavidin IgG2 HC	48	W48+Double Oxidation	+Double Oxidation	1:G45-K65 = 2302.1230m(W48+Double Oxidation)	GLEWIGEISHSGTTNYNPSLK	0.999443	0.999443	0.999443	0.998803	0.998803	0.998803	0.99954	0.99954	0.99954	0.999095	0.999095	0.999095
1:Antistreptavidin IgG2 HC	48	W48+Oxidation	+Oxidation	1:G45-K65 = 2302.1230m(W48+Oxidation)	GLEWIGEISHSGTTNYNPSLK	0.999443	0.999443	0.999443	0.998803	0.998803	0.998803	0.99954	0.99954	0.99954	0.999095	0.999095	0.999095
1:Antistreptavidin IgG2 HC	55	S55+C-term clip	C-term Clip	1:G45-S55 = 1226.5932m[nonspecific]	GLEWIGEISHS	0.99996	0.99996	0.99996	0.999941	0.999941	0.999941	0.999997	0.999997	0.999997	0.999974	0.999974	0.999974
1:Antistreptavidin IgG2 HC	56	G56(G56R)[GGG] (1 base change)	Sequence Variant (1 base change)	1:G45-G56 = 1283.6146m(G56R)	GLEWIGEISHSG	0.999952	0.999952	0.999952	0.999935	0.999935	0.999935	0.999981	0.999981	0.999981	0.999976	0.999976	0.999976
1:Antistreptavidin IgG2 HC	56	G56+N-term clip	N-term Clip	1:G56-K65 = 1093.5404m[nonspecific]	GTTNYNPSLK	0.999905	0.999905	0.999905	0.999928	0.999928	0.999928	0.999951	0.999951	0.999951	0.999946	0.999946	0.999946
1:Antistreptavidin IgG2 HC	59	N59(N59K)[AAC] (1 base change)	Sequence Variant (1 base change)	1:G45-N59 = 1599.7529m(N59K)	GLEWIGEISHSGTTN	0.999922	0.999922	0.999922	0.999897	0.999897	0.999897	0.999968	0.999968	0.999968	0.999962	0.999962	0.999962
1:Antistreptavidin IgG2 HC	65	K65+Glycation	+Glycation	1:G45-R67 = 2545.2561m(K65+Glycation)	GLEWIGEISHSGTTNYNPSLKSR	0.999673	0.999673	0.999673	0.999643	0.999643	0.999643	0.999833	0.999833	0.999833	0.999806	0.999806	0.999806
1:Antistreptavidin IgG2 HC	67	R67(R67Q)[CGA] (1 base change)	Sequence Variant (1 base change)	1:S66-K74 = 961.5193m(R67Q)	SRVTISGDK	0.999925	0.999925	0.999925	0.999935	0.999935	0.999935	0.999803	0.999803	0.999803	0.999685	0.999685	0.999685
1:Antistreptavidin IgG2 HC	68	V68(V68I)[GTC] (1 base change)	Sequence Variant (1 base change)	1:V68-K74 = 718.38612m(V68I)	VTISGDK	0.999902	0.999902	0.999902	0.999897	0.999897	0.999897	0.99981	0.99981	0.99981	0.999704	0.999704	0.999704
1:Antistreptavidin IgG2 HC	107	~T107+GalNAc-3SG	O-Glycan	1:N99-K117 = 2059.9851m(~T107+GalNAc-3SG)	NFDYWGQGTLVTVSSASTK	0.999565	0.999565	0.999565	0.999968	0.999968	0.999968	0.999864	0.999864	0.999864	0.99996	0.99996	0.99996
1:Antistreptavidin IgG2 HC	107	T107+N-term clip	N-term Clip	1:T107-K117 = 1092.6027m[nonspecific]	TLVTVSSASTK	0.999958	0.999958	0.999958	0.999962	0.999962	0.999962	0.999988	0.999988	0.999988	0.999992	0.999992	0.999992
1:Antistreptavidin IgG2 HC	117	K117+Hydroxylation	+Hydroxylation	1:N99-K117 = 2059.9851m(K117+Hydroxylation)	NFDYWGQGTLVTVSSASTK	0.952227	0.952227	0.952227	0.960142	0.960142	0.960142	0.95044	0.95044	0.95044	0.954093	0.954093	0.954093
1:Antistreptavidin IgG2 HC	120	~S120+GalNAc-3SG	O-Glycan	1:G118-R129 = 1287.6282m(~S120+GalNAc-3SG)	GPSVFPLAPCSR	0.999929	0.999929	0.999929	0.99992	0.99992	0.99992	0.999845	0.999845	0.999845	0.99987	0.99987	0.99987
1:Antistreptavidin IgG2 HC	121	V121(V121I)[GTC] (1 base change)	Sequence Variant (1 base change)	1:G118-R129 = 1287.6282m(V121I)	GPSVFPLAPCSR	0.99991	0.99991	0.99991	0.999904	0.999904	0.999904	0.999952	0.999952	0.999952	0.999949	0.999949	0.999949
1:Antistreptavidin IgG2 HC	122	F122(F122Y)[TTC] (1 base change)	Sequence Variant (1 base change)	1:G118-R129 = 1287.6282m(F122Y)	GPSVFPLAPCSR	0.999918	0.999918	0.999918	0.999921	0.999921	0.999921	0.999947	0.999947	0.999947	0.99995	0.99995	0.99995
1:Antistreptavidin IgG2 HC	127	C127+C-term clip	C-term Clip	1:G118-C127 = 1044.4950m[nonspecific]	GPSVFPLAPC	0.999857	0.999857	0.999857	0.999918	0.999918	0.999918	0.99995	0.99995	0.99995	0.999971	0.999971	0.999971
1:Antistreptavidin IgG2 HC	127	C127(C127Y)[TGC] (1 base change)	Sequence Variant (1 base change)	1:G118-R129 = 1287.6282m(C127Y)	GPSVFPLAPCSR	0.999971	0.999971	0.999971	0.999951	0.999951	0.999951	0.999989	0.999989	0.999989	0.999979	0.999979	0.999979
1:Antistreptavidin IgG2 HC	129	R129(R129K)[AGG] (1 base change)	Sequence Variant (1 base change)	1:G118-R129 = 1287.6282m(R129K)	GPSVFPLAPCSR	0.999931	0.999931	0.999931	0.999932	0.999932	0.999932	0.999961	0.999961	0.999961	0.999959	0.999959	0.999959
1:Antistreptavidin IgG2 HC	131	T131+N-term clip	N-term Clip	1:T131-K143 = 1336.6544m[nonspecific]	TSESTAALGCLVK	0.999908	0.999908	0.999908	0.999925	0.999925	0.999925	0.99994	0.99994	0.99994	0.99995	0.99995	0.99995
1:Antistreptavidin IgG2 HC	132	S132+N-term clip	N-term Clip	1:S132-K143 = 1235.6068m[nonspecific]	SESTAALGCLVK	0.999641	0.999641	0.999641	0.999618	0.999618	0.999618	0.999726	0.999726	0.999726	0.999707	0.999707	0.999707
1:Antistreptavidin IgG2 HC	134	S134(S134N)[AGC] (1 base change)	Sequence Variant (1 base change)	1:S130-K143 = 1423.6865m(S134N)	STSESTAALGCLVK	0.999712	0.999712	0.999712	0.999746	0.999746	0.999746	0.999823	0.999823	0.999823	0.999801	0.999801	0.999801
1:Antistreptavidin IgG2 HC	134	S134+N-term clip	N-term Clip	1:S134-K143 = 1019.5321m[nonspecific]	STAALGCLVK	0.999476	0.999476	0.999476	0.999544	0.999544	0.999544	0.999796	0.999796	0.999796	0.999771	0.999771	0.999771
1:Antistreptavidin IgG2 HC	135	T135+N-term clip	N-term Clip	1:T135-K143 = 932.5001m[nonspecific]	TAALGCLVK	0.999858	0.999858	0.999858	0.999895	0.999895	0.999895	0.99995	0.99995	0.99995	0.999952	0.999952	0.999952
1:Antistreptavidin IgG2 HC	136	A136(A136T)[GCG] (1 base change)	Sequence Variant (1 base change)	1:S130-K143 = 1423.6865m(A136T)	STSESTAALGCLVK	0.999967	0.999967	0.999967	0.999966	0.999966	0.999966	0.999976	0.999976	0.999976	0.999971	0.999971	0.999971
1:Antistreptavidin IgG2 HC	140	C140(C140Y)[TGC] (1 base change)	Sequence Variant (1 base change)	1:S130-K143 = 1423.6865m(C140Y)	STSESTAALGCLVK	0.999814	0.999814	0.999814	0.999776	0.999776	0.999776	0.99987	0.99987	0.99987	0.999864	0.999864	0.999864
1:Antistreptavidin IgG2 HC	142	V142(V142I)[GTC] (1 base change)	Sequence Variant (1 base change)	1:S130-K143 = 1423.6865m(V142I)	STSESTAALGCLVK	0.999956	0.999956	0.999956	0.999951	0.999951	0.999951	0.999968	0.999968	0.999968	0.999963	0.999963	0.999963
1:Antistreptavidin IgG2 HC	154	~W154+Double Oxidation	+Double Oxidation	1:D144-K206 = 6763.2341m(~W154+Double Oxidation)	DYFPEPVTVSWNSGALTSGVHTFPAVLQSSGLYSLSSVVTVPSSNFGTQTYTCNVDHKPSNTK	0.984956	0.984956	0.984956	0.981576	0.981576	0.981576	0.985137	0.985137	0.985137	0.983406	0.983406	0.983406
1:Antistreptavidin IgG2 HC	154	W154+Oxidation	+Oxidation	1:D144-K206 = 6763.2341m(W154+Oxidation)	DYFPEPVTVSWNSGALTSGVHTFPAVLQSSGLYSLSSVVTVPSSNFGTQTYTCNVDHKPSNTK	0.984956	0.984956	0.984956	0.981576	0.981576	0.981576	0.985137	0.985137	0.985137	0.983406	0.983406	0.983406
1:Antistreptavidin IgG2 HC	155	N155(N155K)[AAC] (1 base change)	Sequence Variant (1 base change)	1:D144-N155 = 1452.6561m(N155K)	DYFPEPVTVSWN	0.999836	0.999836	0.999836	0.999775	0.999775	0.999775	0.999954	0.999954	0.999954	0.999933	0.999933	0.999933
1:Antistreptavidin IgG2 HC	158	A158+N-term clip	N-term Clip	1:A158-K206 = 5184.5350m[nonspecific]	ALTSGVHTFPAVLQSSGLYSLSSVVTVPSSNFGTQTYTCNVDHKPSNTK	0.999974	0.999974	0.999974	0.99996	0.99996	0.99996	0.999958	0.999958	0.999958	0.999924	0.999924	0.999924
1:Antistreptavidin IgG2 HC	160	T160+C-term clip	C-term Clip	1:D144-T160 = 1881.8785m[nonspecific]	DYFPEPVTVSWNSGALT	0.999978	0.999978	0.999978	0.999958	0.999958	0.999958	0.999985	0.999985	0.999985	0.999971	0.999971	0.999971
1:Antistreptavidin IgG2 HC	161	S161+N-term clip	N-term Clip	1:S161-K206 = 4899.3661m[nonspecific]	SGVHTFPAVLQSSGLYSLSSVVTVPSSNFGTQTYTCNVDHKPSNTK	0.999885	0.999885	0.999885	0.99985	0.99985	0.99985	0.999929	0.999929	0.999929	0.999892	0.999892	0.999892
1:Antistreptavidin IgG2 HC	191	T191+N-term clip	N-term Clip	1:T191-K206 = 1893.8527m[nonspecific]	TQTYTCNVDHKPSNTK	0.999701	0.999701	0.999701	0.999502	0.999502	0.999502	0.999954	0.999954	0.999954	0.999919	0.999919	0.999919
1:Antistreptavidin IgG2 HC	199	D199+H2O loss	+H2O loss	1:D144-K206 = 6763.2341m(D199+H2O loss)	DYFPEPVTVSWNSGALTSGVHTFPAVLQSSGLYSLSSVVTVPSSNFGTQTYTCNVDHKPSNTK	0.993567	0.993567	0.993567	0.99441	0.99441	0.99441	0.994528	0.994528	0.994528	0.995041	0.995041	0.995041
1:Antistreptavidin IgG2 HC	238	K238+Glycation	+Glycation	1:C215-K240 = 2911.3305m(K238+Glycation)	CCVECPPCPAPPVAGPSVFLFPPKPK	0.999057	0.999057	0.999057	0.99904	0.99904	0.99904	0.999053	0.999053	0.999053	0.998885	0.998885	0.998885
1:Antistreptavidin IgG2 HC	240	K240+Glycation	+Glycation	1:P239-R247 = 1059.5747m(K240+Glycation)	PKDTLMISR	0.998498	0.998498	0.998498	0.999431	0.999431	0.999431	0.99934	0.99934	0.99934	0.999859	0.999859	0.999859
1:Antistreptavidin IgG2 HC	241	D241+H2O loss	Artifact-Detection	1:D241-R247 = 834.42694m(D241+H2O loss)	DTLMISR	0.995803	0.995803	0.995803	0.995687	0.995687	0.995687	0.980142	0.980142	0.980142	0.978424	0.978424	0.978424
1:Antistreptavidin IgG2 HC	244	M244+Double Oxidation	+Double Oxidation	1:D241-R247 = 834.4269m(M244+Double Oxidation)	DTLMISR	0.980621	0.980621	0.980621	0.980547	0.980547	0.980547	0.984181	0.984181	0.984181	0.980767	0.980767	0.980767
1:Antistreptavidin IgG2 HC	244	M244+Oxidation	+Oxidation	1:D241-R247 = 834.4269m(M244+Oxidation)	DTLMISR	0.980621	0.980621	0.980621	0.980547	0.980547	0.980547	0.984181	0.984181	0.984181	0.980767	0.980767	0.980767
1:Antistreptavidin IgG2 HC	244	M244(M244I)[ATG] (1 base change)	Sequence Variant (1 base change)	1:D241-R247 = 834.4269m(M244I)	DTLMISR	0.980621	0.980621	0.980621	0.980547	0.980547	0.980547	0.984181	0.984181	0.984181	0.980767	0.980767	0.980767
1:Antistreptavidin IgG2 HC	259	S259(S259R)[AGC] (1 base change)	Sequence Variant (1 base change)	1:T248-S259 = 1304.6170m(S259R)	TPEVTCVVVDVS	0.999785	0.999785	0.999785	0.999852	0.999852	0.999852	0.999897	0.999897	0.999897	0.999929	0.999929	0.999929
1:Antistreptavidin IgG2 HC	262	D262+C-term clip	C-term Clip	1:T248-D262 = 1685.7454m[nonspecific]	TPEVTCVVVDVSHED	0.994544	0.994544	0.994544	0.997148	0.997148	0.997148	0.996128	0.996128	0.996128	0.997432	0.997432	0.997432
1:Antistreptavidin IgG2 HC	268	N268(N268K)[AAC] (1 base change)	Sequence Variant (1 base change)	1:T248-N268 = 2400.0791m(N268K)	TPEVTCVVVDVSHEDPEVQFN	0.999425	0.999425	0.999425	0.999604	0.999604	0.999604	0.999022	0.999022	0.999022	0.99933	0.99933	0.99933
1:Antistreptavidin IgG2 HC	269	W269+Double Oxidation	+Double Oxidation	1:T248-K280 = 3797.7519m(W269+Double Oxidation)	TPEVTCVVVDVSHEDPEVQFNWYVDGVEVHNAK	0.999404	0.999404	0.999404	0.999395	0.999395	0.999395	0.999376	0.999376	0.999376	0.998461	0.998461	0.998461
1:Antistreptavidin IgG2 HC	280	~K280+Glycation	+Glycation	1:T248-R284 = 4280.0484m(~K280+Glycation)	TPEVTCVVVDVSHEDPEVQFNWYVDGVEVHNAKTKPR	0.993004	0.993004	0.993004	0.99769	0.99769	0.99769	0.99791	0.99791	0.99791	0.998566	0.998566	0.998566
1:Antistreptavidin IgG2 HC	289	N289+A1G0	N-Glycan	1:E285-R293 = 1156.5149m(N289+A1G0)	EEQFNSTFR	0.408936	0.408936	0.408936	0.419168	0.419168	0.419168	0.373842	0.373842	0.373842	0.372127	0.372127	0.372127
1:Antistreptavidin IgG2 HC	289	N289+A1G0F	N-Glycan	1:E285-R293 = 1156.5149m(N289+A1G0F)	EEQFNSTFR	0.408936	0.408936	0.408936	0.419168	0.419168	0.419168	0.373842	0.373842	0.373842	0.372127	0.372127	0.372127
1:Antistreptavidin IgG2 HC	289	N289+A1G0M4	N-Glycan	1:E285-R293 = 1156.5149m(N289+A1G0M4)	EEQFNSTFR	0.408936	0.408936	0.408936	0.419168	0.419168	0.419168	0.373842	0.373842	0.373842	0.372127	0.372127	0.372127
1:Antistreptavidin IgG2 HC	289	N289+A1G0M5	N-Glycan	1:E285-R293 = 1156.5149m(N289+A1G0M5)	EEQFNSTFR	0.408936	0.408936	0.408936	0.419168	0.419168	0.419168	0.373842	0.373842	0.373842	0.372127	0.372127	0.372127
1:Antistreptavidin IgG2 HC	289	N289+A1G0M5F	N-Glycan	1:E285-R293 = 1156.5149m(N289+A1G0M5F)	EEQFNSTFR	0.408936	0.408936	0.408936	0.419168	0.419168	0.419168	0.373842	0.373842	0.373842	0.372127	0.372127	0.372127
1:Antistreptavidin IgG2 HC	289	N289+A1G1	N-Glycan	1:E285-R293 = 1156.5149m(N289+A1G1)	EEQFNSTFR	0.408936	0.408936	0.408936	0.419168	0.419168	0.419168	0.373842	0.373842	0.373842	0.372127	0.372127	0.372127
1:Antistreptavidin IgG2 HC	289	N289+A1G1F	N-Glycan	1:E285-R293 = 1156.5149m(N289+A1G1F)	EEQFNSTFR	0.408936	0.408936	0.408936	0.419168	0.419168	0.419168	0.373842	0.373842	0.373842	0.372127	0.372127	0.372127
1:Antistreptavidin IgG2 HC	289	N289+A1G1M4	N-Glycan	1:E285-R293 = 1156.5149m(N289+A1G1M4)	EEQFNSTFR	0.408936	0.408936	0.408936	0.419168	0.419168	0.419168	0.373842	0.373842	0.373842	0.372127	0.372127	0.372127
1:Antistreptavidin IgG2 HC	289	N289+A1G1M4F	N-Glycan	1:E285-R293 = 1156.5149m(N289+A1G1M4F)	EEQFNSTFR	0.408936	0.408936	0.408936	0.419168	0.419168	0.419168	0.373842	0.373842	0.373842	0.372127	0.372127	0.372127
1:Antistreptavidin IgG2 HC	289	N289+A1G1M5	N-Glycan	1:E285-R293 = 1156.5149m(N289+A1G1M5)	EEQFNSTFR	0.408936	0.408936	0.408936	0.419168	0.419168	0.419168	0.373842	0.373842	0.373842	0.372127	0.372127	0.372127
1:Antistreptavidin IgG2 HC	289	N289+A1G1M5F	N-Glycan	1:E285-R293 = 1156.5149m(N289+A1G1M5F)	EEQFNSTFR	0.408936	0.408936	0.408936	0.419168	0.419168	0.419168	0.373842	0.373842	0.373842	0.372127	0.372127	0.372127
1:Antistreptavidin IgG2 HC	289	N289+A1S1	N-Glycan	1:E285-R293 = 1156.5149m(N289+A1S1)	EEQFNSTFR	0.408936	0.408936	0.408936	0.419168	0.419168	0.419168	0.373842	0.373842	0.373842	0.372127	0.372127	0.372127
1:Antistreptavidin IgG2 HC	289	N289+A1S1F	N-Glycan	1:E285-R293 = 1156.5149m(N289+A1S1F)	EEQFNSTFR	0.408936	0.408936	0.408936	0.419168	0.419168	0.419168	0.373842	0.373842	0.373842	0.372127	0.372127	0.372127
1:Antistreptavidin IgG2 HC	289	N289+A1S1M4	N-Glycan	1:E285-R293 = 1156.5149m(N289+A1S1M4)	EEQFNSTFR	0.408936	0.408936	0.408936	0.419168	0.419168	0.419168	0.373842	0.373842	0.373842	0.372127	0.372127	0.372127
1:Antistreptavidin IgG2 HC	289	N289+A1S1M4F	N-Glycan	1:E285-R293 = 1156.5149m(N289+A1S1M4F)	EEQFNSTFR	0.408936	0.408936	0.408936	0.419168	0.419168	0.419168	0.373842	0.373842	0.373842	0.372127	0.372127	0.372127
1:Antistreptavidin IgG2 HC	289	N289+A1S1M5	N-Glycan	1:E285-R293 = 1156.5149m(N289+A1S1M5)	EEQFNSTFR	0.408936	0.408936	0.408936	0.419168	0.419168	0.419168	0.373842	0.373842	0.373842	0.372127	0.372127	0.372127
1:Antistreptavidin IgG2 HC	289	N289+A1S1M5F	N-Glycan	1:E285-R293 = 1156.5149m(N289+A1S1M5F)	EEQFNSTFR	0.408936	0.408936	0.408936	0.419168	0.419168	0.419168	0.373842	0.373842	0.373842	0.372127	0.372127	0.372127
1:Antistreptavidin IgG2 HC	289	N289+A2G0	N-Glycan	1:E285-R293 = 1156.5149m(N289+A2G0)	EEQFNSTFR	0.408936	0.408936	0.408936	0.419168	0.419168	0.419168	0.373842	0.373842	0.373842	0.372127	0.372127	0.372127
1:Antistreptavidin IgG2 HC	289	N289+A2G0F	N-Glycan	1:E285-R293 = 1156.5149m(N289+A2G0F)	EEQFNSTFR	0.408936	0.408936	0.408936	0.419168	0.419168	0.419168	0.373842	0.373842	0.373842	0.372127	0.372127	0.372127
1:Antistreptavidin IgG2 HC	289	N289+A2G1	N-Glycan	1:E285-R293 = 1156.5149m(N289+A2G1)	EEQFNSTFR	0.408936	0.408936	0.408936	0.419168	0.419168	0.419168	0.373842	0.373842	0.373842	0.372127	0.372127	0.372127
1:Antistreptavidin IgG2 HC	289	N289+A2G1F	N-Glycan	1:E285-R293 = 1156.5149m(N289+A2G1F)	EEQFNSTFR	0.408936	0.408936	0.408936	0.419168	0.419168	0.419168	0.373842	0.373842	0.373842	0.372127	0.372127	0.372127
1:Antistreptavidin IgG2 HC	289	N289+A2G2	N-Glycan	1:E285-R293 = 1156.5149m(N289+A2G2)	EEQFNSTFR	0.408936	0.408936	0.408936	0.419168	0.419168	0.419168	0.373842	0.373842	0.373842	0.372127	0.372127	0.372127
1:Antistreptavidin IgG2 HC	289	N289+A2G2F	N-Glycan	1:E285-R293 = 1156.5149m(N289+A2G2F)	EEQFNSTFR	0.408936	0.408936	0.408936	0.419168	0.419168	0.419168	0.373842	0.373842	0.373842	0.372127	0.372127	0.372127
1:Antistreptavidin IgG2 HC	289	N289+A2S1G0F	N-Glycan	1:E285-R293 = 1156.5149m(N289+A2S1G0F)	EEQFNSTFR	0.408936	0.408936	0.408936	0.419168	0.419168	0.419168	0.373842	0.373842	0.373842	0.372127	0.372127	0.372127
1:Antistreptavidin IgG2 HC	289	N289+A2S1G1F	N-Glycan	1:E285-R293 = 1156.5149m(N289+A2S1G1F)	EEQFNSTFR	0.408936	0.408936	0.408936	0.419168	0.419168	0.419168	0.373842	0.373842	0.373842	0.372127	0.372127	0.372127
1:Antistreptavidin IgG2 HC	289	N289+A2S2F	N-Glycan	1:E285-R293 = 1156.5149m(N289+A2S2F)	EEQFNSTFR	0.408936	0.408936	0.408936	0.419168	0.419168	0.419168	0.373842	0.373842	0.373842	0.372127	0.372127	0.372127
1:Antistreptavidin IgG2 HC	289	N289+A3G1F	N-Glycan	1:E285-R293 = 1156.5149m(N289+A3G1F)	EEQFNSTFR	0.408936	0.408936	0.408936	0.419168	0.419168	0.419168	0.373842	0.373842	0.373842	0.372127	0.372127	0.372127
1:Antistreptavidin IgG2 HC	289	N289+A3G2F	N-Glycan	1:E285-R293 = 1156.5149m(N289+A3G2F)	EEQFNSTFR	0.408936	0.408936	0.408936	0.419168	0.419168	0.419168	0.373842	0.373842	0.373842	0.372127	0.372127	0.372127
1:Antistreptavidin IgG2 HC	289	N289+Deamidation	+Deamidation	1:E285-R293 = 1156.5149m(N289+Deamidation)	EEQFNSTFR	0.408936	0.408936	0.408936	0.419168	0.419168	0.419168	0.373842	0.373842	0.373842	0.372127	0.372127	0.372127
1:Antistreptavidin IgG2 HC	289	N289+Gn	N-Glycan	1:E285-R293 = 1156.5149m(N289+Gn)	EEQFNSTFR	0.408936	0.408936	0.408936	0.419168	0.419168	0.419168	0.373842	0.373842	0.373842	0.372127	0.372127	0.372127
1:Antistreptavidin IgG2 HC	289	N289+M5	N-Glycan	1:E285-R293 = 1156.5149m(N289+M5)	EEQFNSTFR	0.408936	0.408936	0.408936	0.419168	0.419168	0.419168	0.373842	0.373842	0.373842	0.372127	0.372127	0.372127
1:Antistreptavidin IgG2 HC	289	N289+M6	N-Glycan	1:E285-R293 = 1156.5149m(N289+M6)	EEQFNSTFR	0.408936	0.408936	0.408936	0.419168	0.419168	0.419168	0.373842	0.373842	0.373842	0.372127	0.372127	0.372127
1:Antistreptavidin IgG2 HC	289	N289+M7	N-Glycan	1:E285-R293 = 1156.5149m(N289+M7)	EEQFNSTFR	0.408936	0.408936	0.408936	0.419168	0.419168	0.419168	0.373842	0.373842	0.373842	0.372127	0.372127	0.372127
1:Antistreptavidin IgG2 HC	289	N289+M8	N-Glycan	1:E285-R293 = 1156.5149m(N289+M8)	EEQFNSTFR	0.408936	0.408936	0.408936	0.419168	0.419168	0.419168	0.373842	0.373842	0.373842	0.372127	0.372127	0.372127
1:Antistreptavidin IgG2 HC	289	N289+M9	N-Glycan	1:E285-R293 = 1156.5149m(N289+M9)	EEQFNSTFR	0.408936	0.408936	0.408936	0.419168	0.419168	0.419168	0.373842	0.373842	0.373842	0.372127	0.372127	0.372127
1:Antistreptavidin IgG2 HC	289	N289+Unglycosylated	N-Glycan	1:E285-R293 = 1156.5149m(N289+Unglycosylated)	EEQFNSTFR	0.408936	0.408936	0.408936	0.419168	0.419168	0.419168	0.373842	0.373842	0.373842	0.372127	0.372127	0.372127
1:Antistreptavidin IgG2 HC	294	V294(V294M)[GTG] (1 base change)	Sequence Variant (1 base change)	1:V294-K309 = 1792.9836m(V294M)	VVSVLTVVHQDWLNGK	0.999934	0.999934	0.999934	0.99993	0.99993	0.99993	0.999951	0.999951	0.999951	0.99994	0.99994	0.99994
1:Antistreptavidin IgG2 HC	296	S296(S296N)[AGC] (1 base change)	Sequence Variant (1 base change)	1:V294-K309 = 1792.9836m(S296N)	VVSVLTVVHQDWLNGK	0.999835	0.999835	0.999835	0.999788	0.999788	0.999788	0.999864	0.999864	0.999864	0.999829	0.999829	0.999829
1:Antistreptavidin IgG2 HC	297	V297(V297A)[GTC] (1 base change)	Sequence Variant (1 base change)	1:V294-K309 = 1792.9836m(V297A)	VVSVLTVVHQDWLNGK	0.999656	0.999656	0.999656	0.999642	0.999642	0.999642	0.999715	0.999715	0.999715	0.999652	0.999652	0.999652
1:Antistreptavidin IgG2 HC	297	V297(V297I)[GTC] (1 base change)	Sequence Variant (1 base change)	1:V294-K309 = 1792.9836m(V297I)	VVSVLTVVHQDWLNGK	0.999656	0.999656	0.999656	0.999642	0.999642	0.999642	0.999715	0.999715	0.999715	0.999652	0.999652	0.999652
1:Antistreptavidin IgG2 HC	300	V300(V300I)[GTT] (1 base change)	Sequence Variant (1 base change)	1:V294-K309 = 1792.9836m(V300I)	VVSVLTVVHQDWLNGK	0.999846	0.999846	0.999846	0.99985	0.99985	0.99985	0.999887	0.999887	0.999887	0.999865	0.999865	0.999865
1:Antistreptavidin IgG2 HC	302	H302+Double Oxidation	+Double Oxidation	1:V294-K309 = 1792.9836m(H302+Double Oxidation)	VVSVLTVVHQDWLNGK	0.999947	0.999947	0.999947	0.999936	0.999936	0.999936	0.999905	0.999905	0.999905	0.999887	0.999887	0.999887
1:Antistreptavidin IgG2 HC	302	H302(H302Q)[CAC] (1 base change)	Sequence Variant (1 base change)	1:V294-K309 = 1792.9836m(H302Q)	VVSVLTVVHQDWLNGK	0.999947	0.999947	0.999947	0.999936	0.999936	0.999936	0.999905	0.999905	0.999905	0.999887	0.999887	0.999887
1:Antistreptavidin IgG2 HC	304	D304+H2O loss	+H2O loss	1:V294-K309 = 1792.9836m(D304+H2O loss)	VVSVLTVVHQDWLNGK	0.998808	0.998808	0.998808	0.998768	0.998768	0.998768	0.998293	0.998293	0.998293	0.997786	0.997786	0.997786
1:Antistreptavidin IgG2 HC	305	W305+Double Oxidation	+Double Oxidation	1:V294-K309 = 1792.9836m(W305+Double Oxidation)	VVSVLTVVHQDWLNGK	0.999227	0.999227	0.999227	0.998023	0.998023	0.998023	0.999241	0.999241	0.999241	0.99737	0.99737	0.99737
1:Antistreptavidin IgG2 HC	305	W305+Oxidation	+Oxidation	1:V294-K309 = 1792.9836m(W305+Oxidation)	VVSVLTVVHQDWLNGK	0.999227	0.999227	0.999227	0.998023	0.998023	0.998023	0.999241	0.999241	0.999241	0.99737	0.99737	0.99737
1:Antistreptavidin IgG2 HC	307	N307+Deamidation	+Deamidation	1:V294-K309 = 1792.9836m(N307+Deamidation)	VVSVLTVVHQDWLNGK	0.966849	0.966849	0.966849	0.9709	0.9709	0.9709	0.966028	0.966028	0.966028	0.964741	0.964741	0.964741
1:Antistreptavidin IgG2 HC	307	N307+NH3 loss	+NH3 loss	1:V294-K309 = 1792.9836m(N307+NH3 loss)	VVSVLTVVHQDWLNGK	0.966849	0.966849	0.966849	0.9709	0.9709	0.9709	0.966028	0.966028	0.966028	0.964741	0.964741	0.964741
1:Antistreptavidin IgG2 HC	309	K309+Glycation	+Glycation	1:V294-K312 = 2213.1845m(K309+Glycation)	VVSVLTVVHQDWLNGKEYK	0.999358	0.999358	0.999358	0.999059	0.999059	0.999059	0.999499	0.999499	0.999499	0.999319	0.999319	0.999319
1:Antistreptavidin IgG2 HC	318	K318+Glycation	+Glycation	1:C313-K326 = 1540.8283m(K318+Glycation)	CKVSNKGLPAPIEK	0.999992	0.999992	0.999992	0.999781	0.999781	0.999781	0.999995	0.999995	0.999995	0.999709	0.999709	0.999709
1:Antistreptavidin IgG2 HC	319	G319(G319S)[GGC] (1 base change)	Sequence Variant (1 base change)	1:G319-K326 = 823.48035m(G319S)	GLPAPIEK	0.999924	0.999924	0.999924	0.999921	0.999921	0.999921	0.999957	0.999957	0.999957	0.999952	0.999952	0.999952
1:Antistreptavidin IgG2 HC	321	P321+Hydroxylation	+Hydroxylation	1:G319-K326 = 823.4804m(P321+Hydroxylation)	GLPAPIEK	0.997523	0.997523	0.997523	0.997864	0.997864	0.997864	0.998552	0.998552	0.998552	0.998375	0.998375	0.998375
1:Antistreptavidin IgG2 HC	352	K352+Glycation	+Glycation	1:E348-K362 = 1779.8747m(K352+Glycation)	EEMTKNQVSLTCLVK	0.999516	0.999516	0.999516	0.999649	0.999649	0.999649	0.999659	0.999659	0.999659	0.999711	0.999711	0.999711
1:Antistreptavidin IgG2 HC	353	~N353+NH3 loss	+NH3 loss	1:N353-K362 = 1161.6064m(~N353+NH3 loss)	NQVSLTCLVK	0.998805	0.998805	0.998805	0.999062	0.999062	0.999062	0.999345	0.999345	0.999345	0.999363	0.999363	0.999363
1:Antistreptavidin IgG2 HC	353	N353(N353K)[AAC] (1 base change)	Sequence Variant (1 base change)	1:N353-K362 = 1161.6064m(N353K)	NQVSLTCLVK	0.998805	0.998805	0.998805	0.999062	0.999062	0.999062	0.999345	0.999345	0.999345	0.999363	0.999363	0.999363
1:Antistreptavidin IgG2 HC	359	C359(C359Y)[TGC] (1 base change)	Sequence Variant (1 base change)	1:N353-K362 = 1161.6064m(C359Y)	NQVSLTCLVK	0.999846	0.999846	0.999846	0.999873	0.999873	0.999873	0.9999	0.9999	0.9999	0.999908	0.999908	0.999908
1:Antistreptavidin IgG2 HC	362	K362+Hydroxylation	+Hydroxylation	1:N353-K362 = 1161.6064m(K362+Hydroxylation)	NQVSLTCLVK	0.999842	0.999842	0.999842	0.999858	0.999858	0.999858	0.999838	0.999838	0.999838	0.999852	0.999852	0.999852
1:Antistreptavidin IgG2 HC	362	K362+Glycation	+Glycation	1:N353-K384 = 3686.7199m(K362+Glycation)	NQVSLTCLVKGFYPSDIAVEWESNGQPENNYK	0.999842	0.999842	0.999842	0.999858	0.999858	0.999858	0.999838	0.999838	0.999838	0.999852	0.999852	0.999852
1:Antistreptavidin IgG2 HC	368	D368(D368N)[GAC] (1 base change)	Sequence Variant (1 base change)	1:G363-K384 = 2543.1241m(D368N)	GFYPSDIAVEWESNGQPENNYK	0.999927	0.999927	0.999927	0.999968	0.999968	0.999968	0.999948	0.999948	0.999948	0.999942	0.999942	0.999942
1:Antistreptavidin IgG2 HC	370	A370(A370T)[GCC] (1 base change)	Sequence Variant (1 base change)	1:G363-K384 = 2543.1241m(A370T)	GFYPSDIAVEWESNGQPENNYK	0.999942	0.999942	0.999942	0.99993	0.99993	0.99993	0.999953	0.999953	0.999953	0.999948	0.999948	0.999948
1:Antistreptavidin IgG2 HC	375	S375(S375N)[AGC] (1 base change)	Sequence Variant (1 base change)	1:G363-K384 = 2543.1241m(S375N)	GFYPSDIAVEWESNGQPENNYK	0.999817	0.999817	0.999817	0.999851	0.999851	0.999851	0.999867	0.999867	0.999867	0.999866	0.999866	0.999866
1:Antistreptavidin IgG2 HC	376	~N376+Deamidation	+Deamidation	1:G363-K384 = 2543.1241m(~N376+Deamidation)	GFYPSDIAVEWESNGQPENNYK	0.962007	0.962007	0.962007	0.969989	0.969989	0.969989	0.978214	0.978214	0.978214	0.979056	0.979056	0.979056
1:Antistreptavidin IgG2 HC	376	~N376+NH3 loss	+NH3 loss	1:G363-K384 = 2543.1241m(~N376+NH3 loss)	GFYPSDIAVEWESNGQPENNYK	0.962007	0.962007	0.962007	0.969989	0.969989	0.969989	0.978214	0.978214	0.978214	0.979056	0.979056	0.979056
1:Antistreptavidin IgG2 HC	382	~N382+NH3 loss	+NH3 loss	1:G363-K384 = 2543.1241m(~N382+NH3 loss)	GFYPSDIAVEWESNGQPENNYK	0.994442	0.994442	0.994442	0.995783	0.995783	0.995783	0.997234	0.997234	0.997234	0.997375	0.997375	0.997375
1:Antistreptavidin IgG2 HC	384	K384+Glycation	+Glycation	1:G363-K401 = 4430.0001m(K384+Glycation)	GFYPSDIAVEWESNGQPENNYKTTPPMLDSDGSFFLYSK	0.999774	0.999774	0.999774	0.999736	0.999736	0.999736	0.999489	0.999489	0.999489	0.999581	0.999581	0.999581
1:Antistreptavidin IgG2 HC	389	M389(M389I)[ATG] (1 base change)	Sequence Variant (1 base change)	1:T385-K401 = 1904.8866m(M389I)	TTPPMLDSDGSFFLYSK	0.99988	0.99988	0.99988	0.999857	0.999857	0.999857	0.999914	0.999914	0.999914	0.999913	0.999913	0.999913
1:Antistreptavidin IgG2 HC	393	D393+H2O loss	+H2O loss	1:T385-K401 = 1904.8866m(D393+H2O loss)	TTPPMLDSDGSFFLYSK	0.994265	0.994265	0.994265	0.994282	0.994282	0.994282	0.995783	0.995783	0.995783	0.996018	0.996018	0.996018
1:Antistreptavidin IgG2 HC	400	S400(S400N)[AGC] (1 base change)	Sequence Variant (1 base change)	1:T385-K401 = 1904.8866m(S400N)	TTPPMLDSDGSFFLYSK	0.999819	0.999819	0.999819	0.999831	0.999831	0.999831	0.999871	0.999871	0.999871	0.999877	0.999877	0.999877
1:Antistreptavidin IgG2 HC	420	M420+Oxidation	+Oxidation	1:W409-K431 = 2801.2439m(M420+Oxidation)	WQQGNVFSCSVMHEALHNHYTQK	0.990524	0.990524	0.990524	0.992384	0.992384	0.992384	0.993104	0.993104	0.993104	0.991701	0.991701	0.991701
1:Antistreptavidin IgG2 HC	420	M420(M420I)[ATG] (1 base change)	Sequence Variant (1 base change)	1:W409-K431 = 2801.2439m(M420I)	WQQGNVFSCSVMHEALHNHYTQK	0.990524	0.990524	0.990524	0.992384	0.992384	0.992384	0.993104	0.993104	0.993104	0.991701	0.991701	0.991701
1:Antistreptavidin IgG2 HC	426	N426+Deamidation	+Deamidation	1:W409-K431 = 2801.2439m(N426+Deamidation)	WQQGNVFSCSVMHEALHNHYTQK	0.991832	0.991832	0.991832	0.993574	0.993574	0.993574	0.991865	0.991865	0.991865	0.992271	0.992271	0.992271
1:Antistreptavidin IgG2 HC	426	N426+NH3 loss	+NH3 loss	1:W409-K431 = 2801.2439m(N426+NH3 loss)	WQQGNVFSCSVMHEALHNHYTQK	0.991832	0.991832	0.991832	0.993574	0.993574	0.993574	0.991865	0.991865	0.991865	0.992271	0.992271	0.992271
1:Antistreptavidin IgG2 HC	436	S436(S436N)[TCT] (2 base change)	Sequence Variant (2 base change)	1:S432-G438 = 659.34901m(S436N)	SLSLSPG	0.999455	0.999455	0.999455	0.999519	0.999519	0.999519	0.999497	0.999497	0.999497	0.999498	0.999498	0.999498
1:Antistreptavidin IgG2 HC	438	G438-58.0054	Unknown Modification	1:S432-G438 = 659.34901m(G438-58.0054)	SLSLSPG	0.969658	0.969658	0.969658	0.96488	0.96488	0.96488	0.9812	0.9812	0.9812	0.980966	0.980966	0.980966
1:Antistreptavidin IgG2 HC	438	G438+Lys	+Lys	1:S432-G438 = 659.34901m(G438+Lys)	SLSLSPG	0.969658	0.969658	0.969658	0.96488	0.96488	0.96488	0.9812	0.9812	0.9812	0.980966	0.980966	0.980966
2:Antistreptavidin IgG2 LC	1	Q1+17.0265	N-Terminal Extension	2:Q1-R17 = 1676.8482m(Q1+17.0265)	QSVVTQPPSVSGAPGQR	0.985785	0.985785	0.985785	0.988622	0.988622	0.988622	0.990982	0.990982	0.990982	0.9908	0.9908	0.9908
2:Antistreptavidin IgG2 LC	2	S2+N-term clip	N-term Clip	2:S2-R17 = 1565.8162m[nonspecific]	SVVTQPPSVSGAPGQR	0.998785	0.998785	0.998785	0.999037	0.999037	0.999037	0.999349	0.999349	0.999349	0.999342	0.999342	0.999342
2:Antistreptavidin IgG2 LC	5	~T5+GalNAc	O-Glycan	2:Q1-R17 = 1676.8482m(~T5+GalNAc)	QSVVTQPPSVSGAPGQR	0.999783	0.999783	0.999783	0.999849	0.999849	0.999849	0.999835	0.999835	0.999835	0.99985	0.99985	0.99985
2:Antistreptavidin IgG2 LC	14	P14+Hydroxylation	+Hydroxylation	2:Q1-R17 = 1676.8482m(P14+Hydroxylation)	QSVVTQPPSVSGAPGQR	0.99701	0.99701	0.99701	0.997906	0.997906	0.997906	0.998147	0.998147	0.998147	0.998168	0.998168	0.998168
2:Antistreptavidin IgG2 LC	17	R17(R17K)[AGG] (1 base change)	Sequence Variant (1 base change)	2:Q1-R17 = 1676.8482m(R17K)	QSVVTQPPSVSGAPGQR	0.999749	0.999749	0.999749	0.999801	0.999801	0.999801	0.999852	0.999852	0.999852	0.999849	0.999849	0.999849
2:Antistreptavidin IgG2 LC	24	G24(G24R)[GGG] (1 base change)	Sequence Variant (1 base change)	2:V18-G24 = 737.3266m(G24R)	VTISCTG	0.999796	0.999796	0.999796	0.999748	0.999748	0.999748	0.999977	0.999977	0.999977	0.999971	0.999971	0.999971
2:Antistreptavidin IgG2 LC	28	N28(N28K)[AAC] (1 base change)	Sequence Variant (1 base change)	2:V18-N28 = 1112.4656m(N28K)	VTISCTGSSSN	0.999881	0.999881	0.999881	0.999864	0.999864	0.999864	0.999983	0.999983	0.999983	0.999976	0.999976	0.999976
2:Antistreptavidin IgG2 LC	30	G30(G30R)[GGG] (1 base change)	Sequence Variant (1 base change)	2:V18-G30 = 1282.5711m(G30R)	VTISCTGSSSNIG	0.999879	0.999879	0.999879	0.999844	0.999844	0.999844	0.999967	0.999967	0.999967	0.999962	0.999962	0.999962
2:Antistreptavidin IgG2 LC	32	G32+N-term clip	N-term Clip	2:G32-K47 = 1858.9002m[nonspecific]	GYDVHWYQQLPGTAPK	0.999768	0.999768	0.999768	0.999775	0.999775	0.999775	0.999952	0.999952	0.999952	0.99996	0.99996	0.99996
2:Antistreptavidin IgG2 LC	36	H36(H36Q)[CAC] (1 base change)	Sequence Variant (1 base change)	2:V18-K47 = 3194.4979m(H36Q)	VTISCTGSSSNIGAGYDVHWYQQLPGTAPK	0.999889	0.999889	0.999889	0.999901	0.999901	0.999901	0.999914	0.999914	0.999914	0.999906	0.999906	0.999906
2:Antistreptavidin IgG2 LC	37	W37+Double Oxidation	+Double Oxidation	2:V18-K47 = 3194.4979m(W37+Double Oxidation)	VTISCTGSSSNIGAGYDVHWYQQLPGTAPK	0.998375	0.998375	0.998375	0.993767	0.993767	0.993767	0.998748	0.998748	0.998748	0.995092	0.995092	0.995092
2:Antistreptavidin IgG2 LC	37	W37+Oxidation	+Oxidation	2:V18-K47 = 3194.4979m(W37+Oxidation)	VTISCTGSSSNIGAGYDVHWYQQLPGTAPK	0.998375	0.998375	0.998375	0.993767	0.993767	0.993767	0.998748	0.998748	0.998748	0.995092	0.995092	0.995092
2:Antistreptavidin IgG2 LC	48	L48(L48F)[CTC] (1 base change)	Sequence Variant (1 base change)	2:L48-R63 = 1756.9220m(L48F)	LLIYGNSNRPSGVPDR	0.999858	0.999858	0.999858	0.999864	0.999864	0.999864	0.999874	0.999874	0.999874	0.999849	0.999849	0.999849
2:Antistreptavidin IgG2 LC	52	G52(G52D)[GGT] (1 base change)	Sequence Variant (1 base change)	2:L48-R63 = 1756.9220m(G52D)	LLIYGNSNRPSGVPDR	0.999944	0.999944	0.999944	0.99997	0.99997	0.99997	0.999968	0.999968	0.999968	0.999964	0.999964	0.999964
2:Antistreptavidin IgG2 LC	53	N53(N53K)[AAC] (1 base change)	Sequence Variant (1 base change)	2:L48-N53 = 691.39048m(N53K)	LLIYGN	0.993959	0.993959	0.993959	0.995639	0.995639	0.995639	0.995343	0.995343	0.995343	0.994662	0.994662	0.994662
2:Antistreptavidin IgG2 LC	53	N53+Deamidation	+Deamidation	2:L48-R63 = 1756.9220m(N53+Deamidation)	LLIYGNSNRPSGVPDR	0.993959	0.993959	0.993959	0.995639	0.995639	0.995639	0.995343	0.995343	0.995343	0.994662	0.994662	0.994662
2:Antistreptavidin IgG2 LC	54	~S54+GalNAc-3SG	O-Glycan	2:L48-R63 = 1756.9220m(~S54+GalNAc-3SG)	LLIYGNSNRPSGVPDR	0.999737	0.999737	0.999737	0.999849	0.999849	0.999849	0.999678	0.999678	0.999678	0.999675	0.999675	0.999675
2:Antistreptavidin IgG2 LC	59	G59(G59E)[GGG] (1 base change)	Sequence Variant (1 base change)	2:L48-R63 = 1756.9220m(G59E)	LLIYGNSNRPSGVPDR	0.999953	0.999953	0.999953	0.999959	0.999959	0.999959	0.99996	0.99996	0.99996	0.999954	0.999954	0.999954
2:Antistreptavidin IgG2 LC	83	E83(E83K)[GAG] (1 base change)	Sequence Variant (1 base change)	2:S69-E83 = 1404.7096m(E83K)	SGTSASLAITGLQAE	0.999558	0.999558	0.999558	0.999429	0.999429	0.999429	0.999909	0.999909	0.999909	0.999897	0.999897	0.999897
2:Antistreptavidin IgG2 LC	98	S98+N-term clip	N-term Clip	2:S98-K108 = 1128.5815m[nonspecific]	SGLYVFGTGTK	0.995873	0.995873	0.995873	0.990078	0.990078	0.990078	0.999189	0.999189	0.999189	0.998812	0.998812	0.998812
2:Antistreptavidin IgG2 LC	100	L100+N-term clip	N-term Clip	2:L100-K108 = 984.5280m[nonspecific]	LYVFGTGTK	0.999899	0.999899	0.999899	0.999795	0.999795	0.999795	0.999987	0.999987	0.999987	0.99998	0.99998	0.99998
2:Antistreptavidin IgG2 LC	108	K108+Glycation	+Glycation	2:S69-K116 = 5035.3808m(K108+Glycation)	SGTSASLAITGLQAEDEADYYCQSYDSSLSGLYVFGTGTKVTVLGQPK	0.997911	0.997911	0.997911	0.997798	0.997798	0.997798	0.998711	0.998711	0.998711	0.998745	0.998745	0.998745
2:Antistreptavidin IgG2 LC	109	V109(V109I)[GTC] (1 base change)	Sequence Variant (1 base change)	2:V109-K116 = 840.5069m(V109I)	VTVLGQPK	0.999883	0.999883	0.999883	0.999863	0.999863	0.999863	0.999928	0.999928	0.999928	0.999934	0.999934	0.999934
2:Antistreptavidin IgG2 LC	111	V111(V111A)[GTC] (1 base change)	Sequence Variant (1 base change)	2:V109-K116 = 840.5069m(V111A)	VTVLGQPK	0.999738	0.999738	0.999738	0.999703	0.999703	0.999703	0.999837	0.999837	0.999837	0.999848	0.999848	0.999848
2:Antistreptavidin IgG2 LC	111	V111(V111I)[GTC] (1 base change)	Sequence Variant (1 base change)	2:V109-K116 = 840.5069m(V111I)	VTVLGQPK	0.999738	0.999738	0.999738	0.999703	0.999703	0.999703	0.999837	0.999837	0.999837	0.999848	0.999848	0.999848
2:Antistreptavidin IgG2 LC	114	Q114+Deamidation	+Deamidation	2:V109-K116 = 840.5069m(Q114+Deamidation)	VTVLGQPK	0.999934	0.999934	0.999934	0.999911	0.999911	0.999911	0.999974	0.999974	0.999974	0.999972	0.999972	0.999972
2:Antistreptavidin IgG2 LC	144	D144+H2O loss	+H2O loss	2:A136-K155 = 2211.1286m(D144+H2O loss)	ATLVCLISDFYPGAVTVAWK	0.996222	0.996222	0.996222	0.997464	0.997464	0.997464	0.997963	0.997963	0.997963	0.998502	0.998502	0.998502
2:Antistreptavidin IgG2 LC	144	D144(D144G)[GAC] (1 base change)	Sequence Variant (1 base change)	2:A136-K155 = 2211.1286m(D144G)	ATLVCLISDFYPGAVTVAWK	0.996222	0.996222	0.996222	0.997464	0.997464	0.997464	0.997963	0.997963	0.997963	0.998502	0.998502	0.998502
2:Antistreptavidin IgG2 LC	154	W154+Double Oxidation	+Double Oxidation	2:A136-K155 = 2211.1286m(W154+Double Oxidation)	ATLVCLISDFYPGAVTVAWK	0.994823	0.994823	0.994823	0.991203	0.991203	0.991203	0.996875	0.996875	0.996875	0.982362	0.982362	0.982362
2:Antistreptavidin IgG2 LC	154	W154+Oxidation	+Oxidation	2:A136-K155 = 2211.1286m(W154+Oxidation)	ATLVCLISDFYPGAVTVAWK	0.994823	0.994823	0.994823	0.991203	0.991203	0.991203	0.996875	0.996875	0.996875	0.982362	0.982362	0.982362
2:Antistreptavidin IgG2 LC	154	W154+Oxidation to kynurenine	+Oxidation to kynurenine	2:A136-K155 = 2211.1286m(W154+Oxidation to kynurenine)	ATLVCLISDFYPGAVTVAWK	0.994823	0.994823	0.994823	0.991203	0.991203	0.991203	0.996875	0.996875	0.996875	0.982362	0.982362	0.982362
2:Antistreptavidin IgG2 LC	155	K155+Glycation	+Glycation	2:A136-K162 = 2895.4728m(K155+Glycation)	ATLVCLISDFYPGAVTVAWKADSSPVK	0.989443	0.989443	0.989443	0.989816	0.989816	0.989816	0.986807	0.986807	0.986807	0.986857	0.986857	0.986857
2:Antistreptavidin IgG2 LC	162	K162+Glycation	+Glycation	2:A156-K172 = 1673.8472m(K162+Glycation)	ADSSPVKAGVETTTPSK	0.998948	0.998948	0.998948	0.999193	0.999193	0.999193	0.999527	0.999527	0.999527	0.999692	0.999692	0.999692
2:Antistreptavidin IgG2 LC	164	G164(G164E)[GGA] (1 base change)	Sequence Variant (1 base change)	2:A163-K172 = 989.5029m(G164E)	AGVETTTPSK	0.999893	0.999893	0.999893	0.999931	0.999931	0.999931	0.999938	0.999938	0.999938	0.999955	0.999955	0.999955
2:Antistreptavidin IgG2 LC	165	V165(V165M)[GTG] (1 base change)	Sequence Variant (1 base change)	2:A163-K172 = 989.5029m(V165M)	AGVETTTPSK	0.999942	0.999942	0.999942	0.999953	0.999953	0.999953	0.999967	0.999967	0.999967	0.999969	0.999969	0.999969
2:Antistreptavidin IgG2 LC	177	K177+Glycation	+Glycation	2:Q173-K192 = 2314.1230m(K177+Glycation)	QSNNKYAASSYLSLTPEQWK	0.998981	0.998981	0.998981	0.998948	0.998948	0.998948	0.999407	0.999407	0.999407	0.999278	0.999278	0.999278
2:Antistreptavidin IgG2 LC	185	S185(S185R)[AGC] (1 base change)	Sequence Variant (1 base change)	2:Y178-S185 = 860.3916m(S185R)	YAASSYLS	0.999041	0.999041	0.999041	0.999042	0.999042	0.999042	0.999508	0.999508	0.999508	0.999424	0.999424	0.999424
2:Antistreptavidin IgG2 LC	185	S185(S185N)[AGC] (1 base change)	Sequence Variant (1 base change)	2:Y178-K192 = 1742.8516m(S185N)	YAASSYLSLTPEQWK	0.999041	0.999041	0.999041	0.999042	0.999042	0.999042	0.999508	0.999508	0.999508	0.999424	0.999424	0.999424
2:Antistreptavidin IgG2 LC	191	W191+Double Oxidation	+Double Oxidation	2:Y178-K192 = 1742.8516m(W191+Double Oxidation)	YAASSYLSLTPEQWK	0.999222	0.999222	0.999222	0.996738	0.996738	0.996738	0.999318	0.999318	0.999318	0.997059	0.997059	0.997059
2:Antistreptavidin IgG2 LC	191	W191+Oxidation	+Oxidation	2:Y178-K192 = 1742.8516m(W191+Oxidation)	YAASSYLSLTPEQWK	0.999222	0.999222	0.999222	0.996738	0.996738	0.996738	0.999318	0.999318	0.999318	0.997059	0.997059	0.997059
2:Antistreptavidin IgG2 LC	192	K192+Glycation	+Glycation	2:Y178-R195 = 2123.0436m(K192+Glycation)	YAASSYLSLTPEQWKSHR	0.998208	0.998208	0.998208	0.998411	0.998411	0.998411	0.999596	0.999596	0.999596	0.999522	0.999522	0.999522
2:Antistreptavidin IgG2 LC	196	S196(S196N)[AGC] (1 base change)	Sequence Variant (1 base change)	2:S196-K210 = 1711.7359m(S196N)	SYSCQVTHEGSTVEK	0.999946	0.999946	0.999946	0.999958	0.999958	0.999958	0.999953	0.999953	0.999953	0.999915	0.999915	0.999915
2:Antistreptavidin IgG2 LC	198	S198(S198N)[AGC] (1 base change)	Sequence Variant (1 base change)	2:S196-K210 = 1711.7359m(S198N)	SYSCQVTHEGSTVEK	0.999561	0.999561	0.999561	0.999525	0.999525	0.999525	0.999594	0.999594	0.999594	0.999458	0.999458	0.999458
2:Antistreptavidin IgG2 LC	201	V201(V201I)[GTC] (1 base change)	Sequence Variant (1 base change)	2:S196-K210 = 1711.7359m(V201I)	SYSCQVTHEGSTVEK	0.999874	0.999874	0.999874	0.99985	0.99985	0.99985	0.999867	0.999867	0.999867	0.999809	0.999809	0.999809
2:Antistreptavidin IgG2 LC	201	V201(V201M)[GTC] (2 base change)	Sequence Variant (2 base change)	2:S196-K210 = 1711.7359m(V201M)	SYSCQVTHEGSTVEK	0.999874	0.999874	0.999874	0.99985	0.99985	0.99985	0.999867	0.999867	0.999867	0.999809	0.999809	0.999809
2:Antistreptavidin IgG2 LC	203	H203(H203Q)[CAT] (1 base change)	Sequence Variant (1 base change)	2:S196-K210 = 1711.7359m(H203Q)	SYSCQVTHEGSTVEK	0.999979	0.999979	0.999979	0.999981	0.999981	0.999981	0.999941	0.999941	0.999941	0.999935	0.999935	0.999935
2:Antistreptavidin IgG2 LC	205	G205(G205D)[GGG] (2 base change)	Sequence Variant (2 base change)	2:S196-K210 = 1711.7359m(G205D)	SYSCQVTHEGSTVEK	0.999944	0.999944	0.999944	0.999918	0.999918	0.999918	0.999923	0.999923	0.999923	0.999893	0.999893	0.999893
2:Antistreptavidin IgG2 LC	206	S206(S206N)[AGC] (1 base change)	Sequence Variant (1 base change)	2:S196-K210 = 1711.7359m(S206N)	SYSCQVTHEGSTVEK	0.999836	0.999836	0.999836	0.999782	0.999782	0.999782	0.999833	0.999833	0.999833	0.999767	0.999767	0.999767
2:Antistreptavidin IgG2 LC	210	K210+Glycation	+Glycation	2:S196-S218 = 2558.0789m(K210+Glycation)	SYSCQVTHEGSTVEKTVAPTECS	0.999768	0.999768	0.999768	0.999706	0.999706	0.999706	0.999383	0.999383	0.999383	0.999215	0.999215	0.999215

## Sheet: Stressed
Antistreptavidin IgG2 Sample 1
(a-Calibration)
Protein Sequence
>Antistreptavidin IgG2 HC
QLQLQESGPGLVKPSGTLSLTCAVSGGSISSGNWWSWVRQPPGKGLEWIGEISHSGTTNYNPSLKSRVTISGDKSKNQFSLELTSVTAADTAVYYCARNFDYWGQGTLVTVSSASTKGPSVFPLAPCSRSTSESTAALGCLVKDYFPEPVTVSWNSGALTSGVHTFPAVLQSSGLYSLSSVVTVPSSNFGTQTYTCNVDHKPSNTKVDKTVERKCCVECPPCPAPPVAGPSVFLFPPKPKDTLMISRTPEVTCVVVDVSHEDPEVQFNWYVDGVEVHNAKTKPREEQFNSTFRVVSVLTVVHQDWLNGKEYKCKVSNKGLPAPIEKTISKTKGQPREPQVYTLPPSREEMTKNQVSLTCLVKGFYPSDIAVEWESNGQPENNYKTTPPMLDSDGSFFLY…
>Antistreptavidin IgG2 LC
QSVVTQPPSVSGAPGQRVTISCTGSSSNIGAGYDVHWYQQLPGTAPKLLIYGNSNRPSGVPDRFSGSKSGTSASLAITGLQAEDEADYYCQSYDSSLSGLYVFGTGTKVTVLGQPKANPTVTLFPPSSEELQANKATLVCLISDFYPGAVTVAWKADSSPVKAGVETTTPSKQSNNKYAASSYLSLTPEQWKSHRSYSCQVTHEGSTVEKTVAPTECS
Protease = Trypsin
Cleaves at C-terminus of KR
Key Data Processing Parameters
MS Noise Level = 3600
S/N Threshold = 331
Typical Chromatographic Peak Width = 0.14
Maximum Chromatographic Peak Width = 1.61
Mass Tolerance = 5 ppm
Max Time Shift before Alignment = 3.18 min
Maximum Peptide Mass = 6800
Mass Accuracy = 6 ppm
Disulfide Bonds = Reduced
Glycosylation = CHO Glycan
Crosslinks = No
Minimum Confidence = 0.8
Mass Changes for Unspecified Modifications = -58 - 17
Amino Acid Substitutions = Common misincorporations
Ion Selection Criteria for Quantitation
Peptide Selection Criteria = 50% of the most abundant peptide
Charge Selection Criteria = 33% of the most abundant charge state
File Name						ATS_Try_S1 (2)	ATS_Try_S2 (2)	ATS_Try_S3 (2)	ATS_Try_S1 (3)	ATS_Try_S2 (3)	ATS_Try_S3 (3)	ATS_Try_S1 (4)	ATS_Try_S2 (4)	ATS_Try_S3 (4)	ATS_Try_S1 (5)	ATS_Try_S2 (5)	ATS_Try_S3 (5)
Sample Name						ATS_Try_Stability	ATS_Try_Stability	ATS_Try_Stability	ATS_Try_Stability	ATS_Try_Stability	ATS_Try_Stability	ATS Stability	ATS Stability	ATS Stability	ATS Stability	ATS Stability	ATS Stability
Sample Id						8	9	10	8	9	10	11	12	13	11	12	13
Comment						Expt #2A, Column peptide CSH15cm, HPLC:Knox, Biospin desalting	Expt #2A, Column peptide CSH15cm, HPLC:Knox, Biospin desalting	Expt #2A, Column peptide CSH15cm, HPLC:Knox, Biospin desalting	Expt #2A, Column peptide CSH15cm, HPLC:Knox, Microcon 30K digestion	Expt #2A, Column peptide CSH15cm, HPLC:Knox, Microcon 30K digestion	Expt #2A, Column peptide CSH15cm, HPLC:Knox, Microcon 30K digestion	MAM expt 2A- Biospin_ MS: Lumos, LC: 1290 (Knox), peptide CSHcolumn with FA	MAM expt 2A- Biospin_ MS: Lumos, LC: 1290 (Knox), peptide CSHcolumn with FA	MAM expt 2A- Biospin_ MS: Lumos, LC: 1290 (Knox), peptide CSHcolumn with FA	MAM expt 2A- Biospin_ MS: Lumos, LC: 1290 (Knox), peptide CSHcolumn with FA	MAM expt 2A- Biospin_ MS: Lumos, LC: 1290 (Knox), peptide CSHcolumn with FA	MAM expt 2A- Biospin_ MS: Lumos, LC: 1290 (Knox), peptide CSHcolumn with FA
Injection Time (h)						199.062	200.156	201.251	245.835	246.93	248.024	362.672	363.766	364.861	383.984	385.079	386.173
Quality Controls
			Relative Load			0.349	0.363	0.366	0.285	0.264	0.271	0.787	0.847	0.86	1	0.987	0.95
			Identification Rate (by area)			0.667	0.6791	0.6776	0.6762	0.6708	0.6768	0.6949	0.704	0.7078	0.7019	0.7011	0.6978
			Abundance of Top Unidentified (> 500 Da, relative to top identified)			0.3024	0.2597	0.2669	0.3838	0.3693	0.3945	0.4607	0.3181	0.3641	0.6408	0.6323	0.609
			Digestion Efficiency			1	1	1	1	1	1	1	1	1	1	1	1
			Intensity&Length-Weighted Sequence Coverage			0.4595	0.4576	0.4591	0.4402	0.45	0.445	0.5242	0.5261	0.5277	0.5336	0.5329	0.5346
			Ions (Modified) Meeting Selection Criteria for Quantitation			265	265	265	262	265	264	265	265	265	265	265	265
Protein	Residue #	Modification	Category	Modified Peptides	Peptide Sequence	Abundance as Peak Area												Avg	RSD
1:Antistreptavidin IgG2 HC	1	Q1+17.0265	N-Terminal Extension	1:Q1-R39 = 4113.0266m(Q1+17.0265)	QLQLQESGPGLVKPSGTLSLTCAVSGGSISSGNWWSWVR	0.00353337	0.00253993	0.0028658	0.00204018	0.00245344	0.00216337	0.00126707	0.0010552	0.00089615	0.00123567	0.0010724	0.00113342	0.00185467	0.466001
1:Antistreptavidin IgG2 HC	13	K13+Glycation	+Glycation	1:Q1-R39 = 4113.0266m(K13+Glycation)	QLQLQESGPGLVKPSGTLSLTCAVSGGSISSGNWWSWVR	0.00024965	0.000255361	0.000208172	0.000213237	0.000201337	0.00024553	0.000227626	0.000233829	0.000224401	0.000311337	0.000307229	0.000322256	0.000249997	0.167089
1:Antistreptavidin IgG2 HC	30	S30+C-term clip	C-term Clip	1:Q1-S30 = 2954.4907m[nonspecific]	QLQLQESGPGLVKPSGTLSLTCAVSGGSIS	0.00186357	0.00191108	0.00232476	0.000654573	0.000952086	0.000877915	0.000595893	0.000602936	0.000539803	0.000359438	0.000341509	0.000341969	0.000947128	0.728961
1:Antistreptavidin IgG2 HC	31	S31+N-term clip	N-term Clip	1:S31-R39 = 1176.5465m[nonspecific]	SGNWWSWVR	0.00726818	0.00704001	0.00708288	0.0151931	0.0116054	0.00742682	0.00170668	0.00170655	0.00160053	0.00257068	0.00254841	0.00251143	0.00568839	0.773092
1:Antistreptavidin IgG2 HC	34	~W34+Double Oxidation	+Double Oxidation	1:Q1-R39 = 4113.0266m(~W34+Double Oxidation)	QLQLQESGPGLVKPSGTLSLTCAVSGGSISSGNWWSWVR	0.00175199	0.00170173	0.00205412	0.00197889	0.00274497	0.00196459	0.00209992	0.00198762	0.00179635	0.00316334	0.00311783	0.00292231	0.00227364	0.241511
1:Antistreptavidin IgG2 HC	34	~W34+Oxidation to kynurenine	+Oxidation to kynurenine	1:Q1-R39 = 4113.0266m(~W34+Oxidation to kynurenine)	QLQLQESGPGLVKPSGTLSLTCAVSGGSISSGNWWSWVR	0.00473113	0.00444157	0.00529596	0.00416949	0.00539504	0.00531905	0.00375182	0.00402985	0.00363065	0.004346	0.00435966	0.00425359	0.00447698	0.133101
1:Antistreptavidin IgG2 HC	37	~W37+Double Oxidation	+Double Oxidation	1:Q1-R39 = 4113.0266m(~W37+Double Oxidation)	QLQLQESGPGLVKPSGTLSLTCAVSGGSISSGNWWSWVR	0.00100096	0.000930345	0.00130849	0.00112109	0.00127489	0.00126583	0.00141157	0.00137283	0.000924773	0.00294335	0.00274882	0.00207694	0.00153166	0.447936
1:Antistreptavidin IgG2 HC	44	K44+Glycation	+Glycation	1:Q40-K65 = 2809.4035m(K44+Glycation)	QPPGKGLEWIGEISHSGTTNYNPSLK	0.000645924	0.000627934	0.000662424	0.000639916	0.000512171	0.000600035	0.000406786	0.000424623	0.000413364	0.000463631	0.000438052	0.000507231	0.000528508	0.190165
1:Antistreptavidin IgG2 HC	48	W48+Double Oxidation	+Double Oxidation	1:G45-K65 = 2302.1230m(W48+Double Oxidation)	GLEWIGEISHSGTTNYNPSLK	0.000490516	0.000443057	0.000411015	0.00149236	0.000698961	0.00111548	0.000374502	0.000345355	0.00033424	0.00111358	0.000674295	0.000940695	0.000702838	0.540754
1:Antistreptavidin IgG2 HC	48	W48+Oxidation	+Oxidation	1:G45-K65 = 2302.1230m(W48+Oxidation)	GLEWIGEISHSGTTNYNPSLK	0.000106514	0.000112676	0.000113937	0.000106619	8.76584e-05	0.000101774	7.64853e-05	7.51383e-05	7.45488e-05	9.3038e-05	8.43985e-05	9.55021e-05	9.40241e-05	0.153757
1:Antistreptavidin IgG2 HC	55	S55+C-term clip	C-term Clip	1:G45-S55 = 1226.5932m[nonspecific]	GLEWIGEISHS	6.31262e-05	8.01092e-05	8.69905e-05	0.00017078	0.000170386	0.000190984	2.32463e-05	1.90932e-05	5.21258e-05	0.000105878	0.000105454	9.14655e-05	9.66366e-05	0.582849
1:Antistreptavidin IgG2 HC	56	G56(G56R)[GGG] (1 base change)	Sequence Variant (1 base change)	1:G45-G56 = 1283.6146m(G56R)	GLEWIGEISHSG	4.22677e-05	4.54115e-05	4.18098e-05	6.99633e-05	7.2296e-05	7.64384e-05	2.10854e-05	1.94106e-05	2.00739e-05	2.99445e-05	2.61294e-05	2.62193e-05	4.09208e-05	0.518829
1:Antistreptavidin IgG2 HC	56	G56+N-term clip	N-term Clip	1:G56-K65 = 1093.5404m[nonspecific]	GTTNYNPSLK	0.000185661	0.000203184	0.000204013	0.00020505	0.000231023	0.000225187	0.00011584	0.000119412	0.000129611	0.000138188	0.00013955	0.00015323	0.000170829	0.248589
1:Antistreptavidin IgG2 HC	59	N59(N59K)[AAC] (1 base change)	Sequence Variant (1 base change)	1:G45-N59 = 1599.7529m(N59K)	GLEWIGEISHSGTTN	8.30684e-05	8.49051e-05	8.9155e-05	0.000102797	8.39535e-05	9.95232e-05	3.54351e-05	3.39238e-05	3.54468e-05	4.55345e-05	4.20046e-05	4.66296e-05	6.5198e-05	0.419886
1:Antistreptavidin IgG2 HC	65	K65+Glycation	+Glycation	1:G45-R67 = 2545.2561m(K65+Glycation)	GLEWIGEISHSGTTNYNPSLKSR	0.000455611	0.0004522	0.000454704	0.000469089	0.000388998	0.000469124	0.000219688	0.000215203	0.000223201	0.000258838	0.000251675	0.000255632	0.00034283	0.329013
1:Antistreptavidin IgG2 HC	67	R67(R67Q)[CGA] (1 base change)	Sequence Variant (1 base change)	1:S66-K74 = 961.5193m(R67Q)	SRVTISGDK	0.000159315	7.1813e-05	7.56434e-05	7.50682e-05	6.32517e-05	5.96681e-05	7.31146e-05	9.24313e-05	9.63305e-05	0.000572059	0.00240074	0.00118346	0.000410241	1.73058
1:Antistreptavidin IgG2 HC	68	V68(V68I)[GTC] (1 base change)	Sequence Variant (1 base change)	1:V68-K74 = 718.38612m(V68I)	VTISGDK	0.000180857	8.66092e-05	8.86168e-05	0.000101519	8.7433e-05	8.62078e-05	7.61368e-05	9.18219e-05	9.78272e-05	0.000500781	0.00223851	0.00115315	0.000399122	1.65113
1:Antistreptavidin IgG2 HC	107	~T107+GalNAc-3SG	O-Glycan	1:N99-K117 = 2059.9851m(~T107+GalNAc-3SG)	NFDYWGQGTLVTVSSASTK	0.000261666	0.000214255	0.000222438	5.63709e-05	7.61649e-05	4.58816e-05	0.0001237	0.000128296	0.000128188	7.26447e-05	8.6943e-05	4.58248e-05	0.000121864	0.605312
1:Antistreptavidin IgG2 HC	107	T107+N-term clip	N-term Clip	1:T107-K117 = 1092.6027m[nonspecific]	TLVTVSSASTK	0.000244057	0.000251487	0.000205377	0.000314202	0.000299782	0.000450603	5.90066e-05	6.01014e-05	6.93282e-05	6.70353e-05	6.61109e-05	7.41966e-05	0.000180107	0.736648
1:Antistreptavidin IgG2 HC	117	K117+Hydroxylation	+Hydroxylation	1:N99-K117 = 2059.9851m(K117+Hydroxylation)	NFDYWGQGTLVTVSSASTK	0.047163	0.0463297	0.0481247	0.0331469	0.041525	0.042966	0.0505144	0.0510497	0.0512668	0.0452798	0.0464488	0.0435849	0.0456166	0.110367
1:Antistreptavidin IgG2 HC	120	~S120+GalNAc-3SG	O-Glycan	1:G118-R129 = 1287.6282m(~S120+GalNAc-3SG)	GPSVFPLAPCSR	7.79267e-05	8.46889e-05	8.21274e-05	7.74037e-05	8.24184e-05	8.63143e-05	0.000143037	0.000145501	0.000160595	0.000131724	0.000139212	0.000123822	0.000111231	0.287387
1:Antistreptavidin IgG2 HC	121	V121(V121I)[GTC] (1 base change)	Sequence Variant (1 base change)	1:G118-R129 = 1287.6282m(V121I)	GPSVFPLAPCSR	9.28379e-05	9.57674e-05	8.45397e-05	8.86682e-05	0.000104224	9.46258e-05	4.83276e-05	4.9095e-05	5.1912e-05	5.41951e-05	5.59379e-05	5.09166e-05	7.25873e-05	0.307728
1:Antistreptavidin IgG2 HC	122	F122(F122Y)[TTC] (1 base change)	Sequence Variant (1 base change)	1:G118-R129 = 1287.6282m(F122Y)	GPSVFPLAPCSR	0.000104517	0.000102946	0.000100308	8.88634e-05	0.000105048	9.86035e-05	6.17431e-05	6.71073e-05	6.88031e-05	6.71414e-05	6.59047e-05	6.59999e-05	8.30821e-05	0.219642
1:Antistreptavidin IgG2 HC	127	C127+C-term clip	C-term Clip	1:G118-C127 = 1044.4950m[nonspecific]	GPSVFPLAPC	0.000448217	0.000423772	0.000423641	0.000454228	0.000791858	0.000627739	0.000193766	0.000208196	0.000208358	0.00032489	0.0003039	0.000309213	0.000393148	0.453979
1:Antistreptavidin IgG2 HC	127	C127(C127Y)[TGC] (1 base change)	Sequence Variant (1 base change)	1:G118-R129 = 1287.6282m(C127Y)	GPSVFPLAPCSR	2.38205e-05	2.47631e-05	2.55523e-05	4.54994e-05	4.96301e-05	4.73972e-05	1.0915e-05	1.16026e-05	1.01377e-05	2.27328e-05	2.24778e-05	2.49833e-05	2.6626e-05	0.520014
1:Antistreptavidin IgG2 HC	129	R129(R129K)[AGG] (1 base change)	Sequence Variant (1 base change)	1:G118-R129 = 1287.6282m(R129K)	GPSVFPLAPCSR	6.91486e-05	7.36323e-05	6.88379e-05	6.70374e-05	7.92627e-05	8.35602e-05	3.50927e-05	3.89243e-05	4.11787e-05	4.40408e-05	4.50953e-05	4.40403e-05	5.74876e-05	0.305728
1:Antistreptavidin IgG2 HC	131	T131+N-term clip	N-term Clip	1:T131-K143 = 1336.6544m[nonspecific]	TSESTAALGCLVK	0.000504052	0.00049867	0.00051778	0.000513451	0.000501094	0.000448933	0.000286729	0.000321227	0.000294253	0.000318699	0.000328376	0.000328231	0.000405125	0.243123
1:Antistreptavidin IgG2 HC	132	S132+N-term clip	N-term Clip	1:S132-K143 = 1235.6068m[nonspecific]	SESTAALGCLVK	0.00241265	0.00249788	0.00259322	0.00245937	0.00240351	0.00186302	0.00184174	0.00196601	0.0018219	0.0021019	0.00216205	0.002065	0.00218235	0.128304
1:Antistreptavidin IgG2 HC	134	S134(S134N)[AGC] (1 base change)	Sequence Variant (1 base change)	1:S130-K143 = 1423.6865m(S134N)	STSESTAALGCLVK	0.000268724	0.000279011	0.000284136	0.000262015	0.000259572	0.000228372	0.000173365	0.000182255	0.000181359	0.000196835	0.000218485	0.000209328	0.000228621	0.178039
1:Antistreptavidin IgG2 HC	134	S134+N-term clip	N-term Clip	1:S134-K143 = 1019.5321m[nonspecific]	STAALGCLVK	0.00297588	0.00302483	0.00304743	0.00342373	0.00406893	0.00321947	0.00132127	0.00145961	0.00144588	0.00168548	0.0017464	0.0017464	0.00243044	0.39148
1:Antistreptavidin IgG2 HC	135	T135+N-term clip	N-term Clip	1:T135-K143 = 932.5001m[nonspecific]	TAALGCLVK	0.00050807	0.000532305	0.000509381	0.000638166	0.000715913	0.000598356	0.000229568	0.000253413	0.000243879	0.000291297	0.000302328	0.000282812	0.000425457	0.412762
1:Antistreptavidin IgG2 HC	136	A136(A136T)[GCG] (1 base change)	Sequence Variant (1 base change)	1:S130-K143 = 1423.6865m(A136T)	STSESTAALGCLVK	2.71746e-05	3.87942e-05	3.91539e-05	3.93734e-05	3.06e-05	3.46041e-05	2.47836e-05	2.37836e-05	2.1514e-05	2.81771e-05	3.14243e-05	2.66483e-05	3.05026e-05	0.204964
1:Antistreptavidin IgG2 HC	140	C140(C140Y)[TGC] (1 base change)	Sequence Variant (1 base change)	1:S130-K143 = 1423.6865m(C140Y)	STSESTAALGCLVK	0.00018826	0.000179271	0.000177056	0.000200913	0.000222044	0.000207868	0.000131708	0.000136069	0.000133942	0.000141543	0.000137168	0.000144657	0.000166708	0.197173
1:Antistreptavidin IgG2 HC	142	V142(V142I)[GTC] (1 base change)	Sequence Variant (1 base change)	1:S130-K143 = 1423.6865m(V142I)	STSESTAALGCLVK	5.24523e-05	4.97343e-05	5.00925e-05	5.58568e-05	4.91134e-05	5.3828e-05	3.41074e-05	3.37689e-05	3.39593e-05	4.02972e-05	3.90521e-05	4.17967e-05	4.45049e-05	0.185301
1:Antistreptavidin IgG2 HC	154	~W154+Double Oxidation	+Double Oxidation	1:D144-K206 = 6763.2341m(~W154+Double Oxidation)	DYFPEPVTVSWNSGALTSGVHTFPAVLQSSGLYSLSSVVTVPSSNFGTQTYTCNVDHKPSNTK	0.000997595	0.00129489	0.00168806	0.00234132	0.0013429	0.00187986	0.00148936	0.0013699	0.000793444	0.00479222	0.00307128	0.00220332	0.00193868	0.565388
1:Antistreptavidin IgG2 HC	154	W154+Oxidation	+Oxidation	1:D144-K206 = 6763.2341m(W154+Oxidation)	DYFPEPVTVSWNSGALTSGVHTFPAVLQSSGLYSLSSVVTVPSSNFGTQTYTCNVDHKPSNTK	0.0151118	0.0154356	0.0171616	0.018226	0.0159971	0.0155675	0.0130871	0.0152609	0.0148519	0.0132219	0.0133994	0.0131696	0.0150409	0.108696
1:Antistreptavidin IgG2 HC	155	N155(N155K)[AAC] (1 base change)	Sequence Variant (1 base change)	1:D144-N155 = 1452.6561m(N155K)	DYFPEPVTVSWN	0.00015259	0.000135667	0.000134691	0.00042464	0.000245264	0.000177781	2.40439e-05	5.9325e-05	5.22081e-05	8.94749e-05	0.000103928	9.53857e-05	0.00014125	0.761368
1:Antistreptavidin IgG2 HC	158	A158+N-term clip	N-term Clip	1:A158-K206 = 5184.5350m[nonspecific]	ALTSGVHTFPAVLQSSGLYSLSSVVTVPSSNFGTQTYTCNVDHKPSNTK	0.000111266	9.78787e-05	3.52572e-05	2.42263e-05	9.65042e-05	2.67601e-05	0.000106049	8.53263e-05	8.92791e-05	0.000139296	0.00016152	0.000122303	9.13055e-05	0.475418
1:Antistreptavidin IgG2 HC	160	T160+C-term clip	C-term Clip	1:D144-T160 = 1881.8785m[nonspecific]	DYFPEPVTVSWNSGALT	0.00011874	0.000133296	0.00013995	0.000287066	0.000295889	0.000267498	6.14022e-05	6.20743e-05	6.88763e-05	0.00017875	0.000180449	0.000169633	0.000163635	0.512302
1:Antistreptavidin IgG2 HC	161	S161+N-term clip	N-term Clip	1:S161-K206 = 4899.3661m[nonspecific]	SGVHTFPAVLQSSGLYSLSSVVTVPSSNFGTQTYTCNVDHKPSNTK	0.000433265	0.000462991	0.000411984	0.000454739	0.000461033	0.000403161	0.000218543	0.000235356	0.000211611	0.000353249	0.000348942	0.000283801	0.000356556	0.271549
1:Antistreptavidin IgG2 HC	191	T191+N-term clip	N-term Clip	1:T191-K206 = 1893.8527m[nonspecific]	TQTYTCNVDHKPSNTK	0.00209974	0.00228892	0.0021685	0.00753713	0.00429253	0.00391605	0.000351332	0.000386734	0.00038039	0.000667836	0.000662578	0.000581807	0.00211113	1.04052
1:Antistreptavidin IgG2 HC	199	D199+H2O loss	+H2O loss	1:D144-K206 = 6763.2341m(D199+H2O loss)	DYFPEPVTVSWNSGALTSGVHTFPAVLQSSGLYSLSSVVTVPSSNFGTQTYTCNVDHKPSNTK	0.00664603	0.00614286	0.00663928	0.00755124	0.00605684	0.00630429	0.00535046	0.00599985	0.00579087	0.00543738	0.00569547	0.00568856	0.00610859	0.100902
1:Antistreptavidin IgG2 HC	238	K238+Glycation	+Glycation	1:C215-K240 = 2911.3305m(K238+Glycation)	CCVECPPCPAPPVAGPSVFLFPPKPK	0.00342725	0.00355457	0.00345054	0.00271902	0.00268606	0.00322539	0.00269906	0.00267785	0.00280392	0.00294223	0.00317519	0.00301518	0.00303135	0.107892
1:Antistreptavidin IgG2 HC	240	K240+Glycation	+Glycation	1:P239-R247 = 1059.5747m(K240+Glycation)	PKDTLMISR	0.00483354	0.0047204	0.00484684	0.00274302	0.00307482	0.00247912	0.0025052	0.00243603	0.00252021	0.00141887	0.00168475	0.00113156	0.0028662	0.450927
1:Antistreptavidin IgG2 HC	241	D241+H2O loss	Artifact-Detection	1:D241-R247 = 834.42694m(D241+H2O loss)	DTLMISR	0.00511783	0.00420333	0.00443782	0.00395052	0.00351811	0.00377356	0.0199224	0.0201634	0.0212335	0.0225345	0.0227693	0.0214844	0.0127591	0.706728
1:Antistreptavidin IgG2 HC	244	M244+Double Oxidation	+Double Oxidation	1:D241-R247 = 834.4269m(M244+Double Oxidation)	DTLMISR	4.15705e-05	4.68558e-05	4.21807e-05	5.61574e-05	5.27262e-05	5.73641e-05	2.38987e-05	2.05091e-05	2.46986e-05	1.96593e-05	3.16457e-05	3.04203e-05	3.73072e-05	0.373896
1:Antistreptavidin IgG2 HC	244	M244+Oxidation	+Oxidation	1:D241-R247 = 834.4269m(M244+Oxidation)	DTLMISR	0.0350384	0.0359863	0.035802	0.0356798	0.0363985	0.0375959	0.0319844	0.0338066	0.0339461	0.0425829	0.0408178	0.0409495	0.0367157	0.087613
1:Antistreptavidin IgG2 HC	244	M244(M244I)[ATG] (1 base change)	Sequence Variant (1 base change)	1:D241-R247 = 834.4269m(M244I)	DTLMISR	0.000139363	0.00013074	0.000130883	0.000139826	0.000149121	0.000149819	6.78186e-05	8.93573e-05	7.95988e-05	0.000108782	9.63634e-05	9.53095e-05	0.000114748	0.249224
1:Antistreptavidin IgG2 HC	259	S259(S259R)[AGC] (1 base change)	Sequence Variant (1 base change)	1:T248-S259 = 1304.6170m(S259R)	TPEVTCVVVDVS	0.000194448	0.000255535	0.000233968	0.000259654	0.000116421	0.000177314	0.000107081	9.95036e-05	0.000116277	6.92696e-05	7.41628e-05	6.95051e-05	0.000147762	0.492603
1:Antistreptavidin IgG2 HC	262	D262+C-term clip	C-term Clip	1:T248-D262 = 1685.7454m[nonspecific]	TPEVTCVVVDVSHED	0.00860618	0.0115431	0.0118313	0.00855178	0.00463052	0.00671528	0.00688748	0.00759764	0.00825269	0.00406144	0.00465676	0.00492129	0.00735462	0.351568
1:Antistreptavidin IgG2 HC	268	N268(N268K)[AAC] (1 base change)	Sequence Variant (1 base change)	1:T248-N268 = 2400.0791m(N268K)	TPEVTCVVVDVSHEDPEVQFN	0.000482664	0.000650794	0.000642162	0.000962589	0.000297022	0.000397503	0.000879934	0.000824038	0.00115586	0.000565635	0.000599113	0.000581467	0.000669898	0.366434
1:Antistreptavidin IgG2 HC	269	W269+Double Oxidation	+Double Oxidation	1:T248-K280 = 3797.7519m(W269+Double Oxidation)	TPEVTCVVVDVSHEDPEVQFNWYVDGVEVHNAK	0.000563921	0.000664504	0.000540758	0.000819036	0.000372607	0.000434336	0.000631941	0.000607728	0.000544063	0.00202066	0.00158517	0.00133857	0.000843608	0.615165
1:Antistreptavidin IgG2 HC	280	~K280+Glycation	+Glycation	1:T248-R284 = 4280.0484m(~K280+Glycation)	TPEVTCVVVDVSHEDPEVQFNWYVDGVEVHNAKTKPR	0.0101764	0.0138081	0.0122778	0.0100516	0.00617581	0.00616228	0.00489456	0.00575788	0.00572006	0.00320592	0.00392847	0.00365471	0.00715113	0.494129
1:Antistreptavidin IgG2 HC	289	N289+A1G0	N-Glycan	1:E285-R293 = 1156.5149m(N289+A1G0)	EEQFNSTFR	0.00322192	0.00314464	0.00321751	0.00320252	0.00297334	0.003231	0.00382542	0.00375597	0.00386383	0.00426737	0.00395452	0.00397668	0.00355289	0.12045
1:Antistreptavidin IgG2 HC	289	N289+A1G0F	N-Glycan	1:E285-R293 = 1156.5149m(N289+A1G0F)	EEQFNSTFR	0.0117943	0.0114421	0.0110825	0.0125032	0.0135011	0.0135161	0.00437498	0.00449462	0.00501778	0.0051793	0.00519611	0.00536384	0.00862216	0.454816
1:Antistreptavidin IgG2 HC	289	N289+A1G0M4	N-Glycan	1:E285-R293 = 1156.5149m(N289+A1G0M4)	EEQFNSTFR	0.000606657	0.000571746	0.000563852	0.000448509	0.000477588	0.000554079	0.000772995	0.000760347	0.000807351	0.00076564	0.000842635	0.000840025	0.000667619	0.216533
1:Antistreptavidin IgG2 HC	289	N289+A1G0M5	N-Glycan	1:E285-R293 = 1156.5149m(N289+A1G0M5)	EEQFNSTFR	0.00118406	0.00129743	0.00123754	0.000892397	0.00104679	0.00115888	0.00122082	0.001236	0.00113134	0.00123653	0.00119188	0.00122129	0.00117125	0.0925723
1:Antistreptavidin IgG2 HC	289	N289+A1G0M5F	N-Glycan	1:E285-R293 = 1156.5149m(N289+A1G0M5F)	EEQFNSTFR	0.00108629	0.0010472	0.00104114	0.00103922	0.000948356	0.000994111	0.0010013	0.00102194	0.00101907	0.000942825	0.000981504	0.00101395	0.00101141	0.0407624
1:Antistreptavidin IgG2 HC	289	N289+A1G1	N-Glycan	1:E285-R293 = 1156.5149m(N289+A1G1)	EEQFNSTFR	0.00241719	0.00241132	0.00249423	0.00258891	0.00247792	0.00270055	0.00220658	0.00208808	0.00219161	0.00220534	0.00220106	0.00222568	0.00235071	0.0809409
1:Antistreptavidin IgG2 HC	289	N289+A1G1F	N-Glycan	1:E285-R293 = 1156.5149m(N289+A1G1F)	EEQFNSTFR	0.0349318	0.0337566	0.0340555	0.03562	0.036073	0.0348407	0.0357164	0.0350387	0.035711	0.0376984	0.0373567	0.036198	0.0355831	0.033052
1:Antistreptavidin IgG2 HC	289	N289+A1G1M4	N-Glycan	1:E285-R293 = 1156.5149m(N289+A1G1M4)	EEQFNSTFR	0.00250739	0.00250844	0.00249497	0.00232328	0.00246051	0.00257962	0.00201048	0.00206865	0.00200495	0.00192218	0.00195873	0.00203753	0.00223973	0.115638
1:Antistreptavidin IgG2 HC	289	N289+A1G1M4F	N-Glycan	1:E285-R293 = 1156.5149m(N289+A1G1M4F)	EEQFNSTFR	0.00944982	0.00935714	0.00956192	0.00987993	0.0091974	0.00946498	0.0099104	0.00971075	0.00936672	0.00966893	0.00941465	0.00954628	0.00954408	0.0225422
1:Antistreptavidin IgG2 HC	289	N289+A1G1M5	N-Glycan	1:E285-R293 = 1156.5149m(N289+A1G1M5)	EEQFNSTFR	0.00703842	0.00748033	0.00722844	0.00512405	0.00624045	0.00718843	0.00745765	0.00772398	0.00702065	0.00710258	0.00723237	0.00720437	0.00700348	0.0987015
1:Antistreptavidin IgG2 HC	289	N289+A1G1M5F	N-Glycan	1:E285-R293 = 1156.5149m(N289+A1G1M5F)	EEQFNSTFR	0.00871723	0.00981452	0.00934359	0.00857367	0.00789837	0.0093761	0.00941238	0.00935117	0.00928673	0.00873891	0.008766	0.00901228	0.00902425	0.0567978
1:Antistreptavidin IgG2 HC	289	N289+A1S1	N-Glycan	1:E285-R293 = 1156.5149m(N289+A1S1)	EEQFNSTFR	0.000318831	0.00036774	0.000309751	0.000305857	0.000340213	0.000264133	0.000347999	0.000350737	0.000352365	0.000319666	0.000342172	0.000338549	0.000329834	0.0846082
1:Antistreptavidin IgG2 HC	289	N289+A1S1F	N-Glycan	1:E285-R293 = 1156.5149m(N289+A1S1F)	EEQFNSTFR	0.00711267	0.00746582	0.00724191	0.0070111	0.00735102	0.00659368	0.00726457	0.00758363	0.00737103	0.00685412	0.00705253	0.007312	0.00718451	0.0384127
1:Antistreptavidin IgG2 HC	289	N289+A1S1M4	N-Glycan	1:E285-R293 = 1156.5149m(N289+A1S1M4)	EEQFNSTFR	0.000817393	0.000859775	0.000848085	0.000746882	0.000732831	0.000715795	0.00102848	0.00105476	0.00103043	0.000983988	0.00109492	0.00104709	0.000913369	0.154295
1:Antistreptavidin IgG2 HC	289	N289+A1S1M4F	N-Glycan	1:E285-R293 = 1156.5149m(N289+A1S1M4F)	EEQFNSTFR	0.00520181	0.00553778	0.00532085	0.00527076	0.00498045	0.0047007	0.00749188	0.00788268	0.00764847	0.00701493	0.00762665	0.00750809	0.00634875	0.198954
1:Antistreptavidin IgG2 HC	289	N289+A1S1M5	N-Glycan	1:E285-R293 = 1156.5149m(N289+A1S1M5)	EEQFNSTFR	0.00155922	0.00161451	0.001532	0.00155872	0.00151228	0.00149381	0.00212353	0.00213913	0.0021106	0.00200274	0.00200639	0.00204904	0.0018085	0.154606
1:Antistreptavidin IgG2 HC	289	N289+A1S1M5F	N-Glycan	1:E285-R293 = 1156.5149m(N289+A1S1M5F)	EEQFNSTFR	0.00287923	0.00300657	0.00292272	0.00268796	0.00266982	0.00246313	0.00424545	0.00459828	0.00453542	0.00418772	0.00417924	0.00431074	0.00355719	0.236302
1:Antistreptavidin IgG2 HC	289	N289+A2G0	N-Glycan	1:E285-R293 = 1156.5149m(N289+A2G0)	EEQFNSTFR	0.0152115	0.0152999	0.0146128	0.015179	0.0142776	0.015961	0.011068	0.0110782	0.0104037	0.0113437	0.01082	0.0107007	0.0129963	0.171863
1:Antistreptavidin IgG2 HC	289	N289+A2G0F	N-Glycan	1:E285-R293 = 1156.5149m(N289+A2G0F)	EEQFNSTFR	0.39671	0.391472	0.400568	0.407168	0.414782	0.404724	0.369833	0.36707	0.372887	0.37227	0.37397	0.370794	0.386854	0.0449847
1:Antistreptavidin IgG2 HC	289	N289+A2G1	N-Glycan	1:E285-R293 = 1156.5149m(N289+A2G1)	EEQFNSTFR	0.00840871	0.00868301	0.00857732	0.00861028	0.00785547	0.00883104	0.00675134	0.0068111	0.00660123	0.00643443	0.00627718	0.00670232	0.00754529	0.136111
1:Antistreptavidin IgG2 HC	289	N289+A2G1F	N-Glycan	1:E285-R293 = 1156.5149m(N289+A2G1F)	EEQFNSTFR	0.32489	0.322002	0.317572	0.324994	0.314635	0.310304	0.332034	0.32981	0.330104	0.330657	0.332006	0.326727	0.324645	0.02215
1:Antistreptavidin IgG2 HC	289	N289+A2G2	N-Glycan	1:E285-R293 = 1156.5149m(N289+A2G2)	EEQFNSTFR	0.00114277	0.00112174	0.0011792	0.00102841	0.000906407	0.00110582	0.000818633	0.000866964	0.000885085	0.00084287	0.000860129	0.000871631	0.000969138	0.139544
1:Antistreptavidin IgG2 HC	289	N289+A2G2F	N-Glycan	1:E285-R293 = 1156.5149m(N289+A2G2F)	EEQFNSTFR	0.054613	0.0565602	0.0557957	0.0506952	0.0491179	0.0535853	0.0612597	0.0632374	0.0626854	0.0606239	0.0591141	0.063185	0.0575394	0.0849182
1:Antistreptavidin IgG2 HC	289	N289+A2S1G0F	N-Glycan	1:E285-R293 = 1156.5149m(N289+A2S1G0F)	EEQFNSTFR	0.00164658	0.00176809	0.00172208	0.0017577	0.00156159	0.00144019	0.00209837	0.00214589	0.00202799	0.00193586	0.00196419	0.00206947	0.00184483	0.123745
1:Antistreptavidin IgG2 HC	289	N289+A2S1G1F	N-Glycan	1:E285-R293 = 1156.5149m(N289+A2S1G1F)	EEQFNSTFR	0.00218384	0.00220258	0.00217989	0.00217363	0.002066	0.00186954	0.00316374	0.00333988	0.00319521	0.003107	0.0031892	0.00327564	0.00266218	0.219086
1:Antistreptavidin IgG2 HC	289	N289+A2S2F	N-Glycan	1:E285-R293 = 1156.5149m(N289+A2S2F)	EEQFNSTFR	0.000419808	0.000477738	0.000462048	0.000279272	0.000270811	0.000278814	0.000979341	0.00100082	0.00103112	0.000910962	0.000984679	0.000999229	0.000674553	0.491397
1:Antistreptavidin IgG2 HC	289	N289+A3G1F	N-Glycan	1:E285-R293 = 1156.5149m(N289+A3G1F)	EEQFNSTFR	0.000901095	0.000946687	0.000980204	0.000692504	0.00076926	0.000850431	0.0011064	0.00107936	0.00114088	0.0010622	0.00112542	0.00105533	0.000975814	0.150196
1:Antistreptavidin IgG2 HC	289	N289+A3G2F	N-Glycan	1:E285-R293 = 1156.5149m(N289+A3G2F)	EEQFNSTFR	0.000383951	0.000433367	0.000372189	0.000193187	0.000269577	0.000302027	0.000602977	0.000609074	0.000530405	0.000541218	0.000592145	0.000550313	0.000448369	0.318852
1:Antistreptavidin IgG2 HC	289	N289+Deamidation	+Deamidation	1:E285-R293 = 1156.5149m(N289+Deamidation)	EEQFNSTFR	0.00516138	0.00549987	0.00528865	0.00663002	0.00674553	0.00650081	0.0023627	0.00237786	0.00232317	0.00243726	0.00241537	0.00251791	0.00418838	0.459909
1:Antistreptavidin IgG2 HC	289	N289+Gn	N-Glycan	1:E285-R293 = 1156.5149m(N289+Gn)	EEQFNSTFR	0.000385409	0.000384851	0.000390559	0.000405049	0.000430529	0.000444313	0.000206309	0.000214618	0.000226782	0.000211787	0.00021102	0.000242241	0.000312789	0.319844
1:Antistreptavidin IgG2 HC	289	N289+M5	N-Glycan	1:E285-R293 = 1156.5149m(N289+M5)	EEQFNSTFR	0.0459085	0.0476503	0.0465559	0.0370493	0.0396282	0.0449535	0.0657768	0.0670712	0.0639993	0.0648758	0.0641763	0.0663479	0.0544994	0.215534
1:Antistreptavidin IgG2 HC	289	N289+M6	N-Glycan	1:E285-R293 = 1156.5149m(N289+M6)	EEQFNSTFR	0.0134827	0.0141075	0.0141021	0.0102648	0.0133592	0.0141518	0.0155687	0.0156266	0.0153628	0.0152375	0.0150348	0.0157438	0.0143369	0.10707
1:Antistreptavidin IgG2 HC	289	N289+M7	N-Glycan	1:E285-R293 = 1156.5149m(N289+M7)	EEQFNSTFR	0.00605854	0.00646614	0.00636	0.00648673	0.0055729	0.00629966	0.00790717	0.0080693	0.00786096	0.00798523	0.00774868	0.00818827	0.00708363	0.134185
1:Antistreptavidin IgG2 HC	289	N289+M8	N-Glycan	1:E285-R293 = 1156.5149m(N289+M8)	EEQFNSTFR	0.00645632	0.00702919	0.00703663	0.00679823	0.00593714	0.00663938	0.00906823	0.00936238	0.00914701	0.00921725	0.00896549	0.00939976	0.00792142	0.171985
1:Antistreptavidin IgG2 HC	289	N289+M9	N-Glycan	1:E285-R293 = 1156.5149m(N289+M9)	EEQFNSTFR	0.000585244	0.000583462	0.00056185	0.000343826	0.000261261	0.000292772	0.00108947	0.0011132	0.00111286	0.000942696	0.000980478	0.000993172	0.000738358	0.452842
1:Antistreptavidin IgG2 HC	289	N289+Unglycosylated	N-Glycan	1:E285-R293 = 1156.5149m(N289+Unglycosylated)	EEQFNSTFR	0.0149075	0.0157262	0.0152369	0.0198237	0.0208879	0.0200331	0.00603618	0.00621055	0.00606841	0.00631221	0.00628123	0.00637956	0.011992	0.526478
1:Antistreptavidin IgG2 HC	294	V294(V294M)[GTG] (1 base change)	Sequence Variant (1 base change)	1:V294-K309 = 1792.9836m(V294M)	VVSVLTVVHQDWLNGK	5.77822e-05	5.25127e-05	5.78142e-05	7.10724e-05	5.94642e-05	6.12468e-05	5.19351e-05	4.82844e-05	5.31337e-05	6.01334e-05	6.03785e-05	6.23745e-05	5.8011e-05	0.103685
1:Antistreptavidin IgG2 HC	296	S296(S296N)[AGC] (1 base change)	Sequence Variant (1 base change)	1:V294-K309 = 1792.9836m(S296N)	VVSVLTVVHQDWLNGK	0.000177273	0.00016568	0.000178387	0.000228683	0.000209617	0.000227843	0.000149083	0.000130422	0.000153796	0.000179158	0.000184291	0.000194363	0.00018155	0.166477
1:Antistreptavidin IgG2 HC	297	V297(V297A)[GTC] (1 base change)	Sequence Variant (1 base change)	1:V294-K309 = 1792.9836m(V297A)	VVSVLTVVHQDWLNGK	4.49855e-05	4.50867e-05	4.88848e-05	5.03547e-05	5.49951e-05	6.30201e-05	4.26325e-05	4.02267e-05	4.38639e-05	5.57828e-05	5.66491e-05	5.86645e-05	5.04289e-05	0.144376
1:Antistreptavidin IgG2 HC	297	V297(V297I)[GTC] (1 base change)	Sequence Variant (1 base change)	1:V294-K309 = 1792.9836m(V297I)	VVSVLTVVHQDWLNGK	0.000308946	0.000282635	0.000292931	0.000306404	0.000289882	0.0002893	0.000282247	0.000254588	0.000289209	0.000283655	0.000285109	0.00029278	0.00028814	0.0472222
1:Antistreptavidin IgG2 HC	300	V300(V300I)[GTT] (1 base change)	Sequence Variant (1 base change)	1:V294-K309 = 1792.9836m(V300I)	VVSVLTVVHQDWLNGK	0.000146022	0.000148841	0.000144045	0.000133208	0.00013393	0.000142312	0.000128186	0.000112843	0.000130459	0.000140954	0.000137394	0.000148878	0.000137256	0.0755674
1:Antistreptavidin IgG2 HC	302	H302+Double Oxidation	+Double Oxidation	1:V294-K309 = 1792.9836m(H302+Double Oxidation)	VVSVLTVVHQDWLNGK	5.97115e-05	5.75959e-05	5.84972e-05	4.9598e-05	5.68663e-05	4.77086e-05	8.84352e-05	7.68856e-05	8.65178e-05	0.000108978	0.000108216	0.000104563	7.52978e-05	0.30953
1:Antistreptavidin IgG2 HC	302	H302(H302Q)[CAC] (1 base change)	Sequence Variant (1 base change)	1:V294-K309 = 1792.9836m(H302Q)	VVSVLTVVHQDWLNGK	2.01333e-05	1.85568e-05	1.97194e-05	1.31606e-05	1.48732e-05	9.65299e-06	3.09026e-05	2.79041e-05	3.19369e-05	4.10231e-05	3.73195e-05	3.97467e-05	2.54108e-05	0.42562
1:Antistreptavidin IgG2 HC	304	D304+H2O loss	+H2O loss	1:V294-K309 = 1792.9836m(D304+H2O loss)	VVSVLTVVHQDWLNGK	0.00110512	0.00116793	0.00124274	0.000767682	0.00105017	0.00101637	0.00189761	0.00163864	0.0018971	0.00216835	0.00242641	0.00235507	0.0015611	0.368042
1:Antistreptavidin IgG2 HC	305	W305+Double Oxidation	+Double Oxidation	1:V294-K309 = 1792.9836m(W305+Double Oxidation)	VVSVLTVVHQDWLNGK	0.000539018	0.000541978	0.000663714	0.00160798	0.000713447	0.00143098	0.000776567	0.0006043	0.000521819	0.00256932	0.00188582	0.00165852	0.00112612	0.604545
1:Antistreptavidin IgG2 HC	305	W305+Oxidation	+Oxidation	1:V294-K309 = 1792.9836m(W305+Oxidation)	VVSVLTVVHQDWLNGK	0.000231047	0.000248306	0.000243425	0.000313646	0.000230693	0.000329494	0.000228319	0.000197645	0.000269967	0.000295013	0.000273331	0.000292612	0.000262791	0.150388
1:Antistreptavidin IgG2 HC	307	N307+Deamidation	+Deamidation	1:V294-K309 = 1792.9836m(N307+Deamidation)	VVSVLTVVHQDWLNGK	0.00511212	0.00486163	0.00508563	0.00550822	0.00505527	0.00519101	0.00593042	0.00552175	0.00610173	0.00631964	0.00580234	0.00618969	0.00555662	0.0903294
1:Antistreptavidin IgG2 HC	307	N307+NH3 loss	+NH3 loss	1:V294-K309 = 1792.9836m(N307+NH3 loss)	VVSVLTVVHQDWLNGK	0.0247948	0.0238137	0.0256565	0.0258948	0.0242986	0.0227579	0.0315856	0.029763	0.0326108	0.0312069	0.0296362	0.0312968	0.0277763	0.128142
1:Antistreptavidin IgG2 HC	309	K309+Glycation	+Glycation	1:V294-K312 = 2213.1845m(K309+Glycation)	VVSVLTVVHQDWLNGKEYK	0.00258769	0.00270598	0.00292048	0.00308319	0.00245794	0.0034014	0.00209072	0.00203187	0.00218143	0.00238978	0.00235102	0.00236664	0.00254734	0.162924
1:Antistreptavidin IgG2 HC	318	K318+Glycation	+Glycation	1:C313-K326 = 1540.8283m(K318+Glycation)	CKVSNKGLPAPIEK	2.29338e-05	2.87967e-05	2.81642e-05	0.000372079	0.000479218	0.000532452	1.31749e-05	2.05509e-05	1.79958e-05	0.000538697	0.000548951	0.000680083	0.000273591	0.992147
1:Antistreptavidin IgG2 HC	319	G319(G319S)[GGC] (1 base change)	Sequence Variant (1 base change)	1:G319-K326 = 823.48035m(G319S)	GLPAPIEK	7.33437e-05	7.6895e-05	7.92067e-05	7.87472e-05	8.39433e-05	7.76353e-05	4.88618e-05	4.88131e-05	4.75733e-05	5.59629e-05	5.9321e-05	5.28176e-05	6.52601e-05	0.217102
1:Antistreptavidin IgG2 HC	321	P321+Hydroxylation	+Hydroxylation	1:G319-K326 = 823.4804m(P321+Hydroxylation)	GLPAPIEK	0.00213952	0.00233002	0.00219352	0.00218494	0.00222864	0.00221812	0.0014223	0.00153322	0.00151641	0.00166412	0.00180958	0.00171623	0.00191305	0.174386
1:Antistreptavidin IgG2 HC	352	K352+Glycation	+Glycation	1:E348-K362 = 1779.8747m(K352+Glycation)	EEMTKNQVSLTCLVK	0.000674778	0.000694037	0.000708955	0.000656571	0.000616968	0.000597964	0.000505914	0.000514522	0.000540261	0.000555073	0.000505037	0.000497027	0.000588926	0.135158
1:Antistreptavidin IgG2 HC	353	~N353+NH3 loss	+NH3 loss	1:N353-K362 = 1161.6064m(~N353+NH3 loss)	NQVSLTCLVK	0.0011038	0.00107422	0.00109954	0.00104282	0.000997058	0.00104974	0.00068004	0.000700699	0.000749794	0.000685695	0.000651315	0.000626284	0.00087175	0.231428
1:Antistreptavidin IgG2 HC	353	N353(N353K)[AAC] (1 base change)	Sequence Variant (1 base change)	1:N353-K362 = 1161.6064m(N353K)	NQVSLTCLVK	3.18878e-05	2.77489e-05	2.03505e-05	4.20744e-05	4.23853e-05	4.06605e-05	1.77903e-05	1.5232e-05	2.13864e-05	4.46135e-05	5.00738e-05	5.1863e-05	3.38389e-05	0.385679
1:Antistreptavidin IgG2 HC	359	C359(C359Y)[TGC] (1 base change)	Sequence Variant (1 base change)	1:N353-K362 = 1161.6064m(C359Y)	NQVSLTCLVK	0.000141966	0.000141144	0.00014392	0.000109432	0.000131468	0.000141793	9.4879e-05	0.000114429	0.000112056	0.000122328	0.000106763	0.00010687	0.000122254	0.140321
1:Antistreptavidin IgG2 HC	362	K362+Hydroxylation	+Hydroxylation	1:N353-K362 = 1161.6064m(K362+Hydroxylation)	NQVSLTCLVK	6.05143e-05	6.12495e-05	5.99604e-05	6.6611e-05	5.85304e-05	6.71244e-05	3.81892e-05	3.69368e-05	3.8983e-05	4.81118e-05	4.5765e-05	4.92659e-05	5.26035e-05	0.210635
1:Antistreptavidin IgG2 HC	362	K362+Glycation	+Glycation	1:N353-K384 = 3686.7199m(K362+Glycation)	NQVSLTCLVKGFYPSDIAVEWESNGQPENNYK	0.000278016	0.000297051	0.000332214	0.000116708	0.000269613	0.000308035	0.00032277	0.000333567	0.000339865	0.000309108	0.000331621	0.000332062	0.000297552	0.206145
1:Antistreptavidin IgG2 HC	368	D368(D368N)[GAC] (1 base change)	Sequence Variant (1 base change)	1:G363-K384 = 2543.1241m(D368N)	GFYPSDIAVEWESNGQPENNYK	0.000100551	7.66809e-05	7.52749e-05	4.86993e-05	2.75303e-05	6.09912e-05	4.63101e-05	3.66756e-05	5.67102e-05	5.09044e-05	5.32062e-05	7.30026e-05	5.88781e-05	0.338294
1:Antistreptavidin IgG2 HC	370	A370(A370T)[GCC] (1 base change)	Sequence Variant (1 base change)	1:G363-K384 = 2543.1241m(A370T)	GFYPSDIAVEWESNGQPENNYK	6.60293e-05	6.63234e-05	4.45321e-05	0.000107362	9.4027e-05	7.24787e-05	4.54997e-05	4.31603e-05	5.21667e-05	5.69806e-05	5.38291e-05	5.10849e-05	6.27895e-05	0.320718
1:Antistreptavidin IgG2 HC	375	S375(S375N)[AGC] (1 base change)	Sequence Variant (1 base change)	1:G363-K384 = 2543.1241m(S375N)	GFYPSDIAVEWESNGQPENNYK	0.000122868	0.000163963	0.000164388	0.000161828	0.000147072	0.000200086	0.000100444	0.000104374	9.85744e-05	0.000145691	0.000130177	0.000110282	0.000137479	0.230907
1:Antistreptavidin IgG2 HC	376	~N376+Deamidation	+Deamidation	1:G363-K384 = 2543.1241m(~N376+Deamidation)	GFYPSDIAVEWESNGQPENNYK	0.0248847	0.0248027	0.0258021	0.0258295	0.025889	0.0276539	0.019904	0.0203646	0.02068	0.0212914	0.0200159	0.0194169	0.0230446	0.130325
1:Antistreptavidin IgG2 HC	376	~N376+NH3 loss	+NH3 loss	1:G363-K384 = 2543.1241m(~N376+NH3 loss)	GFYPSDIAVEWESNGQPENNYK	0.0180294	0.0180331	0.0182283	0.0177449	0.0181364	0.0190487	0.0119329	0.0118487	0.0120906	0.0122269	0.0119041	0.011869	0.0150911	0.216427
1:Antistreptavidin IgG2 HC	382	~N382+NH3 loss	+NH3 loss	1:G363-K384 = 2543.1241m(~N382+NH3 loss)	GFYPSDIAVEWESNGQPENNYK	0.00525689	0.00506756	0.00505385	0.00521206	0.00524777	0.00588013	0.00330735	0.00326746	0.00339823	0.00353479	0.00345471	0.00348402	0.00434707	0.231125
1:Antistreptavidin IgG2 HC	384	K384+Glycation	+Glycation	1:G363-K401 = 4430.0001m(K384+Glycation)	GFYPSDIAVEWESNGQPENNYKTTPPMLDSDGSFFLYSK	0.000460493	0.000503106	0.000445252	0.000208711	0.000352603	0.000378372	0.000789244	0.000758006	0.000741217	0.00061406	0.000632738	0.000603767	0.000540631	0.332728
1:Antistreptavidin IgG2 HC	389	M389(M389I)[ATG] (1 base change)	Sequence Variant (1 base change)	1:T385-K401 = 1904.8866m(M389I)	TTPPMLDSDGSFFLYSK	0.000157659	0.000145994	0.000156337	0.000147909	0.000180571	0.000142921	8.38288e-05	8.54335e-05	8.70795e-05	8.51107e-05	9.17498e-05	9.04683e-05	0.000121255	0.302944
1:Antistreptavidin IgG2 HC	393	D393+H2O loss	+H2O loss	1:T385-K401 = 1904.8866m(D393+H2O loss)	TTPPMLDSDGSFFLYSK	0.00665542	0.006495	0.00684785	0.00519048	0.00660128	0.00585236	0.004432	0.00454895	0.00460696	0.00399404	0.00452447	0.00465644	0.0053671	0.195708
1:Antistreptavidin IgG2 HC	400	S400(S400N)[AGC] (1 base change)	Sequence Variant (1 base change)	1:T385-K401 = 1904.8866m(S400N)	TTPPMLDSDGSFFLYSK	0.000220171	0.000209016	0.000190756	0.000301566	0.000229314	0.000222511	0.000125713	0.000131357	0.000128908	0.000139828	0.000138864	0.000140187	0.000181516	0.307975
1:Antistreptavidin IgG2 HC	420	M420+Oxidation	+Oxidation	1:W409-K431 = 2801.2439m(M420+Oxidation)	WQQGNVFSCSVMHEALHNHYTQK	0.0152673	0.0152269	0.0156526	0.0163982	0.0177457	0.0120322	0.0111595	0.0119497	0.0121706	0.0148606	0.0130062	0.014911	0.0141984	0.145895
1:Antistreptavidin IgG2 HC	420	M420(M420I)[ATG] (1 base change)	Sequence Variant (1 base change)	1:W409-K431 = 2801.2439m(M420I)	WQQGNVFSCSVMHEALHNHYTQK	0.000355243	0.000352406	0.00035548	0.000437391	0.000361677	0.000336154	0.000320639	0.000325475	0.000326597	0.000418582	0.000374871	0.00043106	0.000366298	0.112697
1:Antistreptavidin IgG2 HC	426	N426+Deamidation	+Deamidation	1:W409-K431 = 2801.2439m(N426+Deamidation)	WQQGNVFSCSVMHEALHNHYTQK	0.00393533	0.00389192	0.00362866	0.00370681	0.00311878	0.00290015	0.00383685	0.00390069	0.0040118	0.00441966	0.00367542	0.00416803	0.00376618	0.11082
1:Antistreptavidin IgG2 HC	426	N426+NH3 loss	+NH3 loss	1:W409-K431 = 2801.2439m(N426+NH3 loss)	WQQGNVFSCSVMHEALHNHYTQK	0.00576596	0.005596	0.0056709	0.00522432	0.0043018	0.00423504	0.00507991	0.0055658	0.00543292	0.00613894	0.00517367	0.00613206	0.00535978	0.113692
1:Antistreptavidin IgG2 HC	436	S436(S436N)[TCT] (2 base change)	Sequence Variant (2 base change)	1:S432-G438 = 659.34901m(S436N)	SLSLSPG	0.000563426	0.000560331	0.00051157	0.000562204	0.000472511	0.000511999	0.000575327	0.000557848	0.000524313	0.000530998	0.000510177	0.000497325	0.000531502	0.0604093
1:Antistreptavidin IgG2 HC	438	G438-58.0054	Unknown Modification	1:S432-G438 = 659.34901m(G438-58.0054)	SLSLSPG	0.00132245	0.00129156	0.00132773	0.00134815	0.00140019	0.00138749	0.000958609	0.000900631	0.000871511	0.00083202	0.00084883	0.000835041	0.00111035	0.22526
1:Antistreptavidin IgG2 HC	438	G438+Lys	+Lys	1:S432-G438 = 659.34901m(G438+Lys)	SLSLSPG	0.0244296	0.024218	0.0250408	0.0324119	0.036593	0.037335	0.019098	0.0189023	0.0188	0.0181462	0.0177397	0.0185601	0.0242729	0.301133
2:Antistreptavidin IgG2 LC	1	Q1+17.0265	N-Terminal Extension	2:Q1-R17 = 1676.8482m(Q1+17.0265)	QSVVTQPPSVSGAPGQR	0.000512437	0.000519847	0.000514896	0.000531895	0.000586853	0.00052383	0.000353962	0.000358286	0.000350525	0.000328863	0.000334887	0.000333642	0.000437494	0.229603
2:Antistreptavidin IgG2 LC	2	S2+N-term clip	N-term Clip	2:S2-R17 = 1565.8162m[nonspecific]	SVVTQPPSVSGAPGQR	0.0081751	0.00800024	0.00812717	0.00856838	0.00935043	0.00862796	0.00467175	0.00463162	0.00467577	0.00452865	0.00465799	0.00460136	0.00655137	0.310949
2:Antistreptavidin IgG2 LC	5	~T5+GalNAc	O-Glycan	2:Q1-R17 = 1676.8482m(~T5+GalNAc)	QSVVTQPPSVSGAPGQR	0.00017332	0.00018525	0.000182243	0.000167043	0.000189752	0.000158117	0.000152643	0.000142878	0.000149669	0.000143818	0.000143952	0.000144943	0.000161136	0.10963
2:Antistreptavidin IgG2 LC	14	P14+Hydroxylation	+Hydroxylation	2:Q1-R17 = 1676.8482m(P14+Hydroxylation)	QSVVTQPPSVSGAPGQR	0.00246866	0.00249565	0.00245205	0.00226991	0.00268267	0.00241804	0.00182224	0.00178532	0.00177833	0.00171526	0.00177401	0.00177956	0.00212014	0.175197
2:Antistreptavidin IgG2 LC	17	R17(R17K)[AGG] (1 base change)	Sequence Variant (1 base change)	2:Q1-R17 = 1676.8482m(R17K)	QSVVTQPPSVSGAPGQR	0.000228354	0.000234327	0.000238693	0.000227273	0.00023544	0.00021652	0.000149119	0.000175643	0.000186535	0.000143672	0.000172418	0.000150316	0.000196526	0.190222
2:Antistreptavidin IgG2 LC	24	G24(G24R)[GGG] (1 base change)	Sequence Variant (1 base change)	2:V18-G24 = 737.3266m(G24R)	VTISCTG	0.000122202	0.000115588	0.000124906	0.0002021	0.000286322	0.000290015	2.37174e-05	2.1812e-05	2.5548e-05	2.99418e-05	3.13867e-05	3.25976e-05	0.000108845	0.932411
2:Antistreptavidin IgG2 LC	28	N28(N28K)[AAC] (1 base change)	Sequence Variant (1 base change)	2:V18-N28 = 1112.4656m(N28K)	VTISCTGSSSN	7.13574e-05	8.50114e-05	8.76741e-05	0.000114432	0.00015389	0.00017661	1.76339e-05	2.17208e-05	1.85096e-05	2.41116e-05	2.38289e-05	2.61258e-05	6.84088e-05	0.821893
2:Antistreptavidin IgG2 LC	30	G30(G30R)[GGG] (1 base change)	Sequence Variant (1 base change)	2:V18-G30 = 1282.5711m(G30R)	VTISCTGSSSNIG	0.000107216	0.000110468	0.000115613	0.000126353	0.000171381	0.000176643	3.36155e-05	3.70767e-05	3.26693e-05	4.01261e-05	4.33914e-05	4.70962e-05	8.68041e-05	0.625876
2:Antistreptavidin IgG2 LC	32	G32+N-term clip	N-term Clip	2:G32-K47 = 1858.9002m[nonspecific]	GYDVHWYQQLPGTAPK	0.000296969	0.000311239	0.000339486	0.000438197	0.000497962	0.000558662	9.06164e-05	8.41541e-05	8.17659e-05	0.000106084	0.00011126	0.000110484	0.00025224	0.703844
2:Antistreptavidin IgG2 LC	36	H36(H36Q)[CAC] (1 base change)	Sequence Variant (1 base change)	2:V18-K47 = 3194.4979m(H36Q)	VTISCTGSSSNIGAGYDVHWYQQLPGTAPK	0.000117694	0.000104045	8.36258e-05	0.00010129	0.00012084	9.72493e-05	8.85521e-05	8.37662e-05	8.83844e-05	0.000102997	0.00010341	0.000113279	0.000100428	0.126144
2:Antistreptavidin IgG2 LC	37	W37+Double Oxidation	+Double Oxidation	2:V18-K47 = 3194.4979m(W37+Double Oxidation)	VTISCTGSSSNIGAGYDVHWYQQLPGTAPK	0.000716946	0.000644614	0.00057927	0.00507756	0.00397855	0.00538275	0.000684839	0.000571729	0.000488621	0.00459163	0.00367491	0.00410498	0.00254137	0.81181
2:Antistreptavidin IgG2 LC	37	W37+Oxidation	+Oxidation	2:V18-K47 = 3194.4979m(W37+Oxidation)	VTISCTGSSSNIGAGYDVHWYQQLPGTAPK	0.000611581	0.000540043	0.000615198	0.000608508	0.000682912	0.000676591	0.000551607	0.000540419	0.0005683	0.000673281	0.000766929	0.000718579	0.000629496	0.117837
2:Antistreptavidin IgG2 LC	48	L48(L48F)[CTC] (1 base change)	Sequence Variant (1 base change)	2:L48-R63 = 1756.9220m(L48F)	LLIYGNSNRPSGVPDR	0.000121247	0.000128552	0.000130619	0.000136968	0.000126276	0.000123066	0.000115497	0.000136005	0.00012915	0.00014469	0.000144781	0.000134687	0.000130962	0.0683693
2:Antistreptavidin IgG2 LC	52	G52(G52D)[GGT] (1 base change)	Sequence Variant (1 base change)	2:L48-R63 = 1756.9220m(G52D)	LLIYGNSNRPSGVPDR	3.20887e-05	3.69785e-05	3.19555e-05	4.09948e-05	3.48484e-05	2.67889e-05	4.86236e-05	6.31889e-05	2.87527e-05	2.67232e-05	8.36815e-05	3.37891e-05	4.07012e-05	0.41867
2:Antistreptavidin IgG2 LC	53	N53(N53K)[AAC] (1 base change)	Sequence Variant (1 base change)	2:L48-N53 = 691.39048m(N53K)	LLIYGN	3.58414e-05	3.70215e-05	3.70864e-05	5.49635e-05	5.21268e-05	5.24883e-05	1.85747e-05	2.18968e-05	2.0688e-05	2.57702e-05	2.56567e-05	2.25336e-05	3.37207e-05	0.395999
2:Antistreptavidin IgG2 LC	53	N53+Deamidation	+Deamidation	2:L48-R63 = 1756.9220m(N53+Deamidation)	LLIYGNSNRPSGVPDR	0.0131442	0.013694	0.0135431	0.0129244	0.0122722	0.0119104	0.0144591	0.0155034	0.0142807	0.016174	0.015836	0.0145892	0.0140276	0.0973866
2:Antistreptavidin IgG2 LC	54	~S54+GalNAc-3SG	O-Glycan	2:L48-R63 = 1756.9220m(~S54+GalNAc-3SG)	LLIYGNSNRPSGVPDR	0.000206416	0.000218056	0.000217374	0.000152331	0.000145643	0.000142933	0.000312522	0.000340318	0.000318975	0.000315506	0.000321631	0.000301075	0.000249398	0.307578
2:Antistreptavidin IgG2 LC	59	G59(G59E)[GGG] (1 base change)	Sequence Variant (1 base change)	2:L48-R63 = 1756.9220m(G59E)	LLIYGNSNRPSGVPDR	4.79889e-05	5.18317e-05	4.94782e-05	5.1011e-05	5.06352e-05	4.70713e-05	4.02161e-05	4.95197e-05	4.653e-05	5.00457e-05	5.23345e-05	4.6381e-05	4.85869e-05	0.0680524
2:Antistreptavidin IgG2 LC	83	E83(E83K)[GAG] (1 base change)	Sequence Variant (1 base change)	2:S69-E83 = 1404.7096m(E83K)	SGTSASLAITGLQAE	0.000501545	0.000504352	0.000487077	0.000793458	0.000430396	0.000509441	0.00010053	9.07788e-05	9.4771e-05	0.000118394	9.93376e-05	0.000103504	0.000319465	0.763684
2:Antistreptavidin IgG2 LC	98	S98+N-term clip	N-term Clip	2:S98-K108 = 1128.5815m[nonspecific]	SGLYVFGTGTK	0.018051	0.0172824	0.0167342	0.0628292	0.0365717	0.0430483	0.00395424	0.00332872	0.0036966	0.00804836	0.00713208	0.00678701	0.0189553	0.997568
2:Antistreptavidin IgG2 LC	100	L100+N-term clip	N-term Clip	2:L100-K108 = 984.5280m[nonspecific]	LYVFGTGTK	0.000248757	0.000220644	0.000233481	0.00121075	0.000740058	0.000735492	3.91619e-05	3.85901e-05	3.8501e-05	0.000137588	0.00010318	0.000112069	0.000321523	1.15833
2:Antistreptavidin IgG2 LC	108	K108+Glycation	+Glycation	2:S69-K116 = 5035.3808m(K108+Glycation)	SGTSASLAITGLQAEDEADYYCQSYDSSLSGLYVFGTGTKVTVLGQPK	0.00612169	0.0058852	0.00700645	0.00632006	0.00735874	0.0068667	0.00403139	0.00422381	0.00410048	0.00539343	0.00556721	0.00652975	0.00578374	0.199558
2:Antistreptavidin IgG2 LC	109	V109(V109I)[GTC] (1 base change)	Sequence Variant (1 base change)	2:V109-K116 = 840.5069m(V109I)	VTVLGQPK	0.000116855	0.000109249	0.000111028	0.000117738	0.000128989	0.000119258	6.49437e-05	6.59529e-05	6.70675e-05	6.68862e-05	6.58612e-05	6.65993e-05	9.17023e-05	0.294838
2:Antistreptavidin IgG2 LC	111	V111(V111A)[GTC] (1 base change)	Sequence Variant (1 base change)	2:V109-K116 = 840.5069m(V111A)	VTVLGQPK	3.54938e-05	3.39369e-05	3.41398e-05	3.48978e-05	3.61506e-05	3.65445e-05	2.05327e-05	1.87919e-05	1.95198e-05	1.89583e-05	2.01166e-05	1.89781e-05	2.73384e-05	0.301761
2:Antistreptavidin IgG2 LC	111	V111(V111I)[GTC] (1 base change)	Sequence Variant (1 base change)	2:V109-K116 = 840.5069m(V111I)	VTVLGQPK	0.000246777	0.000250063	0.000250348	0.000254213	0.000249651	0.000247829	0.000151621	0.000149284	0.000145329	0.000134156	0.000136267	0.000134729	0.000195856	0.289132
2:Antistreptavidin IgG2 LC	114	Q114+Deamidation	+Deamidation	2:V109-K116 = 840.5069m(Q114+Deamidation)	VTVLGQPK	0.000774172	0.000768123	0.000771873	0.00081727	0.000872201	0.000877344	0.000419602	0.000421366	0.000387646	0.000401463	0.000418441	0.000435905	0.000613784	0.344892
2:Antistreptavidin IgG2 LC	144	D144+H2O loss	+H2O loss	2:A136-K155 = 2211.1286m(D144+H2O loss)	ATLVCLISDFYPGAVTVAWK	9.58393e-05	0.000102025	9.7891e-05	8.58041e-05	9.52299e-05	8.33218e-05	4.76018e-05	6.09115e-05	6.12549e-05	5.96101e-05	6.24013e-05	5.96558e-05	7.59622e-05	0.252346
2:Antistreptavidin IgG2 LC	144	D144(D144G)[GAC] (1 base change)	Sequence Variant (1 base change)	2:A136-K155 = 2211.1286m(D144G)	ATLVCLISDFYPGAVTVAWK	0.00354125	0.00344535	0.003018	0.00205881	0.0022132	0.00195274	0.00233454	0.00211707	0.00191586	0.00115799	0.00130702	0.00130587	0.00219731	0.360143
2:Antistreptavidin IgG2 LC	154	W154+Double Oxidation	+Double Oxidation	2:A136-K155 = 2211.1286m(W154+Double Oxidation)	ATLVCLISDFYPGAVTVAWK	0.00236581	0.00424682	0.00407425	0.00623383	0.00424379	0.00580983	0.00322287	0.00314442	0.00137471	0.0219677	0.0135976	0.0128494	0.00692759	0.880962
2:Antistreptavidin IgG2 LC	154	W154+Oxidation	+Oxidation	2:A136-K155 = 2211.1286m(W154+Oxidation)	ATLVCLISDFYPGAVTVAWK	0.000548708	0.000610302	0.000624664	0.000637232	0.000550227	0.000558958	0.000521563	0.000512553	0.000523568	0.000759634	0.000690368	0.000619329	0.000596425	0.126286
2:Antistreptavidin IgG2 LC	154	W154+Oxidation to kynurenine	+Oxidation to kynurenine	2:A136-K155 = 2211.1286m(W154+Oxidation to kynurenine)	ATLVCLISDFYPGAVTVAWK	0.000331096	0.000548399	0.00068023	0.000361557	0.000299435	0.000329922	0.000283807	0.000256822	0.000133054	0.00114755	0.000793618	0.00088015	0.000503803	0.61093
2:Antistreptavidin IgG2 LC	155	K155+Glycation	+Glycation	2:A136-K162 = 2895.4728m(K155+Glycation)	ATLVCLISDFYPGAVTVAWKADSSPVK	0.0329961	0.0337866	0.0359824	0.0291274	0.0320611	0.0242814	0.0451993	0.0472115	0.0477204	0.0481218	0.0478624	0.0475325	0.0393236	0.223515
2:Antistreptavidin IgG2 LC	162	K162+Glycation	+Glycation	2:A156-K172 = 1673.8472m(K162+Glycation)	ADSSPVKAGVETTTPSK	0.00133486	0.00134838	0.0011992	0.000842655	0.00118109	0.00118308	0.000599828	0.000472526	0.000596846	0.00068207	0.000685469	0.000728123	0.000904511	0.354294
2:Antistreptavidin IgG2 LC	164	G164(G164E)[GGA] (1 base change)	Sequence Variant (1 base change)	2:A163-K172 = 989.5029m(G164E)	AGVETTTPSK	0.000112017	0.000111404	0.000114428	9.01501e-05	8.12812e-05	8.09204e-05	6.58222e-05	6.25871e-05	6.37127e-05	5.71493e-05	5.10054e-05	5.12711e-05	7.8479e-05	0.303295
2:Antistreptavidin IgG2 LC	165	V165(V165M)[GTG] (1 base change)	Sequence Variant (1 base change)	2:A163-K172 = 989.5029m(V165M)	AGVETTTPSK	5.15807e-05	4.8677e-05	5.46921e-05	5.43151e-05	4.84433e-05	5.00828e-05	3.06125e-05	2.93351e-05	3.11762e-05	3.81256e-05	3.03597e-05	3.15967e-05	4.15831e-05	0.253245
2:Antistreptavidin IgG2 LC	177	K177+Glycation	+Glycation	2:Q173-K192 = 2314.1230m(K177+Glycation)	QSNNKYAASSYLSLTPEQWK	0.00181894	0.00186171	0.00197459	0.00214636	0.00191338	0.00223495	0.00115972	0.00116532	0.00125331	0.00149051	0.00146917	0.00146867	0.00166305	0.226317
2:Antistreptavidin IgG2 LC	185	S185(S185R)[AGC] (1 base change)	Sequence Variant (1 base change)	2:Y178-S185 = 860.3916m(S185R)	YAASSYLS	0.000268879	0.000299249	0.000308095	0.000390404	0.000463979	0.000436758	0.000152205	0.000143732	0.000143239	0.000181126	0.00019937	0.000183097	0.000264178	0.439314
2:Antistreptavidin IgG2 LC	185	S185(S185N)[AGC] (1 base change)	Sequence Variant (1 base change)	2:Y178-K192 = 1742.8516m(S185N)	YAASSYLSLTPEQWK	0.000590479	0.000597825	0.000640287	0.000646552	0.000640449	0.00066325	0.000397644	0.000413194	0.000441056	0.000489742	0.000470042	0.000486054	0.000539715	0.184479
2:Antistreptavidin IgG2 LC	191	W191+Double Oxidation	+Double Oxidation	2:Y178-K192 = 1742.8516m(W191+Double Oxidation)	YAASSYLSLTPEQWK	0.000380587	0.000252634	0.00033272	0.00337852	0.00196877	0.00282875	0.000410048	0.000335739	0.000348497	0.00333975	0.00241803	0.00255782	0.00154599	0.847335
2:Antistreptavidin IgG2 LC	191	W191+Oxidation	+Oxidation	2:Y178-K192 = 1742.8516m(W191+Oxidation)	YAASSYLSLTPEQWK	0.000468001	0.000452453	0.000488206	0.000777947	0.000677854	0.000809374	0.000318529	0.000324705	0.000381455	0.000572004	0.000489441	0.000536509	0.000524707	0.306789
2:Antistreptavidin IgG2 LC	192	K192+Glycation	+Glycation	2:Y178-R195 = 2123.0436m(K192+Glycation)	YAASSYLSLTPEQWKSHR	0.00418592	0.00444401	0.0045362	0.00503482	0.00457739	0.00482134	0.00139727	0.00147156	0.00154777	0.00180291	0.00172505	0.00169751	0.00310348	0.508896
2:Antistreptavidin IgG2 LC	196	S196(S196N)[AGC] (1 base change)	Sequence Variant (1 base change)	2:S196-K210 = 1711.7359m(S196N)	SYSCQVTHEGSTVEK	6.01398e-05	6.72475e-05	4.72608e-05	6.40145e-05	9.02888e-05	5.56115e-05	4.37068e-05	6.13873e-05	6.55962e-05	9.72856e-05	7.32042e-05	6.77012e-05	6.61203e-05	0.23433
2:Antistreptavidin IgG2 LC	198	S198(S198N)[AGC] (1 base change)	Sequence Variant (1 base change)	2:S196-K210 = 1711.7359m(S198N)	SYSCQVTHEGSTVEK	0.000483994	0.000471346	0.00050323	0.000588836	0.000549629	0.000520035	0.000410974	0.000452901	0.000476075	0.000615154	0.000623147	0.00065665	0.000529331	0.145447
2:Antistreptavidin IgG2 LC	201	V201(V201I)[GTC] (1 base change)	Sequence Variant (1 base change)	2:S196-K210 = 1711.7359m(V201I)	SYSCQVTHEGSTVEK	9.81415e-05	9.62036e-05	0.000101424	0.000127254	9.88853e-05	9.45808e-05	8.82026e-05	8.82995e-05	9.14676e-05	0.000121123	0.000129878	0.000133227	0.000105724	0.161123
2:Antistreptavidin IgG2 LC	201	V201(V201M)[GTC] (2 base change)	Sequence Variant (2 base change)	2:S196-K210 = 1711.7359m(V201M)	SYSCQVTHEGSTVEK	6.05107e-05	6.50579e-05	6.11561e-05	8.23073e-05	6.83785e-05	6.63684e-05	5.67858e-05	6.21881e-05	6.43773e-05	9.76327e-05	8.46779e-05	8.64513e-05	7.13243e-05	0.182111
2:Antistreptavidin IgG2 LC	203	H203(H203Q)[CAT] (1 base change)	Sequence Variant (1 base change)	2:S196-K210 = 1711.7359m(H203Q)	SYSCQVTHEGSTVEK	2.85128e-05	2.56565e-05	2.90854e-05	2.08253e-05	2.13682e-05	1.54553e-05	6.05709e-05	6.15256e-05	6.01011e-05	6.47285e-05	8.19531e-05	8.02256e-05	4.5834e-05	0.53628
2:Antistreptavidin IgG2 LC	205	G205(G205D)[GGG] (2 base change)	Sequence Variant (2 base change)	2:S196-K210 = 1711.7359m(G205D)	SYSCQVTHEGSTVEK	7.30534e-05	7.08557e-05	8.04843e-05	9.98371e-05	8.43413e-05	8.75859e-05	8.48491e-05	9.06698e-05	9.62585e-05	0.000124363	0.000120414	0.000132564	9.54397e-05	0.2121
2:Antistreptavidin IgG2 LC	206	S206(S206N)[AGC] (1 base change)	Sequence Variant (1 base change)	2:S196-K210 = 1711.7359m(S206N)	SYSCQVTHEGSTVEK	0.000181525	0.000186788	0.000179667	0.000234878	0.000205033	0.000192049	0.000173227	0.000200788	0.000200061	0.000253067	0.000255568	0.000279178	0.000211819	0.165073
2:Antistreptavidin IgG2 LC	210	K210+Glycation	+Glycation	2:S196-S218 = 2558.0789m(K210+Glycation)	SYSCQVTHEGSTVEKTVAPTECS	0.00118722	0.00120466	0.00122381	0.00107347	0.000899128	0.000784342	0.00223406	0.00258485	0.00255353	0.00308242	0.003221	0.00335169	0.00195002	0.503564
Reference variant abundance
Protein	Residue #	Modification	Category	Modified Peptides	Peptide Sequence	Abundance as Peak Area
1:Antistreptavidin IgG2 HC	1	Q1+17.0265	N-Terminal Extension	1:Q1-R39 = 4113.0266m(Q1+17.0265)	QLQLQESGPGLVKPSGTLSLTCAVSGGSISSGNWWSWVR	0.996467	0.99746	0.997134	0.99796	0.997547	0.997837	0.998733	0.998945	0.999104	0.998764	0.998928	0.998867
1:Antistreptavidin IgG2 HC	13	K13+Glycation	+Glycation	1:Q1-R39 = 4113.0266m(K13+Glycation)	QLQLQESGPGLVKPSGTLSLTCAVSGGSISSGNWWSWVR	0.99975	0.999745	0.999792	0.999787	0.999799	0.999754	0.999772	0.999766	0.999776	0.999689	0.999693	0.999678
1:Antistreptavidin IgG2 HC	30	S30+C-term clip	C-term Clip	1:Q1-S30 = 2954.4907m[nonspecific]	QLQLQESGPGLVKPSGTLSLTCAVSGGSIS	0.998136	0.998089	0.997675	0.999345	0.999048	0.999122	0.999404	0.999397	0.99946	0.999641	0.999658	0.999658
1:Antistreptavidin IgG2 HC	31	S31+N-term clip	N-term Clip	1:S31-R39 = 1176.5465m[nonspecific]	SGNWWSWVR	0.992732	0.99296	0.992917	0.984807	0.988395	0.992573	0.998293	0.998293	0.998399	0.997429	0.997452	0.997489
1:Antistreptavidin IgG2 HC	34	~W34+Double Oxidation	+Double Oxidation	1:Q1-R39 = 4113.0266m(~W34+Double Oxidation)	QLQLQESGPGLVKPSGTLSLTCAVSGGSISSGNWWSWVR	0.993517	0.993857	0.99265	0.993852	0.99186	0.992716	0.994148	0.993983	0.994573	0.992491	0.992523	0.992824
1:Antistreptavidin IgG2 HC	34	~W34+Oxidation to kynurenine	+Oxidation to kynurenine	1:Q1-R39 = 4113.0266m(~W34+Oxidation to kynurenine)	QLQLQESGPGLVKPSGTLSLTCAVSGGSISSGNWWSWVR	0.993517	0.993857	0.99265	0.993852	0.99186	0.992716	0.994148	0.993983	0.994573	0.992491	0.992523	0.992824
1:Antistreptavidin IgG2 HC	37	~W37+Double Oxidation	+Double Oxidation	1:Q1-R39 = 4113.0266m(~W37+Double Oxidation)	QLQLQESGPGLVKPSGTLSLTCAVSGGSISSGNWWSWVR	0.998999	0.99907	0.998692	0.998879	0.998725	0.998734	0.998588	0.998627	0.999075	0.997057	0.997251	0.997923
1:Antistreptavidin IgG2 HC	44	K44+Glycation	+Glycation	1:Q40-K65 = 2809.4035m(K44+Glycation)	QPPGKGLEWIGEISHSGTTNYNPSLK	0.999354	0.999372	0.999338	0.99936	0.999488	0.9994	0.999593	0.999575	0.999587	0.999536	0.999562	0.999493
1:Antistreptavidin IgG2 HC	48	W48+Double Oxidation	+Double Oxidation	1:G45-K65 = 2302.1230m(W48+Double Oxidation)	GLEWIGEISHSGTTNYNPSLK	0.999403	0.999444	0.999475	0.998401	0.999213	0.998783	0.999549	0.99958	0.999591	0.998793	0.999241	0.998964
1:Antistreptavidin IgG2 HC	48	W48+Oxidation	+Oxidation	1:G45-K65 = 2302.1230m(W48+Oxidation)	GLEWIGEISHSGTTNYNPSLK	0.999403	0.999444	0.999475	0.998401	0.999213	0.998783	0.999549	0.99958	0.999591	0.998793	0.999241	0.998964
1:Antistreptavidin IgG2 HC	55	S55+C-term clip	C-term Clip	1:G45-S55 = 1226.5932m[nonspecific]	GLEWIGEISHS	0.999937	0.99992	0.999913	0.999829	0.99983	0.999809	0.999977	0.999981	0.999948	0.999894	0.999895	0.999909
1:Antistreptavidin IgG2 HC	56	G56(G56R)[GGG] (1 base change)	Sequence Variant (1 base change)	1:G45-G56 = 1283.6146m(G56R)	GLEWIGEISHSG	0.999958	0.999955	0.999958	0.99993	0.999928	0.999924	0.999979	0.999981	0.99998	0.99997	0.999974	0.999974
1:Antistreptavidin IgG2 HC	56	G56+N-term clip	N-term Clip	1:G56-K65 = 1093.5404m[nonspecific]	GTTNYNPSLK	0.999814	0.999797	0.999796	0.999795	0.999769	0.999775	0.999884	0.999881	0.99987	0.999862	0.99986	0.999847
1:Antistreptavidin IgG2 HC	59	N59(N59K)[AAC] (1 base change)	Sequence Variant (1 base change)	1:G45-N59 = 1599.7529m(N59K)	GLEWIGEISHSGTTN	0.999917	0.999915	0.999911	0.999897	0.999916	0.9999	0.999965	0.999966	0.999965	0.999954	0.999958	0.999953
1:Antistreptavidin IgG2 HC	65	K65+Glycation	+Glycation	1:G45-R67 = 2545.2561m(K65+Glycation)	GLEWIGEISHSGTTNYNPSLKSR	0.999544	0.999548	0.999545	0.999531	0.999611	0.999531	0.99978	0.999785	0.999777	0.999741	0.999748	0.999744
1:Antistreptavidin IgG2 HC	67	R67(R67Q)[CGA] (1 base change)	Sequence Variant (1 base change)	1:S66-K74 = 961.5193m(R67Q)	SRVTISGDK	0.999841	0.999928	0.999924	0.999925	0.999937	0.99994	0.999927	0.999908	0.999904	0.999428	0.997599	0.998817
1:Antistreptavidin IgG2 HC	68	V68(V68I)[GTC] (1 base change)	Sequence Variant (1 base change)	1:V68-K74 = 718.38612m(V68I)	VTISGDK	0.999819	0.999913	0.999911	0.999898	0.999913	0.999914	0.999924	0.999908	0.999902	0.999499	0.997761	0.998847
1:Antistreptavidin IgG2 HC	107	~T107+GalNAc-3SG	O-Glycan	1:N99-K117 = 2059.9851m(~T107+GalNAc-3SG)	NFDYWGQGTLVTVSSASTK	0.999738	0.999786	0.999778	0.999944	0.999924	0.999954	0.999876	0.999872	0.999872	0.999927	0.999913	0.999954
1:Antistreptavidin IgG2 HC	107	T107+N-term clip	N-term Clip	1:T107-K117 = 1092.6027m[nonspecific]	TLVTVSSASTK	0.999756	0.999749	0.999795	0.999686	0.9997	0.999549	0.999941	0.99994	0.999931	0.999933	0.999934	0.999926
1:Antistreptavidin IgG2 HC	117	K117+Hydroxylation	+Hydroxylation	1:N99-K117 = 2059.9851m(K117+Hydroxylation)	NFDYWGQGTLVTVSSASTK	0.952837	0.95367	0.951875	0.966853	0.958475	0.957034	0.949486	0.94895	0.948733	0.95472	0.953551	0.956415
1:Antistreptavidin IgG2 HC	120	~S120+GalNAc-3SG	O-Glycan	1:G118-R129 = 1287.6282m(~S120+GalNAc-3SG)	GPSVFPLAPCSR	0.999922	0.999915	0.999918	0.999923	0.999918	0.999914	0.999857	0.999854	0.999839	0.999868	0.999861	0.999876
1:Antistreptavidin IgG2 HC	121	V121(V121I)[GTC] (1 base change)	Sequence Variant (1 base change)	1:G118-R129 = 1287.6282m(V121I)	GPSVFPLAPCSR	0.999907	0.999904	0.999915	0.999911	0.999896	0.999905	0.999952	0.999951	0.999948	0.999946	0.999944	0.999949
1:Antistreptavidin IgG2 HC	122	F122(F122Y)[TTC] (1 base change)	Sequence Variant (1 base change)	1:G118-R129 = 1287.6282m(F122Y)	GPSVFPLAPCSR	0.999895	0.999897	0.9999	0.999911	0.999895	0.999901	0.999938	0.999933	0.999931	0.999933	0.999934	0.999934
1:Antistreptavidin IgG2 HC	127	C127+C-term clip	C-term Clip	1:G118-C127 = 1044.4950m[nonspecific]	GPSVFPLAPC	0.999552	0.999576	0.999576	0.999546	0.999208	0.999372	0.999806	0.999792	0.999792	0.999675	0.999696	0.999691
1:Antistreptavidin IgG2 HC	127	C127(C127Y)[TGC] (1 base change)	Sequence Variant (1 base change)	1:G118-R129 = 1287.6282m(C127Y)	GPSVFPLAPCSR	0.999976	0.999975	0.999974	0.999955	0.99995	0.999953	0.999989	0.999988	0.99999	0.999977	0.999978	0.999975
1:Antistreptavidin IgG2 HC	129	R129(R129K)[AGG] (1 base change)	Sequence Variant (1 base change)	1:G118-R129 = 1287.6282m(R129K)	GPSVFPLAPCSR	0.999931	0.999926	0.999931	0.999933	0.999921	0.999916	0.999965	0.999961	0.999959	0.999956	0.999955	0.999956
1:Antistreptavidin IgG2 HC	131	T131+N-term clip	N-term Clip	1:T131-K143 = 1336.6544m[nonspecific]	TSESTAALGCLVK	0.999496	0.999501	0.999482	0.999487	0.999499	0.999551	0.999713	0.999679	0.999706	0.999681	0.999672	0.999672
1:Antistreptavidin IgG2 HC	132	S132+N-term clip	N-term Clip	1:S132-K143 = 1235.6068m[nonspecific]	SESTAALGCLVK	0.997587	0.997502	0.997407	0.997541	0.997596	0.998137	0.998158	0.998034	0.998178	0.997898	0.997838	0.997935
1:Antistreptavidin IgG2 HC	134	S134(S134N)[AGC] (1 base change)	Sequence Variant (1 base change)	1:S130-K143 = 1423.6865m(S134N)	STSESTAALGCLVK	0.999731	0.999721	0.999716	0.999738	0.99974	0.999772	0.999827	0.999818	0.999819	0.999803	0.999782	0.999791
1:Antistreptavidin IgG2 HC	134	S134+N-term clip	N-term Clip	1:S134-K143 = 1019.5321m[nonspecific]	STAALGCLVK	0.997024	0.996975	0.996953	0.996576	0.995931	0.996781	0.998679	0.99854	0.998554	0.998315	0.998254	0.998254
1:Antistreptavidin IgG2 HC	135	T135+N-term clip	N-term Clip	1:T135-K143 = 932.5001m[nonspecific]	TAALGCLVK	0.999492	0.999468	0.999491	0.999362	0.999284	0.999402	0.99977	0.999747	0.999756	0.999709	0.999698	0.999717
1:Antistreptavidin IgG2 HC	136	A136(A136T)[GCG] (1 base change)	Sequence Variant (1 base change)	1:S130-K143 = 1423.6865m(A136T)	STSESTAALGCLVK	0.999973	0.999961	0.999961	0.999961	0.999969	0.999965	0.999975	0.999976	0.999978	0.999972	0.999969	0.999973
1:Antistreptavidin IgG2 HC	140	C140(C140Y)[TGC] (1 base change)	Sequence Variant (1 base change)	1:S130-K143 = 1423.6865m(C140Y)	STSESTAALGCLVK	0.999812	0.999821	0.999823	0.999799	0.999778	0.999792	0.999868	0.999864	0.999866	0.999858	0.999863	0.999855
1:Antistreptavidin IgG2 HC	142	V142(V142I)[GTC] (1 base change)	Sequence Variant (1 base change)	1:S130-K143 = 1423.6865m(V142I)	STSESTAALGCLVK	0.999948	0.99995	0.99995	0.999944	0.999951	0.999946	0.999966	0.999966	0.999966	0.99996	0.999961	0.999958
1:Antistreptavidin IgG2 HC	154	~W154+Double Oxidation	+Double Oxidation	1:D144-K206 = 6763.2341m(~W154+Double Oxidation)	DYFPEPVTVSWNSGALTSGVHTFPAVLQSSGLYSLSSVVTVPSSNFGTQTYTCNVDHKPSNTK	0.983891	0.98327	0.98115	0.979433	0.98266	0.982553	0.985424	0.983369	0.984355	0.981986	0.983529	0.984627
1:Antistreptavidin IgG2 HC	154	W154+Oxidation	+Oxidation	1:D144-K206 = 6763.2341m(W154+Oxidation)	DYFPEPVTVSWNSGALTSGVHTFPAVLQSSGLYSLSSVVTVPSSNFGTQTYTCNVDHKPSNTK	0.983891	0.98327	0.98115	0.979433	0.98266	0.982553	0.985424	0.983369	0.984355	0.981986	0.983529	0.984627
1:Antistreptavidin IgG2 HC	155	N155(N155K)[AAC] (1 base change)	Sequence Variant (1 base change)	1:D144-N155 = 1452.6561m(N155K)	DYFPEPVTVSWN	0.999847	0.999864	0.999865	0.999575	0.999755	0.999822	0.999976	0.999941	0.999948	0.999911	0.999896	0.999905
1:Antistreptavidin IgG2 HC	158	A158+N-term clip	N-term Clip	1:A158-K206 = 5184.5350m[nonspecific]	ALTSGVHTFPAVLQSSGLYSLSSVVTVPSSNFGTQTYTCNVDHKPSNTK	0.999889	0.999902	0.999965	0.999976	0.999903	0.999973	0.999894	0.999915	0.999911	0.999861	0.999838	0.999878
1:Antistreptavidin IgG2 HC	160	T160+C-term clip	C-term Clip	1:D144-T160 = 1881.8785m[nonspecific]	DYFPEPVTVSWNSGALT	0.999881	0.999867	0.99986	0.999713	0.999704	0.999733	0.999939	0.999938	0.999931	0.999821	0.99982	0.99983
1:Antistreptavidin IgG2 HC	161	S161+N-term clip	N-term Clip	1:S161-K206 = 4899.3661m[nonspecific]	SGVHTFPAVLQSSGLYSLSSVVTVPSSNFGTQTYTCNVDHKPSNTK	0.999567	0.999537	0.999588	0.999545	0.999539	0.999597	0.999781	0.999765	0.999788	0.999647	0.999651	0.999716
1:Antistreptavidin IgG2 HC	191	T191+N-term clip	N-term Clip	1:T191-K206 = 1893.8527m[nonspecific]	TQTYTCNVDHKPSNTK	0.9979	0.997711	0.997831	0.992463	0.995707	0.996084	0.999649	0.999613	0.99962	0.999332	0.999337	0.999418
1:Antistreptavidin IgG2 HC	199	D199+H2O loss	+H2O loss	1:D144-K206 = 6763.2341m(D199+H2O loss)	DYFPEPVTVSWNSGALTSGVHTFPAVLQSSGLYSLSSVVTVPSSNFGTQTYTCNVDHKPSNTK	0.993354	0.993857	0.993361	0.992449	0.993943	0.993696	0.99465	0.994	0.994209	0.994563	0.994305	0.994311
1:Antistreptavidin IgG2 HC	238	K238+Glycation	+Glycation	1:C215-K240 = 2911.3305m(K238+Glycation)	CCVECPPCPAPPVAGPSVFLFPPKPK	0.996573	0.996445	0.996549	0.997281	0.997314	0.996775	0.997301	0.997322	0.997196	0.997058	0.996825	0.996985
1:Antistreptavidin IgG2 HC	240	K240+Glycation	+Glycation	1:P239-R247 = 1059.5747m(K240+Glycation)	PKDTLMISR	0.995166	0.99528	0.995153	0.997257	0.996925	0.997521	0.997495	0.997564	0.99748	0.998581	0.998315	0.998868
1:Antistreptavidin IgG2 HC	241	D241+H2O loss	Artifact-Detection	1:D241-R247 = 834.42694m(D241+H2O loss)	DTLMISR	0.994882	0.995797	0.995562	0.996049	0.996482	0.996226	0.980078	0.979837	0.978766	0.977465	0.977231	0.978516
1:Antistreptavidin IgG2 HC	244	M244+Double Oxidation	+Double Oxidation	1:D241-R247 = 834.4269m(M244+Double Oxidation)	DTLMISR	0.964781	0.963836	0.964025	0.964124	0.9634	0.962197	0.967924	0.966084	0.96595	0.957289	0.959054	0.958925
1:Antistreptavidin IgG2 HC	244	M244+Oxidation	+Oxidation	1:D241-R247 = 834.4269m(M244+Oxidation)	DTLMISR	0.964781	0.963836	0.964025	0.964124	0.9634	0.962197	0.967924	0.966084	0.96595	0.957289	0.959054	0.958925
1:Antistreptavidin IgG2 HC	244	M244(M244I)[ATG] (1 base change)	Sequence Variant (1 base change)	1:D241-R247 = 834.4269m(M244I)	DTLMISR	0.964781	0.963836	0.964025	0.964124	0.9634	0.962197	0.967924	0.966084	0.96595	0.957289	0.959054	0.958925
1:Antistreptavidin IgG2 HC	259	S259(S259R)[AGC] (1 base change)	Sequence Variant (1 base change)	1:T248-S259 = 1304.6170m(S259R)	TPEVTCVVVDVS	0.999806	0.999744	0.999766	0.99974	0.999884	0.999823	0.999893	0.9999	0.999884	0.999931	0.999926	0.99993
1:Antistreptavidin IgG2 HC	262	D262+C-term clip	C-term Clip	1:T248-D262 = 1685.7454m[nonspecific]	TPEVTCVVVDVSHED	0.991394	0.988457	0.988169	0.991448	0.995369	0.993285	0.993113	0.992402	0.991747	0.995939	0.995343	0.995079
1:Antistreptavidin IgG2 HC	268	N268(N268K)[AAC] (1 base change)	Sequence Variant (1 base change)	1:T248-N268 = 2400.0791m(N268K)	TPEVTCVVVDVSHEDPEVQFN	0.999517	0.999349	0.999358	0.999037	0.999703	0.999602	0.99912	0.999176	0.998844	0.999434	0.999401	0.999419
1:Antistreptavidin IgG2 HC	269	W269+Double Oxidation	+Double Oxidation	1:T248-K280 = 3797.7519m(W269+Double Oxidation)	TPEVTCVVVDVSHEDPEVQFNWYVDGVEVHNAK	0.999436	0.999335	0.999459	0.999181	0.999627	0.999566	0.999368	0.999392	0.999456	0.997979	0.998415	0.998661
1:Antistreptavidin IgG2 HC	280	~K280+Glycation	+Glycation	1:T248-R284 = 4280.0484m(~K280+Glycation)	TPEVTCVVVDVSHEDPEVQFNWYVDGVEVHNAKTKPR	0.989824	0.986192	0.987722	0.989948	0.993824	0.993838	0.995105	0.994242	0.99428	0.996794	0.996072	0.996345
1:Antistreptavidin IgG2 HC	289	N289+A1G0	N-Glycan	1:E285-R293 = 1156.5149m(N289+A1G0)	EEQFNSTFR	0.39671	0.391472	0.400568	0.407168	0.414782	0.404724	0.369833	0.36707	0.372887	0.37227	0.37397	0.370794
1:Antistreptavidin IgG2 HC	289	N289+A1G0F	N-Glycan	1:E285-R293 = 1156.5149m(N289+A1G0F)	EEQFNSTFR	0.39671	0.391472	0.400568	0.407168	0.414782	0.404724	0.369833	0.36707	0.372887	0.37227	0.37397	0.370794
1:Antistreptavidin IgG2 HC	289	N289+A1G0M4	N-Glycan	1:E285-R293 = 1156.5149m(N289+A1G0M4)	EEQFNSTFR	0.39671	0.391472	0.400568	0.407168	0.414782	0.404724	0.369833	0.36707	0.372887	0.37227	0.37397	0.370794
1:Antistreptavidin IgG2 HC	289	N289+A1G0M5	N-Glycan	1:E285-R293 = 1156.5149m(N289+A1G0M5)	EEQFNSTFR	0.39671	0.391472	0.400568	0.407168	0.414782	0.404724	0.369833	0.36707	0.372887	0.37227	0.37397	0.370794
1:Antistreptavidin IgG2 HC	289	N289+A1G0M5F	N-Glycan	1:E285-R293 = 1156.5149m(N289+A1G0M5F)	EEQFNSTFR	0.39671	0.391472	0.400568	0.407168	0.414782	0.404724	0.369833	0.36707	0.372887	0.37227	0.37397	0.370794
1:Antistreptavidin IgG2 HC	289	N289+A1G1	N-Glycan	1:E285-R293 = 1156.5149m(N289+A1G1)	EEQFNSTFR	0.39671	0.391472	0.400568	0.407168	0.414782	0.404724	0.369833	0.36707	0.372887	0.37227	0.37397	0.370794
1:Antistreptavidin IgG2 HC	289	N289+A1G1F	N-Glycan	1:E285-R293 = 1156.5149m(N289+A1G1F)	EEQFNSTFR	0.39671	0.391472	0.400568	0.407168	0.414782	0.404724	0.369833	0.36707	0.372887	0.37227	0.37397	0.370794
1:Antistreptavidin IgG2 HC	289	N289+A1G1M4	N-Glycan	1:E285-R293 = 1156.5149m(N289+A1G1M4)	EEQFNSTFR	0.39671	0.391472	0.400568	0.407168	0.414782	0.404724	0.369833	0.36707	0.372887	0.37227	0.37397	0.370794
1:Antistreptavidin IgG2 HC	289	N289+A1G1M4F	N-Glycan	1:E285-R293 = 1156.5149m(N289+A1G1M4F)	EEQFNSTFR	0.39671	0.391472	0.400568	0.407168	0.414782	0.404724	0.369833	0.36707	0.372887	0.37227	0.37397	0.370794
1:Antistreptavidin IgG2 HC	289	N289+A1G1M5	N-Glycan	1:E285-R293 = 1156.5149m(N289+A1G1M5)	EEQFNSTFR	0.39671	0.391472	0.400568	0.407168	0.414782	0.404724	0.369833	0.36707	0.372887	0.37227	0.37397	0.370794
1:Antistreptavidin IgG2 HC	289	N289+A1G1M5F	N-Glycan	1:E285-R293 = 1156.5149m(N289+A1G1M5F)	EEQFNSTFR	0.39671	0.391472	0.400568	0.407168	0.414782	0.404724	0.369833	0.36707	0.372887	0.37227	0.37397	0.370794
1:Antistreptavidin IgG2 HC	289	N289+A1S1	N-Glycan	1:E285-R293 = 1156.5149m(N289+A1S1)	EEQFNSTFR	0.39671	0.391472	0.400568	0.407168	0.414782	0.404724	0.369833	0.36707	0.372887	0.37227	0.37397	0.370794
1:Antistreptavidin IgG2 HC	289	N289+A1S1F	N-Glycan	1:E285-R293 = 1156.5149m(N289+A1S1F)	EEQFNSTFR	0.39671	0.391472	0.400568	0.407168	0.414782	0.404724	0.369833	0.36707	0.372887	0.37227	0.37397	0.370794
1:Antistreptavidin IgG2 HC	289	N289+A1S1M4	N-Glycan	1:E285-R293 = 1156.5149m(N289+A1S1M4)	EEQFNSTFR	0.39671	0.391472	0.400568	0.407168	0.414782	0.404724	0.369833	0.36707	0.372887	0.37227	0.37397	0.370794
1:Antistreptavidin IgG2 HC	289	N289+A1S1M4F	N-Glycan	1:E285-R293 = 1156.5149m(N289+A1S1M4F)	EEQFNSTFR	0.39671	0.391472	0.400568	0.407168	0.414782	0.404724	0.369833	0.36707	0.372887	0.37227	0.37397	0.370794
1:Antistreptavidin IgG2 HC	289	N289+A1S1M5	N-Glycan	1:E285-R293 = 1156.5149m(N289+A1S1M5)	EEQFNSTFR	0.39671	0.391472	0.400568	0.407168	0.414782	0.404724	0.369833	0.36707	0.372887	0.37227	0.37397	0.370794
1:Antistreptavidin IgG2 HC	289	N289+A1S1M5F	N-Glycan	1:E285-R293 = 1156.5149m(N289+A1S1M5F)	EEQFNSTFR	0.39671	0.391472	0.400568	0.407168	0.414782	0.404724	0.369833	0.36707	0.372887	0.37227	0.37397	0.370794
1:Antistreptavidin IgG2 HC	289	N289+A2G0	N-Glycan	1:E285-R293 = 1156.5149m(N289+A2G0)	EEQFNSTFR	0.39671	0.391472	0.400568	0.407168	0.414782	0.404724	0.369833	0.36707	0.372887	0.37227	0.37397	0.370794
1:Antistreptavidin IgG2 HC	289	N289+A2G0F	N-Glycan	1:E285-R293 = 1156.5149m(N289+A2G0F)	EEQFNSTFR	0.39671	0.391472	0.400568	0.407168	0.414782	0.404724	0.369833	0.36707	0.372887	0.37227	0.37397	0.370794
1:Antistreptavidin IgG2 HC	289	N289+A2G1	N-Glycan	1:E285-R293 = 1156.5149m(N289+A2G1)	EEQFNSTFR	0.39671	0.391472	0.400568	0.407168	0.414782	0.404724	0.369833	0.36707	0.372887	0.37227	0.37397	0.370794
1:Antistreptavidin IgG2 HC	289	N289+A2G1F	N-Glycan	1:E285-R293 = 1156.5149m(N289+A2G1F)	EEQFNSTFR	0.39671	0.391472	0.400568	0.407168	0.414782	0.404724	0.369833	0.36707	0.372887	0.37227	0.37397	0.370794
1:Antistreptavidin IgG2 HC	289	N289+A2G2	N-Glycan	1:E285-R293 = 1156.5149m(N289+A2G2)	EEQFNSTFR	0.39671	0.391472	0.400568	0.407168	0.414782	0.404724	0.369833	0.36707	0.372887	0.37227	0.37397	0.370794
1:Antistreptavidin IgG2 HC	289	N289+A2G2F	N-Glycan	1:E285-R293 = 1156.5149m(N289+A2G2F)	EEQFNSTFR	0.39671	0.391472	0.400568	0.407168	0.414782	0.404724	0.369833	0.36707	0.372887	0.37227	0.37397	0.370794
1:Antistreptavidin IgG2 HC	289	N289+A2S1G0F	N-Glycan	1:E285-R293 = 1156.5149m(N289+A2S1G0F)	EEQFNSTFR	0.39671	0.391472	0.400568	0.407168	0.414782	0.404724	0.369833	0.36707	0.372887	0.37227	0.37397	0.370794
1:Antistreptavidin IgG2 HC	289	N289+A2S1G1F	N-Glycan	1:E285-R293 = 1156.5149m(N289+A2S1G1F)	EEQFNSTFR	0.39671	0.391472	0.400568	0.407168	0.414782	0.404724	0.369833	0.36707	0.372887	0.37227	0.37397	0.370794
1:Antistreptavidin IgG2 HC	289	N289+A2S2F	N-Glycan	1:E285-R293 = 1156.5149m(N289+A2S2F)	EEQFNSTFR	0.39671	0.391472	0.400568	0.407168	0.414782	0.404724	0.369833	0.36707	0.372887	0.37227	0.37397	0.370794
1:Antistreptavidin IgG2 HC	289	N289+A3G1F	N-Glycan	1:E285-R293 = 1156.5149m(N289+A3G1F)	EEQFNSTFR	0.39671	0.391472	0.400568	0.407168	0.414782	0.404724	0.369833	0.36707	0.372887	0.37227	0.37397	0.370794
1:Antistreptavidin IgG2 HC	289	N289+A3G2F	N-Glycan	1:E285-R293 = 1156.5149m(N289+A3G2F)	EEQFNSTFR	0.39671	0.391472	0.400568	0.407168	0.414782	0.404724	0.369833	0.36707	0.372887	0.37227	0.37397	0.370794
1:Antistreptavidin IgG2 HC	289	N289+Deamidation	+Deamidation	1:E285-R293 = 1156.5149m(N289+Deamidation)	EEQFNSTFR	0.39671	0.391472	0.400568	0.407168	0.414782	0.404724	0.369833	0.36707	0.372887	0.37227	0.37397	0.370794
1:Antistreptavidin IgG2 HC	289	N289+Gn	N-Glycan	1:E285-R293 = 1156.5149m(N289+Gn)	EEQFNSTFR	0.39671	0.391472	0.400568	0.407168	0.414782	0.404724	0.369833	0.36707	0.372887	0.37227	0.37397	0.370794
1:Antistreptavidin IgG2 HC	289	N289+M5	N-Glycan	1:E285-R293 = 1156.5149m(N289+M5)	EEQFNSTFR	0.39671	0.391472	0.400568	0.407168	0.414782	0.404724	0.369833	0.36707	0.372887	0.37227	0.37397	0.370794
1:Antistreptavidin IgG2 HC	289	N289+M6	N-Glycan	1:E285-R293 = 1156.5149m(N289+M6)	EEQFNSTFR	0.39671	0.391472	0.400568	0.407168	0.414782	0.404724	0.369833	0.36707	0.372887	0.37227	0.37397	0.370794
1:Antistreptavidin IgG2 HC	289	N289+M7	N-Glycan	1:E285-R293 = 1156.5149m(N289+M7)	EEQFNSTFR	0.39671	0.391472	0.400568	0.407168	0.414782	0.404724	0.369833	0.36707	0.372887	0.37227	0.37397	0.370794
1:Antistreptavidin IgG2 HC	289	N289+M8	N-Glycan	1:E285-R293 = 1156.5149m(N289+M8)	EEQFNSTFR	0.39671	0.391472	0.400568	0.407168	0.414782	0.404724	0.369833	0.36707	0.372887	0.37227	0.37397	0.370794
1:Antistreptavidin IgG2 HC	289	N289+M9	N-Glycan	1:E285-R293 = 1156.5149m(N289+M9)	EEQFNSTFR	0.39671	0.391472	0.400568	0.407168	0.414782	0.404724	0.369833	0.36707	0.372887	0.37227	0.37397	0.370794
1:Antistreptavidin IgG2 HC	289	N289+Unglycosylated	N-Glycan	1:E285-R293 = 1156.5149m(N289+Unglycosylated)	EEQFNSTFR	0.39671	0.391472	0.400568	0.407168	0.414782	0.404724	0.369833	0.36707	0.372887	0.37227	0.37397	0.370794
1:Antistreptavidin IgG2 HC	294	V294(V294M)[GTG] (1 base change)	Sequence Variant (1 base change)	1:V294-K309 = 1792.9836m(V294M)	VVSVLTVVHQDWLNGK	0.999942	0.999947	0.999942	0.999929	0.999941	0.999939	0.999948	0.999952	0.999947	0.99994	0.99994	0.999938
1:Antistreptavidin IgG2 HC	296	S296(S296N)[AGC] (1 base change)	Sequence Variant (1 base change)	1:V294-K309 = 1792.9836m(S296N)	VVSVLTVVHQDWLNGK	0.999823	0.999834	0.999822	0.999771	0.99979	0.999772	0.999851	0.99987	0.999846	0.999821	0.999816	0.999806
1:Antistreptavidin IgG2 HC	297	V297(V297A)[GTC] (1 base change)	Sequence Variant (1 base change)	1:V294-K309 = 1792.9836m(V297A)	VVSVLTVVHQDWLNGK	0.999646	0.999672	0.999658	0.999643	0.999655	0.999648	0.999675	0.999705	0.999667	0.999661	0.999658	0.999649
1:Antistreptavidin IgG2 HC	297	V297(V297I)[GTC] (1 base change)	Sequence Variant (1 base change)	1:V294-K309 = 1792.9836m(V297I)	VVSVLTVVHQDWLNGK	0.999646	0.999672	0.999658	0.999643	0.999655	0.999648	0.999675	0.999705	0.999667	0.999661	0.999658	0.999649
1:Antistreptavidin IgG2 HC	300	V300(V300I)[GTT] (1 base change)	Sequence Variant (1 base change)	1:V294-K309 = 1792.9836m(V300I)	VVSVLTVVHQDWLNGK	0.999854	0.999851	0.999856	0.999867	0.999866	0.999858	0.999872	0.999887	0.99987	0.999859	0.999863	0.999851
1:Antistreptavidin IgG2 HC	302	H302+Double Oxidation	+Double Oxidation	1:V294-K309 = 1792.9836m(H302+Double Oxidation)	VVSVLTVVHQDWLNGK	0.99992	0.999924	0.999922	0.999937	0.999928	0.999943	0.999881	0.999895	0.999882	0.99985	0.999854	0.999856
1:Antistreptavidin IgG2 HC	302	H302(H302Q)[CAC] (1 base change)	Sequence Variant (1 base change)	1:V294-K309 = 1792.9836m(H302Q)	VVSVLTVVHQDWLNGK	0.99992	0.999924	0.999922	0.999937	0.999928	0.999943	0.999881	0.999895	0.999882	0.99985	0.999854	0.999856
1:Antistreptavidin IgG2 HC	304	D304+H2O loss	+H2O loss	1:V294-K309 = 1792.9836m(D304+H2O loss)	VVSVLTVVHQDWLNGK	0.998895	0.998832	0.998757	0.999232	0.99895	0.998984	0.998102	0.998361	0.998103	0.997832	0.997574	0.997645
1:Antistreptavidin IgG2 HC	305	W305+Double Oxidation	+Double Oxidation	1:V294-K309 = 1792.9836m(W305+Double Oxidation)	VVSVLTVVHQDWLNGK	0.99923	0.99921	0.999093	0.998078	0.999056	0.99824	0.998995	0.999198	0.999208	0.997136	0.997841	0.998049
1:Antistreptavidin IgG2 HC	305	W305+Oxidation	+Oxidation	1:V294-K309 = 1792.9836m(W305+Oxidation)	VVSVLTVVHQDWLNGK	0.99923	0.99921	0.999093	0.998078	0.999056	0.99824	0.998995	0.999198	0.999208	0.997136	0.997841	0.998049
1:Antistreptavidin IgG2 HC	307	N307+Deamidation	+Deamidation	1:V294-K309 = 1792.9836m(N307+Deamidation)	VVSVLTVVHQDWLNGK	0.970093	0.971325	0.969258	0.968597	0.970646	0.972051	0.962484	0.964715	0.961287	0.962473	0.964561	0.962514
1:Antistreptavidin IgG2 HC	307	N307+NH3 loss	+NH3 loss	1:V294-K309 = 1792.9836m(N307+NH3 loss)	VVSVLTVVHQDWLNGK	0.970093	0.971325	0.969258	0.968597	0.970646	0.972051	0.962484	0.964715	0.961287	0.962473	0.964561	0.962514
1:Antistreptavidin IgG2 HC	309	K309+Glycation	+Glycation	1:V294-K312 = 2213.1845m(K309+Glycation)	VVSVLTVVHQDWLNGKEYK	0.997412	0.997294	0.99708	0.996917	0.997542	0.996599	0.997909	0.997968	0.997819	0.99761	0.997649	0.997633
1:Antistreptavidin IgG2 HC	318	K318+Glycation	+Glycation	1:C313-K326 = 1540.8283m(K318+Glycation)	CKVSNKGLPAPIEK	0.999977	0.999971	0.999972	0.999628	0.999521	0.999468	0.999987	0.999979	0.999982	0.999461	0.999451	0.99932
1:Antistreptavidin IgG2 HC	319	G319(G319S)[GGC] (1 base change)	Sequence Variant (1 base change)	1:G319-K326 = 823.48035m(G319S)	GLPAPIEK	0.999927	0.999923	0.999921	0.999921	0.999916	0.999922	0.999951	0.999951	0.999952	0.999944	0.999941	0.999947
1:Antistreptavidin IgG2 HC	321	P321+Hydroxylation	+Hydroxylation	1:G319-K326 = 823.4804m(P321+Hydroxylation)	GLPAPIEK	0.99786	0.99767	0.997806	0.997815	0.997771	0.997782	0.998578	0.998467	0.998484	0.998336	0.99819	0.998284
1:Antistreptavidin IgG2 HC	352	K352+Glycation	+Glycation	1:E348-K362 = 1779.8747m(K352+Glycation)	EEMTKNQVSLTCLVK	0.999325	0.999306	0.999291	0.999343	0.999383	0.999402	0.999494	0.999485	0.99946	0.999445	0.999495	0.999503
1:Antistreptavidin IgG2 HC	353	~N353+NH3 loss	+NH3 loss	1:N353-K362 = 1161.6064m(~N353+NH3 loss)	NQVSLTCLVK	0.998864	0.998898	0.99888	0.998915	0.998961	0.99891	0.999302	0.999284	0.999229	0.99927	0.999299	0.999322
1:Antistreptavidin IgG2 HC	353	N353(N353K)[AAC] (1 base change)	Sequence Variant (1 base change)	1:N353-K362 = 1161.6064m(N353K)	NQVSLTCLVK	0.998864	0.998898	0.99888	0.998915	0.998961	0.99891	0.999302	0.999284	0.999229	0.99927	0.999299	0.999322
1:Antistreptavidin IgG2 HC	359	C359(C359Y)[TGC] (1 base change)	Sequence Variant (1 base change)	1:N353-K362 = 1161.6064m(C359Y)	NQVSLTCLVK	0.999858	0.999859	0.999856	0.999891	0.999869	0.999858	0.999905	0.999886	0.999888	0.999878	0.999893	0.999893
1:Antistreptavidin IgG2 HC	362	K362+Hydroxylation	+Hydroxylation	1:N353-K362 = 1161.6064m(K362+Hydroxylation)	NQVSLTCLVK	0.999661	0.999642	0.999608	0.999817	0.999672	0.999625	0.999639	0.999629	0.999621	0.999643	0.999623	0.999619
1:Antistreptavidin IgG2 HC	362	K362+Glycation	+Glycation	1:N353-K384 = 3686.7199m(K362+Glycation)	NQVSLTCLVKGFYPSDIAVEWESNGQPENNYK	0.999661	0.999642	0.999608	0.999817	0.999672	0.999625	0.999639	0.999629	0.999621	0.999643	0.999623	0.999619
1:Antistreptavidin IgG2 HC	368	D368(D368N)[GAC] (1 base change)	Sequence Variant (1 base change)	1:G363-K384 = 2543.1241m(D368N)	GFYPSDIAVEWESNGQPENNYK	0.999899	0.999923	0.999925	0.999951	0.999972	0.999939	0.999954	0.999963	0.999943	0.999949	0.999947	0.999927
1:Antistreptavidin IgG2 HC	370	A370(A370T)[GCC] (1 base change)	Sequence Variant (1 base change)	1:G363-K384 = 2543.1241m(A370T)	GFYPSDIAVEWESNGQPENNYK	0.999934	0.999934	0.999955	0.999893	0.999906	0.999928	0.999955	0.999957	0.999948	0.999943	0.999946	0.999949
1:Antistreptavidin IgG2 HC	375	S375(S375N)[AGC] (1 base change)	Sequence Variant (1 base change)	1:G363-K384 = 2543.1241m(S375N)	GFYPSDIAVEWESNGQPENNYK	0.999877	0.999836	0.999836	0.999838	0.999853	0.9998	0.9999	0.999896	0.999901	0.999854	0.99987	0.99989
1:Antistreptavidin IgG2 HC	376	~N376+Deamidation	+Deamidation	1:G363-K384 = 2543.1241m(~N376+Deamidation)	GFYPSDIAVEWESNGQPENNYK	0.957086	0.957164	0.95597	0.956426	0.955975	0.953297	0.968163	0.967787	0.967229	0.966482	0.96808	0.968714
1:Antistreptavidin IgG2 HC	376	~N376+NH3 loss	+NH3 loss	1:G363-K384 = 2543.1241m(~N376+NH3 loss)	GFYPSDIAVEWESNGQPENNYK	0.957086	0.957164	0.95597	0.956426	0.955975	0.953297	0.968163	0.967787	0.967229	0.966482	0.96808	0.968714
1:Antistreptavidin IgG2 HC	382	~N382+NH3 loss	+NH3 loss	1:G363-K384 = 2543.1241m(~N382+NH3 loss)	GFYPSDIAVEWESNGQPENNYK	0.994743	0.994932	0.994946	0.994788	0.994752	0.99412	0.996693	0.996733	0.996602	0.996465	0.996545	0.996516
1:Antistreptavidin IgG2 HC	384	K384+Glycation	+Glycation	1:G363-K401 = 4430.0001m(K384+Glycation)	GFYPSDIAVEWESNGQPENNYKTTPPMLDSDGSFFLYSK	0.99954	0.999497	0.999555	0.999791	0.999647	0.999622	0.999211	0.999242	0.999259	0.999386	0.999367	0.999396
1:Antistreptavidin IgG2 HC	389	M389(M389I)[ATG] (1 base change)	Sequence Variant (1 base change)	1:T385-K401 = 1904.8866m(M389I)	TTPPMLDSDGSFFLYSK	0.999842	0.999854	0.999844	0.999852	0.999819	0.999857	0.999916	0.999915	0.999913	0.999915	0.999908	0.99991
1:Antistreptavidin IgG2 HC	393	D393+H2O loss	+H2O loss	1:T385-K401 = 1904.8866m(D393+H2O loss)	TTPPMLDSDGSFFLYSK	0.993345	0.993505	0.993152	0.99481	0.993399	0.994148	0.995568	0.995451	0.995393	0.996006	0.995476	0.995344
1:Antistreptavidin IgG2 HC	400	S400(S400N)[AGC] (1 base change)	Sequence Variant (1 base change)	1:T385-K401 = 1904.8866m(S400N)	TTPPMLDSDGSFFLYSK	0.99978	0.999791	0.999809	0.999698	0.999771	0.999777	0.999874	0.999869	0.999871	0.99986	0.999861	0.99986
1:Antistreptavidin IgG2 HC	420	M420+Oxidation	+Oxidation	1:W409-K431 = 2801.2439m(M420+Oxidation)	WQQGNVFSCSVMHEALHNHYTQK	0.984377	0.984421	0.983992	0.983164	0.981893	0.987632	0.98852	0.987725	0.987503	0.984721	0.986619	0.984658
1:Antistreptavidin IgG2 HC	420	M420(M420I)[ATG] (1 base change)	Sequence Variant (1 base change)	1:W409-K431 = 2801.2439m(M420I)	WQQGNVFSCSVMHEALHNHYTQK	0.984377	0.984421	0.983992	0.983164	0.981893	0.987632	0.98852	0.987725	0.987503	0.984721	0.986619	0.984658
1:Antistreptavidin IgG2 HC	426	N426+Deamidation	+Deamidation	1:W409-K431 = 2801.2439m(N426+Deamidation)	WQQGNVFSCSVMHEALHNHYTQK	0.990299	0.990512	0.9907	0.991069	0.992579	0.992865	0.991083	0.990534	0.990555	0.989441	0.991151	0.9897
1:Antistreptavidin IgG2 HC	426	N426+NH3 loss	+NH3 loss	1:W409-K431 = 2801.2439m(N426+NH3 loss)	WQQGNVFSCSVMHEALHNHYTQK	0.990299	0.990512	0.9907	0.991069	0.992579	0.992865	0.991083	0.990534	0.990555	0.989441	0.991151	0.9897
1:Antistreptavidin IgG2 HC	436	S436(S436N)[TCT] (2 base change)	Sequence Variant (2 base change)	1:S432-G438 = 659.34901m(S436N)	SLSLSPG	0.999437	0.99944	0.999488	0.999438	0.999527	0.999488	0.999425	0.999442	0.999476	0.999469	0.99949	0.999503
1:Antistreptavidin IgG2 HC	438	G438-58.0054	Unknown Modification	1:S432-G438 = 659.34901m(G438-58.0054)	SLSLSPG	0.974248	0.97449	0.973631	0.96624	0.962007	0.961278	0.979943	0.980197	0.980328	0.981022	0.981411	0.980605
1:Antistreptavidin IgG2 HC	438	G438+Lys	+Lys	1:S432-G438 = 659.34901m(G438+Lys)	SLSLSPG	0.974248	0.97449	0.973631	0.96624	0.962007	0.961278	0.979943	0.980197	0.980328	0.981022	0.981411	0.980605
2:Antistreptavidin IgG2 LC	1	Q1+17.0265	N-Terminal Extension	2:Q1-R17 = 1676.8482m(Q1+17.0265)	QSVVTQPPSVSGAPGQR	0.999488	0.99948	0.999485	0.999468	0.999413	0.999476	0.999646	0.999642	0.999649	0.999671	0.999665	0.999666
2:Antistreptavidin IgG2 LC	2	S2+N-term clip	N-term Clip	2:S2-R17 = 1565.8162m[nonspecific]	SVVTQPPSVSGAPGQR	0.991825	0.992	0.991873	0.991432	0.99065	0.991372	0.995328	0.995368	0.995324	0.995471	0.995342	0.995399
2:Antistreptavidin IgG2 LC	5	~T5+GalNAc	O-Glycan	2:Q1-R17 = 1676.8482m(~T5+GalNAc)	QSVVTQPPSVSGAPGQR	0.999827	0.999815	0.999818	0.999833	0.99981	0.999842	0.999847	0.999857	0.99985	0.999856	0.999856	0.999855
2:Antistreptavidin IgG2 LC	14	P14+Hydroxylation	+Hydroxylation	2:Q1-R17 = 1676.8482m(P14+Hydroxylation)	QSVVTQPPSVSGAPGQR	0.997531	0.997504	0.997548	0.99773	0.997317	0.997582	0.998178	0.998215	0.998222	0.998285	0.998226	0.99822
2:Antistreptavidin IgG2 LC	17	R17(R17K)[AGG] (1 base change)	Sequence Variant (1 base change)	2:Q1-R17 = 1676.8482m(R17K)	QSVVTQPPSVSGAPGQR	0.999772	0.999766	0.999761	0.999773	0.999765	0.999783	0.999851	0.999824	0.999813	0.999856	0.999828	0.99985
2:Antistreptavidin IgG2 LC	24	G24(G24R)[GGG] (1 base change)	Sequence Variant (1 base change)	2:V18-G24 = 737.3266m(G24R)	VTISCTG	0.999878	0.999884	0.999875	0.999798	0.999714	0.99971	0.999976	0.999978	0.999974	0.99997	0.999969	0.999967
2:Antistreptavidin IgG2 LC	28	N28(N28K)[AAC] (1 base change)	Sequence Variant (1 base change)	2:V18-N28 = 1112.4656m(N28K)	VTISCTGSSSN	0.999929	0.999915	0.999912	0.999886	0.999846	0.999823	0.999982	0.999978	0.999981	0.999976	0.999976	0.999974
2:Antistreptavidin IgG2 LC	30	G30(G30R)[GGG] (1 base change)	Sequence Variant (1 base change)	2:V18-G30 = 1282.5711m(G30R)	VTISCTGSSSNIG	0.999893	0.99989	0.999884	0.999874	0.999829	0.999823	0.999966	0.999963	0.999967	0.99996	0.999957	0.999953
2:Antistreptavidin IgG2 LC	32	G32+N-term clip	N-term Clip	2:G32-K47 = 1858.9002m[nonspecific]	GYDVHWYQQLPGTAPK	0.999703	0.999689	0.999661	0.999562	0.999502	0.999441	0.999909	0.999916	0.999918	0.999894	0.999889	0.99989
2:Antistreptavidin IgG2 LC	36	H36(H36Q)[CAC] (1 base change)	Sequence Variant (1 base change)	2:V18-K47 = 3194.4979m(H36Q)	VTISCTGSSSNIGAGYDVHWYQQLPGTAPK	0.999882	0.999896	0.999916	0.999899	0.999879	0.999903	0.999911	0.999916	0.999912	0.999897	0.999897	0.999887
2:Antistreptavidin IgG2 LC	37	W37+Double Oxidation	+Double Oxidation	2:V18-K47 = 3194.4979m(W37+Double Oxidation)	VTISCTGSSSNIGAGYDVHWYQQLPGTAPK	0.998671	0.998815	0.998806	0.994314	0.995339	0.993941	0.998764	0.998888	0.998943	0.994735	0.995558	0.995176
2:Antistreptavidin IgG2 LC	37	W37+Oxidation	+Oxidation	2:V18-K47 = 3194.4979m(W37+Oxidation)	VTISCTGSSSNIGAGYDVHWYQQLPGTAPK	0.998671	0.998815	0.998806	0.994314	0.995339	0.993941	0.998764	0.998888	0.998943	0.994735	0.995558	0.995176
2:Antistreptavidin IgG2 LC	48	L48(L48F)[CTC] (1 base change)	Sequence Variant (1 base change)	2:L48-R63 = 1756.9220m(L48F)	LLIYGNSNRPSGVPDR	0.999879	0.999871	0.999869	0.999863	0.999874	0.999877	0.999885	0.999864	0.999871	0.999855	0.999855	0.999865
2:Antistreptavidin IgG2 LC	52	G52(G52D)[GGT] (1 base change)	Sequence Variant (1 base change)	2:L48-R63 = 1756.9220m(G52D)	LLIYGNSNRPSGVPDR	0.999968	0.999963	0.999968	0.999959	0.999965	0.999973	0.999951	0.999937	0.999971	0.999973	0.999916	0.999966
2:Antistreptavidin IgG2 LC	53	N53(N53K)[AAC] (1 base change)	Sequence Variant (1 base change)	2:L48-N53 = 691.39048m(N53K)	LLIYGN	0.98682	0.986269	0.98642	0.987021	0.987676	0.988037	0.985522	0.984475	0.985699	0.9838	0.984138	0.985388
2:Antistreptavidin IgG2 LC	53	N53+Deamidation	+Deamidation	2:L48-R63 = 1756.9220m(N53+Deamidation)	LLIYGNSNRPSGVPDR	0.98682	0.986269	0.98642	0.987021	0.987676	0.988037	0.985522	0.984475	0.985699	0.9838	0.984138	0.985388
2:Antistreptavidin IgG2 LC	54	~S54+GalNAc-3SG	O-Glycan	2:L48-R63 = 1756.9220m(~S54+GalNAc-3SG)	LLIYGNSNRPSGVPDR	0.999794	0.999782	0.999783	0.999848	0.999854	0.999857	0.999687	0.99966	0.999681	0.999684	0.999678	0.999699
2:Antistreptavidin IgG2 LC	59	G59(G59E)[GGG] (1 base change)	Sequence Variant (1 base change)	2:L48-R63 = 1756.9220m(G59E)	LLIYGNSNRPSGVPDR	0.999952	0.999948	0.999951	0.999949	0.999949	0.999953	0.99996	0.99995	0.999953	0.99995	0.999948	0.999954
2:Antistreptavidin IgG2 LC	83	E83(E83K)[GAG] (1 base change)	Sequence Variant (1 base change)	2:S69-E83 = 1404.7096m(E83K)	SGTSASLAITGLQAE	0.999498	0.999496	0.999513	0.999207	0.99957	0.999491	0.999899	0.999909	0.999905	0.999882	0.999901	0.999896
2:Antistreptavidin IgG2 LC	98	S98+N-term clip	N-term Clip	2:S98-K108 = 1128.5815m[nonspecific]	SGLYVFGTGTK	0.981949	0.982718	0.983266	0.937171	0.963428	0.956952	0.996046	0.996671	0.996303	0.991952	0.992868	0.993213
2:Antistreptavidin IgG2 LC	100	L100+N-term clip	N-term Clip	2:L100-K108 = 984.5280m[nonspecific]	LYVFGTGTK	0.999751	0.999779	0.999767	0.998789	0.99926	0.999265	0.999961	0.999961	0.999961	0.999862	0.999897	0.999888
2:Antistreptavidin IgG2 LC	108	K108+Glycation	+Glycation	2:S69-K116 = 5035.3808m(K108+Glycation)	SGTSASLAITGLQAEDEADYYCQSYDSSLSGLYVFGTGTKVTVLGQPK	0.993878	0.994115	0.992994	0.99368	0.992641	0.993133	0.995969	0.995776	0.9959	0.994607	0.994433	0.99347
2:Antistreptavidin IgG2 LC	109	V109(V109I)[GTC] (1 base change)	Sequence Variant (1 base change)	2:V109-K116 = 840.5069m(V109I)	VTVLGQPK	0.999883	0.999891	0.999889	0.999882	0.999871	0.999881	0.999935	0.999934	0.999933	0.999933	0.999934	0.999933
2:Antistreptavidin IgG2 LC	111	V111(V111A)[GTC] (1 base change)	Sequence Variant (1 base change)	2:V109-K116 = 840.5069m(V111A)	VTVLGQPK	0.999718	0.999716	0.999716	0.999711	0.999714	0.999716	0.999828	0.999832	0.999835	0.999847	0.999844	0.999846
2:Antistreptavidin IgG2 LC	111	V111(V111I)[GTC] (1 base change)	Sequence Variant (1 base change)	2:V109-K116 = 840.5069m(V111I)	VTVLGQPK	0.999718	0.999716	0.999716	0.999711	0.999714	0.999716	0.999828	0.999832	0.999835	0.999847	0.999844	0.999846
2:Antistreptavidin IgG2 LC	114	Q114+Deamidation	+Deamidation	2:V109-K116 = 840.5069m(Q114+Deamidation)	VTVLGQPK	0.999226	0.999232	0.999228	0.999183	0.999128	0.999123	0.99958	0.999579	0.999612	0.999599	0.999582	0.999564
2:Antistreptavidin IgG2 LC	144	D144+H2O loss	+H2O loss	2:A136-K155 = 2211.1286m(D144+H2O loss)	ATLVCLISDFYPGAVTVAWK	0.996363	0.996453	0.996884	0.997855	0.997692	0.997964	0.997618	0.997822	0.998023	0.998782	0.998631	0.998634
2:Antistreptavidin IgG2 LC	144	D144(D144G)[GAC] (1 base change)	Sequence Variant (1 base change)	2:A136-K155 = 2211.1286m(D144G)	ATLVCLISDFYPGAVTVAWK	0.996363	0.996453	0.996884	0.997855	0.997692	0.997964	0.997618	0.997822	0.998023	0.998782	0.998631	0.998634
2:Antistreptavidin IgG2 LC	154	W154+Double Oxidation	+Double Oxidation	2:A136-K155 = 2211.1286m(W154+Double Oxidation)	ATLVCLISDFYPGAVTVAWK	0.996754	0.994594	0.994621	0.992767	0.994907	0.993301	0.995972	0.996086	0.997969	0.976125	0.984918	0.985651
2:Antistreptavidin IgG2 LC	154	W154+Oxidation	+Oxidation	2:A136-K155 = 2211.1286m(W154+Oxidation)	ATLVCLISDFYPGAVTVAWK	0.996754	0.994594	0.994621	0.992767	0.994907	0.993301	0.995972	0.996086	0.997969	0.976125	0.984918	0.985651
2:Antistreptavidin IgG2 LC	154	W154+Oxidation to kynurenine	+Oxidation to kynurenine	2:A136-K155 = 2211.1286m(W154+Oxidation to kynurenine)	ATLVCLISDFYPGAVTVAWK	0.996754	0.994594	0.994621	0.992767	0.994907	0.993301	0.995972	0.996086	0.997969	0.976125	0.984918	0.985651
2:Antistreptavidin IgG2 LC	155	K155+Glycation	+Glycation	2:A136-K162 = 2895.4728m(K155+Glycation)	ATLVCLISDFYPGAVTVAWKADSSPVK	0.967004	0.966213	0.964018	0.970873	0.967939	0.975719	0.954801	0.952789	0.95228	0.951878	0.952138	0.952468
2:Antistreptavidin IgG2 LC	162	K162+Glycation	+Glycation	2:A156-K172 = 1673.8472m(K162+Glycation)	ADSSPVKAGVETTTPSK	0.998665	0.998652	0.998801	0.999157	0.998819	0.998817	0.9994	0.999527	0.999403	0.999318	0.999315	0.999272
2:Antistreptavidin IgG2 LC	164	G164(G164E)[GGA] (1 base change)	Sequence Variant (1 base change)	2:A163-K172 = 989.5029m(G164E)	AGVETTTPSK	0.999888	0.999889	0.999886	0.99991	0.999919	0.999919	0.999934	0.999937	0.999936	0.999943	0.999949	0.999949
2:Antistreptavidin IgG2 LC	165	V165(V165M)[GTG] (1 base change)	Sequence Variant (1 base change)	2:A163-K172 = 989.5029m(V165M)	AGVETTTPSK	0.999948	0.999951	0.999945	0.999946	0.999952	0.99995	0.999969	0.999971	0.999969	0.999962	0.99997	0.999968
2:Antistreptavidin IgG2 LC	177	K177+Glycation	+Glycation	2:Q173-K192 = 2314.1230m(K177+Glycation)	QSNNKYAASSYLSLTPEQWK	0.998181	0.998138	0.998025	0.997854	0.998087	0.997765	0.99884	0.998835	0.998747	0.998509	0.998531	0.998531
2:Antistreptavidin IgG2 LC	185	S185(S185R)[AGC] (1 base change)	Sequence Variant (1 base change)	2:Y178-S185 = 860.3916m(S185R)	YAASSYLS	0.999141	0.999103	0.999052	0.998963	0.998896	0.9989	0.99945	0.999443	0.999416	0.999329	0.999331	0.999331
2:Antistreptavidin IgG2 LC	185	S185(S185N)[AGC] (1 base change)	Sequence Variant (1 base change)	2:Y178-K192 = 1742.8516m(S185N)	YAASSYLSLTPEQWK	0.999141	0.999103	0.999052	0.998963	0.998896	0.9989	0.99945	0.999443	0.999416	0.999329	0.999331	0.999331
2:Antistreptavidin IgG2 LC	191	W191+Double Oxidation	+Double Oxidation	2:Y178-K192 = 1742.8516m(W191+Double Oxidation)	YAASSYLSLTPEQWK	0.999151	0.999295	0.999179	0.995844	0.997353	0.996362	0.999271	0.99934	0.99927	0.996088	0.997093	0.996906
2:Antistreptavidin IgG2 LC	191	W191+Oxidation	+Oxidation	2:Y178-K192 = 1742.8516m(W191+Oxidation)	YAASSYLSLTPEQWK	0.999151	0.999295	0.999179	0.995844	0.997353	0.996362	0.999271	0.99934	0.99927	0.996088	0.997093	0.996906
2:Antistreptavidin IgG2 LC	192	K192+Glycation	+Glycation	2:Y178-R195 = 2123.0436m(K192+Glycation)	YAASSYLSLTPEQWKSHR	0.995814	0.995556	0.995464	0.994965	0.995423	0.995179	0.998603	0.998528	0.998452	0.998197	0.998275	0.998302
2:Antistreptavidin IgG2 LC	196	S196(S196N)[AGC] (1 base change)	Sequence Variant (1 base change)	2:S196-K210 = 1711.7359m(S196N)	SYSCQVTHEGSTVEK	0.99994	0.999933	0.999953	0.999936	0.99991	0.999944	0.999956	0.999939	0.999934	0.999903	0.999927	0.999932
2:Antistreptavidin IgG2 LC	198	S198(S198N)[AGC] (1 base change)	Sequence Variant (1 base change)	2:S196-K210 = 1711.7359m(S198N)	SYSCQVTHEGSTVEK	0.999516	0.999529	0.999497	0.999411	0.99945	0.99948	0.999589	0.999547	0.999524	0.999385	0.999377	0.999343
2:Antistreptavidin IgG2 LC	201	V201(V201I)[GTC] (1 base change)	Sequence Variant (1 base change)	2:S196-K210 = 1711.7359m(V201I)	SYSCQVTHEGSTVEK	0.999841	0.999839	0.999837	0.99979	0.999833	0.999839	0.999855	0.99985	0.999844	0.999781	0.999785	0.99978
2:Antistreptavidin IgG2 LC	201	V201(V201M)[GTC] (2 base change)	Sequence Variant (2 base change)	2:S196-K210 = 1711.7359m(V201M)	SYSCQVTHEGSTVEK	0.999841	0.999839	0.999837	0.99979	0.999833	0.999839	0.999855	0.99985	0.999844	0.999781	0.999785	0.99978
2:Antistreptavidin IgG2 LC	203	H203(H203Q)[CAT] (1 base change)	Sequence Variant (1 base change)	2:S196-K210 = 1711.7359m(H203Q)	SYSCQVTHEGSTVEK	0.999971	0.999974	0.999971	0.999979	0.999979	0.999985	0.999939	0.999938	0.99994	0.999935	0.999918	0.99992
2:Antistreptavidin IgG2 LC	205	G205(G205D)[GGG] (2 base change)	Sequence Variant (2 base change)	2:S196-K210 = 1711.7359m(G205D)	SYSCQVTHEGSTVEK	0.999927	0.999929	0.99992	0.9999	0.999916	0.999912	0.999915	0.999909	0.999904	0.999876	0.99988	0.999867
2:Antistreptavidin IgG2 LC	206	S206(S206N)[AGC] (1 base change)	Sequence Variant (1 base change)	2:S196-K210 = 1711.7359m(S206N)	SYSCQVTHEGSTVEK	0.999818	0.999813	0.99982	0.999765	0.999795	0.999808	0.999827	0.999799	0.9998	0.999747	0.999744	0.999721
2:Antistreptavidin IgG2 LC	210	K210+Glycation	+Glycation	2:S196-S218 = 2558.0789m(K210+Glycation)	SYSCQVTHEGSTVEKTVAPTECS	0.998813	0.998795	0.998776	0.998927	0.999101	0.999216	0.997766	0.997415	0.997446	0.996918	0.996779	0.996648

## Sheet: 10% stressed
Antistreptavidin IgG2 Sample 2
(a-Calibration)
Protein Sequence
>Antistreptavidin IgG2 HC
QLQLQESGPGLVKPSGTLSLTCAVSGGSISSGNWWSWVRQPPGKGLEWIGEISHSGTTNYNPSLKSRVTISGDKSKNQFSLELTSVTAADTAVYYCARNFDYWGQGTLVTVSSASTKGPSVFPLAPCSRSTSESTAALGCLVKDYFPEPVTVSWNSGALTSGVHTFPAVLQSSGLYSLSSVVTVPSSNFGTQTYTCNVDHKPSNTKVDKTVERKCCVECPPCPAPPVAGPSVFLFPPKPKDTLMISRTPEVTCVVVDVSHEDPEVQFNWYVDGVEVHNAKTKPREEQFNSTFRVVSVLTVVHQDWLNGKEYKCKVSNKGLPAPIEKTISKTKGQPREPQVYTLPPSREEMTKNQVSLTCLVKGFYPSDIAVEWESNGQPENNYKTTPPMLDSDGSFFLY…
>Antistreptavidin IgG2 LC
QSVVTQPPSVSGAPGQRVTISCTGSSSNIGAGYDVHWYQQLPGTAPKLLIYGNSNRPSGVPDRFSGSKSGTSASLAITGLQAEDEADYYCQSYDSSLSGLYVFGTGTKVTVLGQPKANPTVTLFPPSSEELQANKATLVCLISDFYPGAVTVAWKADSSPVKAGVETTTPSKQSNNKYAASSYLSLTPEQWKSHRSYSCQVTHEGSTVEKTVAPTECS
Protease = Trypsin
Cleaves at C-terminus of KR
Key Data Processing Parameters
MS Noise Level = 3600
S/N Threshold = 331
Typical Chromatographic Peak Width = 0.14
Maximum Chromatographic Peak Width = 1.61
Mass Tolerance = 5 ppm
Max Time Shift before Alignment = 3.18 min
Maximum Peptide Mass = 6800
Mass Accuracy = 6 ppm
Disulfide Bonds = Reduced
Glycosylation = CHO Glycan
Crosslinks = No
Minimum Confidence = 0.8
Mass Changes for Unspecified Modifications = -58 - 17
Amino Acid Substitutions = Common misincorporations
Ion Selection Criteria for Quantitation
Peptide Selection Criteria = 50% of the most abundant peptide
Charge Selection Criteria = 33% of the most abundant charge state
File Name						ATS_Try_CS1_1	ATS_Try_CS1_2	ATS_Try_CS1_3	ATS_Try_CS1_1 (2)	ATS_Try_CS1_2 (2)	ATS_Try_CS1_3 (2)	ATS_Try_CS1_1 (3)	ATS_Try_CS1_2 (3)	ATS_Try_CS1_3 (3)	ATS_Try_CS1_1 (4)	ATS_Try_CS1_2 (4)	ATS_Try_CS1_3 (4)
Sample Name						ATS_Try_ControlandStability (9:1)	ATS_Try_ControlandStability (9:1)	ATS_Try_ControlandStability (9:1)	ATS_Try_ControlandStability (9:1)	ATS_Try_ControlandStability (9:1)	ATS_Try_ControlandStability (9:1)	ATS Control and Stability (9:1)	ATS Control and Stability (9:1)	ATS Control and Stability (9:1)	ATS Control and Stability (9:1)	ATS Control and Stability (9:1)	ATS Control and Stability (9:1)
Sample Id						11	12	13	11	12	13	21	22	23	21	22	23
Comment						Expt #2A, Column peptide CSH15cm, HPLC:Knox, Biospin desalting	Expt #2A, Column peptide CSH15cm, HPLC:Knox, Biospin desalting	Expt #2A, Column peptide CSH15cm, HPLC:Knox, Biospin desalting	Expt #2A, Column peptide CSH15cm, HPLC:Knox, Microcon 30K digestion	Expt #2A, Column peptide CSH15cm, HPLC:Knox, Microcon 30K digestion	Expt #2A, Column peptide CSH15cm, HPLC:Knox, Microcon 30K digestion	MAM expt 2A- Biospin_ MS: Lumos, LC: 1290 (Knox), peptide CSHcolumn with FA	MAM expt 2A- Biospin_ MS: Lumos, LC: 1290 (Knox), peptide CSHcolumn with FA	MAM expt 2A- Biospin_ MS: Lumos, LC: 1290 (Knox), peptide CSHcolumn with FA	MAM expt 2A- Biospin_ MS: Lumos, LC: 1290 (Knox), peptide CSHcolumn with FA	MAM expt 2A- Biospin_ MS: Lumos, LC: 1290 (Knox), peptide CSHcolumn with FA	MAM expt 2A- Biospin_ MS: Lumos, LC: 1290 (Knox), peptide CSHcolumn with FA
Injection Time (h)						202.345	203.439	204.533	249.119	250.215	251.309	365.955	367.049	368.143	387.268	388.364	389.458
Quality Controls
			Relative Load			0.306	0.33	0.307	0.218	0.268	0.285	0.778	0.773	0.759	0.882	0.968	0.952
			Identification Rate (by area)			0.6752	0.6762	0.6754	0.6673	0.676	0.6795	0.7032	0.7065	0.7061	0.6888	0.7023	0.703
			Abundance of Top Unidentified (> 500 Da, relative to top identified)			0.2681	0.3083	0.3376	0.3272	0.4012	0.383	0.3732	0.3527	0.3719	0.4864	0.6455	0.6715
			Digestion Efficiency			1	1	1	1	1	1	1	1	1	1	1	1
			Intensity&Length-Weighted Sequence Coverage			0.4521	0.4593	0.4581	0.4455	0.4519	0.4649	0.5251	0.5254	0.524	0.5354	0.5303	0.5347
			Ions (Modified) Meeting Selection Criteria for Quantitation			265	265	262	262	264	264	265	265	265	265	265	265
Protein	Residue #	Modification	Category	Modified Peptides	Peptide Sequence	Abundance as Peak Area												Avg	RSD
1:Antistreptavidin IgG2 HC	1	Q1+17.0265	N-Terminal Extension	1:Q1-R39 = 4113.0266m(Q1+17.0265)	QLQLQESGPGLVKPSGTLSLTCAVSGGSISSGNWWSWVR	0.0179737	0.0161769	0.0166622	0.0119284	0.0148368	0.0172015	0.0063131	0.00653233	0.00650587	0.00561188	0.00594045	0.00674578	0.0110357	0.47035
1:Antistreptavidin IgG2 HC	13	K13+Glycation	+Glycation	1:Q1-R39 = 4113.0266m(K13+Glycation)	QLQLQESGPGLVKPSGTLSLTCAVSGGSISSGNWWSWVR	0.000157914	0.000176022	0.000164554	0.000174945	0.000193631	0.00015344	0.000179283	0.000180645	0.00018698	0.000240598	0.000260845	0.000264616	0.000194456	0.199585
1:Antistreptavidin IgG2 HC	30	S30+C-term clip	C-term Clip	1:Q1-S30 = 2954.4907m[nonspecific]	QLQLQESGPGLVKPSGTLSLTCAVSGGSIS	0.000680897	0.000594536	0.000479384	0.000284969	0.000262064	0.000324832	0.00018393	0.000163337	0.000139681	0.000141367	0.000120422	0.000124035	0.000291621	0.663383
1:Antistreptavidin IgG2 HC	31	S31+N-term clip	N-term Clip	1:S31-R39 = 1176.5465m[nonspecific]	SGNWWSWVR	0.00243889	0.00255455	0.00222958	0.00267291	0.00293593	0.00271683	0.000508835	0.000496037	0.000478271	0.000609439	0.000692796	0.000635789	0.00158082	0.676801
1:Antistreptavidin IgG2 HC	34	~W34+Double Oxidation	+Double Oxidation	1:Q1-R39 = 4113.0266m(~W34+Double Oxidation)	QLQLQESGPGLVKPSGTLSLTCAVSGGSISSGNWWSWVR	0.00121231	0.00117836	0.000998571	0.00113373	0.0011678	0.000827918	0.00140971	0.00127206	0.00142204	0.00215438	0.00220065	0.00241732	0.00144957	0.356047
1:Antistreptavidin IgG2 HC	34	~W34+Oxidation to kynurenine	+Oxidation to kynurenine	1:Q1-R39 = 4113.0266m(~W34+Oxidation to kynurenine)	QLQLQESGPGLVKPSGTLSLTCAVSGGSISSGNWWSWVR	0.00148794	0.00148134	0.00148781	0.0016067	0.00190964	0.00160396	0.00131903	0.00121221	0.00119074	0.00142542	0.00140459	0.00144313	0.00146438	0.130956
1:Antistreptavidin IgG2 HC	37	~W37+Double Oxidation	+Double Oxidation	1:Q1-R39 = 4113.0266m(~W37+Double Oxidation)	QLQLQESGPGLVKPSGTLSLTCAVSGGSISSGNWWSWVR	0.00124397	0.00110267	0.000679394	0.000946836	0.00118006	0.00117403	0.00104377	0.00106931	0.00115274	0.00224574	0.00206631	0.00245498	0.00136332	0.413178
1:Antistreptavidin IgG2 HC	44	K44+Glycation	+Glycation	1:Q40-K65 = 2809.4035m(K44+Glycation)	QPPGKGLEWIGEISHSGTTNYNPSLK	0.000448043	0.000383862	0.00043406	0.000311241	0.000389459	0.000413404	0.000286844	0.000267997	0.000290316	0.000279548	0.000272615	0.000323743	0.000341761	0.197285
1:Antistreptavidin IgG2 HC	48	W48+Double Oxidation	+Double Oxidation	1:G45-K65 = 2302.1230m(W48+Double Oxidation)	GLEWIGEISHSGTTNYNPSLK	0.000505863	0.000418314	0.000449304	0.000845736	0.000920772	0.000827513	0.000411302	0.000372337	0.000377693	0.000697968	0.000694091	0.000722542	0.00060362	0.335001
1:Antistreptavidin IgG2 HC	48	W48+Oxidation	+Oxidation	1:G45-K65 = 2302.1230m(W48+Oxidation)	GLEWIGEISHSGTTNYNPSLK	0.000117307	9.89007e-05	0.000106214	8.62723e-05	0.000103886	0.000103183	8.41613e-05	7.58326e-05	8.45545e-05	9.45462e-05	9.10954e-05	9.77122e-05	9.53054e-05	0.121556
1:Antistreptavidin IgG2 HC	55	S55+C-term clip	C-term Clip	1:G45-S55 = 1226.5932m[nonspecific]	GLEWIGEISHS	6.695e-05	8.80734e-05	4.89933e-05	6.63714e-05	8.78026e-05	6.90445e-05	1.28503e-05	3.52194e-05	2.00647e-06	1.63974e-05	2.17778e-05	4.78816e-05	4.69473e-05	0.62656
1:Antistreptavidin IgG2 HC	56	G56(G56R)[GGG] (1 base change)	Sequence Variant (1 base change)	1:G45-G56 = 1283.6146m(G56R)	GLEWIGEISHSG	5.31947e-05	4.70172e-05	4.96574e-05	8.81396e-05	7.89221e-05	7.47025e-05	2.1607e-05	2.12988e-05	2.21731e-05	2.45224e-05	2.56629e-05	3.0435e-05	4.47777e-05	0.547933
1:Antistreptavidin IgG2 HC	56	G56+N-term clip	N-term Clip	1:G56-K65 = 1093.5404m[nonspecific]	GTTNYNPSLK	0.000126634	0.000106282	0.000106916	0.000126641	0.000106183	0.00010519	7.13739e-05	7.35412e-05	6.40654e-05	7.17104e-05	7.18186e-05	7.27798e-05	9.19279e-05	0.252697
1:Antistreptavidin IgG2 HC	59	N59(N59K)[AAC] (1 base change)	Sequence Variant (1 base change)	1:G45-N59 = 1599.7529m(N59K)	GLEWIGEISHSGTTN	8.88572e-05	7.67866e-05	8.03431e-05	0.000108127	0.000109728	0.000101009	3.67198e-05	3.94089e-05	3.82057e-05	4.81519e-05	4.92112e-05	4.76507e-05	6.86833e-05	0.415178
1:Antistreptavidin IgG2 HC	65	K65+Glycation	+Glycation	1:G45-R67 = 2545.2561m(K65+Glycation)	GLEWIGEISHSGTTNYNPSLKSR	0.00039029	0.000365584	0.000413084	0.000323935	0.000365922	0.000384494	0.000219985	0.000195743	0.000203618	0.000220947	0.000209931	0.000235834	0.000294114	0.293423
1:Antistreptavidin IgG2 HC	67	R67(R67Q)[CGA] (1 base change)	Sequence Variant (1 base change)	1:S66-K74 = 961.5193m(R67Q)	SRVTISGDK	6.76655e-05	7.14321e-05	7.86079e-05	6.23503e-05	6.03699e-05	6.00962e-05	0.000127306	8.64862e-05	0.000389788	0.00244258	0.00057581	0.000164294	0.000348899	1.94519
1:Antistreptavidin IgG2 HC	68	V68(V68I)[GTC] (1 base change)	Sequence Variant (1 base change)	1:V68-K74 = 718.38612m(V68I)	VTISGDK	8.58112e-05	8.96194e-05	9.95403e-05	9.01398e-05	8.59383e-05	8.86693e-05	0.000122535	8.48868e-05	0.000422454	0.00241908	0.000538257	0.000163392	0.000357527	1.8637
1:Antistreptavidin IgG2 HC	107	~T107+GalNAc-3SG	O-Glycan	1:N99-K117 = 2059.9851m(~T107+GalNAc-3SG)	NFDYWGQGTLVTVSSASTK	0.000228294	0.000255152	0.000320353	2.28787e-05	5.96621e-05	0.000107358	0.000124393	0.00012984	0.000137757	0.000118158	6.42728e-05	5.76319e-05	0.000135479	0.659906
1:Antistreptavidin IgG2 HC	107	T107+N-term clip	N-term Clip	1:T107-K117 = 1092.6027m[nonspecific]	TLVTVSSASTK	5.96889e-05	3.63844e-05	5.8218e-05	5.07856e-05	5.98811e-05	5.01642e-05	1.94776e-05	1.89614e-05	1.77838e-05	1.57634e-05	1.87004e-05	1.25768e-05	3.48655e-05	0.559218
1:Antistreptavidin IgG2 HC	117	K117+Hydroxylation	+Hydroxylation	1:N99-K117 = 2059.9851m(K117+Hydroxylation)	NFDYWGQGTLVTVSSASTK	0.0452258	0.0459115	0.0459887	0.0389247	0.0437433	0.040899	0.0478445	0.0488989	0.05049	0.0398519	0.0415909	0.0434535	0.0444019	0.0822808
1:Antistreptavidin IgG2 HC	120	~S120+GalNAc-3SG	O-Glycan	1:G118-R129 = 1287.6282m(~S120+GalNAc-3SG)	GPSVFPLAPCSR	9.75852e-05	8.97027e-05	8.37694e-05	6.52533e-05	6.86716e-05	7.87671e-05	0.000146987	0.000126842	0.000120563	0.000129605	0.000151334	0.000139675	0.00010823	0.287349
1:Antistreptavidin IgG2 HC	121	V121(V121I)[GTC] (1 base change)	Sequence Variant (1 base change)	1:G118-R129 = 1287.6282m(V121I)	GPSVFPLAPCSR	8.99288e-05	9.0216e-05	9.28615e-05	9.36024e-05	9.47016e-05	8.67281e-05	4.88499e-05	5.49842e-05	5.14996e-05	4.78493e-05	5.4571e-05	6.18782e-05	7.23059e-05	0.280396
1:Antistreptavidin IgG2 HC	122	F122(F122Y)[TTC] (1 base change)	Sequence Variant (1 base change)	1:G118-R129 = 1287.6282m(F122Y)	GPSVFPLAPCSR	9.09725e-05	8.24954e-05	9.23086e-05	8.69643e-05	8.1666e-05	8.18237e-05	5.9083e-05	5.8435e-05	6.46119e-05	5.88651e-05	6.33518e-05	6.25676e-05	7.35954e-05	0.183566
1:Antistreptavidin IgG2 HC	127	C127+C-term clip	C-term Clip	1:G118-C127 = 1044.4950m[nonspecific]	GPSVFPLAPC	0.000278519	0.000296427	0.000152739	0.000141337	0.00015463	0.000153144	0.000110438	0.000130326	6.696e-05	6.46887e-05	7.10312e-05	6.82605e-05	0.000140708	0.550828
1:Antistreptavidin IgG2 HC	127	C127(C127Y)[TGC] (1 base change)	Sequence Variant (1 base change)	1:G118-R129 = 1287.6282m(C127Y)	GPSVFPLAPCSR	2.95141e-05	2.76673e-05	2.81704e-05	4.46876e-05	5.10012e-05	4.96263e-05	1.27522e-05	1.23526e-05	1.27409e-05	2.14846e-05	2.30856e-05	2.06636e-05	2.78122e-05	0.497722
1:Antistreptavidin IgG2 HC	129	R129(R129K)[AGG] (1 base change)	Sequence Variant (1 base change)	1:G118-R129 = 1287.6282m(R129K)	GPSVFPLAPCSR	7.6944e-05	4.17881e-05	7.68392e-05	6.75706e-05	7.66989e-05	7.71459e-05	4.0646e-05	4.09143e-05	4.1787e-05	4.33118e-05	4.83169e-05	4.63511e-05	5.65261e-05	0.295039
1:Antistreptavidin IgG2 HC	131	T131+N-term clip	N-term Clip	1:T131-K143 = 1336.6544m[nonspecific]	TSESTAALGCLVK	0.000138969	0.000147194	0.000125738	0.000109318	0.000117962	0.000126516	8.58187e-05	9.61078e-05	8.50373e-05	8.03687e-05	8.5207e-05	8.27752e-05	0.000106751	0.22445
1:Antistreptavidin IgG2 HC	132	S132+N-term clip	N-term Clip	1:S132-K143 = 1235.6068m[nonspecific]	SESTAALGCLVK	0.000633081	0.0006015	0.000620688	0.000455151	0.000500161	0.0005075	0.000496282	0.000453949	0.000459835	0.000442865	0.00044931	0.000476301	0.000508052	0.137923
1:Antistreptavidin IgG2 HC	134	S134(S134N)[AGC] (1 base change)	Sequence Variant (1 base change)	1:S130-K143 = 1423.6865m(S134N)	STSESTAALGCLVK	0.000274459	0.000262309	0.000276209	0.000199104	0.000244122	0.000233242	0.000189521	0.000189771	0.000193261	0.000209565	0.000217912	0.000221739	0.000225935	0.14224
1:Antistreptavidin IgG2 HC	134	S134+N-term clip	N-term Clip	1:S134-K143 = 1019.5321m[nonspecific]	STAALGCLVK	0.000752784	0.000665813	0.000705124	0.000726178	0.000818458	0.000741777	0.000334173	0.000346773	0.000341778	0.000382246	0.000397351	0.000395723	0.000550681	0.356926
1:Antistreptavidin IgG2 HC	135	T135+N-term clip	N-term Clip	1:T135-K143 = 932.5001m[nonspecific]	TAALGCLVK	0.000185103	0.000164999	0.000149976	0.000128331	0.000162503	0.000148635	8.70848e-05	8.40819e-05	7.43356e-05	7.28917e-05	7.88002e-05	8.12241e-05	0.000118164	0.358105
1:Antistreptavidin IgG2 HC	136	A136(A136T)[GCG] (1 base change)	Sequence Variant (1 base change)	1:S130-K143 = 1423.6865m(A136T)	STSESTAALGCLVK	3.57189e-05	3.13842e-05	3.94834e-05	3.63481e-05	3.74084e-05	3.9004e-05	2.74179e-05	2.43895e-05	2.59005e-05	2.79781e-05	3.18148e-05	2.87236e-05	3.2131e-05	0.165294
[truncated: 324 more rows]

## Sheet: 20% stressed
Antistreptavidin IgG2 Sample 3
(a-Calibration)
Protein Sequence
>Antistreptavidin IgG2 HC
[truncated: 392 more rows]

## Sheet: a
Antistreptavidin IgG2 Response Factor Correlation Factors
(a-Calibration)
Protein Sequence
>Antistreptavidin IgG2 HC
[truncated: 392 more rows]

## Sheet: Stressed-a corrected
Antistreptavidin IgG2 Sample-1 a-calibration
(a-Calibration)
Protein Sequence
[truncated: 572 more rows]

## Sheet: 10% stressed-a corrected
Antistreptavidin IgG2 Sample-2 a-calibration
[truncated: 574 more rows]

[truncated: 3 more sheets: 20% stressed-a corected, Compare RSD, Plot]
